# Supplementary material for: An exceptionally flexible hydrogen-bonded organic framework with large-scale void regulation and adaptive guest accommodation abilities
Source: PubMed Central journal article supplement (PMC6625987; doi:10.1038/s41467-019-10575-5), 2019-07-12
Supplement: 41467_2019_10575_MOESM3_ESM.pdf [file 41467_2019_10575_MOESM3_ESM.pdf]

Figure 4a

| Relative pressure $P/P_0$ | Uptake ( $\text{cm}^3 \cdot \text{g}^{-1}$ , STP) | Relative pressure $P/P_0$ | Uptake ( $\text{cm}^3 \cdot \text{g}^{-1}$ , STP) | Relative pressure $P/P_0$ | Uptake ( $\text{cm}^3 \cdot \text{g}^{-1}$ , STP) | Relative pressure $P/P_0$ | Uptake ( $\text{cm}^3 \cdot \text{g}^{-1}$ , STP) |
|---------------------------|---------------------------------------------------|---------------------------|---------------------------------------------------|---------------------------|---------------------------------------------------|---------------------------|---------------------------------------------------|
| 2.77E-04                  | 1.6573                                            | 0.94719                   | 106.9397                                          | 0.00565                   | 0.67914                                           | 0.99208                   | 7.22814                                           |
| 8.74E-04                  | 3.7484                                            | 0.93026                   | 107.41238                                         | 0.01151                   | 0.80889                                           | 0.94495                   | 3.77939                                           |
| 0.0013                    | 5.879                                             | 0.8802                    | 107.85399                                         | 0.023                     | 0.91387                                           | 0.90678                   | 3.10576                                           |
| 0.00176                   | 8.00342                                           | 0.82566                   | 107.6382                                          | 0.03451                   | 0.996                                             | 0.87142                   | 2.80409                                           |
| 0.00244                   | 10.11271                                          | 0.77538                   | 107.24767                                         | 0.04003                   | 1.03216                                           | 0.83625                   | 2.61914                                           |
| 0.00403                   | 11.92759                                          | 0.72548                   | 106.63511                                         | 0.05004                   | 1.05876                                           | 0.80114                   | 2.51146                                           |
| 0.00745                   | 13.38048                                          | 0.67435                   | 105.87803                                         | 0.08501                   | 1.17233                                           | 0.76608                   | 2.41749                                           |
| 0.0113                    | 14.33333                                          | 0.62466                   | 104.85176                                         | 0.11999                   | 1.24865                                           | 0.73101                   | 2.36356                                           |
| 0.0191                    | 15.63356                                          | 0.57551                   | 103.59128                                         | 0.15497                   | 1.32397                                           | 0.69598                   | 2.30769                                           |
| 0.02966                   | 16.88451                                          | 0.52768                   | 100.0041                                          | 0.19001                   | 1.39158                                           | 0.66094                   | 2.27105                                           |
| 0.03982                   | 17.79732                                          | 0.48348                   | 88.7294                                           | 0.22502                   | 1.44482                                           | 0.62592                   | 2.23588                                           |
| 0.04982                   | 18.62523                                          | 0.46492                   | 85.1034                                           | 0.26006                   | 1.47082                                           | 0.59071                   | 2.22283                                           |
| 0.06064                   | 19.38014                                          | 0.42397                   | 80.21876                                          | 0.31429                   | 1.56513                                           | 0.55575                   | 2.20113                                           |
| 0.06997                   | 19.92655                                          | 0.37363                   | 78.81555                                          | 0.34926                   | 1.62967                                           | 0.52068                   | 2.14883                                           |
| 0.08034                   | 20.51859                                          | 0.32614                   | 77.69686                                          | 0.38424                   | 1.65517                                           | 0.48574                   | 2.10906                                           |
| 0.09048                   | 21.0507                                           | 0.28134                   | 68.3947                                           | 0.41925                   | 1.70116                                           | 0.45073                   | 2.08895                                           |
| 0.1                       | 21.53318                                          | 0.25977                   | 56.8748                                           | 0.45419                   | 1.74134                                           | 0.41571                   | 2.05535                                           |
| 0.11042                   | 22.03585                                          | 0.23898                   | 45.86419                                          | 0.48923                   | 1.77887                                           | 0.38074                   | 2.00118                                           |
| 0.11991                   | 22.53127                                          | 0.22275                   | 39.96441                                          | 0.52423                   | 1.83482                                           | 0.3458                    | 1.96331                                           |
| 0.13024                   | 23.02283                                          | 0.17261                   | 32.15472                                          | 0.55907                   | 1.85935                                           | 0.3108                    | 1.93135                                           |
| 0.13992                   | 23.46938                                          | 0.14377                   | 30.16472                                          | 0.59416                   | 1.91952                                           | 0.27585                   | 1.88131                                           |
| 0.14985                   | 23.90974                                          | 0.12851                   | 29.23177                                          | 0.62912                   | 1.9667                                            | 0.24083                   | 1.82596                                           |
| 0.15998                   | 24.31067                                          | 0.10044                   | 27.50385                                          | 0.66422                   | 1.99811                                           | 0.20588                   | 1.77368                                           |
| 0.18049                   | 25.0736                                           | 0.08048                   | 26.00237                                          | 0.69898                   | 2.05202                                           | 0.1709                    | 1.72393                                           |
| 0.20076                   | 25.7844                                           | 0.06013                   | 24.18656                                          | 0.73395                   | 2.13725                                           | 0.13595                   | 1.64698                                           |
| 0.2254                    | 26.55567                                          | 0.04994                   | 23.14101                                          | 0.76896                   | 2.19323                                           | 0.12057                   | 1.62156                                           |
| 0.2504                    | 27.36919                                          | 0.04012                   | 21.99728                                          | 0.80388                   | 2.29733                                           | 0.07245                   | 1.5111                                            |
| 0.29827                   | 29.52416                                          | 0.03009                   | 20.72032                                          | 0.8389                    | 2.40259                                           | 0.0501                    | 1.43425                                           |
| 0.35081                   | 31.60337                                          | 0.02057                   | 19.06321                                          | 0.87382                   | 2.57338                                           |                           |                                                   |
| 0.40106                   | 32.75513                                          | 0.00983                   | 16.60129                                          | 0.89007                   | 2.6939                                            |                           |                                                   |
| 0.44974                   | 33.58352                                          |                           |                                                   | 0.92492                   | 3.0825                                            |                           |                                                   |
| 0.50017                   | 34.26182                                          |                           |                                                   | 0.95954                   | 3.94462                                           |                           |                                                   |
| 0.55035                   | 34.79028                                          |                           |                                                   | 0.99208                   | 7.22814                                           |                           |                                                   |
| 0.60038                   | 35.20679                                          |                           |                                                   |                           |                                                   |                           |                                                   |
| 0.6504                    | 35.64477                                          |                           |                                                   |                           |                                                   |                           |                                                   |
| 0.70158                   | 45.5503                                           |                           |                                                   |                           |                                                   |                           |                                                   |
| 0.74262                   | 57.43657                                          |                           |                                                   |                           |                                                   |                           |                                                   |
| 0.75488                   | 60.64166                                          |                           |                                                   |                           |                                                   |                           |                                                   |
| 0.79589                   | 74.03305                                          |                           |                                                   |                           |                                                   |                           |                                                   |
| 0.84264                   | 85.86659                                          |                           |                                                   |                           |                                                   |                           |                                                   |

0.85657

87.89661

0.89643

98.31885

0.94719

106.9397

Figure 4b

| Temp (°C) | Endo >   |
|-----------|----------|
| -0.153    | -0.03    |
| -0.053    | -0.03    |
| 0.047     | -0.02637 |
| 0.147     | -0.02058 |
| 0.247     | -0.01065 |
| 0.347     | 0.00281  |
| 0.447     | 0.01376  |
| 0.547     | 0.02702  |
| 0.647     | 0.03822  |
| 0.747     | 0.04918  |
| 0.847     | 0.06004  |
| 0.947     | 0.06948  |
| 1.047     | 0.0789   |
| 1.147     | 0.08765  |
| 1.247     | 0.09621  |
| 1.347     | 0.10392  |
| 1.447     | 0.11145  |
| 1.547     | 0.11839  |
| 1.647     | 0.12363  |
| 1.747     | 0.13085  |
| 1.847     | 0.13688  |
| 1.947     | 0.14308  |
| 2.047     | 0.14769  |
| 2.147     | 0.15293  |
| 2.247     | 0.15811  |
| 2.347     | 0.1638   |
| 2.447     | 0.16817  |
| 2.547     | 0.17246  |
| 2.647     | 0.17608  |
| 2.747     | 0.17985  |
| 2.847     | 0.18353  |
| 2.947     | 0.18728  |
| 3.047     | 0.19019  |
| 3.147     | 0.19306  |
| 3.247     | 0.19634  |
| 3.347     | 0.19826  |
| 3.447     | 0.19987  |
| 3.547     | 0.2038   |
| 3.647     | 0.20641  |
| 3.747     | 0.20844  |

Figure 4c

| 2 $\theta$ (°) | Intensity (a.u.) | 2 $\theta$ (°) | Intensity (a.u.) | 2 $\theta$ (°) | Intensity (a.u.) | 2 $\theta$ (°) | Intensity (a.u.) | 2 $\theta$ (°) | Intensity (a.u.) | 2 $\theta$ (°) | Intensity (a.u.) |
|----------------|------------------|----------------|------------------|----------------|------------------|----------------|------------------|----------------|------------------|----------------|------------------|
| 5              | 0                | 5              | 0.6              | 5              | 1.2              | 5              | 1.8              | 5              | 2.4              |                |                  |
| 5.01969        | 0.00228          | 5.01969        | 0.59622          | 5.01969        | 1.19944          | 5.01969        | 1.80882          | 5.01969        | 2.39687          |                |                  |
| 5.03938        | 0.00184          | 5.03938        | 0.59914          | 5.03938        | 1.20326          | 5.03938        | 1.79713          | 5.03938        | 2.40217          |                |                  |
| 5.05907        | 0.00121          | 5.05907        | 0.60437          | 5.05907        | 1.20317          | 5.05907        | 1.80214          | 5.05907        | 2.39862          |                |                  |
| 5.07876        | 0.00226          | 5.07876        | 0.6004           | 5.07876        | 1.20126          | 5.07876        | 1.80845          | 5.07876        | 2.39198          |                |                  |
| 5.09844        | -6.49E-04        | 5.09844        | 0.60864          | 5.09844        | 1.20003          | 5.09844        | 1.80908          | 5.09844        | 2.39485          |                |                  |
| 5.11813        | 0.00546          | 5.11813        | 0.60148          | 5.11813        | 1.19905          | 5.11813        | 1.80596          | 5.11813        | 2.3973           |                |                  |
| 5.13782        | 0.00807          | 5.13782        | 0.60183          | 5.13782        | 1.20592          | 5.13782        | 1.80534          | 5.13782        | 2.39684          |                |                  |
| 5.15751        | 0.00166          | 5.15751        | 0.6038           | 5.15751        | 1.20113          | 5.15751        | 1.80459          | 5.15751        | 2.3968           |                |                  |
| 5.1772         | 0.00446          | 5.1772         | 0.59777          | 5.1772         | 1.20366          | 5.1772         | 1.79991          | 5.1772         | 2.39895          |                |                  |
| 5.19689        | 0                | 5.19689        | 0.6              | 5.19689        | 1.2              | 5.19689        | 1.80323          | 5.19689        | 2.4              |                |                  |
| 5.21658        | 0.00487          | 5.21658        | 0.60314          | 5.21658        | 1.19925          | 5.21658        | 1.80305          | 5.21658        | 2.406            |                |                  |
| 5.23627        | 9.86E-04         | 5.23627        | 0.59932          | 5.23627        | 1.20103          | 5.23627        | 1.80817          | 5.23627        | 2.40128          |                |                  |
| 5.25596        | 0.00586          | 5.25596        | 0.60578          | 5.25596        | 1.19862          | 5.25596        | 1.79912          | 5.25596        | 2.40092          |                |                  |
| 5.27565        | 0.008            | 5.27565        | 0.60121          | 5.27565        | 1.20205          | 5.27565        | 1.80537          | 5.27565        | 2.40256          |                |                  |
| 5.29534        | 0.00691          | 5.29534        | 0.60773          | 5.29534        | 1.20781          | 5.29534        | 1.80262          | 5.29534        | 2.39953          |                |                  |
| 5.31503        | 0.01405          | 5.31503        | 0.61599          | 5.31503        | 1.20623          | 5.31503        | 1.79738          | 5.31503        | 2.3979           |                |                  |
| 5.33472        | 0.00906          | 5.33472        | 0.61068          | 5.33472        | 1.20899          | 5.33472        | 1.80707          | 5.33472        | 2.39826          |                |                  |
| 5.3544         | 0.01555          | 5.3544         | 0.61876          | 5.3544         | 1.20974          | 5.3544         | 1.8097           | 5.3544         | 2.39372          |                |                  |
| 5.37409        | 0.02042          | 5.37409        | 0.61858          | 5.37409        | 1.2063           | 5.37409        | 1.81414          | 5.37409        | 2.39688          |                |                  |
| 5.39378        | 0.01303          | 5.39378        | 0.63342          | 5.39378        | 1.21407          | 5.39378        | 1.82083          | 5.39378        | 2.40542          |                |                  |
| 5.41347        | 0.02355          | 5.41347        | 0.63774          | 5.41347        | 1.21807          | 5.41347        | 1.82521          | 5.41347        | 2.39155          |                |                  |
| 5.43316        | 0.02705          | 5.43316        | 0.64676          | 5.43316        | 1.22687          | 5.43316        | 1.83052          | 5.43316        | 2.40107          |                |                  |
| 5.45285        | 0.0434           | 5.45285        | 0.66285          | 5.45285        | 1.22787          | 5.45285        | 1.83528          | 5.45285        | 2.39992          |                |                  |
| 5.47254        | 0.03978          | 5.47254        | 0.67118          | 5.47254        | 1.23497          | 5.47254        | 1.85353          | 5.47254        | 2.39713          |                |                  |
| 5.49223        | 0.04873          | 5.49223        | 0.69715          | 5.49223        | 1.23948          | 5.49223        | 1.86728          | 5.49223        | 2.40083          |                |                  |
| 5.51192        | 0.06262          | 5.51192        | 0.71287          | 5.51192        | 1.25283          | 5.51192        | 1.86666          | 5.51192        | 2.40399          |                |                  |
| 5.53161        | 0.06554          | 5.53161        | 0.71769          | 5.53161        | 1.24175          | 5.53161        | 1.85535          | 5.53161        | 2.4006           |                |                  |
| 5.55129        | 0.07171          | 5.55129        | 0.71401          | 5.55129        | 1.24131          | 5.55129        | 1.83905          | 5.55129        | 2.39981          |                |                  |
| 5.57098        | 0.06387          | 5.57098        | 0.70437          | 5.57098        | 1.22888          | 5.57098        | 1.82149          | 5.57098        | 2.40048          |                |                  |
| 5.59067        | 0.06005          | 5.59067        | 0.68573          | 5.59067        | 1.22658          | 5.59067        | 1.82212          | 5.59067        | 2.4              |                |                  |
| 5.61036        | 0.05448          | 5.61036        | 0.67472          | 5.61036        | 1.21623          | 5.61036        | 1.82013          | 5.61036        | 2.39834          |                |                  |
| 5.63005        | 0.04398          | 5.63005        | 0.67836          | 5.63005        | 1.21811          | 5.63005        | 1.82794          | 5.63005        | 2.39808          |                |                  |
| 5.64974        | 0.0493           | 5.64974        | 0.68707          | 5.64974        | 1.21493          | 5.64974        | 1.83226          | 5.64974        | 2.40091          |                |                  |
| 5.66943        | 0.05709          | 5.66943        | 0.70466          | 5.66943        | 1.2292           | 5.66943        | 1.84176          | 5.66943        | 2.40234          |                |                  |
| 5.68912        | 0.07655          | 5.68912        | 0.73701          | 5.68912        | 1.22861          | 5.68912        | 1.85489          | 5.68912        | 2.39353          |                |                  |
| 5.70881        | 0.09653          | 5.70881        | 0.77776          | 5.70881        | 1.23906          | 5.70881        | 1.86545          | 5.70881        | 2.39745          |                |                  |
| 5.7285         | 0.1193           | 5.7285         | 0.81588          | 5.7285         | 1.25168          | 5.7285         | 1.89414          | 5.7285         | 2.40355          |                |                  |
| 5.74819        | 0.14615          | 5.74819        | 0.85631          | 5.74819        | 1.26167          | 5.74819        | 1.91639          | 5.74819        | 2.40541          |                |                  |
| 5.76788        | 0.17534          | 5.76788        | 0.90394          | 5.76788        | 1.28085          | 5.76788        | 1.95776          | 5.76788        | 2.39308          |                |                  |

|       |         |         |          |         |         |         |         |         |         |         |         |
|-------|---------|---------|----------|---------|---------|---------|---------|---------|---------|---------|---------|
| 3.847 | 0.21098 | 5.78756 | 0.19117  | 5.78756 | 0.95957 | 5.78756 | 1.31175 | 5.78756 | 1.99332 | 5.78756 | 2.40403 |
| 3.947 | 0.21273 | 5.80725 | 0.20149  | 5.80725 | 0.96934 | 5.80725 | 1.33372 | 5.80725 | 2.0575  | 5.80725 | 2.39365 |
| 4.047 | 0.21501 | 5.82694 | 0.20772  | 5.82694 | 0.95264 | 5.82694 | 1.37082 | 5.82694 | 2.13186 | 5.82694 | 2.40908 |
| 4.147 | 0.21722 | 5.84663 | 0.18833  | 5.84663 | 0.89983 | 5.84663 | 1.42408 | 5.84663 | 2.19579 | 5.84663 | 2.40815 |
| 4.247 | 0.21894 | 5.86632 | 0.13932  | 5.86632 | 0.82693 | 5.86632 | 1.48354 | 5.86632 | 2.23979 | 5.86632 | 2.40455 |
| 4.347 | 0.2202  | 5.88601 | 0.09866  | 5.88601 | 0.75523 | 5.88601 | 1.54857 | 5.88601 | 2.23748 | 5.88601 | 2.40108 |
| 4.447 | 0.2218  | 5.9057  | 0.06125  | 5.9057  | 0.70642 | 5.9057  | 1.62057 | 5.9057  | 2.13488 | 5.9057  | 2.40402 |
| 4.547 | 0.22376 | 5.92539 | 0.04148  | 5.92539 | 0.662   | 5.92539 | 1.64915 | 5.92539 | 2.01322 | 5.92539 | 2.40188 |
| 4.647 | 0.22539 | 5.94508 | 0.02093  | 5.94508 | 0.64342 | 5.94508 | 1.6437  | 5.94508 | 1.89    | 5.94508 | 2.39926 |
| 4.747 | 0.22606 | 5.96477 | 0.01121  | 5.96477 | 0.63272 | 5.96477 | 1.57933 | 5.96477 | 1.84495 | 5.96477 | 2.40354 |
| 4.847 | 0.22679 | 5.98445 | 0.01323  | 5.98445 | 0.62547 | 5.98445 | 1.49245 | 5.98445 | 1.81702 | 5.98445 | 2.4     |
| 4.947 | 0.22784 | 6.00414 | 0.00695  | 6.00414 | 0.61377 | 6.00414 | 1.37996 | 6.00414 | 1.80796 | 6.00414 | 2.40029 |
| 5.047 | 0.22911 | 6.02383 | 0.01383  | 6.02383 | 0.61516 | 6.02383 | 1.29504 | 6.02383 | 1.80528 | 6.02383 | 2.40082 |
| 5.147 | 0.23059 | 6.04352 | 0.01091  | 6.04352 | 0.61523 | 6.04352 | 1.24745 | 6.04352 | 1.80884 | 6.04352 | 2.40384 |
| 5.247 | 0.23201 | 6.06321 | 0.00119  | 6.06321 | 0.61974 | 6.06321 | 1.22284 | 6.06321 | 1.8026  | 6.06321 | 2.40522 |
| 5.347 | 0.23241 | 6.0829  | 0.00626  | 6.0829  | 0.60798 | 6.0829  | 1.21822 | 6.0829  | 1.80716 | 6.0829  | 2.40442 |
| 5.447 | 0.23315 | 6.10259 | 0.01022  | 6.10259 | 0.60673 | 6.10259 | 1.20683 | 6.10259 | 1.80598 | 6.10259 | 2.40434 |
| 5.547 | 0.23406 | 6.12228 | 0.00303  | 6.12228 | 0.60305 | 6.12228 | 1.20835 | 6.12228 | 1.80399 | 6.12228 | 2.40324 |
| 5.647 | 0.23508 | 6.14197 | 1.17E-04 | 6.14197 | 0.59861 | 6.14197 | 1.20703 | 6.14197 | 1.80893 | 6.14197 | 2.40941 |
| 5.747 | 0.23579 | 6.16166 | 0.01017  | 6.16166 | 0.5953  | 6.16166 | 1.20421 | 6.16166 | 1.80631 | 6.16166 | 2.40388 |
| 5.847 | 0.23616 | 6.18135 | 0        | 6.18135 | 0.60019 | 6.18135 | 1.2     | 6.18135 | 1.8     | 6.18135 | 2.40459 |
| 5.947 | 0.23641 | 6.20104 | 0.01646  | 6.20104 | 0.6027  | 6.20104 | 1.20293 | 6.20104 | 1.80155 | 6.20104 | 2.41033 |
| 6.047 | 0.23695 | 6.22072 | 0.00952  | 6.22072 | 0.60877 | 6.22072 | 1.20358 | 6.22072 | 1.79835 | 6.22072 | 2.41723 |
| 6.147 | 0.23825 | 6.24041 | 0.00225  | 6.24041 | 0.60734 | 6.24041 | 1.2032  | 6.24041 | 1.80915 | 6.24041 | 2.41134 |
| 6.247 | 0.23809 | 6.2601  | 0.0049   | 6.2601  | 0.60628 | 6.2601  | 1.20262 | 6.2601  | 1.80151 | 6.2601  | 2.42096 |
| 6.347 | 0.2392  | 6.27979 | 0.00612  | 6.27979 | 0.60479 | 6.27979 | 1.20224 | 6.27979 | 1.80518 | 6.27979 | 2.42204 |
| 6.447 | 0.23947 | 6.29948 | 0.01558  | 6.29948 | 0.60799 | 6.29948 | 1.19417 | 6.29948 | 1.80442 | 6.29948 | 2.43863 |
| 6.547 | 0.23959 | 6.31917 | 0.01208  | 6.31917 | 0.60568 | 6.31917 | 1.20092 | 6.31917 | 1.81428 | 6.31917 | 2.44765 |
| 6.647 | 0.23975 | 6.33886 | 0.00597  | 6.33886 | 0.60481 | 6.33886 | 1.1961  | 6.33886 | 1.81583 | 6.33886 | 2.45309 |
| 6.747 | 0.23983 | 6.35855 | 0.00363  | 6.35855 | 0.59987 | 6.35855 | 1.20713 | 6.35855 | 1.81956 | 6.35855 | 2.47168 |
| 6.847 | 0.24075 | 6.37824 | 0.00116  | 6.37824 | 0.6     | 6.37824 | 1.20128 | 6.37824 | 1.8078  | 6.37824 | 2.48397 |
| 6.947 | 0.24084 | 6.39793 | -0.00222 | 6.39793 | 0.6064  | 6.39793 | 1.19904 | 6.39793 | 1.8161  | 6.39793 | 2.50765 |
| 7.047 | 0.24079 | 6.41761 | 0.00873  | 6.41761 | 0.60974 | 6.41761 | 1.20063 | 6.41761 | 1.8239  | 6.41761 | 2.52043 |
| 7.147 | 0.24112 | 6.4373  | 0.00503  | 6.4373  | 0.60463 | 6.4373  | 1.20025 | 6.4373  | 1.81182 | 6.4373  | 2.54338 |
| 7.247 | 0.24105 | 6.45699 | 0.01066  | 6.45699 | 0.6049  | 6.45699 | 1.19791 | 6.45699 | 1.82631 | 6.45699 | 2.5607  |
| 7.347 | 0.24122 | 6.47668 | 0.00774  | 6.47668 | 0.61312 | 6.47668 | 1.19376 | 6.47668 | 1.82386 | 6.47668 | 2.55524 |
| 7.447 | 0.24177 | 6.49637 | 0.00779  | 6.49637 | 0.60375 | 6.49637 | 1.20159 | 6.49637 | 1.8196  | 6.49637 | 2.54292 |
| 7.547 | 0.24187 | 6.51606 | 0.00526  | 6.51606 | 0.60296 | 6.51606 | 1.19672 | 6.51606 | 1.81358 | 6.51606 | 2.51327 |
| 7.647 | 0.2415  | 6.53575 | 0.0105   | 6.53575 | 0.61249 | 6.53575 | 1.20083 | 6.53575 | 1.81982 | 6.53575 | 2.48998 |
| 7.747 | 0.24145 | 6.55544 | 0.00764  | 6.55544 | 0.60932 | 6.55544 | 1.2003  | 6.55544 | 1.82155 | 6.55544 | 2.45421 |
| 7.847 | 0.24159 | 6.57513 | 0.00835  | 6.57513 | 0.61047 | 6.57513 | 1.20354 | 6.57513 | 1.80848 | 6.57513 | 2.43692 |
| 7.947 | 0.24167 | 6.59482 | 0.00679  | 6.59482 | 0.60367 | 6.59482 | 1.19598 | 6.59482 | 1.8144  | 6.59482 | 2.42406 |
| 8.047 | 0.24195 | 6.61451 | 0.00924  | 6.61451 | 0.60669 | 6.61451 | 1.20872 | 6.61451 | 1.80777 | 6.61451 | 2.41362 |
| 8.147 | 0.24195 | 6.6342  | 0.00658  | 6.6342  | 0.61015 | 6.6342  | 1.1992  | 6.6342  | 1.80457 | 6.6342  | 2.41719 |

|        |         |         |         |         |         |         |         |         |         |         |         |
|--------|---------|---------|---------|---------|---------|---------|---------|---------|---------|---------|---------|
| 8.247  | 0.24167 | 6.65388 | 0.01422 | 6.65388 | 0.60905 | 6.65388 | 1.20115 | 6.65388 | 1.8068  | 6.65388 | 2.4062  |
| 8.347  | 0.24175 | 6.67357 | 0.00721 | 6.67357 | 0.60513 | 6.67357 | 1.20087 | 6.67357 | 1.80666 | 6.67357 | 2.4151  |
| 8.447  | 0.24172 | 6.69326 | 0.01181 | 6.69326 | 0.60264 | 6.69326 | 1.20576 | 6.69326 | 1.80615 | 6.69326 | 2.41393 |
| 8.547  | 0.24127 | 6.71295 | 0.01569 | 6.71295 | 0.61042 | 6.71295 | 1.20172 | 6.71295 | 1.80264 | 6.71295 | 2.4078  |
| 8.647  | 0.24137 | 6.73264 | 0.01114 | 6.73264 | 0.59887 | 6.73264 | 1.20655 | 6.73264 | 1.80231 | 6.73264 | 2.41481 |
| 8.747  | 0.24148 | 6.75233 | 0.0088  | 6.75233 | 0.60658 | 6.75233 | 1.20576 | 6.75233 | 1.80699 | 6.75233 | 2.40662 |
| 8.847  | 0.24136 | 6.77202 | 0.01489 | 6.77202 | 0.60604 | 6.77202 | 1.20373 | 6.77202 | 1.8091  | 6.77202 | 2.42012 |
| 8.947  | 0.24121 | 6.79171 | 0.01041 | 6.79171 | 0.61076 | 6.79171 | 1.20531 | 6.79171 | 1.8039  | 6.79171 | 2.41859 |
| 9.047  | 0.24108 | 6.8114  | 0.01138 | 6.8114  | 0.61003 | 6.8114  | 1.19915 | 6.8114  | 1.79739 | 6.8114  | 2.41416 |
| 9.147  | 0.24123 | 6.83109 | 0.00631 | 6.83109 | 0.61568 | 6.83109 | 1.20322 | 6.83109 | 1.80587 | 6.83109 | 2.41911 |
| 9.247  | 0.24108 | 6.85077 | 0.00831 | 6.85077 | 0.60888 | 6.85077 | 1.20253 | 6.85077 | 1.80448 | 6.85077 | 2.4237  |
| 9.347  | 0.24082 | 6.87046 | 0.00902 | 6.87046 | 0.60921 | 6.87046 | 1.21041 | 6.87046 | 1.80822 | 6.87046 | 2.42181 |
| 9.447  | 0.24086 | 6.89015 | 0.01647 | 6.89015 | 0.61111 | 6.89015 | 1.20218 | 6.89015 | 1.80608 | 6.89015 | 2.41798 |
| 9.547  | 0.24087 | 6.90984 | 0.01024 | 6.90984 | 0.611   | 6.90984 | 1.20454 | 6.90984 | 1.80613 | 6.90984 | 2.42057 |
| 9.647  | 0.24059 | 6.92953 | 0.01049 | 6.92953 | 0.61397 | 6.92953 | 1.21098 | 6.92953 | 1.80393 | 6.92953 | 2.41262 |
| 9.747  | 0.24054 | 6.94922 | 0.01385 | 6.94922 | 0.61117 | 6.94922 | 1.20606 | 6.94922 | 1.80604 | 6.94922 | 2.40909 |
| 9.847  | 0.24049 | 6.96891 | 0.01929 | 6.96891 | 0.6147  | 6.96891 | 1.20759 | 6.96891 | 1.80928 | 6.96891 | 2.41302 |
| 9.947  | 0.24017 | 6.9886  | 0.01825 | 6.9886  | 0.61422 | 6.9886  | 1.20566 | 6.9886  | 1.80364 | 6.9886  | 2.407   |
| 10.047 | 0.23994 | 7.00829 | 0.01481 | 7.00829 | 0.61411 | 7.00829 | 1.20921 | 7.00829 | 1.80744 | 7.00829 | 2.4062  |
| 10.147 | 0.23987 | 7.02798 | 0.01655 | 7.02798 | 0.61319 | 7.02798 | 1.20775 | 7.02798 | 1.80367 | 7.02798 | 2.41091 |
| 10.247 | 0.23969 | 7.04767 | 0.01758 | 7.04767 | 0.61691 | 7.04767 | 1.20561 | 7.04767 | 1.80553 | 7.04767 | 2.4132  |
| 10.347 | 0.23964 | 7.06736 | 0.019   | 7.06736 | 0.61367 | 7.06736 | 1.20518 | 7.06736 | 1.80758 | 7.06736 | 2.4064  |
| 10.447 | 0.2393  | 7.08704 | 0.01212 | 7.08704 | 0.60399 | 7.08704 | 1.20713 | 7.08704 | 1.80345 | 7.08704 | 2.40657 |
| 10.547 | 0.23956 | 7.10673 | 0.01743 | 7.10673 | 0.60477 | 7.10673 | 1.20716 | 7.10673 | 1.80293 | 7.10673 | 2.40716 |
| 10.647 | 0.23868 | 7.12642 | 0.00685 | 7.12642 | 0.61386 | 7.12642 | 1.20689 | 7.12642 | 1.80648 | 7.12642 | 2.40345 |
| 10.747 | 0.23876 | 7.14611 | 0.01294 | 7.14611 | 0.61063 | 7.14611 | 1.20661 | 7.14611 | 1.80822 | 7.14611 | 2.41168 |
| 10.847 | 0.23915 | 7.1658  | 0.01948 | 7.1658  | 0.61403 | 7.1658  | 1.20613 | 7.1658  | 1.81389 | 7.1658  | 2.40912 |
| 10.947 | 0.23908 | 7.18549 | 0.01202 | 7.18549 | 0.6143  | 7.18549 | 1.20348 | 7.18549 | 1.80525 | 7.18549 | 2.4139  |
| 11.047 | 0.23884 | 7.20518 | 0.01642 | 7.20518 | 0.60694 | 7.20518 | 1.2045  | 7.20518 | 1.80724 | 7.20518 | 2.40934 |
| 11.147 | 0.23896 | 7.22487 | 0.01466 | 7.22487 | 0.61303 | 7.22487 | 1.21011 | 7.22487 | 1.80979 | 7.22487 | 2.4126  |
| 11.247 | 0.23867 | 7.24456 | 0.01498 | 7.24456 | 0.60967 | 7.24456 | 1.2089  | 7.24456 | 1.80528 | 7.24456 | 2.40682 |
| 11.347 | 0.2387  | 7.26425 | 0.01582 | 7.26425 | 0.61714 | 7.26425 | 1.20543 | 7.26425 | 1.81301 | 7.26425 | 2.41778 |
| 11.447 | 0.23876 | 7.28394 | 0.00712 | 7.28394 | 0.61303 | 7.28394 | 1.20025 | 7.28394 | 1.80275 | 7.28394 | 2.40625 |
| 11.547 | 0.23884 | 7.30363 | 0.00543 | 7.30363 | 0.60879 | 7.30363 | 1.20281 | 7.30363 | 1.80886 | 7.30363 | 2.40545 |
| 11.647 | 0.23822 | 7.32331 | 0.01437 | 7.32331 | 0.60956 | 7.32331 | 1.21023 | 7.32331 | 1.81122 | 7.32331 | 2.40798 |
| 11.747 | 0.23809 | 7.343   | 0.00788 | 7.343   | 0.6109  | 7.343   | 1.20768 | 7.343   | 1.80377 | 7.343   | 2.40633 |
| 11.847 | 0.2383  | 7.36269 | 0.01066 | 7.36269 | 0.60961 | 7.36269 | 1.20338 | 7.36269 | 1.81132 | 7.36269 | 2.40783 |
| 11.947 | 0.23797 | 7.38238 | 0.01785 | 7.38238 | 0.60762 | 7.38238 | 1.20683 | 7.38238 | 1.79893 | 7.38238 | 2.40733 |
| 12.047 | 0.23797 | 7.40207 | 0.0135  | 7.40207 | 0.61165 | 7.40207 | 1.21626 | 7.40207 | 1.80273 | 7.40207 | 2.40199 |
| 12.147 | 0.23807 | 7.42176 | 0.01388 | 7.42176 | 0.6133  | 7.42176 | 1.20798 | 7.42176 | 1.81072 | 7.42176 | 2.40785 |
| 12.247 | 0.23796 | 7.44145 | 0.0092  | 7.44145 | 0.60944 | 7.44145 | 1.20445 | 7.44145 | 1.80489 | 7.44145 | 2.41087 |
| 12.347 | 0.23778 | 7.46114 | 0.00913 | 7.46114 | 0.6032  | 7.46114 | 1.20975 | 7.46114 | 1.80494 | 7.46114 | 2.40425 |
| 12.447 | 0.23721 | 7.48083 | 0.01341 | 7.48083 | 0.60873 | 7.48083 | 1.20793 | 7.48083 | 1.79949 | 7.48083 | 2.40205 |
| 12.547 | 0.23743 | 7.50052 | 0.00575 | 7.50052 | 0.60456 | 7.50052 | 1.20585 | 7.50052 | 1.80441 | 7.50052 | 2.4041  |

|        |         |         |           |         |         |         |         |         |         |         |         |
|--------|---------|---------|-----------|---------|---------|---------|---------|---------|---------|---------|---------|
| 12.647 | 0.23758 | 7.5202  | 0.01047   | 7.5202  | 0.60834 | 7.5202  | 1.20573 | 7.5202  | 1.7959  | 7.5202  | 2.40839 |
| 12.747 | 0.23785 | 7.53989 | 0.00392   | 7.53989 | 0.60742 | 7.53989 | 1.2006  | 7.53989 | 1.80639 | 7.53989 | 2.41353 |
| 12.847 | 0.2376  | 7.55958 | 0.00825   | 7.55958 | 0.61182 | 7.55958 | 1.20419 | 7.55958 | 1.8     | 7.55958 | 2.4     |
| 12.947 | 0.23756 | 7.57927 | 0.00974   | 7.57927 | 0.6109  | 7.57927 | 1.20774 | 7.57927 | 1.79574 | 7.57927 | 2.4115  |
| 13.047 | 0.23761 | 7.59896 | 0.01038   | 7.59896 | 0.60986 | 7.59896 | 1.20494 | 7.59896 | 1.80635 | 7.59896 | 2.40609 |
| 13.147 | 0.23753 | 7.61865 | 0.00888   | 7.61865 | 0.60675 | 7.61865 | 1.20853 | 7.61865 | 1.80146 | 7.61865 | 2.40601 |
| 13.247 | 0.2378  | 7.63834 | 0.00609   | 7.63834 | 0.60271 | 7.63834 | 1.20232 | 7.63834 | 1.80113 | 7.63834 | 2.40291 |
| 13.347 | 0.23767 | 7.65803 | 0.00679   | 7.65803 | 0.60673 | 7.65803 | 1.20742 | 7.65803 | 1.80511 | 7.65803 | 2.39907 |
| 13.447 | 0.23744 | 7.67772 | 0.00147   | 7.67772 | 0.60876 | 7.67772 | 1.20224 | 7.67772 | 1.80304 | 7.67772 | 2.40184 |
| 13.547 | 0.23785 | 7.69741 | 0.0097    | 7.69741 | 0.60308 | 7.69741 | 1.20377 | 7.69741 | 1.80096 | 7.69741 | 2.40389 |
| 13.647 | 0.23773 | 7.7171  | 0.01131   | 7.7171  | 0.60905 | 7.7171  | 1.21062 | 7.7171  | 1.8057  | 7.7171  | 2.40381 |
| 13.747 | 0.23753 | 7.73679 | 0.00618   | 7.73679 | 0.61151 | 7.73679 | 1.20487 | 7.73679 | 1.80237 | 7.73679 | 2.40416 |
| 13.847 | 0.23769 | 7.75647 | 0.0052    | 7.75647 | 0.60959 | 7.75647 | 1.2     | 7.75647 | 1.80567 | 7.75647 | 2.40578 |
| 13.947 | 0.23796 | 7.77616 | 0.01213   | 7.77616 | 0.60498 | 7.77616 | 1.20265 | 7.77616 | 1.80515 | 7.77616 | 2.40231 |
| 14.047 | 0.23796 | 7.79585 | 0.00713   | 7.79585 | 0.60845 | 7.79585 | 1.20117 | 7.79585 | 1.79895 | 7.79585 | 2.40436 |
| 14.147 | 0.23808 | 7.81554 | 0.00252   | 7.81554 | 0.60865 | 7.81554 | 1.20155 | 7.81554 | 1.80343 | 7.81554 | 2.39483 |
| 14.247 | 0.23794 | 7.83523 | 0.00511   | 7.83523 | 0.60818 | 7.83523 | 1.20472 | 7.83523 | 1.80336 | 7.83523 | 2.40287 |
| 14.347 | 0.23789 | 7.85492 | -0.00164  | 7.85492 | 0.60357 | 7.85492 | 1.20908 | 7.85492 | 1.80503 | 7.85492 | 2.40189 |
| 14.447 | 0.23812 | 7.87461 | 0.00918   | 7.87461 | 0.60959 | 7.87461 | 1.20868 | 7.87461 | 1.80095 | 7.87461 | 2.3986  |
| 14.547 | 0.23822 | 7.8943  | 0.00113   | 7.8943  | 0.60661 | 7.8943  | 1.20963 | 7.8943  | 1.801   | 7.8943  | 2.40319 |
| 14.647 | 0.23838 | 7.91399 | 0.00502   | 7.91399 | 0.60382 | 7.91399 | 1.20743 | 7.91399 | 1.80436 | 7.91399 | 2.4059  |
| 14.747 | 0.23872 | 7.93368 | 7.31E-04  | 7.93368 | 0.60384 | 7.93368 | 1.20492 | 7.93368 | 1.79972 | 7.93368 | 2.40437 |
| 14.847 | 0.23839 | 7.95336 | 0.00306   | 7.95336 | 0.60655 | 7.95336 | 1.20323 | 7.95336 | 1.80015 | 7.95336 | 2.4035  |
| 14.947 | 0.23852 | 7.97305 | 0.00143   | 7.97305 | 0.60908 | 7.97305 | 1.20552 | 7.97305 | 1.79713 | 7.97305 | 2.40294 |
| 15.047 | 0.23865 | 7.99274 | 0.00512   | 7.99274 | 0.60979 | 7.99274 | 1.20466 | 7.99274 | 1.79574 | 7.99274 | 2.39947 |
| 15.147 | 0.23884 | 8.01243 | 0.00109   | 8.01243 | 0.61237 | 8.01243 | 1.19998 | 8.01243 | 1.80279 | 8.01243 | 2.40237 |
| 15.247 | 0.23914 | 8.03212 | -6.65E-04 | 8.03212 | 0.61133 | 8.03212 | 1.19825 | 8.03212 | 1.80371 | 8.03212 | 2.40532 |
| 15.347 | 0.23922 | 8.05181 | 0.00419   | 8.05181 | 0.6173  | 8.05181 | 1.1977  | 8.05181 | 1.79864 | 8.05181 | 2.39954 |
| 15.447 | 0.23891 | 8.0715  | -0.00159  | 8.0715  | 0.62258 | 8.0715  | 1.20897 | 8.0715  | 1.80268 | 8.0715  | 2.39789 |
| 15.547 | 0.2387  | 8.09119 | 0.00502   | 8.09119 | 0.62735 | 8.09119 | 1.19861 | 8.09119 | 1.80411 | 8.09119 | 2.40588 |
| 15.647 | 0.2386  | 8.11088 | 0.00696   | 8.11088 | 0.63858 | 8.11088 | 1.20126 | 8.11088 | 1.80803 | 8.11088 | 2.40477 |
| 15.747 | 0.23871 | 8.13057 | 0.00793   | 8.13057 | 0.64942 | 8.13057 | 1.19777 | 8.13057 | 1.80495 | 8.13057 | 2.40197 |
| 15.847 | 0.239   | 8.15026 | 0.01687   | 8.15026 | 0.65983 | 8.15026 | 1.2045  | 8.15026 | 1.81    | 8.15026 | 2.40013 |
| 15.947 | 0.23881 | 8.16995 | 0.02192   | 8.16995 | 0.67262 | 8.16995 | 1.20566 | 8.16995 | 1.81567 | 8.16995 | 2.40612 |
| 16.047 | 0.239   | 8.18963 | 0.0236    | 8.18963 | 0.68741 | 8.18963 | 1.20464 | 8.18963 | 1.82053 | 8.18963 | 2.40786 |
| 16.147 | 0.23915 | 8.20932 | 0.0341    | 8.20932 | 0.70589 | 8.20932 | 1.20673 | 8.20932 | 1.82233 | 8.20932 | 2.41233 |
| 16.247 | 0.23902 | 8.22901 | 0.042     | 8.22901 | 0.72106 | 8.22901 | 1.20664 | 8.22901 | 1.837   | 8.22901 | 2.40765 |
| 16.347 | 0.23947 | 8.2487  | 0.05568   | 8.2487  | 0.74755 | 8.2487  | 1.21002 | 8.2487  | 1.8398  | 8.2487  | 2.41108 |
| 16.447 | 0.23933 | 8.26839 | 0.0604    | 8.26839 | 0.75258 | 8.26839 | 1.21344 | 8.26839 | 1.83922 | 8.26839 | 2.42083 |
| 16.547 | 0.23936 | 8.28808 | 0.07434   | 8.28808 | 0.76768 | 8.28808 | 1.21563 | 8.28808 | 1.83614 | 8.28808 | 2.41414 |
| 16.647 | 0.23955 | 8.30777 | 0.08568   | 8.30777 | 0.75419 | 8.30777 | 1.21451 | 8.30777 | 1.82494 | 8.30777 | 2.42534 |
| 16.747 | 0.23943 | 8.32746 | 0.08807   | 8.32746 | 0.71385 | 8.32746 | 1.21397 | 8.32746 | 1.81799 | 8.32746 | 2.42248 |
| 16.847 | 0.23972 | 8.34715 | 0.08807   | 8.34715 | 0.67864 | 8.34715 | 1.21305 | 8.34715 | 1.81873 | 8.34715 | 2.43167 |
| 16.947 | 0.23978 | 8.36684 | 0.0819    | 8.36684 | 0.64868 | 8.36684 | 1.20755 | 8.36684 | 1.80928 | 8.36684 | 2.42105 |

|        |         |         |           |         |         |         |         |         |         |         |         |
|--------|---------|---------|-----------|---------|---------|---------|---------|---------|---------|---------|---------|
| 17.047 | 0.23957 | 8.38653 | 0.0531    | 8.38653 | 0.63143 | 8.38653 | 1.20529 | 8.38653 | 1.80276 | 8.38653 | 2.41619 |
| 17.147 | 0.2399  | 8.40621 | 0.04071   | 8.40621 | 0.60724 | 8.40621 | 1.20542 | 8.40621 | 1.80356 | 8.40621 | 2.42332 |
| 17.247 | 0.23994 | 8.4259  | 0.02663   | 8.4259  | 0.60457 | 8.4259  | 1.19996 | 8.4259  | 1.80486 | 8.4259  | 2.40973 |
| 17.347 | 0.23967 | 8.44559 | 0.00568   | 8.44559 | 0.60728 | 8.44559 | 1.20215 | 8.44559 | 1.80578 | 8.44559 | 2.41129 |
| 17.447 | 0.23982 | 8.46528 | 0.0071    | 8.46528 | 0.60042 | 8.46528 | 1.19928 | 8.46528 | 1.80464 | 8.46528 | 2.4043  |
| 17.547 | 0.23975 | 8.48497 | 0.00352   | 8.48497 | 0.60482 | 8.48497 | 1.19707 | 8.48497 | 1.80806 | 8.48497 | 2.40441 |
| 17.647 | 0.24006 | 8.50466 | 0.00248   | 8.50466 | 0.59777 | 8.50466 | 1.2021  | 8.50466 | 1.80624 | 8.50466 | 2.40191 |
| 17.747 | 0.24022 | 8.52435 | 0.00519   | 8.52435 | 0.60643 | 8.52435 | 1.20227 | 8.52435 | 1.80322 | 8.52435 | 2.4002  |
| 17.847 | 0.24037 | 8.54404 | 0         | 8.54404 | 0.60301 | 8.54404 | 1.20002 | 8.54404 | 1.80233 | 8.54404 | 2.4     |
| 17.947 | 0.24038 | 8.56373 | 0.00382   | 8.56373 | 0.59965 | 8.56373 | 1.20159 | 8.56373 | 1.79919 | 8.56373 | 2.40476 |
| 18.047 | 0.24021 | 8.58342 | -3.29E-04 | 8.58342 | 0.60524 | 8.58342 | 1.19779 | 8.58342 | 1.80143 | 8.58342 | 2.40218 |
| 18.147 | 0.24002 | 8.60311 | -0.00455  | 8.60311 | 0.59732 | 8.60311 | 1.19817 | 8.60311 | 1.8016  | 8.60311 | 2.39954 |
| 18.247 | 0.24035 | 8.62279 | -0.00137  | 8.62279 | 0.6046  | 8.62279 | 1.2004  | 8.62279 | 1.80165 | 8.62279 | 2.40472 |
| 18.347 | 0.2403  | 8.64248 | -0.00144  | 8.64248 | 0.6013  | 8.64248 | 1.19511 | 8.64248 | 1.80176 | 8.64248 | 2.40487 |
| 18.447 | 0.24025 | 8.66217 | 0.00271   | 8.66217 | 0.60376 | 8.66217 | 1.19941 | 8.66217 | 1.80425 | 8.66217 | 2.39563 |
| 18.547 | 0.24041 | 8.68186 | -0.00397  | 8.68186 | 0.60128 | 8.68186 | 1.19969 | 8.68186 | 1.79686 | 8.68186 | 2.40269 |
| 18.647 | 0.24058 | 8.70155 | -2.12E-04 | 8.70155 | 0.59817 | 8.70155 | 1.20626 | 8.70155 | 1.80522 | 8.70155 | 2.39866 |
| 18.747 | 0.2404  | 8.72124 | -0.00216  | 8.72124 | 0.60427 | 8.72124 | 1.2004  | 8.72124 | 1.79989 | 8.72124 | 2.40232 |
| 18.847 | 0.24051 | 8.74093 | 0.00225   | 8.74093 | 0.60166 | 8.74093 | 1.2     | 8.74093 | 1.8     | 8.74093 | 2.40126 |
| 18.947 | 0.24038 | 8.76062 | 6.25E-04  | 8.76062 | 0.60049 | 8.76062 | 1.19745 | 8.76062 | 1.80501 | 8.76062 | 2.39905 |
| 19.047 | 0.24047 | 8.78031 | 8.82E-04  | 8.78031 | 0.60396 | 8.78031 | 1.1998  | 8.78031 | 1.80715 | 8.78031 | 2.40417 |
| 19.147 | 0.24036 | 8.8     | 0.00308   | 8.8     | 0.60429 | 8.8     | 1.20324 | 8.8     | 1.80254 | 8.8     | 2.39559 |
| 19.247 | 0.24059 | 8.81968 | -0.00353  | 8.81968 | 0.60619 | 8.81968 | 1.20085 | 8.81968 | 1.80662 | 8.81968 | 2.39889 |
| 19.347 | 0.24064 | 8.83938 | -0.00315  | 8.83938 | 0.60458 | 8.83938 | 1.20269 | 8.83938 | 1.80776 | 8.83938 | 2.40243 |
| 19.447 | 0.24052 | 8.85906 | -0.0047   | 8.85906 | 0.60767 | 8.85906 | 1.20287 | 8.85906 | 1.8024  | 8.85906 | 2.40143 |
| 19.547 | 0.24045 | 8.87875 | -0.00717  | 8.87875 | 0.60519 | 8.87875 | 1.19743 | 8.87875 | 1.8086  | 8.87875 | 2.39389 |
| 19.647 | 0.24058 | 8.89844 | -0.00776  | 8.89844 | 0.60621 | 8.89844 | 1.1986  | 8.89844 | 1.80505 | 8.89844 | 2.39955 |
| 19.747 | 0.24015 | 8.91813 | 0.00152   | 8.91813 | 0.60811 | 8.91813 | 1.19651 | 8.91813 | 1.80362 | 8.91813 | 2.40304 |
| 19.847 | 0.24052 | 8.93782 | 5.40E-04  | 8.93782 | 0.6     | 8.93782 | 1.20449 | 8.93782 | 1.80451 | 8.93782 | 2.40125 |
| 19.947 | 0.24065 | 8.95751 | -0.00536  | 8.95751 | 0.60501 | 8.95751 | 1.19631 | 8.95751 | 1.80803 | 8.95751 | 2.40097 |
| 20.047 | 0.2409  | 8.9772  | -0.00588  | 8.9772  | 0.60295 | 8.9772  | 1.20218 | 8.9772  | 1.8011  | 8.9772  | 2.40264 |
| 20.147 | 0.241   | 8.99689 | -0.00154  | 8.99689 | 0.60164 | 8.99689 | 1.20092 | 8.99689 | 1.8043  | 8.99689 | 2.40206 |
| 20.247 | 0.24098 | 9.01658 | 0.00222   | 9.01658 | 0.60684 | 9.01658 | 1.19889 | 9.01658 | 1.80163 | 9.01658 | 2.40524 |
| 20.347 | 0.24083 | 9.03627 | 0.00241   | 9.03627 | 0.60396 | 9.03627 | 1.19948 | 9.03627 | 1.80527 | 9.03627 | 2.40133 |
| 20.447 | 0.24105 | 9.05596 | -0.00317  | 9.05596 | 0.60422 | 9.05596 | 1.19941 | 9.05596 | 1.80447 | 9.05596 | 2.40136 |
| 20.547 | 0.24139 | 9.07564 | -3.83E-04 | 9.07564 | 0.60147 | 9.07564 | 1.198   | 9.07564 | 1.80236 | 9.07564 | 2.40339 |
| 20.647 | 0.24151 | 9.09533 | -0.00272  | 9.09533 | 0.60673 | 9.09533 | 1.20247 | 9.09533 | 1.80037 | 9.09533 | 2.40184 |
| 20.747 | 0.24158 | 9.11502 | -0.0022   | 9.11502 | 0.60642 | 9.11502 | 1.20172 | 9.11502 | 1.80495 | 9.11502 | 2.40454 |
| 20.847 | 0.24165 | 9.13471 | 0.00279   | 9.13471 | 0.60724 | 9.13471 | 1.20021 | 9.13471 | 1.80659 | 9.13471 | 2.40184 |
| 20.947 | 0.24165 | 9.1544  | 0.00421   | 9.1544  | 0.60055 | 9.1544  | 1.20029 | 9.1544  | 1.80298 | 9.1544  | 2.40084 |
| 21.047 | 0.24166 | 9.17409 | -0.00124  | 9.17409 | 0.60124 | 9.17409 | 1.19831 | 9.17409 | 1.80524 | 9.17409 | 2.39717 |
| 21.147 | 0.24139 | 9.19378 | 5.77E-04  | 9.19378 | 0.60143 | 9.19378 | 1.19663 | 9.19378 | 1.80463 | 9.19378 | 2.39993 |
| 21.247 | 0.24158 | 9.21347 | 7.05E-04  | 9.21347 | 0.60438 | 9.21347 | 1.19636 | 9.21347 | 1.80014 | 9.21347 | 2.40098 |
| 21.347 | 0.24195 | 9.23316 | -0.00338  | 9.23316 | 0.6035  | 9.23316 | 1.20744 | 9.23316 | 1.80241 | 9.23316 | 2.39823 |

|        |         |          |           |          |         |          |         |         |         |          |         |
|--------|---------|----------|-----------|----------|---------|----------|---------|---------|---------|----------|---------|
| 21.447 | 0.24218 | 9.25285  | 0.00693   | 9.25285  | 0.60107 | 9.25285  | 1.20421 | 9.25285 | 1.79892 | 9.25285  | 2.40407 |
| 21.547 | 0.24196 | 9.27253  | -1.45E-04 | 9.27253  | 0.6002  | 9.27253  | 1.19908 | 9.27253 | 1.80368 | 9.27253  | 2.40065 |
| 21.647 | 0.24192 | 9.29222  | -0.00709  | 9.29222  | 0.60665 | 9.29222  | 1.19746 | 9.29222 | 1.80014 | 9.29222  | 2.39662 |
| 21.747 | 0.24242 | 9.31191  | -0.00151  | 9.31191  | 0.6064  | 9.31191  | 1.2058  | 9.31191 | 1.79884 | 9.31191  | 2.39416 |
| 21.847 | 0.24234 | 9.3316   | 0.00439   | 9.3316   | 0.60265 | 9.3316   | 1.2     | 9.3316  | 1.80029 | 9.3316   | 2.40092 |
| 21.947 | 0.24231 | 9.35129  | 0.00186   | 9.35129  | 0.60071 | 9.35129  | 1.2027  | 9.35129 | 1.8008  | 9.35129  | 2.39822 |
| 22.047 | 0.24224 | 9.37098  | 0.00108   | 9.37098  | 0.60547 | 9.37098  | 1.2006  | 9.37098 | 1.8015  | 9.37098  | 2.40037 |
| 22.147 | 0.24228 | 9.39067  | -0.00807  | 9.39067  | 0.60542 | 9.39067  | 1.20464 | 9.39067 | 1.8017  | 9.39067  | 2.39646 |
| 22.247 | 0.24278 | 9.41036  | 5.53E-04  | 9.41036  | 0.60217 | 9.41036  | 1.19954 | 9.41036 | 1.80578 | 9.41036  | 2.39982 |
| 22.347 | 0.24291 | 9.43005  | 0.00587   | 9.43005  | 0.60117 | 9.43005  | 1.20063 | 9.43005 | 1.81185 | 9.43005  | 2.40155 |
| 22.447 | 0.24291 | 9.44974  | 0.00768   | 9.44974  | 0.60399 | 9.44974  | 1.2007  | 9.44974 | 1.80806 | 9.44974  | 2.40012 |
| 22.547 | 0.24315 | 9.46943  | -2.31E-04 | 9.46943  | 0.60218 | 9.46943  | 1.19942 | 9.46943 | 1.81051 | 9.46943  | 2.40148 |
| 22.647 | 0.24311 | 9.48912  | 9.34E-04  | 9.48912  | 0.60512 | 9.48912  | 1.19758 | 9.48912 | 1.80027 | 9.48912  | 2.39739 |
| 22.747 | 0.24323 | 9.5088   | 0.00372   | 9.5088   | 0.60087 | 9.5088   | 1.19899 | 9.5088  | 1.80397 | 9.5088   | 2.39815 |
| 22.847 | 0.24337 | 9.52849  | 0.00171   | 9.52849  | 0.60663 | 9.52849  | 1.20081 | 9.52849 | 1.80686 | 9.52849  | 2.40296 |
| 22.947 | 0.24301 | 9.54818  | -6.94E-04 | 9.54818  | 0.60457 | 9.54818  | 1.20185 | 9.54818 | 1.79919 | 9.54818  | 2.39796 |
| 23.047 | 0.24331 | 9.56787  | -0.00154  | 9.56787  | 0.60558 | 9.56787  | 1.20336 | 9.56787 | 1.80189 | 9.56787  | 2.39635 |
| 23.147 | 0.2434  | 9.58756  | 0.003     | 9.58756  | 0.60539 | 9.58756  | 1.19837 | 9.58756 | 1.80709 | 9.58756  | 2.3985  |
| 23.247 | 0.24358 | 9.60725  | 0.00319   | 9.60725  | 0.60296 | 9.60725  | 1.19988 | 9.60725 | 1.80123 | 9.60725  | 2.3989  |
| 23.347 | 0.24368 | 9.62694  | 0.0041    | 9.62694  | 0.60534 | 9.62694  | 1.19999 | 9.62694 | 1.80362 | 9.62694  | 2.39905 |
| 23.447 | 0.24383 | 9.64663  | -0.00168  | 9.64663  | 0.60215 | 9.64663  | 1.20228 | 9.64663 | 1.80313 | 9.64663  | 2.40108 |
| 23.547 | 0.24392 | 9.66632  | 0.00182   | 9.66632  | 0.60184 | 9.66632  | 1.20054 | 9.66632 | 1.80558 | 9.66632  | 2.40177 |
| 23.647 | 0.24415 | 9.68601  | 0.00357   | 9.68601  | 0.60304 | 9.68601  | 1.2022  | 9.68601 | 1.79903 | 9.68601  | 2.40059 |
| 23.747 | 0.24404 | 9.7057   | 0.00772   | 9.7057   | 0.60379 | 9.7057   | 1.20072 | 9.7057  | 1.80236 | 9.7057   | 2.40128 |
| 23.847 | 0.24418 | 9.72538  | 0         | 9.72538  | 0.6006  | 9.72538  | 1.20213 | 9.72538 | 1.8     | 9.72538  | 2.4004  |
| 23.947 | 0.24424 | 9.74507  | 0.00454   | 9.74507  | 0.59992 | 9.74507  | 1.19884 | 9.74507 | 1.80723 | 9.74507  | 2.40086 |
| 24.047 | 0.24429 | 9.76476  | -0.00136  | 9.76476  | 0.60431 | 9.76476  | 1.19911 | 9.76476 | 1.80328 | 9.76476  | 2.39707 |
| 24.147 | 0.24425 | 9.78445  | 0.00285   | 9.78445  | 0.60325 | 9.78445  | 1.20206 | 9.78445 | 1.80851 | 9.78445  | 2.40079 |
| 24.247 | 0.24451 | 9.80414  | -0.00285  | 9.80414  | 0.60162 | 9.80414  | 1.20363 | 9.80414 | 1.80024 | 9.80414  | 2.39876 |
| 24.347 | 0.24483 | 9.82383  | 0.00266   | 9.82383  | 0.59919 | 9.82383  | 1.19982 | 9.82383 | 1.80179 | 9.82383  | 2.39849 |
| 24.447 | 0.24476 | 9.84352  | 0.00752   | 9.84352  | 0.60482 | 9.84352  | 1.20334 | 9.84352 | 1.79996 | 9.84352  | 2.39888 |
| 24.547 | 0.24522 | 9.86321  | 0.00357   | 9.86321  | 0.60414 | 9.86321  | 1.20238 | 9.86321 | 1.80344 | 9.86321  | 2.39849 |
| 24.647 | 0.245   | 9.8829   | 4.54E-04  | 9.8829   | 0.6002  | 9.8829   | 1.20017 | 9.8829  | 1.80649 | 9.8829   | 2.40039 |
| 24.747 | 0.24494 | 9.90259  | 0.00208   | 9.90259  | 0.60778 | 9.90259  | 1.20524 | 9.90259 | 1.80916 | 9.90259  | 2.39969 |
| 24.847 | 0.24532 | 9.92228  | 0.00169   | 9.92228  | 0.60528 | 9.92228  | 1.20133 | 9.92228 | 1.8077  | 9.92228  | 2.40239 |
| 24.947 | 0.24554 | 9.94196  | 0.00292   | 9.94196  | 0.60178 | 9.94196  | 1.20326 | 9.94196 | 1.80281 | 9.94196  | 2.39781 |
| 25.047 | 0.24565 | 9.96165  | 5.19E-04  | 9.96165  | 0.60785 | 9.96165  | 1.19909 | 9.96165 | 1.79979 | 9.96165  | 2.40469 |
| 25.147 | 0.24549 | 9.98134  | -1.95E-04 | 9.98134  | 0.5959  | 9.98134  | 1.19735 | 9.98134 | 1.8019  | 9.98134  | 2.3989  |
| 25.247 | 0.24572 | 10.00103 | 0.00681   | 10.00103 | 0.60323 | 10.00103 | 1.20485 | 10.001  | 1.80351 | 10.00103 | 2.40051 |
| 25.347 | 0.24578 | 10.02072 | 0.0083    | 10.02072 | 0.60286 | 10.02072 | 1.20109 | 10.0207 | 1.79943 | 10.02072 | 2.39957 |
| 25.447 | 0.24565 | 10.04041 | 0.00674   | 10.04041 | 0.60205 | 10.04041 | 1.20358 | 10.0404 | 1.8046  | 10.04041 | 2.40081 |
| 25.547 | 0.24542 | 10.0601  | 0.00357   | 10.0601  | 0.60312 | 10.0601  | 1.2023  | 10.0601 | 1.80427 | 10.0601  | 2.3975  |
| 25.647 | 0.24539 | 10.07979 | -0.00383  | 10.07979 | 0.60081 | 10.07979 | 1.19984 | 10.0798 | 1.80725 | 10.07979 | 2.39935 |
| 25.747 | 0.24537 | 10.09948 | 0.00182   | 10.09948 | 0.60525 | 10.09948 | 1.1998  | 10.0995 | 1.8063  | 10.09948 | 2.40605 |



|        |         |          |           |          |         |          |         |         |         |          |         |
|--------|---------|----------|-----------|----------|---------|----------|---------|---------|---------|----------|---------|
| 25.847 | 0.24515 | 10.11917 | 0         | 10.11917 | 0.60432 | 10.11917 | 1.20229 | 10.1192 | 1.80084 | 10.11917 | 2.40056 |
| 25.947 | 0.24528 | 10.13885 | -3.40E-05 | 10.13885 | 0.60313 | 10.13885 | 1.20422 | 10.1389 | 1.8017  | 10.13885 | 2.40265 |
| 26.047 | 0.24558 | 10.15854 | 0.0059    | 10.15854 | 0.60564 | 10.15854 | 1.19927 | 10.1585 | 1.80037 | 10.15854 | 2.40128 |
| 26.147 | 0.24548 | 10.17823 | 0.00301   | 10.17823 | 0.60652 | 10.17823 | 1.20233 | 10.1782 | 1.80985 | 10.17823 | 2.39919 |
| 26.247 | 0.24533 | 10.19792 | 0.00421   | 10.19792 | 0.60621 | 10.19792 | 1.20369 | 10.1979 | 1.79909 | 10.19792 | 2.39837 |
| 26.347 | 0.24516 | 10.21761 | 0.0056    | 10.21761 | 0.60772 | 10.21761 | 1.19973 | 10.2176 | 1.79907 | 10.21761 | 2.39707 |
| 26.447 | 0.24536 | 10.2373  | 0.00472   | 10.2373  | 0.60196 | 10.2373  | 1.20036 | 10.2373 | 1.80462 | 10.2373  | 2.4014  |
| 26.547 | 0.24508 | 10.25699 | 0.00463   | 10.25699 | 0.60654 | 10.25699 | 1.20471 | 10.257  | 1.80553 | 10.25699 | 2.39658 |
| 26.647 | 0.24536 | 10.27668 | 5.06E-04  | 10.27668 | 0.60078 | 10.27668 | 1.20503 | 10.2767 | 1.80621 | 10.27668 | 2.40491 |
| 26.747 | 0.24535 | 10.29637 | 0.00585   | 10.29637 | 0.60799 | 10.29637 | 1.19957 | 10.2964 | 1.80787 | 10.29637 | 2.40046 |
| 26.847 | 0.24536 | 10.31606 | 0.00511   | 10.31606 | 0.60474 | 10.31606 | 1.2     | 10.3161 | 1.80461 | 10.31606 | 2.4     |
| 26.947 | 0.2455  | 10.33575 | 0.00812   | 10.33575 | 0.60311 | 10.33575 | 1.20158 | 10.3358 | 1.80565 | 10.33575 | 2.39738 |
| 27.047 | 0.2453  | 10.35544 | 0.00348   | 10.35544 | 0.5998  | 10.35544 | 1.20708 | 10.3554 | 1.80751 | 10.35544 | 2.40258 |
| 27.147 | 0.24523 | 10.37512 | 0.0098    | 10.37512 | 0.60118 | 10.37512 | 1.202   | 10.3751 | 1.81024 | 10.37512 | 2.40014 |
| 27.247 | 0.24539 | 10.39481 | 0.00828   | 10.39481 | 0.60582 | 10.39481 | 1.20512 | 10.3948 | 1.8001  | 10.39481 | 2.40243 |
| 27.347 | 0.24556 | 10.4145  | 7.30E-05  | 10.4145  | 0.60244 | 10.4145  | 1.20391 | 10.4145 | 1.80527 | 10.4145  | 2.4032  |
| 27.447 | 0.24562 | 10.43419 | 0.00224   | 10.43419 | 0.60338 | 10.43419 | 1.20621 | 10.4342 | 1.80419 | 10.43419 | 2.40137 |
| 27.547 | 0.24528 | 10.45388 | -3.84E-04 | 10.45388 | 0.60082 | 10.45388 | 1.19994 | 10.4539 | 1.80118 | 10.45388 | 2.40378 |
| 27.647 | 0.24556 | 10.47357 | -0.00172  | 10.47357 | 0.6012  | 10.47357 | 1.20214 | 10.4736 | 1.80722 | 10.47357 | 2.4077  |
| 27.747 | 0.24566 | 10.49326 | -9.71E-04 | 10.49326 | 0.6029  | 10.49326 | 1.20444 | 10.4933 | 1.79814 | 10.49326 | 2.41042 |
| 27.847 | 0.24545 | 10.51295 | 0.00185   | 10.51295 | 0.60547 | 10.51295 | 1.20018 | 10.513  | 1.8     | 10.51295 | 2.40295 |
| 27.947 | 0.24545 | 10.53264 | -0.0035   | 10.53264 | 0.60516 | 10.53264 | 1.19959 | 10.5326 | 1.80372 | 10.53264 | 2.4059  |
| 28.047 | 0.24565 | 10.55233 | 0.00587   | 10.55233 | 0.60153 | 10.55233 | 1.19941 | 10.5523 | 1.80575 | 10.55233 | 2.4034  |
| 28.147 | 0.24588 | 10.57202 | 0.00609   | 10.57202 | 0.60141 | 10.57202 | 1.19923 | 10.572  | 1.80472 | 10.57202 | 2.40642 |
| 28.247 | 0.24608 | 10.5917  | -0.00147  | 10.5917  | 0.59929 | 10.5917  | 1.19911 | 10.5917 | 1.80251 | 10.5917  | 2.40683 |
| 28.347 | 0.24581 | 10.61139 | 0.00395   | 10.61139 | 0.60204 | 10.61139 | 1.20058 | 10.6114 | 1.80279 | 10.61139 | 2.40887 |
| 28.447 | 0.24596 | 10.63108 | -0.00568  | 10.63108 | 0.59961 | 10.63108 | 1.20128 | 10.6311 | 1.80701 | 10.63108 | 2.41159 |
| 28.547 | 0.24603 | 10.65077 | -0.00468  | 10.65077 | 0.60174 | 10.65077 | 1.19847 | 10.6508 | 1.80641 | 10.65077 | 2.41387 |
| 28.647 | 0.24609 | 10.67046 | 0.00248   | 10.67046 | 0.60012 | 10.67046 | 1.20196 | 10.6705 | 1.80882 | 10.67046 | 2.41428 |
| 28.747 | 0.24597 | 10.69015 | 0.00524   | 10.69015 | 0.60632 | 10.69015 | 1.20204 | 10.6902 | 1.80823 | 10.69015 | 2.42154 |
| 28.847 | 0.24602 | 10.70984 | 0.00196   | 10.70984 | 0.6     | 10.70984 | 1.2     | 10.7098 | 1.80957 | 10.70984 | 2.41559 |
| 28.947 | 0.24615 | 10.72953 | 0.00115   | 10.72953 | 0.60275 | 10.72953 | 1.19418 | 10.7295 | 1.80961 | 10.72953 | 2.41382 |
| 29.047 | 0.24598 | 10.74922 | 0.00137   | 10.74922 | 0.60174 | 10.74922 | 1.19951 | 10.7492 | 1.81514 | 10.74922 | 2.41732 |
| 29.147 | 0.24623 | 10.76891 | 0.00458   | 10.76891 | 0.60236 | 10.76891 | 1.20232 | 10.7689 | 1.81467 | 10.76891 | 2.41973 |
| 29.247 | 0.24599 | 10.7886  | 0.00247   | 10.7886  | 0.60899 | 10.7886  | 1.19964 | 10.7886 | 1.80714 | 10.7886  | 2.41868 |
| 29.347 | 0.24589 | 10.80828 | -0.00223  | 10.80828 | 0.60585 | 10.80828 | 1.20358 | 10.8083 | 1.81698 | 10.80828 | 2.41782 |
| 29.447 | 0.24577 | 10.82797 | 0.00409   | 10.82797 | 0.60084 | 10.82797 | 1.20231 | 10.828  | 1.81339 | 10.82797 | 2.41974 |
| 29.547 | 0.24619 | 10.84766 | 0.00146   | 10.84766 | 0.60509 | 10.84766 | 1.2017  | 10.8477 | 1.81755 | 10.84766 | 2.41682 |
| 29.647 | 0.24633 | 10.86735 | 0.00318   | 10.86735 | 0.59801 | 10.86735 | 1.19985 | 10.8674 | 1.82008 | 10.86735 | 2.41584 |
| 29.747 | 0.24646 | 10.88704 | 0.00159   | 10.88704 | 0.6017  | 10.88704 | 1.2008  | 10.887  | 1.81224 | 10.88704 | 2.42661 |
| 29.847 | 0.24653 | 10.90673 | 0         | 10.90673 | 0.60613 | 10.90673 | 1.20686 | 10.9067 | 1.82115 | 10.90673 | 2.4335  |
| 29.947 | 0.24655 | 10.92642 | 0.00679   | 10.92642 | 0.60306 | 10.92642 | 1.2046  | 10.9264 | 1.82049 | 10.92642 | 2.43579 |
| 30.047 | 0.24628 | 10.94611 | 0.00535   | 10.94611 | 0.59886 | 10.94611 | 1.20492 | 10.9461 | 1.81796 | 10.94611 | 2.44626 |
| 30.147 | 0.2464  | 10.9658  | 5.38E-04  | 10.9658  | 0.60449 | 10.9658  | 1.20535 | 10.9658 | 1.82543 | 10.9658  | 2.45031 |

|        |         |          |           |          |         |          |         |         |         |          |         |
|--------|---------|----------|-----------|----------|---------|----------|---------|---------|---------|----------|---------|
| 30.247 | 0.24655 | 10.98549 | 0.00428   | 10.98549 | 0.6006  | 10.98549 | 1.20996 | 10.9855 | 1.82253 | 10.98549 | 2.45617 |
| 30.347 | 0.24634 | 11.00518 | 0.00401   | 11.00518 | 0.59997 | 11.00518 | 1.21018 | 11.0052 | 1.82206 | 11.00518 | 2.45804 |
| 30.447 | 0.24621 | 11.02486 | 0.00425   | 11.02486 | 0.60084 | 11.02486 | 1.20498 | 11.0249 | 1.82109 | 11.02486 | 2.46093 |
| 30.547 | 0.24606 | 11.04455 | 0.00489   | 11.04455 | 0.60434 | 11.04455 | 1.21527 | 11.0446 | 1.8205  | 11.04455 | 2.45783 |
| 30.647 | 0.24618 | 11.06424 | 0.00688   | 11.06424 | 0.60264 | 11.06424 | 1.21063 | 11.0642 | 1.81353 | 11.06424 | 2.44672 |
| 30.747 | 0.24614 | 11.08393 | 0.00641   | 11.08393 | 0.60952 | 11.08393 | 1.2075  | 11.0839 | 1.81213 | 11.08393 | 2.44258 |
| 30.847 | 0.24625 | 11.10362 | 0.00996   | 11.10362 | 0.60588 | 11.10362 | 1.20555 | 11.1036 | 1.81116 | 11.10362 | 2.43093 |
| 30.947 | 0.24622 | 11.12331 | 0.00444   | 11.12331 | 0.59999 | 11.12331 | 1.20562 | 11.1233 | 1.80676 | 11.12331 | 2.41583 |
| 31.047 | 0.24612 | 11.143   | 0.00754   | 11.143   | 0.60312 | 11.143   | 1.20811 | 11.143  | 1.8041  | 11.143   | 2.41272 |
| 31.147 | 0.24581 | 11.16269 | 0.00681   | 11.16269 | 0.60155 | 11.16269 | 1.20642 | 11.1627 | 1.8067  | 11.16269 | 2.40816 |
| 31.247 | 0.24571 | 11.18238 | -0.00436  | 11.18238 | 0.60523 | 11.18238 | 1.20855 | 11.1824 | 1.80442 | 11.18238 | 2.40742 |
| 31.347 | 0.24573 | 11.20207 | -0.00185  | 11.20207 | 0.60335 | 11.20207 | 1.19948 | 11.2021 | 1.80789 | 11.20207 | 2.40292 |
| 31.447 | 0.24586 | 11.22176 | 0.00255   | 11.22176 | 0.60447 | 11.22176 | 1.20517 | 11.2218 | 1.80105 | 11.22176 | 2.40672 |
| 31.547 | 0.24566 | 11.24144 | 0.00227   | 11.24144 | 0.60064 | 11.24144 | 1.20405 | 11.2414 | 1.80076 | 11.24144 | 2.4032  |
| 31.647 | 0.24573 | 11.26113 | 0.00563   | 11.26113 | 0.60314 | 11.26113 | 1.20122 | 11.2611 | 1.80411 | 11.26113 | 2.41033 |
| 31.747 | 0.24563 | 11.28082 | 0.00484   | 11.28082 | 0.60276 | 11.28082 | 1.20506 | 11.2808 | 1.80064 | 11.28082 | 2.40311 |
| 31.847 | 0.24536 | 11.30051 | 0.0019    | 11.30051 | 0.60638 | 11.30051 | 1.20419 | 11.3005 | 1.80036 | 11.30051 | 2.4     |
| 31.947 | 0.24531 | 11.3202  | 0.00104   | 11.3202  | 0.60431 | 11.3202  | 1.20271 | 11.3202 | 1.79952 | 11.3202  | 2.40352 |
| 32.047 | 0.24511 | 11.33989 | 0.0044    | 11.33989 | 0.60143 | 11.33989 | 1.20107 | 11.3399 | 1.80761 | 11.33989 | 2.40934 |
| 32.147 | 0.24506 | 11.35958 | 0.00251   | 11.35958 | 0.60849 | 11.35958 | 1.20212 | 11.3596 | 1.80565 | 11.35958 | 2.40819 |
| 32.247 | 0.24495 | 11.37927 | 0.00171   | 11.37927 | 0.60367 | 11.37927 | 1.19728 | 11.3793 | 1.80512 | 11.37927 | 2.40698 |
| 32.347 | 0.24477 | 11.39896 | 0.0015    | 11.39896 | 0.59747 | 11.39896 | 1.20602 | 11.399  | 1.80384 | 11.39896 | 2.4025  |
| 32.447 | 0.24469 | 11.41865 | 0.00376   | 11.41865 | 0.61016 | 11.41865 | 1.20263 | 11.4187 | 1.80031 | 11.41865 | 2.40517 |
| 32.547 | 0.24479 | 11.43834 | 0.00439   | 11.43834 | 0.60452 | 11.43834 | 1.2012  | 11.4383 | 1.80546 | 11.43834 | 2.40165 |
| 32.647 | 0.24476 | 11.45802 | 0.00664   | 11.45802 | 0.60596 | 11.45802 | 1.20354 | 11.458  | 1.80206 | 11.45802 | 2.40299 |
| 32.747 | 0.24448 | 11.47771 | 0.00241   | 11.47771 | 0.60257 | 11.47771 | 1.20438 | 11.4777 | 1.79903 | 11.47771 | 2.40444 |
| 32.847 | 0.24407 | 11.4974  | 0.00149   | 11.4974  | 0.60388 | 11.4974  | 1.2     | 11.4974 | 1.8     | 11.4974  | 2.40457 |
| 32.947 | 0.2441  | 11.51709 | 0.00122   | 11.51709 | 0.59524 | 11.51709 | 1.2024  | 11.5171 | 1.807   | 11.51709 | 2.40396 |
| 33.047 | 0.24402 | 11.53678 | 0.00256   | 11.53678 | 0.60443 | 11.53678 | 1.20372 | 11.5368 | 1.80087 | 11.53678 | 2.4093  |
| 33.147 | 0.24397 | 11.55647 | 1.49E-04  | 11.55647 | 0.60805 | 11.55647 | 1.20251 | 11.5565 | 1.80574 | 11.55647 | 2.40209 |
| 33.247 | 0.24397 | 11.57616 | 0.00441   | 11.57616 | 0.60611 | 11.57616 | 1.20352 | 11.5762 | 1.8073  | 11.57616 | 2.40518 |
| 33.347 | 0.24383 | 11.59585 | 6.38E-04  | 11.59585 | 0.60529 | 11.59585 | 1.2038  | 11.5959 | 1.80774 | 11.59585 | 2.40949 |
| 33.447 | 0.24404 | 11.61554 | 0.00451   | 11.61554 | 0.6034  | 11.61554 | 1.20068 | 11.6155 | 1.8018  | 11.61554 | 2.40652 |
| 33.547 | 0.24364 | 11.63523 | 0.00755   | 11.63523 | 0.60496 | 11.63523 | 1.20463 | 11.6352 | 1.80617 | 11.63523 | 2.41737 |
| 33.647 | 0.24368 | 11.65492 | 3.33E-04  | 11.65492 | 0.60539 | 11.65492 | 1.19955 | 11.6549 | 1.80916 | 11.65492 | 2.40762 |
| 33.747 | 0.24359 | 11.67461 | 0.00544   | 11.67461 | 0.59913 | 11.67461 | 1.20335 | 11.6746 | 1.80816 | 11.67461 | 2.4112  |
| 33.847 | 0.24343 | 11.69429 | 0.00588   | 11.69429 | 0.60188 | 11.69429 | 1.20497 | 11.6943 | 1.80635 | 11.69429 | 2.41859 |
| 33.947 | 0.24324 | 11.71398 | 0.00379   | 11.71398 | 0.59918 | 11.71398 | 1.20836 | 11.714  | 1.81297 | 11.71398 | 2.41702 |
| 34.047 | 0.24296 | 11.73367 | 0.00241   | 11.73367 | 0.60224 | 11.73367 | 1.20374 | 11.7337 | 1.81984 | 11.73367 | 2.42411 |
| 34.147 | 0.24282 | 11.75336 | -5.86E-04 | 11.75336 | 0.60267 | 11.75336 | 1.20909 | 11.7534 | 1.83127 | 11.75336 | 2.43218 |
| 34.247 | 0.24301 | 11.77305 | 0.00524   | 11.77305 | 0.60016 | 11.77305 | 1.20426 | 11.7731 | 1.84221 | 11.77305 | 2.4423  |
| 34.347 | 0.24254 | 11.79274 | 0.00172   | 11.79274 | 0.60303 | 11.79274 | 1.20362 | 11.7927 | 1.85989 | 11.79274 | 2.45642 |
| 34.447 | 0.24265 | 11.81243 | 0.00157   | 11.81243 | 0.60616 | 11.81243 | 1.20313 | 11.8124 | 1.86626 | 11.81243 | 2.46709 |
| 34.547 | 0.24268 | 11.83212 | 0.00506   | 11.83212 | 0.60384 | 11.83212 | 1.21126 | 11.8321 | 1.87432 | 11.83212 | 2.49703 |

|        |         |          |           |          |         |          |         |         |         |          |         |
|--------|---------|----------|-----------|----------|---------|----------|---------|---------|---------|----------|---------|
| 34.647 | 0.2427  | 11.85181 | -2.08E-04 | 11.85181 | 0.60208 | 11.85181 | 1.21826 | 11.8518 | 1.88319 | 11.85181 | 2.50667 |
| 34.747 | 0.24255 | 11.8715  | 0.00464   | 11.8715  | 0.59506 | 11.8715  | 1.20899 | 11.8715 | 1.899   | 11.8715  | 2.53868 |
| 34.847 | 0.24262 | 11.89118 | 0.00294   | 11.89118 | 0.6     | 11.89118 | 1.21005 | 11.8912 | 1.90812 | 11.89118 | 2.56722 |
| 34.947 | 0.24287 | 11.91087 | 0.00435   | 11.91087 | 0.60177 | 11.91087 | 1.21034 | 11.9109 | 1.90736 | 11.91087 | 2.60026 |
| 35.047 | 0.2425  | 11.93056 | 0.0044    | 11.93056 | 0.59792 | 11.93056 | 1.20877 | 11.9306 | 1.9053  | 11.93056 | 2.61899 |
| 35.147 | 0.24249 | 11.95025 | 0.00322   | 11.95025 | 0.60201 | 11.95025 | 1.20807 | 11.9503 | 1.90055 | 11.95025 | 2.66178 |
| 35.247 | 0.24262 | 11.96994 | 0.00385   | 11.96994 | 0.60322 | 11.96994 | 1.20903 | 11.9699 | 1.89736 | 11.96994 | 2.69215 |
| 35.347 | 0.24248 | 11.98963 | 0.0017    | 11.98963 | 0.59923 | 11.98963 | 1.20766 | 11.9896 | 1.88217 | 11.98963 | 2.72269 |
| 35.447 | 0.24249 | 12.00932 | 0.00155   | 12.00932 | 0.60263 | 12.00932 | 1.20242 | 12.0093 | 1.87642 | 12.00932 | 2.72082 |
| 35.547 | 0.24236 | 12.02901 | 4.54E-05  | 12.02901 | 0.60597 | 12.02901 | 1.20348 | 12.029  | 1.86655 | 12.02901 | 2.687   |
| 35.647 | 0.24218 | 12.0487  | 0.00152   | 12.0487  | 0.60499 | 12.0487  | 1.2016  | 12.0487 | 1.85274 | 12.0487  | 2.64295 |
| 35.747 | 0.24218 | 12.06839 | 0.00216   | 12.06839 | 0.60451 | 12.06839 | 1.20261 | 12.0684 | 1.8358  | 12.06839 | 2.57404 |
| 35.847 | 0.24163 | 12.08808 | 0         | 12.08808 | 0.60066 | 12.08808 | 1.2     | 12.0881 | 1.82855 | 12.08808 | 2.51198 |
| 35.947 | 0.24173 | 12.10777 | 0.00566   | 12.10777 | 0.60687 | 12.10777 | 1.20318 | 12.1078 | 1.82661 | 12.10777 | 2.4629  |
| 36.047 | 0.24143 | 12.12745 | -0.00192  | 12.12745 | 0.60483 | 12.12745 | 1.21148 | 12.1275 | 1.81443 | 12.12745 | 2.43526 |
| 36.147 | 0.24151 | 12.14714 | 0.00108   | 12.14714 | 0.60554 | 12.14714 | 1.20031 | 12.1471 | 1.80768 | 12.14714 | 2.42193 |
| 36.247 | 0.24119 | 12.16683 | 0.00187   | 12.16683 | 0.602   | 12.16683 | 1.20354 | 12.1668 | 1.80393 | 12.16683 | 2.41254 |
| 36.347 | 0.24067 | 12.18652 | 0.00247   | 12.18652 | 0.60959 | 12.18652 | 1.20735 | 12.1865 | 1.80555 | 12.18652 | 2.41279 |
| 36.447 | 0.2404  | 12.20621 | 0.00333   | 12.20621 | 0.60029 | 12.20621 | 1.2128  | 12.2062 | 1.80392 | 12.20621 | 2.41049 |
| 36.547 | 0.24026 | 12.2259  | 0.00295   | 12.2259  | 0.60431 | 12.2259  | 1.20432 | 12.2259 | 1.80192 | 12.2259  | 2.4057  |
| 36.647 | 0.24021 | 12.24559 | 0.00504   | 12.24559 | 0.60139 | 12.24559 | 1.21044 | 12.2456 | 1.80511 | 12.24559 | 2.40995 |
| 36.747 | 0.23991 | 12.26528 | -9.73E-04 | 12.26528 | 0.60461 | 12.26528 | 1.21063 | 12.2653 | 1.80642 | 12.26528 | 2.40765 |
| 36.847 | 0.23981 | 12.28497 | 0.00617   | 12.28497 | 0.60425 | 12.28497 | 1.20907 | 12.285  | 1.80455 | 12.28497 | 2.40268 |
| 36.947 | 0.23987 | 12.30466 | 0.00807   | 12.30466 | 0.6044  | 12.30466 | 1.21111 | 12.3047 | 1.80698 | 12.30466 | 2.40505 |
| 37.047 | 0.23939 | 12.32435 | 0.00821   | 12.32435 | 0.60718 | 12.32435 | 1.21636 | 12.3244 | 1.80267 | 12.32435 | 2.40051 |
| 37.147 | 0.23911 | 12.34403 | 0.00226   | 12.34403 | 0.60883 | 12.34403 | 1.21397 | 12.344  | 1.80929 | 12.34403 | 2.4033  |
| 37.247 | 0.239   | 12.36372 | 0.00176   | 12.36372 | 0.60541 | 12.36372 | 1.21323 | 12.3637 | 1.80448 | 12.36372 | 2.40216 |
| 37.347 | 0.23845 | 12.38341 | 0.00417   | 12.38341 | 0.60706 | 12.38341 | 1.21688 | 12.3834 | 1.81198 | 12.38341 | 2.40695 |
| 37.447 | 0.23871 | 12.4031  | -2.73E-05 | 12.4031  | 0.61477 | 12.4031  | 1.21681 | 12.4031 | 1.81017 | 12.4031  | 2.40198 |
| 37.547 | 0.23873 | 12.42279 | 0.00304   | 12.42279 | 0.61142 | 12.42279 | 1.22273 | 12.4228 | 1.81173 | 12.42279 | 2.40344 |
| 37.647 | 0.23849 | 12.44248 | 0.00759   | 12.44248 | 0.61707 | 12.44248 | 1.22726 | 12.4425 | 1.81042 | 12.44248 | 2.40411 |
| 37.747 | 0.23824 | 12.46217 | 0.00533   | 12.46217 | 0.61816 | 12.46217 | 1.2309  | 12.4622 | 1.81629 | 12.46217 | 2.40151 |
| 37.847 | 0.23839 | 12.48186 | 0.0093    | 12.48186 | 0.624   | 12.48186 | 1.24044 | 12.4819 | 1.81729 | 12.48186 | 2.40145 |
| 37.947 | 0.23854 | 12.50155 | 0.01107   | 12.50155 | 0.62953 | 12.50155 | 1.24646 | 12.5016 | 1.82379 | 12.50155 | 2.40321 |
| 38.047 | 0.23798 | 12.52124 | 0.00933   | 12.52124 | 0.63011 | 12.52124 | 1.26292 | 12.5212 | 1.82323 | 12.52124 | 2.40649 |
| 38.147 | 0.23803 | 12.54093 | 0.01499   | 12.54093 | 0.64409 | 12.54093 | 1.28154 | 12.5409 | 1.82311 | 12.54093 | 2.40474 |
| 38.247 | 0.23783 | 12.56061 | 0.01838   | 12.56061 | 0.65125 | 12.56061 | 1.30445 | 12.5606 | 1.83585 | 12.56061 | 2.40474 |
| 38.347 | 0.23763 | 12.5803  | 0.01865   | 12.5803  | 0.66554 | 12.5803  | 1.33464 | 12.5803 | 1.83036 | 12.5803  | 2.40335 |
| 38.447 | 0.23753 | 12.59999 | 0.02839   | 12.59999 | 0.69234 | 12.59999 | 1.37118 | 12.6    | 1.84104 | 12.59999 | 2.40209 |
| 38.547 | 0.23739 | 12.61968 | 0.02808   | 12.61968 | 0.71546 | 12.61968 | 1.39719 | 12.6197 | 1.85248 | 12.61968 | 2.40712 |
| 38.647 | 0.23739 | 12.63937 | 0.03912   | 12.63937 | 0.73782 | 12.63937 | 1.43678 | 12.6394 | 1.87435 | 12.63937 | 2.40955 |
| 38.747 | 0.23706 | 12.65906 | 0.05211   | 12.65906 | 0.76763 | 12.65906 | 1.49253 | 12.6591 | 1.90078 | 12.65906 | 2.40428 |
| 38.847 | 0.2374  | 12.67875 | 0.06373   | 12.67875 | 0.79706 | 12.67875 | 1.54213 | 12.6788 | 1.95296 | 12.67875 | 2.4115  |
| 38.947 | 0.23721 | 12.69844 | 0.08158   | 12.69844 | 0.83206 | 12.69844 | 1.61229 | 12.6984 | 2.0212  | 12.69844 | 2.40896 |

|        |         |          |         |          |         |          |         |         |         |          |         |
|--------|---------|----------|---------|----------|---------|----------|---------|---------|---------|----------|---------|
| 39.047 | 0.23693 | 12.71813 | 0.10637 | 12.71813 | 0.8886  | 12.71813 | 1.65725 | 12.7181 | 2.13212 | 12.71813 | 2.41448 |
| 39.147 | 0.23694 | 12.73782 | 0.12778 | 12.73782 | 0.93098 | 12.73782 | 1.72988 | 12.7378 | 2.24835 | 12.73782 | 2.41618 |
| 39.247 | 0.23675 | 12.75751 | 0.14868 | 12.75751 | 0.99922 | 12.75751 | 1.80469 | 12.7575 | 2.37414 | 12.75751 | 2.42861 |
| 39.347 | 0.23694 | 12.77719 | 0.18637 | 12.77719 | 1.06031 | 12.77719 | 1.90325 | 12.7772 | 2.48574 | 12.77719 | 2.43316 |
| 39.447 | 0.23682 | 12.79688 | 0.21881 | 12.79688 | 1.13437 | 12.79688 | 1.98234 | 12.7969 | 2.52386 | 12.79688 | 2.43783 |
| 39.547 | 0.23693 | 12.81657 | 0.25676 | 12.81657 | 1.22832 | 12.81657 | 2.059   | 12.8166 | 2.49537 | 12.81657 | 2.44868 |
| 39.647 | 0.23682 | 12.83626 | 0.31682 | 12.83626 | 1.28166 | 12.83626 | 2.08723 | 12.8363 | 2.35259 | 12.83626 | 2.45651 |
| 39.747 | 0.23655 | 12.85595 | 0.35808 | 12.85595 | 1.33062 | 12.85595 | 2.04456 | 12.856  | 2.18393 | 12.85595 | 2.46894 |
| 39.847 | 0.23672 | 12.87564 | 0.43338 | 12.87564 | 1.3312  | 12.87564 | 1.92681 | 12.8756 | 2.04109 | 12.87564 | 2.47894 |
| 39.947 | 0.23657 | 12.89533 | 0.48261 | 12.89533 | 1.25206 | 12.89533 | 1.72809 | 12.8953 | 1.95317 | 12.89533 | 2.49155 |
| 40.047 | 0.23662 | 12.91502 | 0.53062 | 12.91502 | 1.12292 | 12.91502 | 1.5475  | 12.915  | 1.9118  | 12.91502 | 2.50623 |
| 40.147 | 0.23671 | 12.93471 | 0.56487 | 12.93471 | 0.97883 | 12.93471 | 1.41374 | 12.9347 | 1.91393 | 12.93471 | 2.52944 |
| 40.247 | 0.23693 | 12.9544  | 0.56236 | 12.9544  | 0.85995 | 12.9544  | 1.32801 | 12.9544 | 1.90406 | 12.9544  | 2.52993 |
| 40.347 | 0.2372  | 12.97409 | 0.49416 | 12.97409 | 0.76667 | 12.97409 | 1.2873  | 12.9741 | 1.90269 | 12.97409 | 2.5477  |
| 40.447 | 0.23713 | 12.99377 | 0.3921  | 12.99377 | 0.72358 | 12.99377 | 1.26792 | 12.9938 | 1.90125 | 12.99377 | 2.56122 |
| 40.547 | 0.23724 | 13.01346 | 0.27792 | 13.01346 | 0.71021 | 13.01346 | 1.26826 | 13.0135 | 1.90351 | 13.01346 | 2.57056 |
| 40.647 | 0.23774 | 13.03315 | 0.19753 | 13.03315 | 0.70566 | 13.03315 | 1.26768 | 13.0332 | 1.8972  | 13.03315 | 2.57074 |
| 40.747 | 0.23787 | 13.05284 | 0.13218 | 13.05284 | 0.71495 | 13.05284 | 1.27024 | 13.0528 | 1.89876 | 13.05284 | 2.56978 |
| 40.847 | 0.2381  | 13.07253 | 0.12441 | 13.07253 | 0.72354 | 13.07253 | 1.27131 | 13.0725 | 1.8977  | 13.07253 | 2.54148 |
| 40.947 | 0.23796 | 13.09222 | 0.10952 | 13.09222 | 0.72632 | 13.09222 | 1.28632 | 13.0922 | 1.89183 | 13.09222 | 2.52294 |
| 41.047 | 0.23823 | 13.11191 | 0.10986 | 13.11191 | 0.73078 | 13.11191 | 1.28966 | 13.1119 | 1.8949  | 13.11191 | 2.48562 |
| 41.147 | 0.2385  | 13.1316  | 0.09904 | 13.1316  | 0.73156 | 13.1316  | 1.29532 | 13.1316 | 1.88478 | 13.1316  | 2.47187 |
| 41.247 | 0.23843 | 13.15129 | 0.09433 | 13.15129 | 0.7277  | 13.15129 | 1.31043 | 13.1513 | 1.88272 | 13.15129 | 2.45078 |
| 41.347 | 0.23869 | 13.17098 | 0.07521 | 13.17098 | 0.71201 | 13.17098 | 1.32224 | 13.171  | 1.88098 | 13.17098 | 2.43891 |
| 41.447 | 0.23865 | 13.19067 | 0.06803 | 13.19067 | 0.69151 | 13.19067 | 1.32542 | 13.1907 | 1.86636 | 13.19067 | 2.43679 |
| 41.547 | 0.23877 | 13.21035 | 0.05761 | 13.21035 | 0.68064 | 13.21035 | 1.32587 | 13.2104 | 1.86661 | 13.21035 | 2.4225  |
| 41.647 | 0.2387  | 13.23004 | 0.04427 | 13.23004 | 0.66421 | 13.23004 | 1.33536 | 13.23   | 1.86118 | 13.23004 | 2.42547 |
| 41.747 | 0.239   | 13.24973 | 0.04487 | 13.24973 | 0.64577 | 13.24973 | 1.33534 | 13.2497 | 1.85012 | 13.24973 | 2.41778 |
| 41.847 | 0.23907 | 13.26942 | 0.04307 | 13.26942 | 0.63991 | 13.26942 | 1.32489 | 13.2694 | 1.84431 | 13.26942 | 2.41639 |
| 41.947 | 0.23956 | 13.28911 | 0.03472 | 13.28911 | 0.63537 | 13.28911 | 1.32394 | 13.2891 | 1.83719 | 13.28911 | 2.41864 |
| 42.047 | 0.23951 | 13.3088  | 0.03052 | 13.3088  | 0.63576 | 13.3088  | 1.30942 | 13.3088 | 1.83351 | 13.3088  | 2.41932 |
| 42.147 | 0.23977 | 13.32849 | 0.03994 | 13.32849 | 0.62834 | 13.32849 | 1.30346 | 13.3285 | 1.83052 | 13.32849 | 2.41271 |
| 42.247 | 0.23999 | 13.34818 | 0.03898 | 13.34818 | 0.62573 | 13.34818 | 1.2847  | 13.3482 | 1.82252 | 13.34818 | 2.41569 |
| 42.347 | 0.23993 | 13.36787 | 0.03453 | 13.36787 | 0.62307 | 13.36787 | 1.27234 | 13.3679 | 1.82128 | 13.36787 | 2.41467 |
| 42.447 | 0.24018 | 13.38756 | 0.02728 | 13.38756 | 0.61927 | 13.38756 | 1.25694 | 13.3876 | 1.81322 | 13.38756 | 2.41043 |
| 42.547 | 0.24022 | 13.40725 | 0.02555 | 13.40725 | 0.61717 | 13.40725 | 1.24664 | 13.4073 | 1.8226  | 13.40725 | 2.41153 |
| 42.647 | 0.24036 | 13.42694 | 0.02355 | 13.42694 | 0.61606 | 13.42694 | 1.24146 | 13.4269 | 1.81835 | 13.42694 | 2.40826 |
| 42.747 | 0.2406  | 13.44662 | 0.0215  | 13.44662 | 0.6082  | 13.44662 | 1.23437 | 13.4466 | 1.81898 | 13.44662 | 2.41579 |
| 42.847 | 0.24108 | 13.46631 | 0.01127 | 13.46631 | 0.61267 | 13.46631 | 1.23079 | 13.4663 | 1.81349 | 13.46631 | 2.41706 |
| 42.947 | 0.24138 | 13.486   | 0.01109 | 13.486   | 0.61069 | 13.486   | 1.22561 | 13.486  | 1.81693 | 13.486   | 2.41519 |
| 43.047 | 0.24131 | 13.50569 | 0.00579 | 13.50569 | 0.60552 | 13.50569 | 1.22193 | 13.5057 | 1.82325 | 13.50569 | 2.42514 |
| 43.147 | 0.24166 | 13.52538 | 0.00892 | 13.52538 | 0.60216 | 13.52538 | 1.2186  | 13.5254 | 1.82269 | 13.52538 | 2.42854 |
| 43.247 | 0.2416  | 13.54507 | 0.00407 | 13.54507 | 0.60988 | 13.54507 | 1.21761 | 13.5451 | 1.82338 | 13.54507 | 2.43273 |
| 43.347 | 0.2418  | 13.56476 | 0.00137 | 13.56476 | 0.60095 | 13.56476 | 1.2132  | 13.5648 | 1.83882 | 13.56476 | 2.43716 |

|        |         |          |           |          |         |          |         |         |         |          |         |
|--------|---------|----------|-----------|----------|---------|----------|---------|---------|---------|----------|---------|
| 43.447 | 0.24214 | 13.58445 | 0.00145   | 13.58445 | 0.60529 | 13.58445 | 1.21261 | 13.5845 | 1.83933 | 13.58445 | 2.45135 |
| 43.547 | 0.24223 | 13.60414 | 0.00263   | 13.60414 | 0.60494 | 13.60414 | 1.21141 | 13.6041 | 1.84633 | 13.60414 | 2.45972 |
| 43.647 | 0.24277 | 13.62383 | 0.00674   | 13.62383 | 0.60478 | 13.62383 | 1.21155 | 13.6238 | 1.85784 | 13.62383 | 2.47482 |
| 43.747 | 0.24288 | 13.64351 | 0.00526   | 13.64351 | 0.60655 | 13.64351 | 1.21029 | 13.6435 | 1.87009 | 13.64351 | 2.49095 |
| 43.847 | 0.24311 | 13.6632  | 0.00437   | 13.6632  | 0.6062  | 13.6632  | 1.20805 | 13.6632 | 1.87291 | 13.6632  | 2.49556 |
| 43.947 | 0.24356 | 13.68289 | 0.00238   | 13.68289 | 0.60497 | 13.68289 | 1.20654 | 13.6829 | 1.88566 | 13.68289 | 2.50926 |
| 44.047 | 0.24395 | 13.70258 | -0.00117  | 13.70258 | 0.60449 | 13.70258 | 1.20275 | 13.7026 | 1.89554 | 13.70258 | 2.51721 |
| 44.147 | 0.24387 | 13.72227 | 0.00255   | 13.72227 | 0.60633 | 13.72227 | 1.20723 | 13.7223 | 1.89036 | 13.72227 | 2.52752 |
| 44.247 | 0.24402 | 13.74196 | 0.00211   | 13.74196 | 0.6046  | 13.74196 | 1.20329 | 13.742  | 1.89105 | 13.74196 | 2.54535 |
| 44.347 | 0.24418 | 13.76165 | 8.97E-04  | 13.76165 | 0.59818 | 13.76165 | 1.20668 | 13.7617 | 1.89081 | 13.76165 | 2.55359 |
| 44.447 | 0.24452 | 13.78134 | 0.00202   | 13.78134 | 0.6064  | 13.78134 | 1.2079  | 13.7813 | 1.88375 | 13.78134 | 2.56409 |
| 44.547 | 0.24485 | 13.80103 | 0.00333   | 13.80103 | 0.60342 | 13.80103 | 1.20246 | 13.801  | 1.8712  | 13.80103 | 2.56167 |
| 44.647 | 0.24512 | 13.82072 | 0.00102   | 13.82072 | 0.60156 | 13.82072 | 1.20554 | 13.8207 | 1.86714 | 13.82072 | 2.55852 |
| 44.747 | 0.24514 | 13.84041 | -0.0026   | 13.84041 | 0.60446 | 13.84041 | 1.20351 | 13.8404 | 1.86702 | 13.84041 | 2.55859 |
| 44.847 | 0.24517 | 13.8601  | 0.00371   | 13.8601  | 0.60311 | 13.8601  | 1.20571 | 13.8601 | 1.85484 | 13.8601  | 2.53769 |
| 44.947 | 0.24572 | 13.87978 | -7.44E-04 | 13.87978 | 0.60138 | 13.87978 | 1.20595 | 13.8798 | 1.84429 | 13.87978 | 2.52049 |
| 45.047 | 0.24558 | 13.89947 | -0.00397  | 13.89947 | 0.59946 | 13.89947 | 1.20387 | 13.8995 | 1.84005 | 13.89947 | 2.49559 |
| 45.147 | 0.24566 | 13.91916 | 7.85E-04  | 13.91916 | 0.59823 | 13.91916 | 1.20086 | 13.9192 | 1.83655 | 13.91916 | 2.47008 |
| 45.247 | 0.24585 | 13.93885 | 0.00255   | 13.93885 | 0.61109 | 13.93885 | 1.20213 | 13.9389 | 1.82937 | 13.93885 | 2.45045 |
| 45.347 | 0.24627 | 13.95854 | 8.87E-04  | 13.95854 | 0.60103 | 13.95854 | 1.19928 | 13.9585 | 1.82476 | 13.95854 | 2.4367  |
| 45.447 | 0.24648 | 13.97823 | -0.00383  | 13.97823 | 0.6065  | 13.97823 | 1.20081 | 13.9782 | 1.81601 | 13.97823 | 2.42889 |
| 45.547 | 0.24606 | 13.99792 | 0.00125   | 13.99792 | 0.60102 | 13.99792 | 1.20311 | 13.9979 | 1.81402 | 13.99792 | 2.40811 |
| 45.647 | 0.24609 | 14.01761 | -5.48E-04 | 14.01761 | 0.59973 | 14.01761 | 1.20263 | 14.0176 | 1.80441 | 14.01761 | 2.40781 |
| 45.747 | 0.24624 | 14.0373  | -2.05E-04 | 14.0373  | 0.59843 | 14.0373  | 1.20282 | 14.0373 | 1.80379 | 14.0373  | 2.40473 |
| 45.847 | 0.24615 | 14.05699 | 0.00189   | 14.05699 | 0.60165 | 14.05699 | 1.20224 | 14.057  | 1.80148 | 14.05699 | 2.40462 |
| 45.947 | 0.24634 | 14.07668 | 2.87E-04  | 14.07668 | 0.60305 | 14.07668 | 1.20238 | 14.0767 | 1.80699 | 14.07668 | 2.40632 |
| 46.047 | 0.24646 | 14.09636 | 4.36E-04  | 14.09636 | 0.6047  | 14.09636 | 1.20184 | 14.0964 | 1.80262 | 14.09636 | 2.4036  |
| 46.147 | 0.24677 | 14.11605 | 0.00104   | 14.11605 | 0.59821 | 14.11605 | 1.20327 | 14.1161 | 1.80319 | 14.11605 | 2.40203 |
| 46.247 | 0.2471  | 14.13574 | 4.10E-04  | 14.13574 | 0.6013  | 14.13574 | 1.20413 | 14.1357 | 1.80451 | 14.13574 | 2.40156 |
| 46.347 | 0.24711 | 14.15543 | -8.03E-04 | 14.15543 | 0.60001 | 14.15543 | 1.2022  | 14.1554 | 1.80176 | 14.15543 | 2.40175 |
| 46.447 | 0.24724 | 14.17512 | -0.00253  | 14.17512 | 0.60066 | 14.17512 | 1.20053 | 14.1751 | 1.79533 | 14.17512 | 2.40333 |
| 46.547 | 0.24715 | 14.19481 | -0.00342  | 14.19481 | 0.59618 | 14.19481 | 1.20501 | 14.1948 | 1.7994  | 14.19481 | 2.40606 |
| 46.647 | 0.24697 | 14.2145  | 0.00191   | 14.2145  | 0.60114 | 14.2145  | 1.20101 | 14.2145 | 1.79897 | 14.2145  | 2.40995 |
| 46.747 | 0.24736 | 14.23419 | -0.00176  | 14.23419 | 0.60117 | 14.23419 | 1.20322 | 14.2342 | 1.80029 | 14.23419 | 2.39935 |
| 46.847 | 0.24752 | 14.25388 | 7.85E-04  | 14.25388 | 0.6     | 14.25388 | 1.2     | 14.2539 | 1.80299 | 14.25388 | 2.40039 |
| 46.947 | 0.24753 | 14.27357 | -8.17E-04 | 14.27357 | 0.60255 | 14.27357 | 1.20175 | 14.2736 | 1.79937 | 14.27357 | 2.40482 |
| 47.047 | 0.2474  | 14.29325 | -0.00235  | 14.29325 | 0.6029  | 14.29325 | 1.20444 | 14.2933 | 1.79838 | 14.29325 | 2.40234 |
| 47.147 | 0.24757 | 14.31294 | 0.00298   | 14.31294 | 0.60714 | 14.31294 | 1.20077 | 14.3129 | 1.79994 | 14.31294 | 2.39799 |
| 47.247 | 0.2477  | 14.33263 | -0.00277  | 14.33263 | 0.60605 | 14.33263 | 1.19969 | 14.3326 | 1.79764 | 14.33263 | 2.40291 |
| 47.347 | 0.24765 | 14.35232 | -6.72E-04 | 14.35232 | 0.60197 | 14.35232 | 1.20304 | 14.3523 | 1.8044  | 14.35232 | 2.40055 |
| 47.447 | 0.24787 | 14.37201 | 0.00531   | 14.37201 | 0.59976 | 14.37201 | 1.20407 | 14.372  | 1.80059 | 14.37201 | 2.39668 |
| 47.547 | 0.24783 | 14.3917  | -0.00212  | 14.3917  | 0.60581 | 14.3917  | 1.20283 | 14.3917 | 1.80522 | 14.3917  | 2.39705 |
| 47.647 | 0.24801 | 14.41139 | 0.00321   | 14.41139 | 0.61048 | 14.41139 | 1.20304 | 14.4114 | 1.80323 | 14.41139 | 2.40082 |
| 47.747 | 0.24818 | 14.43108 | 0.00336   | 14.43108 | 0.60208 | 14.43108 | 1.19772 | 14.4311 | 1.80249 | 14.43108 | 2.39743 |

|        |         |          |         |          |         |          |         |         |         |          |         |
|--------|---------|----------|---------|----------|---------|----------|---------|---------|---------|----------|---------|
| 47.847 | 0.24871 | 14.45077 | 0.00461 | 14.45077 | 0.607   | 14.45077 | 1.20046 | 14.4508 | 1.80068 | 14.45077 | 2.40047 |
| 47.947 | 0.24854 | 14.47046 | 0.00853 | 14.47046 | 0.60385 | 14.47046 | 1.20102 | 14.4705 | 1.80238 | 14.47046 | 2.40023 |
| 48.047 | 0.24835 | 14.49015 | 0.00206 | 14.49015 | 0.60934 | 14.49015 | 1.20578 | 14.4902 | 1.80363 | 14.49015 | 2.4     |
| 48.147 | 0.2485  | 14.50984 | 0.00526 | 14.50984 | 0.60969 | 14.50984 | 1.19927 | 14.5098 | 1.80008 | 14.50984 | 2.39867 |
| 48.247 | 0.24863 | 14.52952 | 0.013   | 14.52952 | 0.6113  | 14.52952 | 1.20268 | 14.5295 | 1.80227 | 14.52952 | 2.39765 |
| 48.347 | 0.2487  | 14.54921 | 0.01101 | 14.54921 | 0.60509 | 14.54921 | 1.20619 | 14.5492 | 1.80578 | 14.54921 | 2.40311 |
| 48.447 | 0.24871 | 14.5689  | 0.01375 | 14.5689  | 0.61326 | 14.5689  | 1.20557 | 14.5689 | 1.80803 | 14.5689  | 2.39773 |
| 48.547 | 0.24866 | 14.58859 | 0.0117  | 14.58859 | 0.60724 | 14.58859 | 1.21099 | 14.5886 | 1.80542 | 14.58859 | 2.40179 |
| 48.647 | 0.24838 | 14.60828 | 0.01989 | 14.60828 | 0.61923 | 14.60828 | 1.20846 | 14.6083 | 1.80436 | 14.60828 | 2.40065 |
| 48.747 | 0.24907 | 14.62797 | 0.01465 | 14.62797 | 0.61277 | 14.62797 | 1.20918 | 14.628  | 1.79637 | 14.62797 | 2.39436 |
| 48.847 | 0.24901 | 14.64766 | 0.01623 | 14.64766 | 0.61212 | 14.64766 | 1.21383 | 14.6477 | 1.8     | 14.64766 | 2.4     |
| 48.947 | 0.24915 | 14.66735 | 0.01755 | 14.66735 | 0.61129 | 14.66735 | 1.20464 | 14.6674 | 1.80314 | 14.66735 | 2.40064 |
| 49.047 | 0.24919 | 14.68704 | 0.02386 | 14.68704 | 0.61972 | 14.68704 | 1.2081  | 14.687  | 1.79929 | 14.68704 | 2.39685 |
| 49.147 | 0.24941 | 14.70673 | 0.02511 | 14.70673 | 0.6242  | 14.70673 | 1.20469 | 14.7067 | 1.80374 | 14.70673 | 2.40046 |
| 49.247 | 0.24908 | 14.72642 | 0.0215  | 14.72642 | 0.61905 | 14.72642 | 1.20552 | 14.7264 | 1.80313 | 14.72642 | 2.40225 |
| 49.347 | 0.24923 | 14.7461  | 0.01906 | 14.7461  | 0.62416 | 14.7461  | 1.20588 | 14.7461 | 1.79896 | 14.7461  | 2.40095 |
| 49.447 | 0.24955 | 14.76579 | 0.02038 | 14.76579 | 0.62233 | 14.76579 | 1.20051 | 14.7658 | 1.79535 | 14.76579 | 2.4008  |
| 49.547 | 0.24946 | 14.78548 | 0.03246 | 14.78548 | 0.62725 | 14.78548 | 1.20712 | 14.7855 | 1.80281 | 14.78548 | 2.39762 |
| 49.647 | 0.24953 | 14.80517 | 0.03066 | 14.80517 | 0.62949 | 14.80517 | 1.20557 | 14.8052 | 1.8017  | 14.80517 | 2.39989 |
| 49.747 | 0.24947 | 14.82486 | 0.03263 | 14.82486 | 0.62934 | 14.82486 | 1.20707 | 14.8249 | 1.80428 | 14.82486 | 2.3995  |
| 49.847 | 0.24957 | 14.84455 | 0.03524 | 14.84455 | 0.63082 | 14.84455 | 1.20779 | 14.8446 | 1.80473 | 14.84455 | 2.40559 |
| 49.947 | 0.24907 | 14.86424 | 0.03131 | 14.86424 | 0.63293 | 14.86424 | 1.20996 | 14.8642 | 1.80706 | 14.86424 | 2.40386 |
| 50.047 | 0.24927 | 14.88393 | 0.0349  | 14.88393 | 0.63786 | 14.88393 | 1.20909 | 14.8839 | 1.80683 | 14.88393 | 2.40771 |
| 50.147 | 0.24941 | 14.90362 | 0.03226 | 14.90362 | 0.63177 | 14.90362 | 1.21131 | 14.9036 | 1.80922 | 14.90362 | 2.40835 |
| 50.247 | 0.24963 | 14.92331 | 0.03448 | 14.92331 | 0.634   | 14.92331 | 1.21002 | 14.9233 | 1.81536 | 14.92331 | 2.41414 |
| 50.347 | 0.24969 | 14.943   | 0.0395  | 14.943   | 0.64093 | 14.943   | 1.2095  | 14.943  | 1.81601 | 14.943   | 2.41739 |
| 50.447 | 0.24985 | 14.96268 | 0.02992 | 14.96268 | 0.64491 | 14.96268 | 1.21957 | 14.9627 | 1.8154  | 14.96268 | 2.41651 |
| 50.547 | 0.25013 | 14.98237 | 0.03798 | 14.98237 | 0.63563 | 14.98237 | 1.21643 | 14.9824 | 1.82179 | 14.98237 | 2.42157 |
| 50.647 | 0.25027 | 15.00206 | 0.03865 | 15.00206 | 0.63035 | 15.00206 | 1.22722 | 15.0021 | 1.82475 | 15.00206 | 2.42379 |
| 50.747 | 0.25018 | 15.02175 | 0.02798 | 15.02175 | 0.62608 | 15.02175 | 1.22464 | 15.0218 | 1.83401 | 15.02175 | 2.42412 |
| 50.847 | 0.24981 | 15.04144 | 0.03721 | 15.04144 | 0.63188 | 15.04144 | 1.22665 | 15.0414 | 1.83797 | 15.04144 | 2.43179 |
| 50.947 | 0.25002 | 15.06113 | 0.02867 | 15.06113 | 0.62322 | 15.06113 | 1.22857 | 15.0611 | 1.8433  | 15.06113 | 2.43412 |
| 51.047 | 0.25005 | 15.08082 | 0.02797 | 15.08082 | 0.62126 | 15.08082 | 1.23507 | 15.0808 | 1.85094 | 15.08082 | 2.43907 |
| 51.147 | 0.25017 | 15.10051 | 0.02521 | 15.10051 | 0.61761 | 15.10051 | 1.23131 | 15.1005 | 1.8474  | 15.10051 | 2.43746 |
| 51.247 | 0.2503  | 15.1202  | 0.01427 | 15.1202  | 0.61503 | 15.1202  | 1.23761 | 15.1202 | 1.84485 | 15.1202  | 2.44513 |
| 51.347 | 0.25012 | 15.13989 | 0.01429 | 15.13989 | 0.60881 | 15.13989 | 1.23637 | 15.1399 | 1.83868 | 15.13989 | 2.44559 |
| 51.447 | 0.25017 | 15.15958 | 0.01334 | 15.15958 | 0.61436 | 15.15958 | 1.24175 | 15.1596 | 1.83852 | 15.15958 | 2.44138 |
| 51.547 | 0.25029 | 15.17927 | 0.00876 | 15.17927 | 0.60659 | 15.17927 | 1.24165 | 15.1793 | 1.83916 | 15.17927 | 2.43978 |
| 51.647 | 0.25038 | 15.19895 | 0.00949 | 15.19895 | 0.60619 | 15.19895 | 1.24118 | 15.199  | 1.8363  | 15.19895 | 2.44502 |
| 51.747 | 0.25066 | 15.21864 | 0.00932 | 15.21864 | 0.60348 | 15.21864 | 1.23876 | 15.2186 | 1.82295 | 15.21864 | 2.43706 |
| 51.847 | 0.25025 | 15.23833 | 0.00752 | 15.23833 | 0.60164 | 15.23833 | 1.24429 | 15.2383 | 1.82722 | 15.23833 | 2.438   |
| 51.947 | 0.25053 | 15.25802 | 0.0056  | 15.25802 | 0.60651 | 15.25802 | 1.23959 | 15.258  | 1.81874 | 15.25802 | 2.44209 |
| 52.047 | 0.25067 | 15.27771 | 0.00614 | 15.27771 | 0.59985 | 15.27771 | 1.2366  | 15.2777 | 1.81532 | 15.27771 | 2.44364 |
| 52.147 | 0.25136 | 15.2974  | 0.00324 | 15.2974  | 0.60177 | 15.2974  | 1.2428  | 15.2974 | 1.81559 | 15.2974  | 2.45422 |

|        |         |          |           |          |         |          |         |         |         |          |         |
|--------|---------|----------|-----------|----------|---------|----------|---------|---------|---------|----------|---------|
| 52.247 | 0.25129 | 15.31709 | 3.47E-04  | 15.31709 | 0.60075 | 15.31709 | 1.23418 | 15.3171 | 1.82848 | 15.31709 | 2.46722 |
| 52.347 | 0.25105 | 15.33678 | 0.00439   | 15.33678 | 0.59942 | 15.33678 | 1.22918 | 15.3368 | 1.821   | 15.33678 | 2.47641 |
| 52.447 | 0.25116 | 15.35647 | 0.0024    | 15.35647 | 0.60835 | 15.35647 | 1.22649 | 15.3565 | 1.82789 | 15.35647 | 2.48808 |
| 52.547 | 0.25114 | 15.37616 | 0.00573   | 15.37616 | 0.59387 | 15.37616 | 1.21519 | 15.3762 | 1.8366  | 15.37616 | 2.5072  |
| 52.647 | 0.25116 | 15.39584 | 0.00867   | 15.39584 | 0.60249 | 15.39584 | 1.21819 | 15.3958 | 1.84362 | 15.39584 | 2.5199  |
| 52.747 | 0.25127 | 15.41553 | 0.00564   | 15.41553 | 0.60153 | 15.41553 | 1.21608 | 15.4155 | 1.8497  | 15.41553 | 2.53666 |
| 52.847 | 0.25151 | 15.43522 | 0.0045    | 15.43522 | 0.60833 | 15.43522 | 1.21463 | 15.4352 | 1.86434 | 15.43522 | 2.54991 |
| 52.947 | 0.25158 | 15.45491 | 0.00484   | 15.45491 | 0.60299 | 15.45491 | 1.21531 | 15.4549 | 1.87586 | 15.45491 | 2.56473 |
| 53.047 | 0.25158 | 15.4746  | 0.00525   | 15.4746  | 0.60316 | 15.4746  | 1.21051 | 15.4746 | 1.89094 | 15.4746  | 2.57313 |
| 53.147 | 0.25161 | 15.49429 | 0.00534   | 15.49429 | 0.59989 | 15.49429 | 1.21279 | 15.4943 | 1.90246 | 15.49429 | 2.58153 |
| 53.247 | 0.25148 | 15.51398 | 0.00783   | 15.51398 | 0.60031 | 15.51398 | 1.21254 | 15.514  | 1.91354 | 15.51398 | 2.59835 |
| 53.347 | 0.25152 | 15.53367 | 0.01362   | 15.53367 | 0.59766 | 15.53367 | 1.21006 | 15.5337 | 1.91287 | 15.53367 | 2.60663 |
| 53.447 | 0.25161 | 15.55336 | 0.00242   | 15.55336 | 0.60271 | 15.55336 | 1.21327 | 15.5534 | 1.93207 | 15.55336 | 2.62079 |
| 53.547 | 0.25159 | 15.57305 | 0.00186   | 15.57305 | 0.60137 | 15.57305 | 1.20945 | 15.5731 | 1.92747 | 15.57305 | 2.62573 |
| 53.647 | 0.25153 | 15.59274 | 0.00979   | 15.59274 | 0.60242 | 15.59274 | 1.20512 | 15.5927 | 1.93924 | 15.59274 | 2.63546 |
| 53.747 | 0.25171 | 15.61242 | 0.00463   | 15.61242 | 0.60966 | 15.61242 | 1.2105  | 15.6124 | 1.94057 | 15.61242 | 2.62889 |
| 53.847 | 0.2518  | 15.63211 | 0.00692   | 15.63211 | 0.6     | 15.63211 | 1.21195 | 15.6321 | 1.94515 | 15.63211 | 2.61874 |
| 53.947 | 0.25206 | 15.6518  | 0.00655   | 15.6518  | 0.60407 | 15.6518  | 1.20699 | 15.6518 | 1.93268 | 15.6518  | 2.61078 |
| 54.047 | 0.25222 | 15.67149 | 0.00579   | 15.67149 | 0.60839 | 15.67149 | 1.21547 | 15.6715 | 1.92614 | 15.67149 | 2.59487 |
| 54.147 | 0.25219 | 15.69118 | 7.57E-04  | 15.69118 | 0.60933 | 15.69118 | 1.21129 | 15.6912 | 1.91553 | 15.69118 | 2.56127 |
| 54.247 | 0.2521  | 15.71087 | 0.00272   | 15.71087 | 0.60326 | 15.71087 | 1.21672 | 15.7109 | 1.90537 | 15.71087 | 2.54046 |
| 54.347 | 0.25208 | 15.73056 | 0.00612   | 15.73056 | 0.59982 | 15.73056 | 1.21699 | 15.7306 | 1.90377 | 15.73056 | 2.50535 |
| 54.447 | 0.25193 | 15.75025 | 0.00141   | 15.75025 | 0.60269 | 15.75025 | 1.2174  | 15.7503 | 1.89541 | 15.75025 | 2.48005 |
| 54.547 | 0.252   | 15.76994 | 9.73E-04  | 15.76994 | 0.6082  | 15.76994 | 1.22004 | 15.7699 | 1.88444 | 15.76994 | 2.46069 |
| 54.647 | 0.25182 | 15.78963 | 0.00223   | 15.78963 | 0.59713 | 15.78963 | 1.22346 | 15.7896 | 1.87609 | 15.78963 | 2.44309 |
| 54.747 | 0.25198 | 15.80932 | 0.00166   | 15.80932 | 0.60777 | 15.80932 | 1.22326 | 15.8093 | 1.86336 | 15.80932 | 2.43367 |
| 54.847 | 0.25218 | 15.82901 | 0         | 15.82901 | 0.60476 | 15.82901 | 1.22657 | 15.829  | 1.84888 | 15.82901 | 2.42419 |
| 54.947 | 0.25232 | 15.84869 | 0.00274   | 15.84869 | 0.6047  | 15.84869 | 1.22797 | 15.8487 | 1.84597 | 15.84869 | 2.41865 |
| 55.047 | 0.25206 | 15.86838 | 0.00237   | 15.86838 | 0.60108 | 15.86838 | 1.23319 | 15.8684 | 1.84474 | 15.86838 | 2.41366 |
| 55.147 | 0.25206 | 15.88807 | 4.47E-04  | 15.88807 | 0.60784 | 15.88807 | 1.23805 | 15.8881 | 1.84295 | 15.88807 | 2.4126  |
| 55.247 | 0.25206 | 15.90776 | -0.00122  | 15.90776 | 0.60215 | 15.90776 | 1.24229 | 15.9078 | 1.83573 | 15.90776 | 2.41446 |
| 55.347 | 0.25213 | 15.92745 | -0.00496  | 15.92745 | 0.59996 | 15.92745 | 1.24401 | 15.9275 | 1.84918 | 15.92745 | 2.41243 |
| 55.447 | 0.25217 | 15.94714 | -0.00144  | 15.94714 | 0.59877 | 15.94714 | 1.24443 | 15.9471 | 1.83258 | 15.94714 | 2.40623 |
| 55.547 | 0.25219 | 15.96683 | -0.00194  | 15.96683 | 0.60553 | 15.96683 | 1.25177 | 15.9668 | 1.83054 | 15.96683 | 2.40542 |
| 55.647 | 0.25208 | 15.98652 | -0.00315  | 15.98652 | 0.60453 | 15.98652 | 1.25719 | 15.9865 | 1.83319 | 15.98652 | 2.41297 |
| 55.747 | 0.25211 | 16.00621 | 0.00588   | 16.00621 | 0.60135 | 16.00621 | 1.25601 | 16.0062 | 1.82334 | 16.00621 | 2.41258 |
| 55.847 | 0.25205 | 16.0259  | 0.00201   | 16.0259  | 0.61105 | 16.0259  | 1.25334 | 16.0259 | 1.82017 | 16.0259  | 2.41862 |
| 55.947 | 0.25212 | 16.04559 | -4.35E-04 | 16.04559 | 0.61005 | 16.04559 | 1.24942 | 16.0456 | 1.81776 | 16.04559 | 2.41248 |
| 56.047 | 0.25216 | 16.06527 | 0.00717   | 16.06527 | 0.60443 | 16.06527 | 1.25118 | 16.0653 | 1.81803 | 16.06527 | 2.41778 |
| 56.147 | 0.25231 | 16.08496 | 0.00233   | 16.08496 | 0.60462 | 16.08496 | 1.24128 | 16.085  | 1.82399 | 16.08496 | 2.42304 |
| 56.247 | 0.25192 | 16.10465 | 0.00468   | 16.10465 | 0.60269 | 16.10465 | 1.23917 | 16.1047 | 1.82727 | 16.10465 | 2.42853 |
| 56.347 | 0.25165 | 16.12434 | 0.006     | 16.12434 | 0.61214 | 16.12434 | 1.23649 | 16.1243 | 1.82548 | 16.12434 | 2.43196 |
| 56.447 | 0.25179 | 16.14403 | 0.00459   | 16.14403 | 0.60689 | 16.14403 | 1.23066 | 16.144  | 1.834   | 16.14403 | 2.43333 |
| 56.547 | 0.252   | 16.16372 | 0.00396   | 16.16372 | 0.60946 | 16.16372 | 1.22706 | 16.1637 | 1.84508 | 16.16372 | 2.44137 |

|        |         |          |          |          |         |          |         |         |         |          |         |
|--------|---------|----------|----------|----------|---------|----------|---------|---------|---------|----------|---------|
| 56.647 | 0.25187 | 16.18341 | 0.00236  | 16.18341 | 0.60872 | 16.18341 | 1.22598 | 16.1834 | 1.84736 | 16.18341 | 2.44935 |
| 56.747 | 0.25181 | 16.2031  | 9.53E-04 | 16.2031  | 0.60603 | 16.2031  | 1.22893 | 16.2031 | 1.85307 | 16.2031  | 2.44538 |
| 56.847 | 0.25214 | 16.22279 | 0        | 16.22279 | 0.60923 | 16.22279 | 1.22832 | 16.2228 | 1.86459 | 16.22279 | 2.45875 |
| 56.947 | 0.25184 | 16.24248 | 0.00586  | 16.24248 | 0.60799 | 16.24248 | 1.2321  | 16.2425 | 1.85805 | 16.24248 | 2.46631 |
| 57.047 | 0.25199 | 16.26217 | 0.0077   | 16.26217 | 0.61332 | 16.26217 | 1.23221 | 16.2622 | 1.86376 | 16.26217 | 2.46986 |
| 57.147 | 0.2521  | 16.28185 | 0.00462  | 16.28185 | 0.61433 | 16.28185 | 1.23336 | 16.2819 | 1.86941 | 16.28185 | 2.47651 |
| 57.247 | 0.25201 | 16.30154 | 0.01067  | 16.30154 | 0.62836 | 16.30154 | 1.24225 | 16.3015 | 1.87556 | 16.30154 | 2.48055 |
| 57.347 | 0.25218 | 16.32123 | 0.00947  | 16.32123 | 0.62355 | 16.32123 | 1.24443 | 16.3212 | 1.87052 | 16.32123 | 2.48883 |
| 57.447 | 0.25224 | 16.34092 | 0.00748  | 16.34092 | 0.63895 | 16.34092 | 1.2543  | 16.3409 | 1.87061 | 16.34092 | 2.49438 |
| 57.547 | 0.25213 | 16.36061 | 0.00679  | 16.36061 | 0.64747 | 16.36061 | 1.26593 | 16.3606 | 1.87332 | 16.36061 | 2.49387 |
| 57.647 | 0.25215 | 16.3803  | 0.01596  | 16.3803  | 0.65574 | 16.3803  | 1.2852  | 16.3803 | 1.85747 | 16.3803  | 2.49082 |
| 57.747 | 0.25192 | 16.39999 | 0.00613  | 16.39999 | 0.66251 | 16.39999 | 1.2929  | 16.4    | 1.85574 | 16.39999 | 2.48595 |
| 57.847 | 0.25207 | 16.41968 | 0.01478  | 16.41968 | 0.67297 | 16.41968 | 1.31609 | 16.4197 | 1.85671 | 16.41968 | 2.48084 |
| 57.947 | 0.25222 | 16.43937 | 0.01792  | 16.43937 | 0.69445 | 16.43937 | 1.33041 | 16.4394 | 1.84636 | 16.43937 | 2.46718 |
| 58.047 | 0.25223 | 16.45906 | 0.02139  | 16.45906 | 0.70341 | 16.45906 | 1.35407 | 16.4591 | 1.85138 | 16.45906 | 2.45922 |
| 58.147 | 0.25237 | 16.47874 | 0.02505  | 16.47874 | 0.71688 | 16.47874 | 1.38206 | 16.4787 | 1.86215 | 16.47874 | 2.45011 |
| 58.247 | 0.25224 | 16.49843 | 0.03785  | 16.49843 | 0.72941 | 16.49843 | 1.39395 | 16.4984 | 1.8828  | 16.49843 | 2.44627 |
| 58.347 | 0.25191 | 16.51812 | 0.04281  | 16.51812 | 0.74826 | 16.51812 | 1.41632 | 16.5181 | 1.9092  | 16.51812 | 2.44746 |
| 58.447 | 0.2519  | 16.53781 | 0.05055  | 16.53781 | 0.76349 | 16.53781 | 1.43559 | 16.5378 | 1.9554  | 16.53781 | 2.4475  |
| 58.547 | 0.25187 | 16.5575  | 0.05843  | 16.5575  | 0.79135 | 16.5575  | 1.45305 | 16.5575 | 2.00566 | 16.5575  | 2.44705 |
| 58.647 | 0.25177 | 16.57719 | 0.06273  | 16.57719 | 0.803   | 16.57719 | 1.48585 | 16.5772 | 2.04631 | 16.57719 | 2.44885 |
| 58.747 | 0.25172 | 16.59688 | 0.07865  | 16.59688 | 0.82254 | 16.59688 | 1.51302 | 16.5969 | 2.0897  | 16.59688 | 2.44841 |
| 58.847 | 0.25187 | 16.61657 | 0.08828  | 16.61657 | 0.83432 | 16.61657 | 1.55248 | 16.6166 | 2.08985 | 16.61657 | 2.45123 |
| 58.947 | 0.25184 | 16.63626 | 0.10465  | 16.63626 | 0.84054 | 16.63626 | 1.59267 | 16.6363 | 2.06644 | 16.63626 | 2.45364 |
| 59.047 | 0.25196 | 16.65595 | 0.11519  | 16.65595 | 0.8288  | 16.65595 | 1.61344 | 16.656  | 2.03447 | 16.65595 | 2.45246 |
| 59.147 | 0.25229 | 16.67564 | 0.12268  | 16.67564 | 0.80522 | 16.67564 | 1.64226 | 16.6756 | 1.9617  | 16.67564 | 2.45196 |
| 59.247 | 0.25237 | 16.69533 | 0.14768  | 16.69533 | 0.78672 | 16.69533 | 1.65038 | 16.6953 | 1.90792 | 16.69533 | 2.45521 |
| 59.347 | 0.25258 | 16.71502 | 0.15795  | 16.71502 | 0.75502 | 16.71502 | 1.63531 | 16.715  | 1.87589 | 16.71502 | 2.44258 |
| 59.447 | 0.25232 | 16.7347  | 0.16985  | 16.7347  | 0.72037 | 16.7347  | 1.58327 | 16.7347 | 1.85067 | 16.7347  | 2.44444 |
| 59.547 | 0.25246 | 16.75439 | 0.16755  | 16.75439 | 0.68948 | 16.75439 | 1.519   | 16.7544 | 1.84357 | 16.75439 | 2.43563 |
| 59.647 | 0.25239 | 16.77408 | 0.14476  | 16.77408 | 0.66778 | 16.77408 | 1.43556 | 16.7741 | 1.82879 | 16.77408 | 2.42786 |
| 59.747 | 0.2525  | 16.79377 | 0.1326   | 16.79377 | 0.65604 | 16.79377 | 1.36855 | 16.7938 | 1.82363 | 16.79377 | 2.43184 |
| 59.847 | 0.25217 | 16.81346 | 0.1113   | 16.81346 | 0.63378 | 16.81346 | 1.31269 | 16.8135 | 1.82084 | 16.81346 | 2.42733 |
| 59.947 | 0.25213 | 16.83315 | 0.08306  | 16.83315 | 0.62906 | 16.83315 | 1.27149 | 16.8332 | 1.81949 | 16.83315 | 2.42107 |
| 60.047 | 0.25201 | 16.85284 | 0.06313  | 16.85284 | 0.62289 | 16.85284 | 1.2525  | 16.8528 | 1.81814 | 16.85284 | 2.42553 |
| 60.147 | 0.25202 | 16.87253 | 0.04806  | 16.87253 | 0.61935 | 16.87253 | 1.23635 | 16.8725 | 1.82417 | 16.87253 | 2.42272 |
| 60.247 | 0.25201 | 16.89222 | 0.03422  | 16.89222 | 0.61105 | 16.89222 | 1.22743 | 16.8922 | 1.82932 | 16.89222 | 2.42882 |
| 60.347 | 0.25168 | 16.91191 | 0.02492  | 16.91191 | 0.6119  | 16.91191 | 1.21743 | 16.9119 | 1.83222 | 16.91191 | 2.4345  |
| 60.447 | 0.25189 | 16.93159 | 0.02035  | 16.93159 | 0.60955 | 16.93159 | 1.21496 | 16.9316 | 1.83381 | 16.93159 | 2.43678 |
| 60.547 | 0.25176 | 16.95128 | 0.01144  | 16.95128 | 0.60476 | 16.95128 | 1.21219 | 16.9513 | 1.84852 | 16.95128 | 2.44585 |
| 60.647 | 0.25198 | 16.97097 | 0.01271  | 16.97097 | 0.60485 | 16.97097 | 1.21478 | 16.971  | 1.84129 | 16.97097 | 2.45129 |
| 60.747 | 0.25211 | 16.99066 | 0.01398  | 16.99066 | 0.60769 | 16.99066 | 1.20911 | 16.9907 | 1.84563 | 16.99066 | 2.45824 |
| 60.847 | 0.25222 | 17.01035 | 0.00442  | 17.01035 | 0.60415 | 17.01035 | 1.20866 | 17.0104 | 1.84466 | 17.01035 | 2.47398 |
| 60.947 | 0.2519  | 17.03004 | 0.01232  | 17.03004 | 0.60438 | 17.03004 | 1.20573 | 17.03   | 1.84287 | 17.03004 | 2.46862 |



|        |         |          |         |          |         |          |         |         |         |          |         |
|--------|---------|----------|---------|----------|---------|----------|---------|---------|---------|----------|---------|
| 61.047 | 0.2517  | 17.04973 | 0.00866 | 17.04973 | 0.60316 | 17.04973 | 1.20683 | 17.0497 | 1.85021 | 17.04973 | 2.48315 |
| 61.147 | 0.25147 | 17.06942 | 0.00689 | 17.06942 | 0.6047  | 17.06942 | 1.2087  | 17.0694 | 1.84455 | 17.06942 | 2.48567 |
| 61.247 | 0.25149 | 17.08911 | 0.00953 | 17.08911 | 0.60167 | 17.08911 | 1.20128 | 17.0891 | 1.83945 | 17.08911 | 2.48596 |
| 61.347 | 0.25154 | 17.1088  | 0.01561 | 17.1088  | 0.60389 | 17.1088  | 1.20615 | 17.1088 | 1.83417 | 17.1088  | 2.49478 |
| 61.447 | 0.25146 | 17.12848 | 0.01591 | 17.12848 | 0.60205 | 17.12848 | 1.20105 | 17.1285 | 1.82675 | 17.12848 | 2.4887  |
| 61.547 | 0.25115 | 17.14817 | 0.0168  | 17.14817 | 0.60878 | 17.14817 | 1.19936 | 17.1482 | 1.82572 | 17.14817 | 2.46517 |
| 61.647 | 0.2512  | 17.16786 | 0.01775 | 17.16786 | 0.60494 | 17.16786 | 1.20547 | 17.1679 | 1.82424 | 17.16786 | 2.4677  |
| 61.747 | 0.25074 | 17.18755 | 0.02137 | 17.18755 | 0.60742 | 17.18755 | 1.20161 | 17.1876 | 1.81784 | 17.18755 | 2.44519 |
| 61.847 | 0.25065 | 17.20724 | 0.02284 | 17.20724 | 0.60783 | 17.20724 | 1.20007 | 17.2072 | 1.80824 | 17.20724 | 2.42687 |
| 61.947 | 0.25074 | 17.22693 | 0.0308  | 17.22693 | 0.60844 | 17.22693 | 1.20561 | 17.2269 | 1.80314 | 17.22693 | 2.42079 |
| 62.047 | 0.25079 | 17.24662 | 0.03993 | 17.24662 | 0.61436 | 17.24662 | 1.20656 | 17.2466 | 1.80148 | 17.24662 | 2.40877 |
| 62.147 | 0.25077 | 17.26631 | 0.05289 | 17.26631 | 0.6161  | 17.26631 | 1.20518 | 17.2663 | 1.80025 | 17.26631 | 2.4076  |
| 62.247 | 0.25056 | 17.286   | 0.05515 | 17.286   | 0.62616 | 17.286   | 1.20711 | 17.286  | 1.80034 | 17.286   | 2.40818 |
| 62.347 | 0.25013 | 17.30569 | 0.06623 | 17.30569 | 0.61613 | 17.30569 | 1.20748 | 17.3057 | 1.79425 | 17.30569 | 2.40586 |
| 62.447 | 0.24998 | 17.32538 | 0.07036 | 17.32538 | 0.63494 | 17.32538 | 1.20771 | 17.3254 | 1.79683 | 17.32538 | 2.40808 |
| 62.547 | 0.24999 | 17.34507 | 0.07509 | 17.34507 | 0.6343  | 17.34507 | 1.20189 | 17.3451 | 1.80267 | 17.34507 | 2.40291 |
| 62.647 | 0.25035 | 17.36476 | 0.08804 | 17.36476 | 0.64849 | 17.36476 | 1.20345 | 17.3648 | 1.7982  | 17.36476 | 2.40392 |
| 62.747 | 0.25004 | 17.38444 | 0.09724 | 17.38444 | 0.64246 | 17.38444 | 1.21189 | 17.3844 | 1.79785 | 17.38444 | 2.40463 |
| 62.847 | 0.24978 | 17.40413 | 0.10994 | 17.40413 | 0.65834 | 17.40413 | 1.2101  | 17.4041 | 1.8     | 17.40413 | 2.4     |
| 62.947 | 0.24922 | 17.42382 | 0.11739 | 17.42382 | 0.65664 | 17.42382 | 1.20676 | 17.4238 | 1.79503 | 17.42382 | 2.40124 |
| 63.047 | 0.24937 | 17.44351 | 0.12031 | 17.44351 | 0.66214 | 17.44351 | 1.21235 | 17.4435 | 1.80024 | 17.44351 | 2.39769 |
| 63.147 | 0.2489  | 17.4632  | 0.13918 | 17.4632  | 0.6789  | 17.4632  | 1.20396 | 17.4632 | 1.79439 | 17.4632  | 2.40117 |
| 63.247 | 0.24878 | 17.48289 | 0.13729 | 17.48289 | 0.67877 | 17.48289 | 1.2109  | 17.4829 | 1.79448 | 17.48289 | 2.40108 |
| 63.347 | 0.24853 | 17.50258 | 0.13463 | 17.50258 | 0.68495 | 17.50258 | 1.20998 | 17.5026 | 1.79044 | 17.50258 | 2.40274 |
| 63.447 | 0.2486  | 17.52227 | 0.13567 | 17.52227 | 0.68958 | 17.52227 | 1.21067 | 17.5223 | 1.79209 | 17.52227 | 2.39331 |
| 63.547 | 0.24825 | 17.54196 | 0.1437  | 17.54196 | 0.68688 | 17.54196 | 1.20791 | 17.542  | 1.79486 | 17.54196 | 2.39625 |
| 63.647 | 0.248   | 17.56165 | 0.1293  | 17.56165 | 0.69206 | 17.56165 | 1.21154 | 17.5617 | 1.7932  | 17.56165 | 2.39512 |
| 63.747 | 0.24758 | 17.58134 | 0.12061 | 17.58134 | 0.67854 | 17.58134 | 1.20965 | 17.5813 | 1.79735 | 17.58134 | 2.3969  |
| 63.847 | 0.24779 | 17.60102 | 0.11549 | 17.60102 | 0.67496 | 17.60102 | 1.22061 | 17.601  | 1.8     | 17.60102 | 2.40069 |
| 63.947 | 0.2476  | 17.62071 | 0.09857 | 17.62071 | 0.67753 | 17.62071 | 1.218   | 17.6207 | 1.79569 | 17.62071 | 2.39811 |
| 64.047 | 0.24759 | 17.6404  | 0.086   | 17.6404  | 0.6709  | 17.6404  | 1.22252 | 17.6404 | 1.79394 | 17.6404  | 2.39505 |
| 64.147 | 0.24756 | 17.66009 | 0.08263 | 17.66009 | 0.67491 | 17.66009 | 1.22073 | 17.6601 | 1.79731 | 17.66009 | 2.4     |
| 64.247 | 0.24755 | 17.67978 | 0.08439 | 17.67978 | 0.67572 | 17.67978 | 1.23495 | 17.6798 | 1.7965  | 17.67978 | 2.39712 |
| 64.347 | 0.24715 | 17.69947 | 0.0912  | 17.69947 | 0.68436 | 17.69947 | 1.24427 | 17.6995 | 1.79681 | 17.69947 | 2.39994 |
| 64.447 | 0.24716 | 17.71916 | 0.09251 | 17.71916 | 0.68699 | 17.71916 | 1.25317 | 17.7192 | 1.79712 | 17.71916 | 2.40179 |
| 64.547 | 0.24695 | 17.73885 | 0.10393 | 17.73885 | 0.7154  | 17.73885 | 1.26296 | 17.7389 | 1.80312 | 17.73885 | 2.40273 |
| 64.647 | 0.24711 | 17.75854 | 0.11042 | 17.75854 | 0.72767 | 17.75854 | 1.26923 | 17.7585 | 1.79656 | 17.75854 | 2.39785 |
| 64.747 | 0.24712 | 17.77823 | 0.11951 | 17.77823 | 0.74613 | 17.77823 | 1.27854 | 17.7782 | 1.80687 | 17.77823 | 2.39643 |
| 64.847 | 0.24675 | 17.79791 | 0.13125 | 17.79791 | 0.7676  | 17.79791 | 1.28549 | 17.7979 | 1.80787 | 17.79791 | 2.40252 |
| 64.947 | 0.24658 | 17.8176  | 0.14761 | 17.8176  | 0.77681 | 17.8176  | 1.30255 | 17.8176 | 1.80881 | 17.8176  | 2.40965 |
| 65.047 | 0.24649 | 17.83729 | 0.16844 | 17.83729 | 0.81518 | 17.83729 | 1.31089 | 17.8373 | 1.824   | 17.83729 | 2.40484 |
| 65.147 | 0.24631 | 17.85698 | 0.20043 | 17.85698 | 0.83184 | 17.85698 | 1.33116 | 17.857  | 1.83181 | 17.85698 | 2.41391 |
| 65.247 | 0.24638 | 17.87667 | 0.22101 | 17.87667 | 0.855   | 17.87667 | 1.3427  | 17.8767 | 1.84581 | 17.87667 | 2.42038 |
| 65.347 | 0.24614 | 17.89636 | 0.24858 | 17.89636 | 0.87617 | 17.89636 | 1.353   | 17.8964 | 1.86162 | 17.89636 | 2.42533 |

|        |         |          |         |          |         |          |         |         |         |          |         |
|--------|---------|----------|---------|----------|---------|----------|---------|---------|---------|----------|---------|
| 65.447 | 0.24648 | 17.91605 | 0.26371 | 17.91605 | 0.90716 | 17.91605 | 1.37291 | 17.9161 | 1.89393 | 17.91605 | 2.42652 |
| 65.547 | 0.24635 | 17.93574 | 0.27657 | 17.93574 | 0.94334 | 17.93574 | 1.38967 | 17.9357 | 1.91043 | 17.93574 | 2.43583 |
| 65.647 | 0.24643 | 17.95543 | 0.29312 | 17.95543 | 0.97339 | 17.95543 | 1.39883 | 17.9554 | 1.91306 | 17.95543 | 2.43787 |
| 65.747 | 0.24656 | 17.97512 | 0.31856 | 17.97512 | 1.01351 | 17.97512 | 1.41146 | 17.9751 | 1.89594 | 17.97512 | 2.43149 |
| 65.847 | 0.24665 | 17.99481 | 0.34283 | 17.99481 | 1.0333  | 17.99481 | 1.4057  | 17.9948 | 1.87045 | 17.99481 | 2.43686 |
| 65.947 | 0.24645 | 18.0145  | 0.3736  | 18.0145  | 1.08689 | 18.0145  | 1.38213 | 18.0145 | 1.84753 | 18.0145  | 2.4474  |
| 66.047 | 0.24608 | 18.03418 | 0.40397 | 18.03418 | 1.08779 | 18.03418 | 1.35304 | 18.0342 | 1.8366  | 18.03418 | 2.44799 |
| 66.147 | 0.24591 | 18.05387 | 0.44226 | 18.05387 | 1.06704 | 18.05387 | 1.3144  | 18.0539 | 1.82974 | 18.05387 | 2.45222 |
| 66.247 | 0.24631 | 18.07356 | 0.49449 | 18.07356 | 1.017   | 18.07356 | 1.28272 | 18.0736 | 1.8335  | 18.07356 | 2.45609 |
| 66.347 | 0.24631 | 18.09325 | 0.51955 | 18.09325 | 0.9261  | 18.09325 | 1.25492 | 18.0933 | 1.83163 | 18.09325 | 2.46384 |
| 66.447 | 0.2465  | 18.11294 | 0.56244 | 18.11294 | 0.8382  | 18.11294 | 1.2374  | 18.1129 | 1.83552 | 18.11294 | 2.4611  |
| 66.547 | 0.24632 | 18.13263 | 0.57616 | 18.13263 | 0.76494 | 18.13263 | 1.22534 | 18.1326 | 1.84127 | 18.13263 | 2.46376 |
| 66.647 | 0.24632 | 18.15232 | 0.54422 | 18.15232 | 0.71259 | 18.15232 | 1.22388 | 18.1523 | 1.84684 | 18.15232 | 2.46872 |
| 66.747 | 0.24668 | 18.17201 | 0.45242 | 18.17201 | 0.66837 | 18.17201 | 1.21694 | 18.172  | 1.84429 | 18.17201 | 2.47428 |
| 66.847 | 0.24647 | 18.1917  | 0.34649 | 18.1917  | 0.6433  | 18.1917  | 1.21284 | 18.1917 | 1.84224 | 18.1917  | 2.48052 |
| 66.947 | 0.24642 | 18.21139 | 0.22916 | 18.21139 | 0.63833 | 18.21139 | 1.21071 | 18.2114 | 1.86213 | 18.21139 | 2.48809 |
| 67.047 | 0.24658 | 18.23108 | 0.12681 | 18.23108 | 0.61959 | 18.23108 | 1.20899 | 18.2311 | 1.87189 | 18.23108 | 2.4967  |
| 67.147 | 0.24689 | 18.25076 | 0.0716  | 18.25076 | 0.62676 | 18.25076 | 1.21553 | 18.2508 | 1.8751  | 18.25076 | 2.50974 |
| 67.247 | 0.24713 | 18.27045 | 0.03948 | 18.27045 | 0.62617 | 18.27045 | 1.21293 | 18.2705 | 1.90317 | 18.27045 | 2.51774 |
| 67.347 | 0.24676 | 18.29014 | 0.02084 | 18.29014 | 0.61926 | 18.29014 | 1.21545 | 18.2901 | 1.91812 | 18.29014 | 2.52465 |
| 67.447 | 0.24658 | 18.30983 | 0.02497 | 18.30983 | 0.61347 | 18.30983 | 1.21579 | 18.3098 | 1.93539 | 18.30983 | 2.54393 |
| 67.547 | 0.24682 | 18.32952 | 0.01236 | 18.32952 | 0.61664 | 18.32952 | 1.22012 | 18.3295 | 1.95521 | 18.32952 | 2.55114 |
| 67.647 | 0.24687 | 18.34921 | 0.01571 | 18.34921 | 0.61166 | 18.34921 | 1.22103 | 18.3492 | 1.96392 | 18.34921 | 2.56757 |
| 67.747 | 0.24694 | 18.3689  | 0.01154 | 18.3689  | 0.61639 | 18.3689  | 1.22483 | 18.3689 | 1.96612 | 18.3689  | 2.58915 |
| 67.847 | 0.24699 | 18.38859 | 0.01495 | 18.38859 | 0.61067 | 18.38859 | 1.23009 | 18.3886 | 1.97364 | 18.38859 | 2.61072 |
| 67.947 | 0.24699 | 18.40828 | 0.01072 | 18.40828 | 0.61097 | 18.40828 | 1.23034 | 18.4083 | 1.98166 | 18.40828 | 2.62971 |
| 68.047 | 0.24737 | 18.42797 | 0.01097 | 18.42797 | 0.61202 | 18.42797 | 1.23058 | 18.428  | 1.98644 | 18.42797 | 2.65646 |
| 68.147 | 0.24738 | 18.44765 | 0.01874 | 18.44765 | 0.61444 | 18.44765 | 1.23011 | 18.4477 | 1.99265 | 18.44765 | 2.68557 |
| 68.247 | 0.24741 | 18.46734 | 0.01653 | 18.46734 | 0.61311 | 18.46734 | 1.23454 | 18.4673 | 1.99518 | 18.46734 | 2.71564 |
| 68.347 | 0.24759 | 18.48703 | 0.01898 | 18.48703 | 0.62054 | 18.48703 | 1.23138 | 18.487  | 1.99276 | 18.48703 | 2.75002 |
| 68.447 | 0.24792 | 18.50672 | 0.02428 | 18.50672 | 0.62541 | 18.50672 | 1.22993 | 18.5067 | 1.98973 | 18.50672 | 2.76647 |
| 68.547 | 0.24797 | 18.52641 | 0.02823 | 18.52641 | 0.62733 | 18.52641 | 1.22589 | 18.5264 | 1.98894 | 18.52641 | 2.77745 |
| 68.647 | 0.24796 | 18.5461  | 0.03036 | 18.5461  | 0.624   | 18.5461  | 1.22211 | 18.5461 | 1.97572 | 18.5461  | 2.76965 |
| 68.747 | 0.24812 | 18.56579 | 0.02736 | 18.56579 | 0.62354 | 18.56579 | 1.22133 | 18.5658 | 1.96894 | 18.56579 | 2.74203 |
| 68.847 | 0.24826 | 18.58548 | 0.03364 | 18.58548 | 0.63085 | 18.58548 | 1.21249 | 18.5855 | 1.96828 | 18.58548 | 2.70532 |
| 68.947 | 0.24804 | 18.60517 | 0.04518 | 18.60517 | 0.6418  | 18.60517 | 1.20742 | 18.6052 | 1.94982 | 18.60517 | 2.65972 |
| 69.047 | 0.24812 | 18.62486 | 0.03922 | 18.62486 | 0.64111 | 18.62486 | 1.20613 | 18.6249 | 1.92586 | 18.62486 | 2.61248 |
| 69.147 | 0.24782 | 18.64455 | 0.05744 | 18.64455 | 0.64248 | 18.64455 | 1.20814 | 18.6446 | 1.91252 | 18.64455 | 2.57427 |
| 69.247 | 0.24822 | 18.66424 | 0.05621 | 18.66424 | 0.64529 | 18.66424 | 1.20628 | 18.6642 | 1.894   | 18.66424 | 2.55279 |
| 69.347 | 0.24838 | 18.68392 | 0.06049 | 18.68392 | 0.64942 | 18.68392 | 1.20596 | 18.6839 | 1.88848 | 18.68392 | 2.53731 |
| 69.447 | 0.24855 | 18.70361 | 0.06918 | 18.70361 | 0.64478 | 18.70361 | 1.20162 | 18.7036 | 1.88645 | 18.70361 | 2.5428  |
| 69.547 | 0.24868 | 18.7233  | 0.06406 | 18.7233  | 0.64659 | 18.7233  | 1.20554 | 18.7233 | 1.87968 | 18.7233  | 2.52295 |
| 69.647 | 0.24885 | 18.74299 | 0.07748 | 18.74299 | 0.65297 | 18.74299 | 1.20921 | 18.743  | 1.87709 | 18.74299 | 2.53153 |
| 69.747 | 0.24897 | 18.76268 | 0.0754  | 18.76268 | 0.64646 | 18.76268 | 1.20631 | 18.7627 | 1.88975 | 18.76268 | 2.52914 |

|        |         |          |         |          |         |          |         |         |         |          |         |
|--------|---------|----------|---------|----------|---------|----------|---------|---------|---------|----------|---------|
| 69.847 | 0.2492  | 18.78237 | 0.08636 | 18.78237 | 0.6412  | 18.78237 | 1.21855 | 18.7824 | 1.89116 | 18.78237 | 2.525   |
| 69.947 | 0.24915 | 18.80206 | 0.08683 | 18.80206 | 0.6342  | 18.80206 | 1.21648 | 18.8021 | 1.89715 | 18.80206 | 2.52311 |
| 70.047 | 0.24908 | 18.82175 | 0.08477 | 18.82175 | 0.6332  | 18.82175 | 1.21328 | 18.8218 | 1.90838 | 18.82175 | 2.50783 |
| 70.147 | 0.24918 | 18.84144 | 0.07492 | 18.84144 | 0.62902 | 18.84144 | 1.22041 | 18.8414 | 1.91399 | 18.84144 | 2.51145 |
| 70.247 | 0.24909 | 18.86113 | 0.07753 | 18.86113 | 0.63047 | 18.86113 | 1.22264 | 18.8611 | 1.91217 | 18.86113 | 2.50702 |
| 70.347 | 0.24933 | 18.88082 | 0.06393 | 18.88082 | 0.62609 | 18.88082 | 1.22667 | 18.8808 | 1.92228 | 18.88082 | 2.50592 |
| 70.447 | 0.2496  | 18.90051 | 0.05142 | 18.90051 | 0.62316 | 18.90051 | 1.22925 | 18.9005 | 1.92189 | 18.90051 | 2.50415 |
| 70.547 | 0.24961 | 18.92019 | 0.04845 | 18.92019 | 0.63099 | 18.92019 | 1.23685 | 18.9202 | 1.91675 | 18.92019 | 2.51051 |
| 70.647 | 0.2501  | 18.93988 | 0.039   | 18.93988 | 0.62205 | 18.93988 | 1.24191 | 18.9399 | 1.91924 | 18.93988 | 2.51874 |
| 70.747 | 0.25018 | 18.95957 | 0.03998 | 18.95957 | 0.6183  | 18.95957 | 1.24636 | 18.9596 | 1.91885 | 18.95957 | 2.52807 |
| 70.847 | 0.25018 | 18.97926 | 0.0326  | 18.97926 | 0.61756 | 18.97926 | 1.24982 | 18.9793 | 1.92096 | 18.97926 | 2.53139 |
| 70.947 | 0.25061 | 18.99895 | 0.03029 | 18.99895 | 0.61376 | 18.99895 | 1.25556 | 18.999  | 1.91577 | 18.99895 | 2.54661 |
| 71.047 | 0.25045 | 19.01864 | 0.02526 | 19.01864 | 0.61121 | 19.01864 | 1.24849 | 19.0186 | 1.92339 | 19.01864 | 2.54583 |
| 71.147 | 0.25038 | 19.03833 | 0.02055 | 19.03833 | 0.61511 | 19.03833 | 1.24907 | 19.0383 | 1.92171 | 19.03833 | 2.54997 |
| 71.247 | 0.2504  | 19.05802 | 0.01455 | 19.05802 | 0.61038 | 19.05802 | 1.24691 | 19.058  | 1.91846 | 19.05802 | 2.54955 |
| 71.347 | 0.25061 | 19.07771 | 0.02073 | 19.07771 | 0.6169  | 19.07771 | 1.24192 | 19.0777 | 1.91939 | 19.07771 | 2.54714 |
| 71.447 | 0.25068 | 19.09739 | 0.02782 | 19.09739 | 0.61098 | 19.09739 | 1.23841 | 19.0974 | 1.92208 | 19.09739 | 2.55194 |
| 71.547 | 0.25062 | 19.11708 | 0.01352 | 19.11708 | 0.61882 | 19.11708 | 1.22959 | 19.1171 | 1.91477 | 19.11708 | 2.54892 |
| 71.647 | 0.25077 | 19.13677 | 0.0175  | 19.13677 | 0.62028 | 19.13677 | 1.22573 | 19.1368 | 1.90952 | 19.13677 | 2.55135 |
| 71.747 | 0.25077 | 19.15646 | 0.0146  | 19.15646 | 0.61917 | 19.15646 | 1.22435 | 19.1565 | 1.90433 | 19.15646 | 2.54718 |
| 71.847 | 0.25085 | 19.17615 | 0.02338 | 19.17615 | 0.62294 | 19.17615 | 1.22596 | 19.1762 | 1.89908 | 19.17615 | 2.54179 |
| 71.947 | 0.25092 | 19.19584 | 0.02277 | 19.19584 | 0.6363  | 19.19584 | 1.22091 | 19.1958 | 1.89796 | 19.19584 | 2.54952 |
| 72.047 | 0.25107 | 19.21553 | 0.02754 | 19.21553 | 0.64209 | 19.21553 | 1.22103 | 19.2155 | 1.88879 | 19.21553 | 2.54428 |
| 72.147 | 0.25093 | 19.23522 | 0.02965 | 19.23522 | 0.64331 | 19.23522 | 1.22219 | 19.2352 | 1.88762 | 19.23522 | 2.54413 |
| 72.247 | 0.25114 | 19.25491 | 0.04078 | 19.25491 | 0.65072 | 19.25491 | 1.22747 | 19.2549 | 1.88838 | 19.25491 | 2.5464  |
| 72.347 | 0.25148 | 19.2746  | 0.04723 | 19.2746  | 0.66433 | 19.2746  | 1.22738 | 19.2746 | 1.88277 | 19.2746  | 2.55079 |
| 72.447 | 0.25254 | 19.29429 | 0.05012 | 19.29429 | 0.67225 | 19.29429 | 1.23788 | 19.2943 | 1.88653 | 19.29429 | 2.54064 |
| 72.547 | 0.25214 | 19.31398 | 0.06657 | 19.31398 | 0.67184 | 19.31398 | 1.23088 | 19.314  | 1.88435 | 19.31398 | 2.54067 |
| 72.647 | 0.25235 | 19.33366 | 0.06913 | 19.33366 | 0.68414 | 19.33366 | 1.23699 | 19.3337 | 1.89561 | 19.33366 | 2.53482 |
| 72.747 | 0.25247 | 19.35335 | 0.07656 | 19.35335 | 0.69086 | 19.35335 | 1.2399  | 19.3534 | 1.88444 | 19.35335 | 2.5334  |
| 72.847 | 0.25247 | 19.37304 | 0.09346 | 19.37304 | 0.70247 | 19.37304 | 1.25329 | 19.373  | 1.90482 | 19.37304 | 2.51833 |
| 72.947 | 0.25257 | 19.39273 | 0.10706 | 19.39273 | 0.72348 | 19.39273 | 1.2529  | 19.3927 | 1.89104 | 19.39273 | 2.52408 |
| 73.047 | 0.25305 | 19.41242 | 0.11813 | 19.41242 | 0.72934 | 19.41242 | 1.25922 | 19.4124 | 1.89838 | 19.41242 | 2.52128 |
| 73.147 | 0.25344 | 19.43211 | 0.13614 | 19.43211 | 0.74684 | 19.43211 | 1.26838 | 19.4321 | 1.89922 | 19.43211 | 2.52509 |
| 73.247 | 0.2537  | 19.4518  | 0.1559  | 19.4518  | 0.75795 | 19.4518  | 1.27161 | 19.4518 | 1.90137 | 19.4518  | 2.52568 |
| 73.347 | 0.25361 | 19.47149 | 0.1754  | 19.47149 | 0.75218 | 19.47149 | 1.26352 | 19.4715 | 1.90708 | 19.47149 | 2.53925 |
| 73.447 | 0.25371 | 19.49118 | 0.20139 | 19.49118 | 0.74802 | 19.49118 | 1.26969 | 19.4912 | 1.90111 | 19.49118 | 2.53918 |
| 73.547 | 0.25352 | 19.51087 | 0.22335 | 19.51087 | 0.74913 | 19.51087 | 1.27116 | 19.5109 | 1.90644 | 19.51087 | 2.54523 |
| 73.647 | 0.25322 | 19.53056 | 0.2269  | 19.53056 | 0.73741 | 19.53056 | 1.27909 | 19.5306 | 1.90153 | 19.53056 | 2.54637 |
| 73.747 | 0.25352 | 19.55025 | 0.23655 | 19.55025 | 0.72743 | 19.55025 | 1.27395 | 19.5503 | 1.90068 | 19.55025 | 2.5406  |
| 73.847 | 0.25368 | 19.56993 | 0.23361 | 19.56993 | 0.73042 | 19.56993 | 1.27108 | 19.5699 | 1.90115 | 19.56993 | 2.5401  |
| 73.947 | 0.25363 | 19.58962 | 0.23134 | 19.58962 | 0.72302 | 19.58962 | 1.27395 | 19.5896 | 1.89394 | 19.58962 | 2.54175 |
| 74.047 | 0.25362 | 19.60931 | 0.19917 | 19.60931 | 0.72032 | 19.60931 | 1.27129 | 19.6093 | 1.89479 | 19.60931 | 2.52249 |
| 74.147 | 0.25365 | 19.629   | 0.17471 | 19.629   | 0.71711 | 19.629   | 1.26342 | 19.629  | 1.88671 | 19.629   | 2.52195 |

|        |         |          |         |          |         |          |         |         |         |          |         |
|--------|---------|----------|---------|----------|---------|----------|---------|---------|---------|----------|---------|
| 74.247 | 0.25372 | 19.64869 | 0.15104 | 19.64869 | 0.71385 | 19.64869 | 1.25364 | 19.6487 | 1.8805  | 19.64869 | 2.5085  |
| 74.347 | 0.25402 | 19.66838 | 0.13774 | 19.66838 | 0.71384 | 19.66838 | 1.24717 | 19.6684 | 1.88129 | 19.66838 | 2.49572 |
| 74.447 | 0.25411 | 19.68807 | 0.10628 | 19.68807 | 0.71495 | 19.68807 | 1.23599 | 19.6881 | 1.8847  | 19.68807 | 2.48767 |
| 74.547 | 0.25397 | 19.70776 | 0.11483 | 19.70776 | 0.71588 | 19.70776 | 1.23726 | 19.7078 | 1.87443 | 19.70776 | 2.4798  |
| 74.647 | 0.25371 | 19.72745 | 0.10458 | 19.72745 | 0.7143  | 19.72745 | 1.23006 | 19.7275 | 1.86547 | 19.72745 | 2.47405 |
| 74.747 | 0.25356 | 19.74714 | 0.09796 | 19.74714 | 0.71173 | 19.74714 | 1.22885 | 19.7471 | 1.8707  | 19.74714 | 2.46903 |
| 74.847 | 0.25352 | 19.76682 | 0.10495 | 19.76682 | 0.71503 | 19.76682 | 1.23275 | 19.7668 | 1.86468 | 19.76682 | 2.46819 |
| 74.947 | 0.25387 | 19.78651 | 0.09341 | 19.78651 | 0.70971 | 19.78651 | 1.23248 | 19.7865 | 1.85736 | 19.78651 | 2.46041 |
| 75.047 | 0.2538  | 19.8062  | 0.09504 | 19.8062  | 0.69669 | 19.8062  | 1.23443 | 19.8062 | 1.86016 | 19.8062  | 2.46243 |
| 75.147 | 0.25389 | 19.82589 | 0.10055 | 19.82589 | 0.68492 | 19.82589 | 1.23596 | 19.8259 | 1.85697 | 19.82589 | 2.46652 |
| 75.247 | 0.25395 | 19.84558 | 0.10231 | 19.84558 | 0.68386 | 19.84558 | 1.23409 | 19.8456 | 1.85671 | 19.84558 | 2.47686 |
| 75.347 | 0.25375 | 19.86527 | 0.0907  | 19.86527 | 0.66871 | 19.86527 | 1.23758 | 19.8653 | 1.85814 | 19.86527 | 2.4847  |
| 75.447 | 0.25355 | 19.88496 | 0.08818 | 19.88496 | 0.66001 | 19.88496 | 1.23736 | 19.885  | 1.85682 | 19.88496 | 2.49134 |
| 75.547 | 0.2533  | 19.90465 | 0.0804  | 19.90465 | 0.64993 | 19.90465 | 1.23972 | 19.9047 | 1.86724 | 19.90465 | 2.49203 |
| 75.647 | 0.25357 | 19.92434 | 0.07703 | 19.92434 | 0.64073 | 19.92434 | 1.23832 | 19.9243 | 1.87061 | 19.92434 | 2.51352 |
| 75.747 | 0.25338 | 19.94403 | 0.05978 | 19.94403 | 0.63835 | 19.94403 | 1.23784 | 19.944  | 1.86641 | 19.94403 | 2.51445 |
| 75.847 | 0.25359 | 19.96372 | 0.05349 | 19.96372 | 0.63184 | 19.96372 | 1.23002 | 19.9637 | 1.88603 | 19.96372 | 2.53291 |
| 75.947 | 0.25359 | 19.9834  | 0.04041 | 19.9834  | 0.62597 | 19.9834  | 1.22733 | 19.9834 | 1.89091 | 19.9834  | 2.54399 |
| 76.047 | 0.25381 | 20.00309 | 0.03102 | 20.00309 | 0.62409 | 20.00309 | 1.22371 | 20.0031 | 1.89166 | 20.00309 | 2.54161 |
| 76.147 | 0.25361 | 20.02278 | 0.03388 | 20.02278 | 0.61947 | 20.02278 | 1.22256 | 20.0228 | 1.90498 | 20.02278 | 2.54263 |
| 76.247 | 0.25343 | 20.04247 | 0.02974 | 20.04247 | 0.61353 | 20.04247 | 1.22116 | 20.0425 | 1.90779 | 20.04247 | 2.5497  |
| 76.347 | 0.25321 | 20.06216 | 0.02723 | 20.06216 | 0.62274 | 20.06216 | 1.21965 | 20.0622 | 1.91499 | 20.06216 | 2.55054 |
| 76.447 | 0.2533  | 20.08185 | 0.02503 | 20.08185 | 0.62093 | 20.08185 | 1.22052 | 20.0819 | 1.91712 | 20.08185 | 2.55119 |
| 76.547 | 0.25351 | 20.10154 | 0.02258 | 20.10154 | 0.61843 | 20.10154 | 1.22025 | 20.1015 | 1.90919 | 20.10154 | 2.56621 |
| 76.647 | 0.25323 | 20.12123 | 0.02551 | 20.12123 | 0.62382 | 20.12123 | 1.2109  | 20.1212 | 1.91207 | 20.12123 | 2.56038 |
| 76.747 | 0.25324 | 20.14092 | 0.01826 | 20.14092 | 0.62045 | 20.14092 | 1.21115 | 20.1409 | 1.91945 | 20.14092 | 2.56589 |
| 76.847 | 0.2533  | 20.16061 | 0.02326 | 20.16061 | 0.62502 | 20.16061 | 1.21047 | 20.1606 | 1.92308 | 20.16061 | 2.57254 |
| 76.947 | 0.25308 | 20.1803  | 0.02348 | 20.1803  | 0.62441 | 20.1803  | 1.2147  | 20.1803 | 1.91078 | 20.1803  | 2.57491 |
| 77.047 | 0.25271 | 20.19999 | 0.02641 | 20.19999 | 0.62505 | 20.19999 | 1.21449 | 20.2    | 1.91936 | 20.19999 | 2.57528 |
| 77.147 | 0.25292 | 20.21968 | 0.02585 | 20.21968 | 0.62506 | 20.21968 | 1.21361 | 20.2197 | 1.90364 | 20.21968 | 2.57152 |
| 77.247 | 0.25294 | 20.23936 | 0.0306  | 20.23936 | 0.62789 | 20.23936 | 1.21216 | 20.2394 | 1.89384 | 20.23936 | 2.56129 |
| 77.347 | 0.25326 | 20.25905 | 0.03186 | 20.25905 | 0.63454 | 20.25905 | 1.21169 | 20.2591 | 1.89505 | 20.25905 | 2.54996 |
| 77.447 | 0.25306 | 20.27874 | 0.02539 | 20.27874 | 0.63543 | 20.27874 | 1.21076 | 20.2787 | 1.88613 | 20.27874 | 2.52536 |
| 77.547 | 0.25278 | 20.29843 | 0.02658 | 20.29843 | 0.62999 | 20.29843 | 1.21607 | 20.2984 | 1.8884  | 20.29843 | 2.51009 |
| 77.647 | 0.25267 | 20.31812 | 0.02355 | 20.31812 | 0.63057 | 20.31812 | 1.21338 | 20.3181 | 1.8693  | 20.31812 | 2.47816 |
| 77.747 | 0.25296 | 20.33781 | 0.02798 | 20.33781 | 0.63459 | 20.33781 | 1.22113 | 20.3378 | 1.86213 | 20.33781 | 2.4641  |
| 77.847 | 0.25279 | 20.3575  | 0.01704 | 20.3575  | 0.62872 | 20.3575  | 1.21229 | 20.3575 | 1.85228 | 20.3575  | 2.45053 |
| 77.947 | 0.2527  | 20.37719 | 0.01706 | 20.37719 | 0.63093 | 20.37719 | 1.21622 | 20.3772 | 1.83819 | 20.37719 | 2.43789 |
| 78.047 | 0.2524  | 20.39688 | 0.01223 | 20.39688 | 0.62932 | 20.39688 | 1.21343 | 20.3969 | 1.83391 | 20.39688 | 2.42476 |
| 78.147 | 0.25243 | 20.41656 | 0.02062 | 20.41656 | 0.62978 | 20.41656 | 1.20863 | 20.4166 | 1.82663 | 20.41656 | 2.42205 |
| 78.247 | 0.25235 | 20.43625 | 0.01695 | 20.43625 | 0.63086 | 20.43625 | 1.20864 | 20.4363 | 1.82004 | 20.43625 | 2.42226 |
| 78.347 | 0.25194 | 20.45594 | 0.01632 | 20.45594 | 0.62738 | 20.45594 | 1.20554 | 20.4559 | 1.82363 | 20.45594 | 2.4184  |
| 78.447 | 0.25201 | 20.47563 | 0.01739 | 20.47563 | 0.62533 | 20.47563 | 1.20296 | 20.4756 | 1.81591 | 20.47563 | 2.42073 |
| 78.547 | 0.25194 | 20.49532 | 0.02377 | 20.49532 | 0.62485 | 20.49532 | 1.20539 | 20.4953 | 1.8112  | 20.49532 | 2.42099 |

|        |         |          |         |          |         |          |         |         |         |          |         |
|--------|---------|----------|---------|----------|---------|----------|---------|---------|---------|----------|---------|
| 78.647 | 0.25195 | 20.51501 | 0.02587 | 20.51501 | 0.62882 | 20.51501 | 1.20916 | 20.515  | 1.80873 | 20.51501 | 2.41265 |
| 78.747 | 0.25182 | 20.5347  | 0.03167 | 20.5347  | 0.62101 | 20.5347  | 1.2103  | 20.5347 | 1.80614 | 20.5347  | 2.41813 |
| 78.847 | 0.25196 | 20.55439 | 0.04168 | 20.55439 | 0.62917 | 20.55439 | 1.20854 | 20.5544 | 1.80898 | 20.55439 | 2.41973 |
| 78.947 | 0.25197 | 20.57408 | 0.03607 | 20.57408 | 0.62606 | 20.57408 | 1.21155 | 20.5741 | 1.81278 | 20.57408 | 2.42025 |
| 79.047 | 0.25225 | 20.59377 | 0.04038 | 20.59377 | 0.6371  | 20.59377 | 1.21382 | 20.5938 | 1.81545 | 20.59377 | 2.42047 |
| 79.147 | 0.25246 | 20.61346 | 0.04242 | 20.61346 | 0.63688 | 20.61346 | 1.21419 | 20.6135 | 1.81137 | 20.61346 | 2.42517 |
| 79.247 | 0.25268 | 20.63315 | 0.05036 | 20.63315 | 0.6426  | 20.63315 | 1.21306 | 20.6332 | 1.81098 | 20.63315 | 2.42206 |
| 79.347 | 0.25234 | 20.65283 | 0.04981 | 20.65283 | 0.64268 | 20.65283 | 1.21653 | 20.6528 | 1.81227 | 20.65283 | 2.42422 |
| 79.447 | 0.25296 | 20.67252 | 0.05814 | 20.67252 | 0.65785 | 20.67252 | 1.21519 | 20.6725 | 1.81413 | 20.67252 | 2.42565 |
| 79.547 | 0.25311 | 20.69221 | 0.0574  | 20.69221 | 0.66351 | 20.69221 | 1.21102 | 20.6922 | 1.81492 | 20.69221 | 2.43151 |
| 79.647 | 0.25271 | 20.7119  | 0.06035 | 20.7119  | 0.66197 | 20.7119  | 1.20958 | 20.7119 | 1.81578 | 20.7119  | 2.43245 |
| 79.747 | 0.25272 | 20.73159 | 0.04994 | 20.73159 | 0.66412 | 20.73159 | 1.21165 | 20.7316 | 1.81626 | 20.73159 | 2.43728 |
| 79.847 | 0.25265 | 20.75128 | 0.05438 | 20.75128 | 0.66809 | 20.75128 | 1.21047 | 20.7513 | 1.81237 | 20.75128 | 2.43731 |
| 79.947 | 0.25253 | 20.77097 | 0.05649 | 20.77097 | 0.67844 | 20.77097 | 1.21487 | 20.771  | 1.81155 | 20.77097 | 2.43803 |
| 80.047 | 0.25245 | 20.79066 | 0.06191 | 20.79066 | 0.6806  | 20.79066 | 1.21142 | 20.7907 | 1.80617 | 20.79066 | 2.43857 |
| 80.147 | 0.25231 | 20.81035 | 0.05623 | 20.81035 | 0.68751 | 20.81035 | 1.21226 | 20.8104 | 1.81323 | 20.81035 | 2.44147 |
| 80.247 | 0.25237 | 20.83004 | 0.04803 | 20.83004 | 0.69117 | 20.83004 | 1.21175 | 20.83   | 1.80866 | 20.83004 | 2.45231 |
| 80.347 | 0.25288 | 20.84973 | 0.05909 | 20.84973 | 0.69389 | 20.84973 | 1.21377 | 20.8497 | 1.81153 | 20.84973 | 2.4563  |
| 80.447 | 0.25291 | 20.86942 | 0.07288 | 20.86942 | 0.70199 | 20.86942 | 1.21151 | 20.8694 | 1.80996 | 20.86942 | 2.45829 |
| 80.547 | 0.2529  | 20.8891  | 0.0698  | 20.8891  | 0.70803 | 20.8891  | 1.21509 | 20.8891 | 1.81739 | 20.8891  | 2.45889 |
| 80.647 | 0.25284 | 20.90879 | 0.08819 | 20.90879 | 0.71294 | 20.90879 | 1.21443 | 20.9088 | 1.82451 | 20.90879 | 2.46682 |
| 80.747 | 0.253   | 20.92848 | 0.10476 | 20.92848 | 0.71735 | 20.92848 | 1.21309 | 20.9285 | 1.83175 | 20.92848 | 2.47299 |
| 80.847 | 0.25318 | 20.94817 | 0.11082 | 20.94817 | 0.72914 | 20.94817 | 1.2193  | 20.9482 | 1.83556 | 20.94817 | 2.48359 |
| 80.947 | 0.25335 | 20.96786 | 0.13025 | 20.96786 | 0.743   | 20.96786 | 1.22293 | 20.9679 | 1.851   | 20.96786 | 2.48365 |
| 81.047 | 0.25347 | 20.98755 | 0.14222 | 20.98755 | 0.73527 | 20.98755 | 1.22212 | 20.9876 | 1.85519 | 20.98755 | 2.49886 |
| 81.147 | 0.25367 | 21.00724 | 0.15769 | 21.00724 | 0.74087 | 21.00724 | 1.22807 | 21.0072 | 1.86076 | 21.00724 | 2.49832 |
| 81.247 | 0.25393 | 21.02693 | 0.17063 | 21.02693 | 0.73671 | 21.02693 | 1.23056 | 21.0269 | 1.86508 | 21.02693 | 2.50856 |
| 81.347 | 0.25399 | 21.04662 | 0.17307 | 21.04662 | 0.73136 | 21.04662 | 1.23424 | 21.0466 | 1.87464 | 21.04662 | 2.51608 |
| 81.447 | 0.25389 | 21.06631 | 0.19425 | 21.06631 | 0.71725 | 21.06631 | 1.2342  | 21.0663 | 1.8824  | 21.06631 | 2.5233  |
| 81.547 | 0.25384 | 21.08599 | 0.2011  | 21.08599 | 0.70589 | 21.08599 | 1.24165 | 21.086  | 1.88403 | 21.08599 | 2.53136 |
| 81.647 | 0.25395 | 21.10568 | 0.22383 | 21.10568 | 0.69071 | 21.10568 | 1.24301 | 21.1057 | 1.89035 | 21.10568 | 2.53882 |
| 81.747 | 0.25487 | 21.12537 | 0.22731 | 21.12537 | 0.66715 | 21.12537 | 1.24576 | 21.1254 | 1.89085 | 21.12537 | 2.54391 |
| 81.847 | 0.25466 | 21.14506 | 0.2278  | 21.14506 | 0.66675 | 21.14506 | 1.24438 | 21.1451 | 1.89548 | 21.14506 | 2.55803 |
| 81.947 | 0.25457 | 21.16475 | 0.2266  | 21.16475 | 0.6537  | 21.16475 | 1.25606 | 21.1648 | 1.89263 | 21.16475 | 2.56271 |
| 82.047 | 0.25483 | 21.18444 | 0.2151  | 21.18444 | 0.64072 | 21.18444 | 1.2472  | 21.1844 | 1.90176 | 21.18444 | 2.57575 |
| 82.147 | 0.25507 | 21.20413 | 0.18213 | 21.20413 | 0.6445  | 21.20413 | 1.24737 | 21.2041 | 1.88866 | 21.20413 | 2.58607 |
| 82.247 | 0.25533 | 21.22382 | 0.14994 | 21.22382 | 0.64616 | 21.22382 | 1.24279 | 21.2238 | 1.89611 | 21.22382 | 2.60747 |
| 82.347 | 0.25566 | 21.24351 | 0.11386 | 21.24351 | 0.63631 | 21.24351 | 1.24089 | 21.2435 | 1.89769 | 21.24351 | 2.62215 |
| 82.447 | 0.25554 | 21.2632  | 0.08706 | 21.2632  | 0.62733 | 21.2632  | 1.23838 | 21.2632 | 1.90702 | 21.2632  | 2.65537 |
| 82.547 | 0.25587 | 21.28289 | 0.05772 | 21.28289 | 0.62711 | 21.28289 | 1.23597 | 21.2829 | 1.90035 | 21.28289 | 2.66842 |
| 82.647 | 0.25597 | 21.30257 | 0.04103 | 21.30257 | 0.62132 | 21.30257 | 1.23325 | 21.3026 | 1.91436 | 21.30257 | 2.70231 |
| 82.747 | 0.25621 | 21.32226 | 0.02745 | 21.32226 | 0.61679 | 21.32226 | 1.23414 | 21.3223 | 1.91232 | 21.32226 | 2.70941 |
| 82.847 | 0.25626 | 21.34195 | 0.01284 | 21.34195 | 0.60912 | 21.34195 | 1.2324  | 21.342  | 1.92433 | 21.34195 | 2.74657 |
| 82.947 | 0.25669 | 21.36164 | 0.01022 | 21.36164 | 0.61316 | 21.36164 | 1.23288 | 21.3616 | 1.92786 | 21.36164 | 2.77235 |

|        |         |          |           |          |         |          |         |         |         |          |         |
|--------|---------|----------|-----------|----------|---------|----------|---------|---------|---------|----------|---------|
| 83.047 | 0.25671 | 21.38133 | 7.23E-04  | 21.38133 | 0.61107 | 21.38133 | 1.2281  | 21.3813 | 1.96282 | 21.38133 | 2.78964 |
| 83.147 | 0.25712 | 21.40102 | 0.00355   | 21.40102 | 0.6121  | 21.40102 | 1.23044 | 21.401  | 1.98459 | 21.40102 | 2.81814 |
| 83.247 | 0.25726 | 21.42071 | -0.00173  | 21.42071 | 0.60932 | 21.42071 | 1.23134 | 21.4207 | 2.00224 | 21.42071 | 2.82531 |
| 83.347 | 0.25735 | 21.4404  | -0.00772  | 21.4404  | 0.60284 | 21.4404  | 1.22795 | 21.4404 | 2.04026 | 21.4404  | 2.852   |
| 83.447 | 0.25756 | 21.46009 | -0.00132  | 21.46009 | 0.60744 | 21.46009 | 1.23715 | 21.4601 | 2.06103 | 21.46009 | 2.8739  |
| 83.547 | 0.25794 | 21.47978 | -0.00349  | 21.47978 | 0.5999  | 21.47978 | 1.24068 | 21.4798 | 2.0883  | 21.47978 | 2.88252 |
| 83.647 | 0.25801 | 21.49947 | -0.0065   | 21.49947 | 0.6025  | 21.49947 | 1.24086 | 21.4995 | 2.1112  | 21.49947 | 2.89266 |
| 83.747 | 0.25808 | 21.51916 | -0.00218  | 21.51916 | 0.60297 | 21.51916 | 1.24407 | 21.5192 | 2.11897 | 21.51916 | 2.90777 |
| 83.847 | 0.25844 | 21.53884 | 0         | 21.53884 | 0.6     | 21.53884 | 1.24843 | 21.5388 | 2.14893 | 21.53884 | 2.91446 |
| 83.947 | 0.25853 | 21.55853 | -1.21E-04 | 21.55853 | 0.59864 | 21.55853 | 1.25604 | 21.5585 | 2.16322 | 21.55853 | 2.90212 |
| 84.047 | 0.25862 | 21.57822 | 5.35E-04  | 21.57822 | 0.60391 | 21.57822 | 1.2494  | 21.5782 | 2.15894 | 21.57822 | 2.89584 |
| 84.147 | 0.25877 | 21.59791 | -0.00134  | 21.59791 | 0.60718 | 21.59791 | 1.24239 | 21.5979 | 2.16566 | 21.59791 | 2.88986 |
| 84.247 | 0.25896 | 21.6176  | 2.93E-04  | 21.6176  | 0.60207 | 21.6176  | 1.24763 | 21.6176 | 2.18394 | 21.6176  | 2.86607 |
| 84.347 | 0.25909 | 21.63729 | 0.00406   | 21.63729 | 0.60353 | 21.63729 | 1.23969 | 21.6373 | 2.18973 | 21.63729 | 2.84221 |
| 84.447 | 0.25948 | 21.65698 | 0.00174   | 21.65698 | 0.60467 | 21.65698 | 1.23233 | 21.657  | 2.19108 | 21.65698 | 2.79696 |
| 84.547 | 0.25975 | 21.67667 | 0.00557   | 21.67667 | 0.60137 | 21.67667 | 1.22821 | 21.6767 | 2.18855 | 21.67667 | 2.75238 |
| 84.647 | 0.25961 | 21.69636 | 0.01252   | 21.69636 | 0.60289 | 21.69636 | 1.21625 | 21.6964 | 2.17609 | 21.69636 | 2.70889 |
| 84.747 | 0.26021 | 21.71605 | 0.01181   | 21.71605 | 0.60979 | 21.71605 | 1.20687 | 21.7161 | 2.16469 | 21.71605 | 2.65437 |
| 84.847 | 0.26062 | 21.73573 | 0.00851   | 21.73573 | 0.6053  | 21.73573 | 1.20658 | 21.7357 | 2.14754 | 21.73573 | 2.61081 |
| 84.947 | 0.26041 | 21.75542 | 0.01274   | 21.75542 | 0.60263 | 21.75542 | 1.20314 | 21.7554 | 2.13053 | 21.75542 | 2.56211 |
| 85.047 | 0.26041 | 21.77511 | 0.01055   | 21.77511 | 0.60828 | 21.77511 | 1.20156 | 21.7751 | 2.10633 | 21.77511 | 2.53232 |
| 85.147 | 0.26093 | 21.7948  | 0.01186   | 21.7948  | 0.60323 | 21.7948  | 1.2024  | 21.7948 | 2.07631 | 21.7948  | 2.50944 |
| 85.247 | 0.26067 | 21.81449 | 0.00461   | 21.81449 | 0.6082  | 21.81449 | 1.19834 | 21.8145 | 2.04474 | 21.81449 | 2.48292 |
| 85.347 | 0.26137 | 21.83418 | 0.01071   | 21.83418 | 0.61291 | 21.83418 | 1.19604 | 21.8342 | 2.02266 | 21.83418 | 2.46555 |
| 85.447 | 0.2615  | 21.85387 | 0.00424   | 21.85387 | 0.59991 | 21.85387 | 1.20618 | 21.8539 | 1.98328 | 21.85387 | 2.45218 |
| 85.547 | 0.26142 | 21.87356 | 0.00425   | 21.87356 | 0.60212 | 21.87356 | 1.2     | 21.8736 | 1.94858 | 21.87356 | 2.439   |
| 85.647 | 0.26148 | 21.89325 | -0.00313  | 21.89325 | 0.60271 | 21.89325 | 1.2012  | 21.8933 | 1.926   | 21.89325 | 2.42793 |
| 85.747 | 0.26152 | 21.91294 | -0.0061   | 21.91294 | 0.60185 | 21.91294 | 1.19941 | 21.9129 | 1.89568 | 21.91294 | 2.42747 |
| 85.847 | 0.26205 | 21.93263 | 0.00442   | 21.93263 | 0.60431 | 21.93263 | 1.2     | 21.9326 | 1.87317 | 21.93263 | 2.42235 |
| 85.947 | 0.26204 | 21.95231 | -0.00335  | 21.95231 | 0.60634 | 21.95231 | 1.20379 | 21.9523 | 1.86103 | 21.95231 | 2.41643 |
| 86.047 | 0.26225 | 21.972   | -8.01E-04 | 21.972   | 0.61162 | 21.972   | 1.20204 | 21.972  | 1.84909 | 21.972   | 2.41609 |
| 86.147 | 0.26237 | 21.99169 | 2.54E-04  | 21.99169 | 0.61033 | 21.99169 | 1.20774 | 21.9917 | 1.83289 | 21.99169 | 2.41091 |
| 86.247 | 0.26275 | 22.01138 | 0.00766   | 22.01138 | 0.60591 | 22.01138 | 1.20951 | 22.0114 | 1.82551 | 22.01138 | 2.40669 |
| 86.347 | 0.26295 | 22.03107 | 0.00716   | 22.03107 | 0.61432 | 22.03107 | 1.20808 | 22.0311 | 1.81831 | 22.03107 | 2.41054 |
| 86.447 | 0.26302 | 22.05076 | 0.01418   | 22.05076 | 0.61315 | 22.05076 | 1.20897 | 22.0508 | 1.81143 | 22.05076 | 2.40238 |
| 86.547 | 0.26332 | 22.07045 | 0.0201    | 22.07045 | 0.61781 | 22.07045 | 1.20625 | 22.0705 | 1.81173 | 22.07045 | 2.39944 |
| 86.647 | 0.26323 | 22.09014 | 0.01927   | 22.09014 | 0.62272 | 22.09014 | 1.21473 | 22.0901 | 1.80735 | 22.09014 | 2.40625 |
| 86.747 | 0.26345 | 22.10983 | 0.02532   | 22.10983 | 0.6141  | 22.10983 | 1.21191 | 22.1098 | 1.80134 | 22.10983 | 2.40058 |
| 86.847 | 0.26383 | 22.12952 | 0.03046   | 22.12952 | 0.6237  | 22.12952 | 1.2097  | 22.1295 | 1.80289 | 22.12952 | 2.4     |
| 86.947 | 0.26403 | 22.14921 | 0.03717   | 22.14921 | 0.62311 | 22.14921 | 1.21106 | 22.1492 | 1.79889 | 22.14921 | 2.40016 |
| 87.047 | 0.26427 | 22.1689  | 0.0379    | 22.1689  | 0.62045 | 22.1689  | 1.21232 | 22.1689 | 1.80032 | 22.1689  | 2.40154 |
| 87.147 | 0.26458 | 22.18858 | 0.04123   | 22.18858 | 0.62292 | 22.18858 | 1.21554 | 22.1886 | 1.79876 | 22.18858 | 2.39855 |
| 87.247 | 0.26473 | 22.20827 | 0.048     | 22.20827 | 0.62845 | 22.20827 | 1.2123  | 22.2083 | 1.79494 | 22.20827 | 2.39908 |
| 87.347 | 0.26476 | 22.22796 | 0.04388   | 22.22796 | 0.62761 | 22.22796 | 1.21351 | 22.228  | 1.79756 | 22.22796 | 2.39961 |

|        |         |          |         |          |         |          |         |         |         |          |         |
|--------|---------|----------|---------|----------|---------|----------|---------|---------|---------|----------|---------|
| 87.447 | 0.26478 | 22.24765 | 0.03871 | 22.24765 | 0.62545 | 22.24765 | 1.21311 | 22.2477 | 1.79481 | 22.24765 | 2.40474 |
| 87.547 | 0.26501 | 22.26734 | 0.0401  | 22.26734 | 0.63249 | 22.26734 | 1.21333 | 22.2673 | 1.80106 | 22.26734 | 2.40969 |
| 87.647 | 0.26528 | 22.28703 | 0.0374  | 22.28703 | 0.62845 | 22.28703 | 1.21671 | 22.287  | 1.80099 | 22.28703 | 2.41022 |
| 87.747 | 0.26525 | 22.30672 | 0.04903 | 22.30672 | 0.63755 | 22.30672 | 1.21616 | 22.3067 | 1.8003  | 22.30672 | 2.41002 |
| 87.847 | 0.26559 | 22.32641 | 0.05081 | 22.32641 | 0.64134 | 22.32641 | 1.21153 | 22.3264 | 1.80255 | 22.32641 | 2.4077  |
| 87.947 | 0.26608 | 22.3461  | 0.05434 | 22.3461  | 0.64888 | 22.3461  | 1.21346 | 22.3461 | 1.80518 | 22.3461  | 2.40792 |
| 88.047 | 0.26621 | 22.36579 | 0.05651 | 22.36579 | 0.65048 | 22.36579 | 1.21513 | 22.3658 | 1.80349 | 22.36579 | 2.4079  |
| 88.147 | 0.26655 | 22.38548 | 0.06147 | 22.38548 | 0.65728 | 22.38548 | 1.21768 | 22.3855 | 1.81037 | 22.38548 | 2.41261 |
| 88.247 | 0.26677 | 22.40516 | 0.07318 | 22.40516 | 0.66207 | 22.40516 | 1.21419 | 22.4052 | 1.80637 | 22.40516 | 2.41974 |
| 88.347 | 0.26692 | 22.42485 | 0.07729 | 22.42485 | 0.66686 | 22.42485 | 1.22123 | 22.4249 | 1.805   | 22.42485 | 2.4133  |
| 88.447 | 0.26713 | 22.44454 | 0.0925  | 22.44454 | 0.67654 | 22.44454 | 1.22264 | 22.4445 | 1.80482 | 22.44454 | 2.41395 |
| 88.547 | 0.26768 | 22.46423 | 0.10946 | 22.46423 | 0.68771 | 22.46423 | 1.22746 | 22.4642 | 1.80239 | 22.46423 | 2.41854 |
| 88.647 | 0.2679  | 22.48392 | 0.1021  | 22.48392 | 0.68763 | 22.48392 | 1.22795 | 22.4839 | 1.8102  | 22.48392 | 2.41222 |
| 88.747 | 0.26823 | 22.50361 | 0.11821 | 22.50361 | 0.69955 | 22.50361 | 1.22518 | 22.5036 | 1.80289 | 22.50361 | 2.41735 |
| 88.847 | 0.26847 | 22.5233  | 0.11811 | 22.5233  | 0.70184 | 22.5233  | 1.22577 | 22.5233 | 1.81239 | 22.5233  | 2.41388 |
| 88.947 | 0.26864 | 22.54299 | 0.11524 | 22.54299 | 0.69544 | 22.54299 | 1.22605 | 22.543  | 1.80953 | 22.54299 | 2.41065 |
| 89.047 | 0.26898 | 22.56268 | 0.11722 | 22.56268 | 0.70299 | 22.56268 | 1.22974 | 22.5627 | 1.80466 | 22.56268 | 2.4116  |
| 89.147 | 0.26939 | 22.58237 | 0.10507 | 22.58237 | 0.69553 | 22.58237 | 1.23033 | 22.5824 | 1.80118 | 22.58237 | 2.41595 |
| 89.247 | 0.26997 | 22.60205 | 0.11231 | 22.60205 | 0.69532 | 22.60205 | 1.22839 | 22.6021 | 1.80131 | 22.60205 | 2.41423 |
| 89.347 | 0.27041 | 22.62174 | 0.09764 | 22.62174 | 0.68461 | 22.62174 | 1.22784 | 22.6217 | 1.80238 | 22.62174 | 2.40924 |
| 89.447 | 0.27075 | 22.64143 | 0.08866 | 22.64143 | 0.68815 | 22.64143 | 1.2291  | 22.6414 | 1.80408 | 22.64143 | 2.40922 |
| 89.547 | 0.27072 | 22.66112 | 0.09039 | 22.66112 | 0.67662 | 22.66112 | 1.2267  | 22.6611 | 1.80134 | 22.66112 | 2.41648 |
| 89.647 | 0.271   | 22.68081 | 0.07999 | 22.68081 | 0.68574 | 22.68081 | 1.22992 | 22.6808 | 1.80628 | 22.68081 | 2.4064  |
| 89.747 | 0.2715  | 22.7005  | 0.06888 | 22.7005  | 0.6779  | 22.7005  | 1.23072 | 22.7005 | 1.80273 | 22.7005  | 2.40462 |
| 89.847 | 0.27185 | 22.72019 | 0.06814 | 22.72019 | 0.67738 | 22.72019 | 1.22894 | 22.7202 | 1.80218 | 22.72019 | 2.4     |
| 89.947 | 0.27218 | 22.73988 | 0.05957 | 22.73988 | 0.67744 | 22.73988 | 1.23805 | 22.7399 | 1.80307 | 22.73988 | 2.40379 |
| 90.047 | 0.2722  | 22.75957 | 0.05353 | 22.75957 | 0.67248 | 22.75957 | 1.23818 | 22.7596 | 1.80052 | 22.75957 | 2.39794 |
| 90.147 | 0.27251 | 22.77926 | 0.05403 | 22.77926 | 0.67216 | 22.77926 | 1.23336 | 22.7793 | 1.80197 | 22.77926 | 2.39694 |
| 90.247 | 0.27268 | 22.79895 | 0.05292 | 22.79895 | 0.66464 | 22.79895 | 1.23679 | 22.799  | 1.80324 | 22.79895 | 2.39885 |
| 90.347 | 0.27264 | 22.81864 | 0.05219 | 22.81864 | 0.66664 | 22.81864 | 1.2425  | 22.8186 | 1.79488 | 22.81864 | 2.39421 |
| 90.447 | 0.27298 | 22.83833 | 0.04959 | 22.83833 | 0.66744 | 22.83833 | 1.23736 | 22.8383 | 1.79558 | 22.83833 | 2.39388 |
| 90.547 | 0.2733  | 22.85801 | 0.05307 | 22.85801 | 0.66605 | 22.85801 | 1.24472 | 22.858  | 1.79516 | 22.85801 | 2.39743 |
| 90.647 | 0.27344 | 22.8777  | 0.05624 | 22.8777  | 0.67762 | 22.8777  | 1.24764 | 22.8777 | 1.80504 | 22.8777  | 2.39715 |
| 90.747 | 0.27373 | 22.89739 | 0.05733 | 22.89739 | 0.66685 | 22.89739 | 1.25014 | 22.8974 | 1.80381 | 22.89739 | 2.397   |
| 90.847 | 0.27367 | 22.91708 | 0.06153 | 22.91708 | 0.6731  | 22.91708 | 1.24718 | 22.9171 | 1.80195 | 22.91708 | 2.40455 |
| 90.947 | 0.27388 | 22.93677 | 0.06873 | 22.93677 | 0.6818  | 22.93677 | 1.25103 | 22.9368 | 1.80672 | 22.93677 | 2.39858 |
| 91.047 | 0.27389 | 22.95646 | 0.06477 | 22.95646 | 0.67278 | 22.95646 | 1.25643 | 22.9565 | 1.80592 | 22.95646 | 2.40122 |
| 91.147 | 0.27396 | 22.97615 | 0.06834 | 22.97615 | 0.67917 | 22.97615 | 1.26003 | 22.9762 | 1.80732 | 22.97615 | 2.41252 |
| 91.247 | 0.27396 | 22.99584 | 0.07644 | 22.99584 | 0.6771  | 22.99584 | 1.26424 | 22.9958 | 1.81796 | 22.99584 | 2.41249 |
| 91.347 | 0.27406 | 23.01553 | 0.07975 | 23.01553 | 0.67435 | 23.01553 | 1.2637  | 23.0155 | 1.81642 | 23.01553 | 2.42174 |
| 91.447 | 0.27423 | 23.03522 | 0.07754 | 23.03522 | 0.68067 | 23.03522 | 1.27442 | 23.0352 | 1.82112 | 23.03522 | 2.43146 |
| 91.547 | 0.27447 | 23.0549  | 0.07948 | 23.0549  | 0.68055 | 23.0549  | 1.27616 | 23.0549 | 1.82714 | 23.0549  | 2.43319 |
| 91.647 | 0.27452 | 23.07459 | 0.08571 | 23.07459 | 0.67416 | 23.07459 | 1.27092 | 23.0746 | 1.83191 | 23.07459 | 2.44516 |
| 91.747 | 0.27435 | 23.09428 | 0.08447 | 23.09428 | 0.67792 | 23.09428 | 1.27059 | 23.0943 | 1.8398  | 23.09428 | 2.44592 |

|        |         |          |         |          |         |          |         |         |         |          |         |
|--------|---------|----------|---------|----------|---------|----------|---------|---------|---------|----------|---------|
| 91.847 | 0.27437 | 23.11397 | 0.08953 | 23.11397 | 0.67817 | 23.11397 | 1.27305 | 23.114  | 1.84601 | 23.11397 | 2.4528  |
| 91.947 | 0.27436 | 23.13366 | 0.0863  | 23.13366 | 0.68099 | 23.13366 | 1.26576 | 23.1337 | 1.84741 | 23.13366 | 2.46283 |
| 92.047 | 0.27446 | 23.15335 | 0.09195 | 23.15335 | 0.68363 | 23.15335 | 1.26424 | 23.1534 | 1.85574 | 23.15335 | 2.4642  |
| 92.147 | 0.27443 | 23.17304 | 0.08865 | 23.17304 | 0.68984 | 23.17304 | 1.26299 | 23.173  | 1.86426 | 23.17304 | 2.47151 |
| 92.247 | 0.27459 | 23.19273 | 0.09204 | 23.19273 | 0.68735 | 23.19273 | 1.26111 | 23.1927 | 1.8536  | 23.19273 | 2.47293 |
| 92.347 | 0.27478 | 23.21242 | 0.08537 | 23.21242 | 0.69405 | 23.21242 | 1.26213 | 23.2124 | 1.86949 | 23.21242 | 2.48854 |
| 92.447 | 0.27444 | 23.23211 | 0.09964 | 23.23211 | 0.69068 | 23.23211 | 1.25783 | 23.2321 | 1.86139 | 23.23211 | 2.48779 |
| 92.547 | 0.2744  | 23.25179 | 0.09712 | 23.25179 | 0.69526 | 23.25179 | 1.25663 | 23.2518 | 1.86629 | 23.25179 | 2.49521 |
| 92.647 | 0.2742  | 23.27148 | 0.10109 | 23.27148 | 0.70284 | 23.27148 | 1.26147 | 23.2715 | 1.87056 | 23.27148 | 2.49488 |
| 92.747 | 0.27427 | 23.29117 | 0.10629 | 23.29117 | 0.70692 | 23.29117 | 1.26088 | 23.2912 | 1.86302 | 23.29117 | 2.48285 |
| 92.847 | 0.27436 | 23.31086 | 0.11376 | 23.31086 | 0.71213 | 23.31086 | 1.25978 | 23.3109 | 1.86017 | 23.31086 | 2.46731 |
| 92.947 | 0.2744  | 23.33055 | 0.12266 | 23.33055 | 0.71853 | 23.33055 | 1.25952 | 23.3306 | 1.85795 | 23.33055 | 2.46723 |
| 93.047 | 0.27466 | 23.35024 | 0.12444 | 23.35024 | 0.71298 | 23.35024 | 1.25971 | 23.3502 | 1.85517 | 23.35024 | 2.4589  |
| 93.147 | 0.27445 | 23.36993 | 0.13114 | 23.36993 | 0.71707 | 23.36993 | 1.26399 | 23.3699 | 1.84376 | 23.36993 | 2.44354 |
| 93.247 | 0.27454 | 23.38962 | 0.13583 | 23.38962 | 0.72003 | 23.38962 | 1.26011 | 23.3896 | 1.83872 | 23.38962 | 2.42903 |
| 93.347 | 0.27481 | 23.40931 | 0.13514 | 23.40931 | 0.71592 | 23.40931 | 1.26268 | 23.4093 | 1.83706 | 23.40931 | 2.42088 |
| 93.447 | 0.27485 | 23.429   | 0.1362  | 23.429   | 0.71482 | 23.429   | 1.25616 | 23.429  | 1.83421 | 23.429   | 2.41855 |
| 93.547 | 0.27499 | 23.44869 | 0.14349 | 23.44869 | 0.71277 | 23.44869 | 1.25078 | 23.4487 | 1.82693 | 23.44869 | 2.41368 |
| 93.647 | 0.27498 | 23.46838 | 0.14941 | 23.46838 | 0.69846 | 23.46838 | 1.25103 | 23.4684 | 1.82208 | 23.46838 | 2.40571 |
| 93.747 | 0.27491 | 23.48807 | 0.14321 | 23.48807 | 0.69129 | 23.48807 | 1.24596 | 23.4881 | 1.82473 | 23.48807 | 2.40938 |
| 93.847 | 0.27531 | 23.50775 | 0.13882 | 23.50775 | 0.67447 | 23.50775 | 1.25117 | 23.5078 | 1.82507 | 23.50775 | 2.40512 |
| 93.947 | 0.27561 | 23.52744 | 0.14041 | 23.52744 | 0.6735  | 23.52744 | 1.24677 | 23.5274 | 1.81479 | 23.52744 | 2.40212 |
| 94.047 | 0.27544 | 23.54713 | 0.13305 | 23.54713 | 0.67347 | 23.54713 | 1.23603 | 23.5471 | 1.81451 | 23.54713 | 2.40671 |
| 94.147 | 0.2752  | 23.56682 | 0.13075 | 23.56682 | 0.6618  | 23.56682 | 1.24909 | 23.5668 | 1.81167 | 23.56682 | 2.40274 |
| 94.247 | 0.2754  | 23.58651 | 0.12301 | 23.58651 | 0.6607  | 23.58651 | 1.24506 | 23.5865 | 1.80826 | 23.58651 | 2.40454 |
| 94.347 | 0.27534 | 23.6062  | 0.10819 | 23.6062  | 0.64447 | 23.6062  | 1.24732 | 23.6062 | 1.80935 | 23.6062  | 2.40567 |
| 94.447 | 0.27537 | 23.62589 | 0.09221 | 23.62589 | 0.65132 | 23.62589 | 1.24959 | 23.6259 | 1.80988 | 23.62589 | 2.40455 |
| 94.547 | 0.27543 | 23.64558 | 0.08356 | 23.64558 | 0.6588  | 23.64558 | 1.23812 | 23.6456 | 1.81116 | 23.64558 | 2.40611 |
| 94.647 | 0.27556 | 23.66527 | 0.07108 | 23.66527 | 0.65351 | 23.66527 | 1.24148 | 23.6653 | 1.80963 | 23.66527 | 2.40257 |
| 94.747 | 0.27567 | 23.68496 | 0.06515 | 23.68496 | 0.6491  | 23.68496 | 1.23879 | 23.685  | 1.80935 | 23.68496 | 2.40842 |
| 94.847 | 0.27582 | 23.70465 | 0.05746 | 23.70465 | 0.64737 | 23.70465 | 1.23889 | 23.7047 | 1.81006 | 23.70465 | 2.41567 |
| 94.947 | 0.27631 | 23.72433 | 0.04979 | 23.72433 | 0.64548 | 23.72433 | 1.2407  | 23.7243 | 1.81072 | 23.72433 | 2.40705 |
| 95.047 | 0.27639 | 23.74402 | 0.04102 | 23.74402 | 0.64527 | 23.74402 | 1.24359 | 23.744  | 1.81481 | 23.74402 | 2.41539 |
| 95.147 | 0.27678 | 23.76371 | 0.04477 | 23.76371 | 0.64387 | 23.76371 | 1.24307 | 23.7637 | 1.81528 | 23.76371 | 2.41949 |
| 95.247 | 0.27662 | 23.7834  | 0.04708 | 23.7834  | 0.6416  | 23.7834  | 1.23765 | 23.7834 | 1.8155  | 23.7834  | 2.42262 |
| 95.347 | 0.27686 | 23.80309 | 0.04032 | 23.80309 | 0.64508 | 23.80309 | 1.2421  | 23.8031 | 1.81297 | 23.80309 | 2.42563 |
| 95.447 | 0.27662 | 23.82278 | 0.03842 | 23.82278 | 0.64437 | 23.82278 | 1.24174 | 23.8228 | 1.81494 | 23.82278 | 2.43616 |
| 95.547 | 0.27684 | 23.84247 | 0.03912 | 23.84247 | 0.64373 | 23.84247 | 1.2438  | 23.8425 | 1.82141 | 23.84247 | 2.43365 |
| 95.647 | 0.27719 | 23.86216 | 0.03677 | 23.86216 | 0.64508 | 23.86216 | 1.24029 | 23.8622 | 1.81551 | 23.86216 | 2.44242 |
| 95.747 | 0.27738 | 23.88185 | 0.03837 | 23.88185 | 0.6465  | 23.88185 | 1.24123 | 23.8819 | 1.82141 | 23.88185 | 2.44337 |
| 95.847 | 0.27738 | 23.90154 | 0.03304 | 23.90154 | 0.64742 | 23.90154 | 1.24753 | 23.9015 | 1.83351 | 23.90154 | 2.45038 |
| 95.947 | 0.27744 | 23.92122 | 0.03855 | 23.92122 | 0.64684 | 23.92122 | 1.24924 | 23.9212 | 1.8376  | 23.92122 | 2.45115 |
| 96.047 | 0.27747 | 23.94091 | 0.04172 | 23.94091 | 0.64708 | 23.94091 | 1.25363 | 23.9409 | 1.83464 | 23.94091 | 2.45629 |
| 96.147 | 0.27765 | 23.9606  | 0.04528 | 23.9606  | 0.6492  | 23.9606  | 1.25152 | 23.9606 | 1.83811 | 23.9606  | 2.45815 |



|         |         |          |         |          |         |          |         |         |         |          |         |
|---------|---------|----------|---------|----------|---------|----------|---------|---------|---------|----------|---------|
| 96.247  | 0.27765 | 23.98029 | 0.0491  | 23.98029 | 0.65257 | 23.98029 | 1.2505  | 23.9803 | 1.84708 | 23.98029 | 2.46334 |
| 96.347  | 0.278   | 23.99998 | 0.05532 | 23.99998 | 0.65406 | 23.99998 | 1.24503 | 24      | 1.8473  | 23.99998 | 2.46824 |
| 96.447  | 0.2781  | 24.01967 | 0.04714 | 24.01967 | 0.65643 | 24.01967 | 1.24612 | 24.0197 | 1.8479  | 24.01967 | 2.46992 |
| 96.547  | 0.27835 | 24.03936 | 0.05058 | 24.03936 | 0.65473 | 24.03936 | 1.23978 | 24.0394 | 1.85824 | 24.03936 | 2.46529 |
| 96.647  | 0.27849 | 24.05905 | 0.04772 | 24.05905 | 0.65209 | 24.05905 | 1.23209 | 24.0591 | 1.85815 | 24.05905 | 2.47746 |
| 96.747  | 0.2785  | 24.07874 | 0.05517 | 24.07874 | 0.65064 | 24.07874 | 1.23122 | 24.0787 | 1.8615  | 24.07874 | 2.47599 |
| 96.847  | 0.27861 | 24.09843 | 0.05296 | 24.09843 | 0.64475 | 24.09843 | 1.22741 | 24.0984 | 1.86997 | 24.09843 | 2.47694 |
| 96.947  | 0.27931 | 24.11812 | 0.04921 | 24.11812 | 0.63824 | 24.11812 | 1.22763 | 24.1181 | 1.86201 | 24.11812 | 2.47487 |
| 97.047  | 0.27938 | 24.13781 | 0.04454 | 24.13781 | 0.63993 | 24.13781 | 1.22227 | 24.1378 | 1.86854 | 24.13781 | 2.47213 |
| 97.147  | 0.27972 | 24.15749 | 0.04053 | 24.15749 | 0.63887 | 24.15749 | 1.22069 | 24.1575 | 1.86377 | 24.15749 | 2.46448 |
| 97.247  | 0.27969 | 24.17718 | 0.0336  | 24.17718 | 0.63342 | 24.17718 | 1.22349 | 24.1772 | 1.86355 | 24.17718 | 2.4615  |
| 97.347  | 0.27982 | 24.19687 | 0.02971 | 24.19687 | 0.62573 | 24.19687 | 1.22603 | 24.1969 | 1.85803 | 24.19687 | 2.45524 |
| 97.447  | 0.27989 | 24.21656 | 0.02914 | 24.21656 | 0.62592 | 24.21656 | 1.22501 | 24.2166 | 1.85906 | 24.21656 | 2.45032 |
| 97.547  | 0.28033 | 24.23625 | 0.0213  | 24.23625 | 0.62642 | 24.23625 | 1.22285 | 24.2363 | 1.85604 | 24.23625 | 2.44776 |
| 97.647  | 0.28028 | 24.25594 | 0.0169  | 24.25594 | 0.62692 | 24.25594 | 1.22442 | 24.2559 | 1.8527  | 24.25594 | 2.44357 |
| 97.747  | 0.28103 | 24.27563 | 0.01878 | 24.27563 | 0.62373 | 24.27563 | 1.22789 | 24.2756 | 1.85399 | 24.27563 | 2.42986 |
| 97.847  | 0.28124 | 24.29532 | 0.02313 | 24.29532 | 0.6196  | 24.29532 | 1.22945 | 24.2953 | 1.85134 | 24.29532 | 2.42863 |
| 97.947  | 0.2818  | 24.31501 | 0.01466 | 24.31501 | 0.6228  | 24.31501 | 1.22988 | 24.315  | 1.84856 | 24.31501 | 2.42796 |
| 98.047  | 0.28181 | 24.3347  | 0.01805 | 24.3347  | 0.61774 | 24.3347  | 1.23083 | 24.3347 | 1.84929 | 24.3347  | 2.42862 |
| 98.147  | 0.28215 | 24.35439 | 0.01794 | 24.35439 | 0.6175  | 24.35439 | 1.23173 | 24.3544 | 1.84164 | 24.35439 | 2.42776 |
| 98.247  | 0.2823  | 24.37407 | 0.01899 | 24.37407 | 0.61989 | 24.37407 | 1.22989 | 24.3741 | 1.84224 | 24.37407 | 2.43157 |
| 98.347  | 0.28239 | 24.39376 | 0.0205  | 24.39376 | 0.6137  | 24.39376 | 1.2346  | 24.3938 | 1.8414  | 24.39376 | 2.43314 |
| 98.447  | 0.28263 | 24.41345 | 0.0178  | 24.41345 | 0.61715 | 24.41345 | 1.22967 | 24.4135 | 1.83825 | 24.41345 | 2.43719 |
| 98.547  | 0.28279 | 24.43314 | 0.02047 | 24.43314 | 0.62129 | 24.43314 | 1.23304 | 24.4331 | 1.83848 | 24.43314 | 2.43173 |
| 98.647  | 0.28295 | 24.45283 | 0.01692 | 24.45283 | 0.6126  | 24.45283 | 1.23352 | 24.4528 | 1.83508 | 24.45283 | 2.43245 |
| 98.747  | 0.28342 | 24.47252 | 0.01    | 24.47252 | 0.61493 | 24.47252 | 1.22977 | 24.4725 | 1.84361 | 24.47252 | 2.44286 |
| 98.847  | 0.28406 | 24.49221 | 0.01456 | 24.49221 | 0.60912 | 24.49221 | 1.23036 | 24.4922 | 1.83934 | 24.49221 | 2.43413 |
| 98.947  | 0.28432 | 24.5119  | 0.01089 | 24.5119  | 0.60488 | 24.5119  | 1.23064 | 24.5119 | 1.84125 | 24.5119  | 2.44291 |
| 99.047  | 0.28419 | 24.53159 | 0.01715 | 24.53159 | 0.6096  | 24.53159 | 1.23092 | 24.5316 | 1.84448 | 24.53159 | 2.43145 |
| 99.147  | 0.28487 | 24.55128 | 0.00952 | 24.55128 | 0.61437 | 24.55128 | 1.23229 | 24.5513 | 1.84076 | 24.55128 | 2.43388 |
| 99.247  | 0.28475 | 24.57096 | 0.01221 | 24.57096 | 0.61245 | 24.57096 | 1.22891 | 24.571  | 1.84136 | 24.57096 | 2.43587 |
| 99.347  | 0.28475 | 24.59065 | 0.01321 | 24.59065 | 0.60659 | 24.59065 | 1.2358  | 24.5907 | 1.84596 | 24.59065 | 2.42878 |
| 99.447  | 0.28482 | 24.61034 | 0.01687 | 24.61034 | 0.6123  | 24.61034 | 1.22813 | 24.6103 | 1.84419 | 24.61034 | 2.43187 |
| 99.547  | 0.2852  | 24.63003 | 0.01113 | 24.63003 | 0.6112  | 24.63003 | 1.22836 | 24.63   | 1.83929 | 24.63003 | 2.43004 |
| 99.647  | 0.28566 | 24.64972 | 0.01161 | 24.64972 | 0.60984 | 24.64972 | 1.22312 | 24.6497 | 1.83814 | 24.64972 | 2.42259 |
| 99.747  | 0.28573 | 24.66941 | 0.0204  | 24.66941 | 0.61086 | 24.66941 | 1.22717 | 24.6694 | 1.83081 | 24.66941 | 2.42095 |
| 99.847  | 0.28593 | 24.6891  | 0.01796 | 24.6891  | 0.61119 | 24.6891  | 1.22414 | 24.6891 | 1.82672 | 24.6891  | 2.41731 |
| 99.947  | 0.28642 | 24.70879 | 0.0121  | 24.70879 | 0.61003 | 24.70879 | 1.21896 | 24.7088 | 1.82851 | 24.70879 | 2.42549 |
| 100.047 | 0.28658 | 24.72848 | 0.0124  | 24.72848 | 0.60799 | 24.72848 | 1.21992 | 24.7285 | 1.8233  | 24.72848 | 2.4164  |
| 100.147 | 0.28689 | 24.74817 | 0.01581 | 24.74817 | 0.60978 | 24.74817 | 1.21695 | 24.7482 | 1.82184 | 24.74817 | 2.40877 |
| 100.247 | 0.28729 | 24.76786 | 0.01546 | 24.76786 | 0.60943 | 24.76786 | 1.21502 | 24.7679 | 1.82188 | 24.76786 | 2.41592 |
| 100.347 | 0.28715 | 24.78755 | 0.01037 | 24.78755 | 0.61083 | 24.78755 | 1.21458 | 24.7876 | 1.81461 | 24.78755 | 2.41804 |
| 100.447 | 0.28744 | 24.80723 | 0.01112 | 24.80723 | 0.61224 | 24.80723 | 1.21218 | 24.8072 | 1.81552 | 24.80723 | 2.40695 |
| 100.547 | 0.28752 | 24.82692 | 0.01136 | 24.82692 | 0.60876 | 24.82692 | 1.21686 | 24.8269 | 1.80975 | 24.82692 | 2.41283 |

|         |         |          |         |          |         |          |         |         |         |          |         |
|---------|---------|----------|---------|----------|---------|----------|---------|---------|---------|----------|---------|
| 100.647 | 0.28798 | 24.84661 | 0.01924 | 24.84661 | 0.61311 | 24.84661 | 1.20961 | 24.8466 | 1.80885 | 24.84661 | 2.40853 |
| 100.747 | 0.2883  | 24.8663  | 0.02038 | 24.8663  | 0.61564 | 24.8663  | 1.2086  | 24.8663 | 1.8052  | 24.8663  | 2.40811 |
| 100.847 | 0.28831 | 24.88599 | 0.02321 | 24.88599 | 0.60991 | 24.88599 | 1.20347 | 24.886  | 1.80286 | 24.88599 | 2.40254 |
| 100.947 | 0.28832 | 24.90568 | 0.01988 | 24.90568 | 0.62021 | 24.90568 | 1.21083 | 24.9057 | 1.79853 | 24.90568 | 2.39776 |
| 101.047 | 0.28871 | 24.92537 | 0.03199 | 24.92537 | 0.61837 | 24.92537 | 1.20736 | 24.9254 | 1.79419 | 24.92537 | 2.39783 |
| 101.147 | 0.28856 | 24.94506 | 0.03295 | 24.94506 | 0.62667 | 24.94506 | 1.2076  | 24.9451 | 1.79217 | 24.94506 | 2.39899 |
| 101.247 | 0.28888 | 24.96475 | 0.04305 | 24.96475 | 0.6237  | 24.96475 | 1.20531 | 24.9648 | 1.79464 | 24.96475 | 2.40105 |
| 101.347 | 0.28923 | 24.98444 | 0.05152 | 24.98444 | 0.63199 | 24.98444 | 1.20761 | 24.9844 | 1.79587 | 24.98444 | 2.39197 |
| 101.447 | 0.28932 | 25.00413 | 0.05708 | 25.00413 | 0.64386 | 25.00413 | 1.21513 | 25.0041 | 1.79541 | 25.00413 | 2.39428 |
| 101.547 | 0.28946 | 25.02382 | 0.0653  | 25.02382 | 0.63832 | 25.02382 | 1.20644 | 25.0238 | 1.80088 | 25.02382 | 2.39992 |
| 101.647 | 0.28985 | 25.0435  | 0.06917 | 25.0435  | 0.64756 | 25.0435  | 1.20172 | 25.0435 | 1.79611 | 25.0435  | 2.40145 |
| 101.747 | 0.29022 | 25.06319 | 0.07707 | 25.06319 | 0.65135 | 25.06319 | 1.20465 | 25.0632 | 1.79403 | 25.06319 | 2.39891 |
| 101.847 | 0.29054 | 25.08288 | 0.08781 | 25.08288 | 0.65208 | 25.08288 | 1.21057 | 25.0829 | 1.8     | 25.08288 | 2.41025 |
| 101.947 | 0.29061 | 25.10257 | 0.09001 | 25.10257 | 0.65781 | 25.10257 | 1.20771 | 25.1026 | 1.80208 | 25.10257 | 2.40681 |
| 102.047 | 0.2907  | 25.12226 | 0.10083 | 25.12226 | 0.66149 | 25.12226 | 1.20878 | 25.1223 | 1.80277 | 25.12226 | 2.40809 |
| 102.147 | 0.29104 | 25.14195 | 0.11528 | 25.14195 | 0.66629 | 25.14195 | 1.21228 | 25.142  | 1.80441 | 25.14195 | 2.41199 |
| 102.247 | 0.29138 | 25.16164 | 0.11864 | 25.16164 | 0.67321 | 25.16164 | 1.2087  | 25.1616 | 1.8068  | 25.16164 | 2.40806 |
| 102.347 | 0.29158 | 25.18133 | 0.10904 | 25.18133 | 0.66925 | 25.18133 | 1.20951 | 25.1813 | 1.80462 | 25.18133 | 2.4105  |
| 102.447 | 0.29171 | 25.20102 | 0.117   | 25.20102 | 0.67512 | 25.20102 | 1.21234 | 25.201  | 1.80864 | 25.20102 | 2.41966 |
| 102.547 | 0.29215 | 25.22071 | 0.12776 | 25.22071 | 0.66809 | 25.22071 | 1.20882 | 25.2207 | 1.8134  | 25.22071 | 2.42356 |
| 102.647 | 0.29242 | 25.24039 | 0.1175  | 25.24039 | 0.66819 | 25.24039 | 1.20916 | 25.2404 | 1.81147 | 25.24039 | 2.43024 |
| 102.747 | 0.29284 | 25.26008 | 0.11548 | 25.26008 | 0.6718  | 25.26008 | 1.21323 | 25.2601 | 1.81892 | 25.26008 | 2.42873 |
| 102.847 | 0.29294 | 25.27977 | 0.10944 | 25.27977 | 0.66772 | 25.27977 | 1.21058 | 25.2798 | 1.81637 | 25.27977 | 2.42705 |
| 102.947 | 0.29395 | 25.29946 | 0.09945 | 25.29946 | 0.65951 | 25.29946 | 1.20659 | 25.2995 | 1.82076 | 25.29946 | 2.43919 |
| 103.047 | 0.29424 | 25.31915 | 0.09899 | 25.31915 | 0.664   | 25.31915 | 1.2087  | 25.3192 | 1.8204  | 25.31915 | 2.43576 |
| 103.147 | 0.29442 | 25.33884 | 0.09523 | 25.33884 | 0.66055 | 25.33884 | 1.20848 | 25.3388 | 1.8256  | 25.33884 | 2.43899 |
| 103.247 | 0.29459 | 25.35853 | 0.10067 | 25.35853 | 0.65897 | 25.35853 | 1.20997 | 25.3585 | 1.83367 | 25.35853 | 2.43961 |
| 103.347 | 0.29471 | 25.37822 | 0.10113 | 25.37822 | 0.66478 | 25.37822 | 1.21125 | 25.3782 | 1.83693 | 25.37822 | 2.44188 |
| 103.447 | 0.29547 | 25.39791 | 0.09321 | 25.39791 | 0.66345 | 25.39791 | 1.21831 | 25.3979 | 1.83238 | 25.39791 | 2.44159 |
| 103.547 | 0.29593 | 25.4176  | 0.09431 | 25.4176  | 0.66369 | 25.4176  | 1.21474 | 25.4176 | 1.84127 | 25.4176  | 2.44355 |
| 103.647 | 0.29632 | 25.43729 | 0.09217 | 25.43729 | 0.67425 | 25.43729 | 1.21762 | 25.4373 | 1.83997 | 25.43729 | 2.45005 |
| 103.747 | 0.29688 | 25.45697 | 0.09372 | 25.45697 | 0.66854 | 25.45697 | 1.21906 | 25.457  | 1.84436 | 25.45697 | 2.4388  |
| 103.847 | 0.29731 | 25.47666 | 0.08749 | 25.47666 | 0.66258 | 25.47666 | 1.21884 | 25.4767 | 1.84993 | 25.47666 | 2.4447  |
| 103.947 | 0.29802 | 25.49635 | 0.07965 | 25.49635 | 0.66214 | 25.49635 | 1.22038 | 25.4964 | 1.84695 | 25.49635 | 2.44667 |
| 104.047 | 0.29842 | 25.51604 | 0.0674  | 25.51604 | 0.66801 | 25.51604 | 1.22383 | 25.516  | 1.84309 | 25.51604 | 2.45263 |
| 104.147 | 0.29911 | 25.53573 | 0.06344 | 25.53573 | 0.66256 | 25.53573 | 1.2231  | 25.5357 | 1.85023 | 25.53573 | 2.45017 |
| 104.247 | 0.29965 | 25.55542 | 0.05203 | 25.55542 | 0.66149 | 25.55542 | 1.22279 | 25.5554 | 1.85012 | 25.55542 | 2.45129 |
| 104.347 | 0.3     | 25.57511 | 0.03673 | 25.57511 | 0.65009 | 25.57511 | 1.22598 | 25.5751 | 1.85001 | 25.57511 | 2.44556 |
| 104.447 | 0.30064 | 25.5948  | 0.03453 | 25.5948  | 0.65121 | 25.5948  | 1.23212 | 25.5948 | 1.85127 | 25.5948  | 2.44692 |
| 104.547 | 0.30123 | 25.61449 | 0.02649 | 25.61449 | 0.63944 | 25.61449 | 1.23567 | 25.6145 | 1.85622 | 25.61449 | 2.44894 |
| 104.647 | 0.30208 | 25.63418 | 0.0182  | 25.63418 | 0.63512 | 25.63418 | 1.23944 | 25.6342 | 1.85499 | 25.63418 | 2.44727 |
| 104.747 | 0.30222 | 25.65387 | 0.01969 | 25.65387 | 0.63473 | 25.65387 | 1.23457 | 25.6539 | 1.858   | 25.65387 | 2.44596 |
| 104.847 | 0.30266 | 25.67356 | 0.00575 | 25.67356 | 0.62521 | 25.67356 | 1.23715 | 25.6736 | 1.85708 | 25.67356 | 2.45168 |
| 104.947 | 0.30348 | 25.69324 | 0.00537 | 25.69324 | 0.62415 | 25.69324 | 1.23874 | 25.6932 | 1.85941 | 25.69324 | 2.45547 |

|         |         |          |           |          |         |          |         |         |         |          |         |
|---------|---------|----------|-----------|----------|---------|----------|---------|---------|---------|----------|---------|
| 105.047 | 0.30376 | 25.71293 | 0.00505   | 25.71293 | 0.62321 | 25.71293 | 1.24318 | 25.7129 | 1.85867 | 25.71293 | 2.45811 |
| 105.147 | 0.30439 | 25.73262 | 0.00357   | 25.73262 | 0.62721 | 25.73262 | 1.24571 | 25.7326 | 1.85881 | 25.73262 | 2.46002 |
| 105.247 | 0.30488 | 25.75231 | 0.00358   | 25.75231 | 0.62395 | 25.75231 | 1.2472  | 25.7523 | 1.86126 | 25.75231 | 2.4666  |
| 105.347 | 0.30488 | 25.772   | 0.00157   | 25.772   | 0.62282 | 25.772   | 1.25184 | 25.772  | 1.86384 | 25.772   | 2.47342 |
| 105.447 | 0.30511 | 25.79169 | 0.00534   | 25.79169 | 0.62601 | 25.79169 | 1.25483 | 25.7917 | 1.86586 | 25.79169 | 2.48024 |
| 105.547 | 0.30569 | 25.81138 | 0.00716   | 25.81138 | 0.62888 | 25.81138 | 1.2557  | 25.8114 | 1.86206 | 25.81138 | 2.47712 |
| 105.647 | 0.30585 | 25.83107 | 0.01255   | 25.83107 | 0.62957 | 25.83107 | 1.25229 | 25.8311 | 1.8612  | 25.83107 | 2.48776 |
| 105.747 | 0.30679 | 25.85076 | 0.01302   | 25.85076 | 0.63232 | 25.85076 | 1.25807 | 25.8508 | 1.8596  | 25.85076 | 2.497   |
| 105.847 | 0.30684 | 25.87045 | 0.02243   | 25.87045 | 0.63251 | 25.87045 | 1.25455 | 25.8705 | 1.86186 | 25.87045 | 2.49643 |
| 105.947 | 0.30708 | 25.89013 | 0.01881   | 25.89013 | 0.63301 | 25.89013 | 1.25408 | 25.8901 | 1.86732 | 25.89013 | 2.49519 |
| 106.047 | 0.30727 | 25.90982 | 0.01616   | 25.90982 | 0.63964 | 25.90982 | 1.25    | 25.9098 | 1.86452 | 25.90982 | 2.49342 |
| 106.147 | 0.30733 | 25.92951 | 0.02661   | 25.92951 | 0.63438 | 25.92951 | 1.23735 | 25.9295 | 1.87279 | 25.92951 | 2.49509 |
| 106.247 | 0.30779 | 25.9492  | 0.02844   | 25.9492  | 0.63294 | 25.9492  | 1.23853 | 25.9492 | 1.87143 | 25.9492  | 2.50004 |
| 106.347 | 0.30821 | 25.96889 | 0.03091   | 25.96889 | 0.62825 | 25.96889 | 1.2377  | 25.9689 | 1.87126 | 25.96889 | 2.49765 |
| 106.447 | 0.30809 | 25.98858 | 0.03267   | 25.98858 | 0.62525 | 25.98858 | 1.23088 | 25.9886 | 1.87665 | 25.98858 | 2.50466 |
| 106.547 | 0.30779 | 26.00827 | 0.03469   | 26.00827 | 0.6198  | 26.00827 | 1.23305 | 26.0083 | 1.87255 | 26.00827 | 2.49979 |
| 106.647 | 0.30837 | 26.02796 | 0.03717   | 26.02796 | 0.6183  | 26.02796 | 1.23227 | 26.028  | 1.88525 | 26.02796 | 2.4997  |
| 106.747 | 0.30851 | 26.04765 | 0.03757   | 26.04765 | 0.61686 | 26.04765 | 1.22576 | 26.0477 | 1.88877 | 26.04765 | 2.49853 |
| 106.847 | 0.30902 | 26.06734 | 0.03803   | 26.06734 | 0.61561 | 26.06734 | 1.22437 | 26.0673 | 1.89366 | 26.06734 | 2.4996  |
| 106.947 | 0.30924 | 26.08703 | 0.03163   | 26.08703 | 0.60203 | 26.08703 | 1.22318 | 26.087  | 1.88806 | 26.08703 | 2.49643 |
| 107.047 | 0.30903 | 26.10671 | 0.03702   | 26.10671 | 0.60961 | 26.10671 | 1.2224  | 26.1067 | 1.89001 | 26.10671 | 2.50084 |
| 107.147 | 0.30889 | 26.1264  | 0.02647   | 26.1264  | 0.60367 | 26.1264  | 1.2177  | 26.1264 | 1.89522 | 26.1264  | 2.48385 |
| 107.247 | 0.30929 | 26.14609 | 0.01993   | 26.14609 | 0.6021  | 26.14609 | 1.21909 | 26.1461 | 1.89799 | 26.14609 | 2.4882  |
| 107.347 | 0.30907 | 26.16578 | 0.01618   | 26.16578 | 0.60035 | 26.16578 | 1.21889 | 26.1658 | 1.89682 | 26.16578 | 2.48406 |
| 107.447 | 0.30916 | 26.18547 | 0.01217   | 26.18547 | 0.60668 | 26.18547 | 1.21955 | 26.1855 | 1.89072 | 26.18547 | 2.47156 |
| 107.547 | 0.3094  | 26.20516 | 0.00369   | 26.20516 | 0.60443 | 26.20516 | 1.21392 | 26.2052 | 1.89449 | 26.20516 | 2.47112 |
| 107.647 | 0.30956 | 26.22485 | 0.00474   | 26.22485 | 0.6085  | 26.22485 | 1.21537 | 26.2249 | 1.89694 | 26.22485 | 2.46995 |
| 107.747 | 0.30957 | 26.24454 | -0.00192  | 26.24454 | 0.60237 | 26.24454 | 1.21361 | 26.2445 | 1.90128 | 26.24454 | 2.45127 |
| 107.847 | 0.30961 | 26.26423 | 4.25E-04  | 26.26423 | 0.60381 | 26.26423 | 1.20979 | 26.2642 | 1.89573 | 26.26423 | 2.45107 |
| 107.947 | 0.30943 | 26.28392 | -0.00235  | 26.28392 | 0.60331 | 26.28392 | 1.21201 | 26.2839 | 1.89388 | 26.28392 | 2.45197 |
| 108.047 | 0.30976 | 26.30361 | -7.78E-04 | 26.30361 | 0.59712 | 26.30361 | 1.21206 | 26.3036 | 1.89234 | 26.30361 | 2.44511 |
| 108.147 | 0.30942 | 26.3233  | -0.00141  | 26.3233  | 0.60276 | 26.3233  | 1.20927 | 26.3233 | 1.88611 | 26.3233  | 2.43771 |
| 108.247 | 0.30947 | 26.34299 | -0.00438  | 26.34299 | 0.60201 | 26.34299 | 1.21051 | 26.343  | 1.88601 | 26.34299 | 2.43915 |
| 108.347 | 0.30968 | 26.36267 | 4.32E-04  | 26.36267 | 0.6032  | 26.36267 | 1.20767 | 26.3627 | 1.87685 | 26.36267 | 2.44217 |
| 108.447 | 0.30967 | 26.38236 | 0.00272   | 26.38236 | 0.60683 | 26.38236 | 1.2103  | 26.3824 | 1.87443 | 26.38236 | 2.43804 |
| 108.547 | 0.30952 | 26.40205 | 0.00267   | 26.40205 | 0.60427 | 26.40205 | 1.20901 | 26.4021 | 1.86714 | 26.40205 | 2.437   |
| 108.647 | 0.30963 | 26.42174 | 0.00262   | 26.42174 | 0.60183 | 26.42174 | 1.20607 | 26.4217 | 1.86817 | 26.42174 | 2.4402  |
| 108.747 | 0.30977 | 26.44143 | 0.00496   | 26.44143 | 0.6111  | 26.44143 | 1.20447 | 26.4414 | 1.85857 | 26.44143 | 2.44055 |
| 108.847 | 0.3099  | 26.46112 | 4.40E-04  | 26.46112 | 0.60591 | 26.46112 | 1.2039  | 26.4611 | 1.8569  | 26.46112 | 2.44176 |
| 108.947 | 0.30987 | 26.48081 | 0.00175   | 26.48081 | 0.60091 | 26.48081 | 1.20695 | 26.4808 | 1.85649 | 26.48081 | 2.43745 |
| 109.047 | 0.31006 | 26.5005  | 0.0076    | 26.5005  | 0.60279 | 26.5005  | 1.2086  | 26.5005 | 1.85739 | 26.5005  | 2.44078 |
| 109.147 | 0.30998 | 26.52019 | 2.88E-05  | 26.52019 | 0.60561 | 26.52019 | 1.20638 | 26.5202 | 1.85197 | 26.52019 | 2.44738 |
| 109.247 | 0.31015 | 26.53988 | 0.00153   | 26.53988 | 0.60298 | 26.53988 | 1.20876 | 26.5399 | 1.85094 | 26.53988 | 2.44743 |
| 109.347 | 0.31036 | 26.55956 | 0.00129   | 26.55956 | 0.60749 | 26.55956 | 1.2037  | 26.5596 | 1.85746 | 26.55956 | 2.44634 |

|         |         |          |          |          |         |          |         |         |         |          |         |
|---------|---------|----------|----------|----------|---------|----------|---------|---------|---------|----------|---------|
| 109.447 | 0.3106  | 26.57925 | -0.002   | 26.57925 | 0.59967 | 26.57925 | 1.20917 | 26.5793 | 1.86355 | 26.57925 | 2.45264 |
| 109.547 | 0.31106 | 26.59894 | 0.00573  | 26.59894 | 0.60337 | 26.59894 | 1.20726 | 26.5989 | 1.8577  | 26.59894 | 2.44784 |
| 109.647 | 0.31112 | 26.61863 | 0.006    | 26.61863 | 0.60012 | 26.61863 | 1.20349 | 26.6186 | 1.85566 | 26.61863 | 2.45178 |
| 109.747 | 0.3112  | 26.63832 | 1.80E-04 | 26.63832 | 0.60244 | 26.63832 | 1.20886 | 26.6383 | 1.86193 | 26.63832 | 2.45856 |
| 109.847 | 0.31132 | 26.65801 | 0        | 26.65801 | 0.6     | 26.65801 | 1.20003 | 26.658  | 1.86396 | 26.65801 | 2.46189 |
| 109.947 | 0.3115  | 26.6777  | 0.00335  | 26.6777  | 0.60142 | 26.6777  | 1.2084  | 26.6777 | 1.85955 | 26.6777  | 2.45389 |
| 110.047 | 0.31177 | 26.69739 | 0.00909  | 26.69739 | 0.59596 | 26.69739 | 1.20411 | 26.6974 | 1.8572  | 26.69739 | 2.46019 |
| 110.147 | 0.31224 | 26.71708 | 0.0068   | 26.71708 | 0.60082 | 26.71708 | 1.20664 | 26.7171 | 1.85935 | 26.71708 | 2.45589 |
| 110.247 | 0.31239 | 26.73677 | 0.00386  | 26.73677 | 0.60424 | 26.73677 | 1.20572 | 26.7368 | 1.85606 | 26.73677 | 2.46177 |
| 110.347 | 0.31264 | 26.75646 | 0.00818  | 26.75646 | 0.60428 | 26.75646 | 1.21057 | 26.7565 | 1.85172 | 26.75646 | 2.4525  |
| 110.447 | 0.31301 | 26.77614 | 0.0053   | 26.77614 | 0.6017  | 26.77614 | 1.21088 | 26.7761 | 1.85599 | 26.77614 | 2.45583 |
| 110.547 | 0.31319 | 26.79583 | 0.00741  | 26.79583 | 0.6115  | 26.79583 | 1.21228 | 26.7958 | 1.85015 | 26.79583 | 2.44723 |
| 110.647 | 0.31372 | 26.81552 | 0.0175   | 26.81552 | 0.61198 | 26.81552 | 1.20908 | 26.8155 | 1.83992 | 26.81552 | 2.43838 |
| 110.747 | 0.31377 | 26.83521 | 0.01878  | 26.83521 | 0.6129  | 26.83521 | 1.20861 | 26.8352 | 1.8387  | 26.83521 | 2.43347 |
| 110.847 | 0.31451 | 26.8549  | 0.01246  | 26.8549  | 0.61288 | 26.8549  | 1.2096  | 26.8549 | 1.83298 | 26.8549  | 2.42426 |
| 110.947 | 0.3141  | 26.87459 | 0.01555  | 26.87459 | 0.61831 | 26.87459 | 1.21476 | 26.8746 | 1.83432 | 26.87459 | 2.42541 |
| 111.047 | 0.31403 | 26.89428 | 0.01838  | 26.89428 | 0.61948 | 26.89428 | 1.21187 | 26.8943 | 1.83016 | 26.89428 | 2.41912 |
| 111.147 | 0.31462 | 26.91397 | 0.02134  | 26.91397 | 0.6239  | 26.91397 | 1.21141 | 26.914  | 1.82488 | 26.91397 | 2.41476 |
| 111.247 | 0.31489 | 26.93366 | 0.02021  | 26.93366 | 0.62182 | 26.93366 | 1.20816 | 26.9337 | 1.82516 | 26.93366 | 2.40767 |
| 111.347 | 0.31492 | 26.95335 | 0.02434  | 26.95335 | 0.62243 | 26.95335 | 1.21053 | 26.9534 | 1.81756 | 26.95335 | 2.41483 |
| 111.447 | 0.3154  | 26.97304 | 0.02088  | 26.97304 | 0.62435 | 26.97304 | 1.21229 | 26.973  | 1.81509 | 26.97304 | 2.40453 |
| 111.547 | 0.31594 | 26.99273 | 0.02007  | 26.99273 | 0.62789 | 26.99273 | 1.20976 | 26.9927 | 1.81081 | 26.99273 | 2.40653 |
| 111.647 | 0.31628 | 27.01241 | 0.02329  | 27.01241 | 0.62381 | 27.01241 | 1.2124  | 27.0124 | 1.81184 | 27.01241 | 2.40012 |
| 111.747 | 0.31672 | 27.0321  | 0.0269   | 27.0321  | 0.6174  | 27.0321  | 1.21209 | 27.0321 | 1.81018 | 27.0321  | 2.40757 |
| 111.847 | 0.31703 | 27.05179 | 0.02006  | 27.05179 | 0.61582 | 27.05179 | 1.21286 | 27.0518 | 1.80509 | 27.05179 | 2.40897 |
| 111.947 | 0.31747 | 27.07148 | 0.02101  | 27.07148 | 0.61568 | 27.07148 | 1.20884 | 27.0715 | 1.80905 | 27.07148 | 2.4065  |
| 112.047 | 0.31781 | 27.09117 | 0.02663  | 27.09117 | 0.61628 | 27.09117 | 1.21023 | 27.0912 | 1.80834 | 27.09117 | 2.41511 |
| 112.147 | 0.31838 | 27.11086 | 0.02272  | 27.11086 | 0.61345 | 27.11086 | 1.20879 | 27.1109 | 1.80755 | 27.11086 | 2.41155 |
| 112.247 | 0.31873 | 27.13055 | 0.02905  | 27.13055 | 0.60905 | 27.13055 | 1.21034 | 27.1306 | 1.81152 | 27.13055 | 2.41434 |
| 112.347 | 0.31895 | 27.15024 | 0.02844  | 27.15024 | 0.60816 | 27.15024 | 1.20895 | 27.1502 | 1.80762 | 27.15024 | 2.41187 |
| 112.447 | 0.31938 | 27.16993 | 0.02673  | 27.16993 | 0.60482 | 27.16993 | 1.21458 | 27.1699 | 1.81046 | 27.16993 | 2.40957 |
| 112.547 | 0.31953 | 27.18962 | 0.02502  | 27.18962 | 0.611   | 27.18962 | 1.21174 | 27.1896 | 1.80755 | 27.18962 | 2.41607 |
| 112.647 | 0.31983 | 27.2093  | 0.01625  | 27.2093  | 0.60172 | 27.2093  | 1.21143 | 27.2093 | 1.81158 | 27.2093  | 2.41577 |
| 112.747 | 0.32033 | 27.22899 | 0.0229   | 27.22899 | 0.60376 | 27.22899 | 1.20508 | 27.229  | 1.82261 | 27.22899 | 2.41851 |
| 112.847 | 0.32103 | 27.24868 | 0.01594  | 27.24868 | 0.60593 | 27.24868 | 1.20994 | 27.2487 | 1.81627 | 27.24868 | 2.42016 |
| 112.947 | 0.32132 | 27.26837 | 0.00898  | 27.26837 | 0.60272 | 27.26837 | 1.20953 | 27.2684 | 1.81805 | 27.26837 | 2.42441 |
| 113.047 | 0.32175 | 27.28806 | 0.01252  | 27.28806 | 0.6176  | 27.28806 | 1.20669 | 27.2881 | 1.81746 | 27.28806 | 2.41958 |
| 113.147 | 0.32204 | 27.30775 | 0.01159  | 27.30775 | 0.60795 | 27.30775 | 1.21144 | 27.3078 | 1.81893 | 27.30775 | 2.42795 |
| 113.247 | 0.32247 | 27.32744 | 0.0106   | 27.32744 | 0.61012 | 27.32744 | 1.2084  | 27.3274 | 1.81471 | 27.32744 | 2.42663 |
| 113.347 | 0.3229  | 27.34713 | 0.01122  | 27.34713 | 0.61016 | 27.34713 | 1.21165 | 27.3471 | 1.82062 | 27.34713 | 2.42646 |
| 113.447 | 0.32305 | 27.36682 | 0.0064   | 27.36682 | 0.61565 | 27.36682 | 1.21109 | 27.3668 | 1.8224  | 27.36682 | 2.42575 |
| 113.547 | 0.32369 | 27.38651 | 0.00612  | 27.38651 | 0.61432 | 27.38651 | 1.20815 | 27.3865 | 1.81575 | 27.38651 | 2.42473 |
| 113.647 | 0.32405 | 27.4062  | 0.01102  | 27.4062  | 0.6123  | 27.4062  | 1.21006 | 27.4062 | 1.81578 | 27.4062  | 2.42511 |
| 113.747 | 0.32468 | 27.42588 | 0.00906  | 27.42588 | 0.60965 | 27.42588 | 1.21378 | 27.4259 | 1.81407 | 27.42588 | 2.42233 |

|         |         |          |         |          |         |          |         |         |         |          |         |
|---------|---------|----------|---------|----------|---------|----------|---------|---------|---------|----------|---------|
| 113.847 | 0.3249  | 27.44557 | 0.01617 | 27.44557 | 0.61414 | 27.44557 | 1.21486 | 27.4456 | 1.81354 | 27.44557 | 2.42453 |
| 113.947 | 0.32533 | 27.46526 | 0.01958 | 27.46526 | 0.61287 | 27.46526 | 1.20934 | 27.4653 | 1.8207  | 27.46526 | 2.4249  |
| 114.047 | 0.3259  | 27.48495 | 0.02209 | 27.48495 | 0.61248 | 27.48495 | 1.21497 | 27.485  | 1.81411 | 27.48495 | 2.42274 |
| 114.147 | 0.32633 | 27.50464 | 0.02265 | 27.50464 | 0.62097 | 27.50464 | 1.21389 | 27.5046 | 1.81945 | 27.50464 | 2.42354 |
| 114.247 | 0.32766 | 27.52433 | 0.02237 | 27.52433 | 0.62195 | 27.52433 | 1.21353 | 27.5243 | 1.81961 | 27.52433 | 2.42635 |
| 114.347 | 0.32761 | 27.54402 | 0.02702 | 27.54402 | 0.62381 | 27.54402 | 1.21601 | 27.544  | 1.81502 | 27.54402 | 2.4306  |
| 114.447 | 0.32748 | 27.56371 | 0.02576 | 27.56371 | 0.62705 | 27.56371 | 1.21508 | 27.5637 | 1.82262 | 27.56371 | 2.42535 |
| 114.547 | 0.32776 | 27.5834  | 0.02639 | 27.5834  | 0.62453 | 27.5834  | 1.21813 | 27.5834 | 1.82053 | 27.5834  | 2.43512 |
| 114.647 | 0.3282  | 27.60309 | 0.03311 | 27.60309 | 0.62758 | 27.60309 | 1.21597 | 27.6031 | 1.82219 | 27.60309 | 2.43592 |
| 114.747 | 0.32903 | 27.62278 | 0.03595 | 27.62278 | 0.6265  | 27.62278 | 1.21793 | 27.6228 | 1.82878 | 27.62278 | 2.4337  |
| 114.847 | 0.32933 | 27.64247 | 0.03943 | 27.64247 | 0.62629 | 27.64247 | 1.21582 | 27.6425 | 1.82782 | 27.64247 | 2.43414 |
| 114.947 | 0.32982 | 27.66215 | 0.04855 | 27.66215 | 0.62972 | 27.66215 | 1.21783 | 27.6622 | 1.8331  | 27.66215 | 2.43803 |
| 115.047 | 0.33039 | 27.68184 | 0.05197 | 27.68184 | 0.63164 | 27.68184 | 1.2137  | 27.6818 | 1.82864 | 27.68184 | 2.4389  |
| 115.147 | 0.3306  | 27.70153 | 0.05785 | 27.70153 | 0.62468 | 27.70153 | 1.2165  | 27.7015 | 1.82974 | 27.70153 | 2.43407 |
| 115.247 | 0.33117 | 27.72122 | 0.06087 | 27.72122 | 0.6276  | 27.72122 | 1.21087 | 27.7212 | 1.83002 | 27.72122 | 2.43445 |
| 115.347 | 0.33154 | 27.74091 | 0.06585 | 27.74091 | 0.62615 | 27.74091 | 1.20819 | 27.7409 | 1.82981 | 27.74091 | 2.43683 |
| 115.447 | 0.33177 | 27.7606  | 0.06894 | 27.7606  | 0.63026 | 27.7606  | 1.20571 | 27.7606 | 1.83503 | 27.7606  | 2.43424 |
| 115.547 | 0.33198 | 27.78029 | 0.07709 | 27.78029 | 0.62874 | 27.78029 | 1.2037  | 27.7803 | 1.83919 | 27.78029 | 2.43602 |
| 115.647 | 0.33209 | 27.79998 | 0.07778 | 27.79998 | 0.6301  | 27.79998 | 1.2005  | 27.8    | 1.83254 | 27.79998 | 2.43337 |
| 115.747 | 0.33387 | 27.81967 | 0.08392 | 27.81967 | 0.63221 | 27.81967 | 1.20221 | 27.8197 | 1.83264 | 27.81967 | 2.43199 |
| 115.847 | 0.33368 | 27.83936 | 0.07839 | 27.83936 | 0.62957 | 27.83936 | 1.20655 | 27.8394 | 1.83199 | 27.83936 | 2.42177 |
| 115.947 | 0.33402 | 27.85905 | 0.0822  | 27.85905 | 0.62379 | 27.85905 | 1.20903 | 27.8591 | 1.83221 | 27.85905 | 2.42682 |
| 116.047 | 0.33425 | 27.87873 | 0.07868 | 27.87873 | 0.63047 | 27.87873 | 1.20175 | 27.8787 | 1.82325 | 27.87873 | 2.42247 |
| 116.147 | 0.33426 | 27.89842 | 0.07937 | 27.89842 | 0.62626 | 27.89842 | 1.20278 | 27.8984 | 1.82585 | 27.89842 | 2.4251  |
| 116.247 | 0.33464 | 27.91811 | 0.08558 | 27.91811 | 0.63007 | 27.91811 | 1.20118 | 27.9181 | 1.82657 | 27.91811 | 2.41967 |
| 116.347 | 0.33519 | 27.9378  | 0.08076 | 27.9378  | 0.63631 | 27.9378  | 1.20491 | 27.9378 | 1.8213  | 27.9378  | 2.42108 |
| 116.447 | 0.33539 | 27.95749 | 0.08197 | 27.95749 | 0.63172 | 27.95749 | 1.20682 | 27.9575 | 1.82602 | 27.95749 | 2.41922 |
| 116.547 | 0.33556 | 27.97718 | 0.07955 | 27.97718 | 0.63496 | 27.97718 | 1.20063 | 27.9772 | 1.816   | 27.97718 | 2.41754 |
| 116.647 | 0.33613 | 27.99687 | 0.07817 | 27.99687 | 0.62938 | 27.99687 | 1.20171 | 27.9969 | 1.81535 | 27.99687 | 2.4178  |
| 116.747 | 0.33692 | 28.01656 | 0.07433 | 28.01656 | 0.6405  | 28.01656 | 1.20295 | 28.0166 | 1.81645 | 28.01656 | 2.41643 |
| 116.847 | 0.33719 | 28.03625 | 0.07217 | 28.03625 | 0.63623 | 28.03625 | 1.20084 | 28.0363 | 1.82261 | 28.03625 | 2.41863 |
| 116.947 | 0.33746 | 28.05594 | 0.06865 | 28.05594 | 0.64147 | 28.05594 | 1.2027  | 28.0559 | 1.81459 | 28.05594 | 2.41774 |
| 117.047 | 0.33787 | 28.07562 | 0.0698  | 28.07562 | 0.633   | 28.07562 | 1.20245 | 28.0756 | 1.81506 | 28.07562 | 2.41018 |
| 117.147 | 0.33781 | 28.09531 | 0.0631  | 28.09531 | 0.63368 | 28.09531 | 1.19744 | 28.0953 | 1.8206  | 28.09531 | 2.41269 |
| 117.247 | 0.33785 | 28.115   | 0.06775 | 28.115   | 0.63279 | 28.115   | 1.20018 | 28.115  | 1.8137  | 28.115   | 2.41477 |
| 117.347 | 0.33839 | 28.13469 | 0.0628  | 28.13469 | 0.63909 | 28.13469 | 1.19786 | 28.1347 | 1.81992 | 28.13469 | 2.41346 |
| 117.447 | 0.33865 | 28.15438 | 0.05714 | 28.15438 | 0.6372  | 28.15438 | 1.20101 | 28.1544 | 1.81702 | 28.15438 | 2.41481 |
| 117.547 | 0.33891 | 28.17407 | 0.05914 | 28.17407 | 0.63887 | 28.17407 | 1.20535 | 28.1741 | 1.80975 | 28.17407 | 2.41198 |
| 117.647 | 0.33966 | 28.19376 | 0.05555 | 28.19376 | 0.63291 | 28.19376 | 1.20205 | 28.1938 | 1.81579 | 28.19376 | 2.41552 |
| 117.747 | 0.34025 | 28.21345 | 0.05061 | 28.21345 | 0.63352 | 28.21345 | 1.20546 | 28.2135 | 1.8147  | 28.21345 | 2.41184 |
| 117.847 | 0.34072 | 28.23314 | 0.0489  | 28.23314 | 0.63138 | 28.23314 | 1.20118 | 28.2331 | 1.81649 | 28.23314 | 2.41228 |
| 117.947 | 0.34108 | 28.25283 | 0.0461  | 28.25283 | 0.63424 | 28.25283 | 1.20046 | 28.2528 | 1.81165 | 28.25283 | 2.40515 |
| 118.047 | 0.34138 | 28.27252 | 0.04627 | 28.27252 | 0.62866 | 28.27252 | 1.20505 | 28.2725 | 1.81094 | 28.27252 | 2.41148 |
| 118.147 | 0.34197 | 28.29221 | 0.04269 | 28.29221 | 0.62964 | 28.29221 | 1.2081  | 28.2922 | 1.81873 | 28.29221 | 2.40804 |

|         |         |          |         |          |         |          |         |         |         |          |         |
|---------|---------|----------|---------|----------|---------|----------|---------|---------|---------|----------|---------|
| 118.247 | 0.34238 | 28.31189 | 0.04955 | 28.31189 | 0.62913 | 28.31189 | 1.20955 | 28.3119 | 1.81814 | 28.31189 | 2.4123  |
| 118.347 | 0.34244 | 28.33158 | 0.04337 | 28.33158 | 0.6313  | 28.33158 | 1.20728 | 28.3316 | 1.81343 | 28.33158 | 2.4056  |
| 118.447 | 0.34282 | 28.35127 | 0.04348 | 28.35127 | 0.62835 | 28.35127 | 1.20863 | 28.3513 | 1.81503 | 28.35127 | 2.4061  |
| 118.547 | 0.34372 | 28.37096 | 0.04723 | 28.37096 | 0.63027 | 28.37096 | 1.20935 | 28.371  | 1.81069 | 28.37096 | 2.40461 |
| 118.647 | 0.34428 | 28.39065 | 0.03846 | 28.39065 | 0.63358 | 28.39065 | 1.21121 | 28.3907 | 1.80911 | 28.39065 | 2.40735 |
| 118.747 | 0.34484 | 28.41034 | 0.03546 | 28.41034 | 0.62668 | 28.41034 | 1.21189 | 28.4103 | 1.80546 | 28.41034 | 2.40077 |
| 118.847 | 0.34552 | 28.43003 | 0.04426 | 28.43003 | 0.62366 | 28.43003 | 1.21447 | 28.43   | 1.80081 | 28.43003 | 2.4     |
| 118.947 | 0.34619 | 28.44972 | 0.03828 | 28.44972 | 0.61895 | 28.44972 | 1.21479 | 28.4497 | 1.80803 | 28.44972 | 2.40146 |
| 119.047 | 0.34684 | 28.46941 | 0.04079 | 28.46941 | 0.62175 | 28.46941 | 1.21355 | 28.4694 | 1.80126 | 28.46941 | 2.39989 |
| 119.147 | 0.34715 | 28.4891  | 0.035   | 28.4891  | 0.61867 | 28.4891  | 1.21505 | 28.4891 | 1.80073 | 28.4891  | 2.40262 |
| 119.247 | 0.34755 | 28.50879 | 0.02701 | 28.50879 | 0.61966 | 28.50879 | 1.21583 | 28.5088 | 1.80265 | 28.50879 | 2.40323 |
| 119.347 | 0.34818 | 28.52847 | 0.02829 | 28.52847 | 0.61307 | 28.52847 | 1.21919 | 28.5285 | 1.7995  | 28.52847 | 2.39797 |
| 119.447 | 0.34881 | 28.54816 | 0.02756 | 28.54816 | 0.61925 | 28.54816 | 1.22161 | 28.5482 | 1.80103 | 28.54816 | 2.4024  |
| 119.547 | 0.34932 | 28.56785 | 0.02722 | 28.56785 | 0.61811 | 28.56785 | 1.21454 | 28.5679 | 1.80264 | 28.56785 | 2.39586 |
| 119.647 | 0.34993 | 28.58754 | 0.02611 | 28.58754 | 0.61697 | 28.58754 | 1.22131 | 28.5875 | 1.79555 | 28.58754 | 2.40332 |
| 119.747 | 0.35074 | 28.60723 | 0.0233  | 28.60723 | 0.61546 | 28.60723 | 1.22023 | 28.6072 | 1.79809 | 28.60723 | 2.39617 |
| 119.847 | 0.35154 | 28.62692 | 0.02128 | 28.62692 | 0.61444 | 28.62692 | 1.21873 | 28.6269 | 1.8     | 28.62692 | 2.40127 |
| 119.947 | 0.35195 | 28.64661 | 0.02048 | 28.64661 | 0.61781 | 28.64661 | 1.21554 | 28.6466 | 1.80245 | 28.64661 | 2.40194 |
| 120.047 | 0.35271 | 28.6663  | 0.01787 | 28.6663  | 0.60772 | 28.6663  | 1.22442 | 28.6663 | 1.80083 | 28.6663  | 2.40037 |
| 120.147 | 0.35304 | 28.68599 | 0.01844 | 28.68599 | 0.61559 | 28.68599 | 1.2175  | 28.686  | 1.79677 | 28.68599 | 2.39953 |
| 120.247 | 0.35423 | 28.70568 | 0.01681 | 28.70568 | 0.61151 | 28.70568 | 1.21792 | 28.7057 | 1.80047 | 28.70568 | 2.40105 |
| 120.347 | 0.35414 | 28.72536 | 0.0201  | 28.72536 | 0.60855 | 28.72536 | 1.21699 | 28.7254 | 1.80223 | 28.72536 | 2.40117 |
| 120.447 | 0.35479 | 28.74505 | 0.0206  | 28.74505 | 0.60923 | 28.74505 | 1.21963 | 28.7451 | 1.80292 | 28.74505 | 2.40469 |
| 120.547 | 0.35526 | 28.76474 | 0.01365 | 28.76474 | 0.60596 | 28.76474 | 1.2185  | 28.7647 | 1.80355 | 28.76474 | 2.40846 |
| 120.647 | 0.3557  | 28.78443 | 0.01539 | 28.78443 | 0.60882 | 28.78443 | 1.21685 | 28.7844 | 1.80644 | 28.78443 | 2.40695 |
| 120.747 | 0.35619 | 28.80412 | 0.01278 | 28.80412 | 0.612   | 28.80412 | 1.21737 | 28.8041 | 1.81269 | 28.80412 | 2.41447 |
| 120.847 | 0.35673 | 28.82381 | 0.01374 | 28.82381 | 0.61148 | 28.82381 | 1.21665 | 28.8238 | 1.81333 | 28.82381 | 2.41048 |
| 120.947 | 0.35774 | 28.8435  | 0.01048 | 28.8435  | 0.61429 | 28.8435  | 1.21479 | 28.8435 | 1.81146 | 28.8435  | 2.414   |
| 121.047 | 0.35797 | 28.86319 | 0.00768 | 28.86319 | 0.60927 | 28.86319 | 1.21376 | 28.8632 | 1.8144  | 28.86319 | 2.41382 |
| 121.147 | 0.35808 | 28.88288 | 0.01    | 28.88288 | 0.60894 | 28.88288 | 1.21387 | 28.8829 | 1.8126  | 28.88288 | 2.41577 |
| 121.247 | 0.35854 | 28.90257 | 0.01725 | 28.90257 | 0.61293 | 28.90257 | 1.21237 | 28.9026 | 1.81492 | 28.90257 | 2.41565 |
| 121.347 | 0.35881 | 28.92226 | 0.01639 | 28.92226 | 0.61517 | 28.92226 | 1.21485 | 28.9223 | 1.81355 | 28.92226 | 2.41736 |
| 121.447 | 0.35873 | 28.94195 | 0.01216 | 28.94195 | 0.61172 | 28.94195 | 1.21067 | 28.942  | 1.81837 | 28.94195 | 2.4173  |
| 121.547 | 0.3594  | 28.96164 | 0.01364 | 28.96164 | 0.61715 | 28.96164 | 1.20732 | 28.9616 | 1.81825 | 28.96164 | 2.41579 |
| 121.647 | 0.35954 | 28.98132 | 0.01531 | 28.98132 | 0.60969 | 28.98132 | 1.21161 | 28.9813 | 1.8192  | 28.98132 | 2.42598 |
| 121.747 | 0.35999 | 29.00101 | 0.01283 | 29.00101 | 0.61042 | 29.00101 | 1.21218 | 29.001  | 1.8194  | 29.00101 | 2.42423 |
| 121.847 | 0.36035 | 29.0207  | 0.01243 | 29.0207  | 0.61379 | 29.0207  | 1.20784 | 29.0207 | 1.81684 | 29.0207  | 2.42163 |
| 121.947 | 0.36086 | 29.04039 | 0.01961 | 29.04039 | 0.60733 | 29.04039 | 1.21249 | 29.0404 | 1.8146  | 29.04039 | 2.41218 |
| 122.047 | 0.3613  | 29.06008 | 0.01999 | 29.06008 | 0.60732 | 29.06008 | 1.21146 | 29.0601 | 1.81492 | 29.06008 | 2.41898 |
| 122.147 | 0.36133 | 29.07977 | 0.02088 | 29.07977 | 0.60661 | 29.07977 | 1.20511 | 29.0798 | 1.81568 | 29.07977 | 2.41517 |
| 122.247 | 0.36186 | 29.09946 | 0.01828 | 29.09946 | 0.60209 | 29.09946 | 1.20734 | 29.0995 | 1.81369 | 29.09946 | 2.42063 |
| 122.347 | 0.36187 | 29.11915 | 0.01191 | 29.11915 | 0.61109 | 29.11915 | 1.20729 | 29.1192 | 1.81176 | 29.11915 | 2.41536 |
| 122.447 | 0.36252 | 29.13884 | 0.01871 | 29.13884 | 0.60426 | 29.13884 | 1.20626 | 29.1388 | 1.81045 | 29.13884 | 2.41131 |
| 122.547 | 0.36273 | 29.15853 | 0.01324 | 29.15853 | 0.61    | 29.15853 | 1.20554 | 29.1585 | 1.8164  | 29.15853 | 2.4164  |

|         |         |          |           |          |         |          |         |         |         |          |         |
|---------|---------|----------|-----------|----------|---------|----------|---------|---------|---------|----------|---------|
| 122.647 | 0.36269 | 29.17822 | 0.01206   | 29.17822 | 0.60423 | 29.17822 | 1.20317 | 29.1782 | 1.81165 | 29.17822 | 2.41174 |
| 122.747 | 0.36307 | 29.1979  | 0.00972   | 29.1979  | 0.60641 | 29.1979  | 1.20555 | 29.1979 | 1.81154 | 29.1979  | 2.41399 |
| 122.847 | 0.3635  | 29.21759 | 0.00893   | 29.21759 | 0.60714 | 29.21759 | 1.21128 | 29.2176 | 1.81329 | 29.21759 | 2.41085 |
| 122.947 | 0.36416 | 29.23728 | 0.01021   | 29.23728 | 0.60669 | 29.23728 | 1.20457 | 29.2373 | 1.80912 | 29.23728 | 2.40971 |
| 123.047 | 0.36441 | 29.25697 | 0.00883   | 29.25697 | 0.6028  | 29.25697 | 1.20426 | 29.257  | 1.81418 | 29.25697 | 2.4185  |
| 123.147 | 0.3646  | 29.27666 | 9.76E-04  | 29.27666 | 0.60304 | 29.27666 | 1.20623 | 29.2767 | 1.81438 | 29.27666 | 2.4162  |
| 123.247 | 0.36493 | 29.29635 | 0.00628   | 29.29635 | 0.6054  | 29.29635 | 1.20726 | 29.2964 | 1.81058 | 29.29635 | 2.41839 |
| 123.347 | 0.36499 | 29.31604 | 0.00568   | 29.31604 | 0.60689 | 29.31604 | 1.20923 | 29.316  | 1.81821 | 29.31604 | 2.41561 |
| 123.447 | 0.36537 | 29.33573 | 0.0034    | 29.33573 | 0.60525 | 29.33573 | 1.20169 | 29.3357 | 1.81372 | 29.33573 | 2.41368 |
| 123.547 | 0.36565 | 29.35542 | 4.06E-04  | 29.35542 | 0.60398 | 29.35542 | 1.20133 | 29.3554 | 1.81191 | 29.35542 | 2.41496 |
| 123.647 | 0.36586 | 29.3751  | 4.58E-04  | 29.3751  | 0.60666 | 29.3751  | 1.20459 | 29.3751 | 1.80886 | 29.3751  | 2.41327 |
| 123.747 | 0.36577 | 29.39479 | -3.98E-04 | 29.39479 | 0.60108 | 29.39479 | 1.19798 | 29.3948 | 1.80987 | 29.39479 | 2.41273 |
| 123.847 | 0.36648 | 29.41448 | 1.08E-04  | 29.41448 | 0.6     | 29.41448 | 1.2     | 29.4145 | 1.81494 | 29.41448 | 2.4185  |
| 123.947 | 0.36662 | 29.43417 | 0.00386   | 29.43417 | 0.59944 | 29.43417 | 1.20436 | 29.4342 | 1.81382 | 29.43417 | 2.41893 |
| 124.047 | 0.3667  | 29.45386 | -0.00108  | 29.45386 | 0.59919 | 29.45386 | 1.20257 | 29.4539 | 1.81451 | 29.45386 | 2.41767 |
| 124.147 | 0.36668 | 29.47355 | -0.00278  | 29.47355 | 0.6017  | 29.47355 | 1.2042  | 29.4736 | 1.81577 | 29.47355 | 2.41319 |
| 124.247 | 0.36704 | 29.49324 | 0.00486   | 29.49324 | 0.6042  | 29.49324 | 1.20504 | 29.4932 | 1.81397 | 29.49324 | 2.41865 |
| 124.347 | 0.36729 | 29.51293 | 0.00141   | 29.51293 | 0.60339 | 29.51293 | 1.20383 | 29.5129 | 1.81291 | 29.51293 | 2.41969 |
| 124.447 | 0.3676  | 29.53262 | 0.00522   | 29.53262 | 0.60427 | 29.53262 | 1.20581 | 29.5326 | 1.81011 | 29.53262 | 2.42085 |
| 124.547 | 0.36785 | 29.55231 | -0.00102  | 29.55231 | 0.60152 | 29.55231 | 1.20325 | 29.5523 | 1.81593 | 29.55231 | 2.41559 |
| 124.647 | 0.36803 | 29.572   | 0.00669   | 29.572   | 0.60328 | 29.572   | 1.20307 | 29.572  | 1.81056 | 29.572   | 2.41505 |
| 124.747 | 0.36829 | 29.59169 | 0.00635   | 29.59169 | 0.6019  | 29.59169 | 1.20319 | 29.5917 | 1.81338 | 29.59169 | 2.41524 |
| 124.847 | 0.36827 | 29.61138 | 0.00375   | 29.61138 | 0.60604 | 29.61138 | 1.20156 | 29.6114 | 1.81439 | 29.61138 | 2.41901 |
| 124.947 | 0.3686  | 29.63106 | 0.00548   | 29.63106 | 0.60641 | 29.63106 | 1.20024 | 29.6311 | 1.80915 | 29.63106 | 2.41344 |
| 125.047 | 0.36903 | 29.65075 | 0.00696   | 29.65075 | 0.60867 | 29.65075 | 1.19897 | 29.6508 | 1.81103 | 29.65075 | 2.4129  |
| 125.147 | 0.36954 | 29.67044 | 0.00617   | 29.67044 | 0.60511 | 29.67044 | 1.20385 | 29.6704 | 1.81166 | 29.67044 | 2.41431 |
| 125.247 | 0.37011 | 29.69013 | 0.00804   | 29.69013 | 0.6083  | 29.69013 | 1.20521 | 29.6901 | 1.8063  | 29.69013 | 2.41298 |
| 125.347 | 0.37059 | 29.70982 | -1.15E-05 | 29.70982 | 0.60987 | 29.70982 | 1.20002 | 29.7098 | 1.80849 | 29.70982 | 2.40693 |
| 125.447 | 0.37095 | 29.72951 | 0.00769   | 29.72951 | 0.60486 | 29.72951 | 1.2004  | 29.7295 | 1.80537 | 29.72951 | 2.40773 |
| 125.547 | 0.37138 | 29.7492  | 0.00781   | 29.7492  | 0.60825 | 29.7492  | 1.20533 | 29.7492 | 1.80601 | 29.7492  | 2.40689 |
| 125.647 | 0.37184 | 29.76889 | 0.00935   | 29.76889 | 0.606   | 29.76889 | 1.20319 | 29.7689 | 1.81008 | 29.76889 | 2.40441 |
| 125.747 | 0.37185 | 29.78858 | 0.00766   | 29.78858 | 0.60099 | 29.78858 | 1.2046  | 29.7886 | 1.8079  | 29.78858 | 2.40388 |
| 125.847 | 0.37191 | 29.80827 | 0.01056   | 29.80827 | 0.606   | 29.80827 | 1.20282 | 29.8083 | 1.80641 | 29.80827 | 2.40504 |
| 125.947 | 0.37216 | 29.82796 | 6.29E-04  | 29.82796 | 0.60989 | 29.82796 | 1.19788 | 29.828  | 1.8001  | 29.82796 | 2.39983 |
| 126.047 | 0.37227 | 29.84764 | 0.00379   | 29.84764 | 0.60613 | 29.84764 | 1.20638 | 29.8476 | 1.8018  | 29.84764 | 2.39936 |
| 126.147 | 0.37268 | 29.86733 | 0.00488   | 29.86733 | 0.60952 | 29.86733 | 1.2064  | 29.8673 | 1.80093 | 29.86733 | 2.40525 |
| 126.247 | 0.373   | 29.88702 | 0.00571   | 29.88702 | 0.60214 | 29.88702 | 1.20327 | 29.887  | 1.79819 | 29.88702 | 2.3972  |
| 126.347 | 0.37342 | 29.90671 | 0.01206   | 29.90671 | 0.6052  | 29.90671 | 1.20453 | 29.9067 | 1.80332 | 29.90671 | 2.40242 |
| 126.447 | 0.37339 | 29.9264  | 0.00543   | 29.9264  | 0.60521 | 29.9264  | 1.20373 | 29.9264 | 1.8022  | 29.9264  | 2.4037  |
| 126.547 | 0.37368 | 29.94609 | 0.00924   | 29.94609 | 0.60265 | 29.94609 | 1.20809 | 29.9461 | 1.8069  | 29.94609 | 2.4028  |
| 126.647 | 0.37458 | 29.96578 | 0.00223   | 29.96578 | 0.6019  | 29.96578 | 1.20496 | 29.9658 | 1.80253 | 29.96578 | 2.40354 |
| 126.747 | 0.37493 | 29.98547 | 0.00176   | 29.98547 | 0.59996 | 29.98547 | 1.20442 | 29.9855 | 1.80173 | 29.98547 | 2.40422 |
| 126.847 | 0.375   | 30.00516 | 0         | 30.00516 | 0.60021 | 30.00516 | 1.20439 | 30.0052 | 1.80055 | 30.00516 | 2.40271 |
| 126.947 | 0.37533 | 30.02485 | -2.79E-04 | 30.02485 | 0.59859 | 30.02485 | 1.20751 | 30.0249 | 1.8048  | 30.02485 | 2.40291 |

|         |         |          |          |          |         |          |         |         |         |          |         |
|---------|---------|----------|----------|----------|---------|----------|---------|---------|---------|----------|---------|
| 127.047 | 0.37554 | 30.04453 | 0.00132  | 30.04453 | 0.60279 | 30.04453 | 1.20826 | 30.0445 | 1.80056 | 30.04453 | 2.40243 |
| 127.147 | 0.37613 | 30.06422 | 9.79E-04 | 30.06422 | 0.60411 | 30.06422 | 1.2091  | 30.0642 | 1.80507 | 30.06422 | 2.39838 |
| 127.247 | 0.37659 | 30.08391 | 0.00148  | 30.08391 | 0.60042 | 30.08391 | 1.20546 | 30.0839 | 1.80345 | 30.08391 | 2.40342 |
| 127.347 | 0.37707 | 30.1036  | 8.11E-04 | 30.1036  | 0.6003  | 30.1036  | 1.20616 | 30.1036 | 1.80134 | 30.1036  | 2.40701 |
| 127.447 | 0.37738 | 30.12329 | 0.00741  | 30.12329 | 0.60111 | 30.12329 | 1.2083  | 30.1233 | 1.80447 | 30.12329 | 2.40623 |
| 127.547 | 0.37765 | 30.14298 | 0.00486  | 30.14298 | 0.60012 | 30.14298 | 1.20357 | 30.143  | 1.80335 | 30.14298 | 2.40521 |
| 127.647 | 0.37771 | 30.16267 | 0.00406  | 30.16267 | 0.605   | 30.16267 | 1.20653 | 30.1627 | 1.80073 | 30.16267 | 2.40662 |
| 127.747 | 0.37776 | 30.18236 | 0.00216  | 30.18236 | 0.6005  | 30.18236 | 1.20005 | 30.1824 | 1.80762 | 30.18236 | 2.40827 |
| 127.847 | 0.37799 | 30.20205 | 0        | 30.20205 | 0.60144 | 30.20205 | 1.20581 | 30.2021 | 1.8     | 30.20205 | 2.40967 |
| 127.947 | 0.37876 | 30.22174 | 0.00645  | 30.22174 | 0.60101 | 30.22174 | 1.20511 | 30.2217 | 1.80425 | 30.22174 | 2.40477 |
| 128.047 | 0.37933 | 30.24143 | 0.00616  | 30.24143 | 0.60627 | 30.24143 | 1.20384 | 30.2414 | 1.80494 | 30.24143 | 2.4046  |
| 128.147 | 0.37962 | 30.26112 | 0.00347  | 30.26112 | 0.60402 | 30.26112 | 1.20572 | 30.2611 | 1.80225 | 30.26112 | 2.40649 |
| 128.247 | 0.38024 | 30.2808  | 0.00636  | 30.2808  | 0.59595 | 30.2808  | 1.20007 | 30.2808 | 1.80431 | 30.2808  | 2.4079  |
| 128.347 | 0.38037 | 30.30049 | 0.00814  | 30.30049 | 0.60484 | 30.30049 | 1.20469 | 30.3005 | 1.80718 | 30.30049 | 2.41349 |
| 128.447 | 0.38076 | 30.32018 | 0.00545  | 30.32018 | 0.60322 | 30.32018 | 1.20476 | 30.3202 | 1.80293 | 30.32018 | 2.40429 |
| 128.547 | 0.38107 | 30.33987 | 0.00562  | 30.33987 | 0.60172 | 30.33987 | 1.20081 | 30.3399 | 1.804   | 30.33987 | 2.40563 |
| 128.647 | 0.38138 | 30.35956 | 0.0096   | 30.35956 | 0.60166 | 30.35956 | 1.20471 | 30.3596 | 1.80687 | 30.35956 | 2.40952 |
| 128.747 | 0.38185 | 30.37925 | 7.54E-04 | 30.37925 | 0.61024 | 30.37925 | 1.20039 | 30.3793 | 1.80674 | 30.37925 | 2.40608 |
| 128.847 | 0.38206 | 30.39894 | 0.00416  | 30.39894 | 0.61224 | 30.39894 | 1.20522 | 30.3989 | 1.80449 | 30.39894 | 2.40397 |
| 128.947 | 0.38247 | 30.41863 | 0.0097   | 30.41863 | 0.60393 | 30.41863 | 1.20504 | 30.4186 | 1.80399 | 30.41863 | 2.40913 |
| 129.047 | 0.38309 | 30.43832 | 0.00643  | 30.43832 | 0.60681 | 30.43832 | 1.19773 | 30.4383 | 1.80724 | 30.43832 | 2.40848 |
| 129.147 | 0.38348 | 30.45801 | 0.01081  | 30.45801 | 0.60757 | 30.45801 | 1.20348 | 30.458  | 1.80537 | 30.45801 | 2.40843 |
| 129.247 | 0.38436 | 30.4777  | 0.01032  | 30.4777  | 0.60532 | 30.4777  | 1.20155 | 30.4777 | 1.80443 | 30.4777  | 2.40651 |
| 129.347 | 0.38434 | 30.49739 | 0.01165  | 30.49739 | 0.60664 | 30.49739 | 1.20369 | 30.4974 | 1.80262 | 30.49739 | 2.40652 |
| 129.447 | 0.38414 | 30.51707 | 0.01739  | 30.51707 | 0.60714 | 30.51707 | 1.20278 | 30.5171 | 1.8118  | 30.51707 | 2.41053 |
| 129.547 | 0.38464 | 30.53676 | 0.01347  | 30.53676 | 0.60952 | 30.53676 | 1.20462 | 30.5368 | 1.80268 | 30.53676 | 2.40794 |
| 129.647 | 0.38556 | 30.55645 | 0.02148  | 30.55645 | 0.60527 | 30.55645 | 1.20428 | 30.5565 | 1.80505 | 30.55645 | 2.41165 |
| 129.747 | 0.38598 | 30.57614 | 0.0256   | 30.57614 | 0.61047 | 30.57614 | 1.20435 | 30.5761 | 1.80174 | 30.57614 | 2.41172 |
| 129.847 | 0.38614 | 30.59583 | 0.02596  | 30.59583 | 0.61254 | 30.59583 | 1.20335 | 30.5958 | 1.81117 | 30.59583 | 2.40307 |
| 129.947 | 0.38663 | 30.61552 | 0.02988  | 30.61552 | 0.61142 | 30.61552 | 1.20063 | 30.6155 | 1.80811 | 30.61552 | 2.40757 |
| 130.047 | 0.38712 | 30.63521 | 0.03478  | 30.63521 | 0.61624 | 30.63521 | 1.2035  | 30.6352 | 1.80605 | 30.63521 | 2.41267 |
| 130.147 | 0.38756 | 30.6549  | 0.04084  | 30.6549  | 0.61944 | 30.6549  | 1.20766 | 30.6549 | 1.80199 | 30.6549  | 2.41062 |
| 130.247 | 0.38753 | 30.67459 | 0.03867  | 30.67459 | 0.62702 | 30.67459 | 1.20556 | 30.6746 | 1.81017 | 30.67459 | 2.40779 |
| 130.347 | 0.38838 | 30.69427 | 0.0485   | 30.69427 | 0.62646 | 30.69427 | 1.20621 | 30.6943 | 1.80523 | 30.69427 | 2.40629 |
| 130.447 | 0.38833 | 30.71396 | 0.0506   | 30.71396 | 0.6341  | 30.71396 | 1.20582 | 30.714  | 1.81461 | 30.71396 | 2.41012 |
| 130.547 | 0.38861 | 30.73365 | 0.05822  | 30.73365 | 0.63648 | 30.73365 | 1.20853 | 30.7337 | 1.80673 | 30.73365 | 2.41195 |
| 130.647 | 0.38895 | 30.75334 | 0.06228  | 30.75334 | 0.63317 | 30.75334 | 1.20819 | 30.7533 | 1.80992 | 30.75334 | 2.41027 |
| 130.747 | 0.38946 | 30.77303 | 0.07035  | 30.77303 | 0.64851 | 30.77303 | 1.2107  | 30.773  | 1.81061 | 30.77303 | 2.41076 |
| 130.847 | 0.38989 | 30.79272 | 0.06721  | 30.79272 | 0.64031 | 30.79272 | 1.21181 | 30.7927 | 1.80479 | 30.79272 | 2.41242 |
| 130.947 | 0.39015 | 30.81241 | 0.06919  | 30.81241 | 0.64107 | 30.81241 | 1.20884 | 30.8124 | 1.80829 | 30.81241 | 2.4097  |
| 131.047 | 0.39061 | 30.8321  | 0.06222  | 30.8321  | 0.64527 | 30.8321  | 1.21016 | 30.8321 | 1.80067 | 30.8321  | 2.40584 |
| 131.147 | 0.39067 | 30.85179 | 0.0629   | 30.85179 | 0.64046 | 30.85179 | 1.20951 | 30.8518 | 1.80254 | 30.85179 | 2.40622 |
| 131.247 | 0.39102 | 30.87148 | 0.05729  | 30.87148 | 0.64159 | 30.87148 | 1.20943 | 30.8715 | 1.80342 | 30.87148 | 2.4095  |
| 131.347 | 0.39186 | 30.89117 | 0.04935  | 30.89117 | 0.63452 | 30.89117 | 1.21178 | 30.8912 | 1.80392 | 30.89117 | 2.41291 |



|         |         |          |          |          |         |          |         |         |         |          |         |
|---------|---------|----------|----------|----------|---------|----------|---------|---------|---------|----------|---------|
| 131.447 | 0.3922  | 30.91086 | 0.04562  | 30.91086 | 0.63472 | 30.91086 | 1.21186 | 30.9109 | 1.79998 | 30.91086 | 2.41038 |
| 131.547 | 0.39252 | 30.93054 | 0.03813  | 30.93054 | 0.62796 | 30.93054 | 1.21091 | 30.9305 | 1.80523 | 30.93054 | 2.40845 |
| 131.647 | 0.39297 | 30.95023 | 0.03739  | 30.95023 | 0.62609 | 30.95023 | 1.21124 | 30.9502 | 1.80773 | 30.95023 | 2.41029 |
| 131.747 | 0.3927  | 30.96992 | 0.02964  | 30.96992 | 0.6276  | 30.96992 | 1.21029 | 30.9699 | 1.80579 | 30.96992 | 2.40782 |
| 131.847 | 0.39302 | 30.98961 | 0.02286  | 30.98961 | 0.62254 | 30.98961 | 1.21197 | 30.9896 | 1.80141 | 30.98961 | 2.40959 |
| 131.947 | 0.39331 | 31.0093  | 0.02322  | 31.0093  | 0.61791 | 31.0093  | 1.21447 | 31.0093 | 1.80366 | 31.0093  | 2.4096  |
| 132.047 | 0.3935  | 31.02899 | 0.01424  | 31.02899 | 0.61717 | 31.02899 | 1.21006 | 31.029  | 1.80672 | 31.02899 | 2.41059 |
| 132.147 | 0.39382 | 31.04868 | 0.01641  | 31.04868 | 0.61185 | 31.04868 | 1.20931 | 31.0487 | 1.80391 | 31.04868 | 2.41066 |
| 132.247 | 0.39391 | 31.06837 | 0.01307  | 31.06837 | 0.61299 | 31.06837 | 1.21445 | 31.0684 | 1.79985 | 31.06837 | 2.40462 |
| 132.347 | 0.39405 | 31.08806 | 0.0085   | 31.08806 | 0.61568 | 31.08806 | 1.20838 | 31.0881 | 1.80266 | 31.08806 | 2.409   |
| 132.447 | 0.39424 | 31.10775 | 0.01392  | 31.10775 | 0.61068 | 31.10775 | 1.21233 | 31.1078 | 1.80497 | 31.10775 | 2.41392 |
| 132.547 | 0.3946  | 31.12744 | 0.01305  | 31.12744 | 0.60844 | 31.12744 | 1.20838 | 31.1274 | 1.80716 | 31.12744 | 2.40472 |
| 132.647 | 0.39511 | 31.14713 | 0.01386  | 31.14713 | 0.61182 | 31.14713 | 1.20975 | 31.1471 | 1.8081  | 31.14713 | 2.41274 |
| 132.747 | 0.39522 | 31.16681 | 0.01272  | 31.16681 | 0.60657 | 31.16681 | 1.20988 | 31.1668 | 1.80972 | 31.16681 | 2.41275 |
| 132.847 | 0.39533 | 31.1865  | 0.01094  | 31.1865  | 0.60464 | 31.1865  | 1.20681 | 31.1865 | 1.8066  | 31.1865  | 2.40562 |
| 132.947 | 0.39583 | 31.20619 | 0.01357  | 31.20619 | 0.6074  | 31.20619 | 1.20792 | 31.2062 | 1.81072 | 31.20619 | 2.40569 |
| 133.047 | 0.39606 | 31.22588 | 0.00887  | 31.22588 | 0.60916 | 31.22588 | 1.2048  | 31.2259 | 1.80828 | 31.22588 | 2.4105  |
| 133.147 | 0.39617 | 31.24557 | 0.01208  | 31.24557 | 0.60641 | 31.24557 | 1.20375 | 31.2456 | 1.81047 | 31.24557 | 2.41027 |
| 133.247 | 0.39615 | 31.26526 | 0.0077   | 31.26526 | 0.60648 | 31.26526 | 1.20744 | 31.2653 | 1.80947 | 31.26526 | 2.41313 |
| 133.347 | 0.39655 | 31.28495 | 0.01013  | 31.28495 | 0.60492 | 31.28495 | 1.21    | 31.285  | 1.80584 | 31.28495 | 2.40933 |
| 133.447 | 0.39666 | 31.30464 | 0.00693  | 31.30464 | 0.60399 | 31.30464 | 1.20935 | 31.3046 | 1.80366 | 31.30464 | 2.40929 |
| 133.547 | 0.39704 | 31.32433 | 0.01169  | 31.32433 | 0.60463 | 31.32433 | 1.20675 | 31.3243 | 1.8084  | 31.32433 | 2.40403 |
| 133.647 | 0.3973  | 31.34402 | 0.01212  | 31.34402 | 0.60307 | 31.34402 | 1.20838 | 31.344  | 1.8109  | 31.34402 | 2.4075  |
| 133.747 | 0.39765 | 31.3637  | 0.00994  | 31.3637  | 0.60489 | 31.3637  | 1.20815 | 31.3637 | 1.81228 | 31.3637  | 2.40624 |
| 133.847 | 0.39772 | 31.38339 | 0.00803  | 31.38339 | 0.60252 | 31.38339 | 1.21034 | 31.3834 | 1.80634 | 31.38339 | 2.40729 |
| 133.947 | 0.39832 | 31.40308 | 0.00722  | 31.40308 | 0.60021 | 31.40308 | 1.20727 | 31.4031 | 1.80153 | 31.40308 | 2.40555 |
| 134.047 | 0.39884 | 31.42277 | 0.00563  | 31.42277 | 0.60328 | 31.42277 | 1.20761 | 31.4228 | 1.8074  | 31.42277 | 2.4055  |
| 134.147 | 0.39908 | 31.44246 | 0.00268  | 31.44246 | 0.60417 | 31.44246 | 1.208   | 31.4425 | 1.80246 | 31.44246 | 2.40794 |
| 134.247 | 0.39919 | 31.46215 | 5.93E-05 | 31.46215 | 0.60211 | 31.46215 | 1.20958 | 31.4622 | 1.80096 | 31.46215 | 2.40311 |
| 134.347 | 0.39964 | 31.48184 | 0.00145  | 31.48184 | 0.60199 | 31.48184 | 1.21363 | 31.4818 | 1.80465 | 31.48184 | 2.40349 |
| 134.447 | 0.4001  | 31.50153 | 0.00369  | 31.50153 | 0.60043 | 31.50153 | 1.20695 | 31.5015 | 1.8059  | 31.50153 | 2.40314 |
| 134.547 | 0.40024 | 31.52122 | 0.00314  | 31.52122 | 0.60307 | 31.52122 | 1.21297 | 31.5212 | 1.80596 | 31.52122 | 2.40886 |
| 134.647 | 0.4007  | 31.54091 | 0.00395  | 31.54091 | 0.60007 | 31.54091 | 1.20675 | 31.5409 | 1.8079  | 31.54091 | 2.40251 |
| 134.747 | 0.40059 | 31.5606  | 6.80E-04 | 31.5606  | 0.6014  | 31.5606  | 1.21158 | 31.5606 | 1.80071 | 31.5606  | 2.4058  |
| 134.847 | 0.40119 | 31.58028 | 0        | 31.58028 | 0.60247 | 31.58028 | 1.21037 | 31.5803 | 1.80046 | 31.58028 | 2.40139 |
| 134.947 | 0.40173 | 31.59997 | 0.00395  | 31.59997 | 0.60629 | 31.59997 | 1.21334 | 31.6    | 1.80102 | 31.59997 | 2.40462 |
| 135.047 | 0.40213 | 31.61966 | 0.00491  | 31.61966 | 0.60192 | 31.61966 | 1.20124 | 31.6197 | 1.80202 | 31.61966 | 2.40645 |
| 135.147 | 0.40278 | 31.63935 | 0.0014   | 31.63935 | 0.60143 | 31.63935 | 1.20999 | 31.6394 | 1.80402 | 31.63935 | 2.40241 |
| 135.247 | 0.40323 | 31.65904 | 0.00573  | 31.65904 | 0.60112 | 31.65904 | 1.2047  | 31.659  | 1.80427 | 31.65904 | 2.40637 |
| 135.347 | 0.40325 | 31.67873 | 4.70E-04 | 31.67873 | 0.60288 | 31.67873 | 1.20463 | 31.6787 | 1.79996 | 31.67873 | 2.40274 |
| 135.447 | 0.40349 | 31.69842 | 0.00325  | 31.69842 | 0.59838 | 31.69842 | 1.20089 | 31.6984 | 1.80496 | 31.69842 | 2.40155 |
| 135.547 | 0.40369 | 31.71811 | -0.00175 | 31.71811 | 0.59752 | 31.71811 | 1.2052  | 31.7181 | 1.80102 | 31.71811 | 2.40647 |
| 135.647 | 0.40394 | 31.7378  | 0.00284  | 31.7378  | 0.60541 | 31.7378  | 1.20389 | 31.7378 | 1.80533 | 31.7378  | 2.40388 |
| 135.747 | 0.40411 | 31.75749 | 0.00808  | 31.75749 | 0.59878 | 31.75749 | 1.2065  | 31.7575 | 1.80083 | 31.75749 | 2.40208 |

|         |         |          |           |          |         |          |         |         |         |          |         |
|---------|---------|----------|-----------|----------|---------|----------|---------|---------|---------|----------|---------|
| 135.847 | 0.40467 | 31.77718 | 0.00606   | 31.77718 | 0.60298 | 31.77718 | 1.20586 | 31.7772 | 1.80058 | 31.77718 | 2.40495 |
| 135.947 | 0.40476 | 31.79687 | 0.00664   | 31.79687 | 0.60362 | 31.79687 | 1.20264 | 31.7969 | 1.80083 | 31.79687 | 2.40424 |
| 136.047 | 0.40498 | 31.81656 | 0.0076    | 31.81656 | 0.59962 | 31.81656 | 1.20303 | 31.8166 | 1.80389 | 31.81656 | 2.40632 |
| 136.147 | 0.40531 | 31.83624 | 0.00175   | 31.83624 | 0.60188 | 31.83624 | 1.20275 | 31.8362 | 1.80027 | 31.83624 | 2.40233 |
| 136.247 | 0.40556 | 31.85593 | 9.01E-04  | 31.85593 | 0.60195 | 31.85593 | 1.2034  | 31.8559 | 1.80351 | 31.85593 | 2.40489 |
| 136.347 | 0.40552 | 31.87562 | 0.00154   | 31.87562 | 0.59983 | 31.87562 | 1.20374 | 31.8756 | 1.80701 | 31.87562 | 2.40661 |
| 136.447 | 0.40595 | 31.89531 | 0.00425   | 31.89531 | 0.5984  | 31.89531 | 1.20335 | 31.8953 | 1.79858 | 31.89531 | 2.40444 |
| 136.547 | 0.40617 | 31.915   | 8.72E-04  | 31.915   | 0.6001  | 31.915   | 1.19946 | 31.915  | 1.80383 | 31.915   | 2.40749 |
| 136.647 | 0.40658 | 31.93469 | -3.05E-04 | 31.93469 | 0.59811 | 31.93469 | 1.20238 | 31.9347 | 1.80051 | 31.93469 | 2.40351 |
| 136.747 | 0.4066  | 31.95438 | 0.00533   | 31.95438 | 0.60268 | 31.95438 | 1.19864 | 31.9544 | 1.80626 | 31.95438 | 2.4091  |
| 136.847 | 0.40663 | 31.97407 | 0.00473   | 31.97407 | 0.60401 | 31.97407 | 1.20136 | 31.9741 | 1.80551 | 31.97407 | 2.40451 |
| 136.947 | 0.40673 | 31.99376 | 3.79E-04  | 31.99376 | 0.60796 | 31.99376 | 1.20113 | 31.9938 | 1.80445 | 31.99376 | 2.40798 |
| 137.047 | 0.4066  | 32.01345 | 0.00394   | 32.01345 | 0.6019  | 32.01345 | 1.19899 | 32.0135 | 1.8037  | 32.01345 | 2.40915 |
| 137.147 | 0.40654 | 32.03313 | 0.00308   | 32.03313 | 0.60147 | 32.03313 | 1.20207 | 32.0331 | 1.80288 | 32.03313 | 2.40826 |
| 137.247 | 0.40615 | 32.05282 | 0.00567   | 32.05282 | 0.60648 | 32.05282 | 1.20205 | 32.0528 | 1.8027  | 32.05282 | 2.40488 |
| 137.347 | 0.40629 | 32.07251 | 0.00994   | 32.07251 | 0.60668 | 32.07251 | 1.2028  | 32.0725 | 1.80207 | 32.07251 | 2.40793 |
| 137.447 | 0.40652 | 32.0922  | 0.00571   | 32.0922  | 0.60212 | 32.0922  | 1.20103 | 32.0922 | 1.80332 | 32.0922  | 2.40879 |
| 137.547 | 0.40713 | 32.11189 | 0.00577   | 32.11189 | 0.60463 | 32.11189 | 1.19987 | 32.1119 | 1.80463 | 32.11189 | 2.40681 |
| 137.647 | 0.40743 | 32.13158 | 0.01043   | 32.13158 | 0.6057  | 32.13158 | 1.20315 | 32.1316 | 1.80394 | 32.13158 | 2.40531 |
| 137.747 | 0.40695 | 32.15127 | 0.00529   | 32.15127 | 0.60966 | 32.15127 | 1.20659 | 32.1513 | 1.80894 | 32.15127 | 2.40345 |
| 137.847 | 0.40677 | 32.17096 | 0.00963   | 32.17096 | 0.6071  | 32.17096 | 1.20203 | 32.171  | 1.80394 | 32.17096 | 2.40335 |
| 137.947 | 0.40654 | 32.19065 | 0.01001   | 32.19065 | 0.60855 | 32.19065 | 1.20495 | 32.1907 | 1.80519 | 32.19065 | 2.4033  |
| 138.047 | 0.40682 | 32.21033 | 0.01169   | 32.21033 | 0.61075 | 32.21033 | 1.20297 | 32.2103 | 1.80238 | 32.21033 | 2.40853 |
| 138.147 | 0.40687 | 32.23003 | 0.01012   | 32.23003 | 0.608   | 32.23003 | 1.20522 | 32.23   | 1.80057 | 32.23003 | 2.40582 |
| 138.247 | 0.40626 | 32.24971 | 0.0105    | 32.24971 | 0.6112  | 32.24971 | 1.20758 | 32.2497 | 1.80088 | 32.24971 | 2.40651 |
| 138.347 | 0.40597 | 32.26941 | 0.00861   | 32.26941 | 0.61284 | 32.26941 | 1.20213 | 32.2694 | 1.80394 | 32.26941 | 2.40349 |
| 138.447 | 0.40591 | 32.28909 | 0.01197   | 32.28909 | 0.60878 | 32.28909 | 1.20624 | 32.2891 | 1.79594 | 32.28909 | 2.40539 |
| 138.547 | 0.4059  | 32.30878 | 0.01248   | 32.30878 | 0.61273 | 32.30878 | 1.20767 | 32.3088 | 1.80275 | 32.30878 | 2.40698 |
| 138.647 | 0.40557 | 32.32847 | 0.01694   | 32.32847 | 0.6108  | 32.32847 | 1.20941 | 32.3285 | 1.80194 | 32.32847 | 2.40651 |
| 138.747 | 0.40533 | 32.34816 | 0.01039   | 32.34816 | 0.6135  | 32.34816 | 1.21181 | 32.3482 | 1.79875 | 32.34816 | 2.40368 |
| 138.847 | 0.40526 | 32.36785 | 0.01511   | 32.36785 | 0.61439 | 32.36785 | 1.20766 | 32.3679 | 1.8     | 32.36785 | 2.4     |
| 138.947 | 0.40455 | 32.38754 | 0.01795   | 32.38754 | 0.61571 | 32.38754 | 1.21007 | 32.3875 | 1.80158 | 32.38754 | 2.40591 |
| 139.047 | 0.40441 | 32.40723 | 0.01749   | 32.40723 | 0.6109  | 32.40723 | 1.20948 | 32.4072 | 1.79853 | 32.40723 | 2.40503 |
| 139.147 | 0.40411 | 32.42692 | 0.01683   | 32.42692 | 0.62086 | 32.42692 | 1.21117 | 32.4269 | 1.79673 | 32.42692 | 2.40554 |
| 139.247 | 0.40355 | 32.44661 | 0.02026   | 32.44661 | 0.61862 | 32.44661 | 1.21042 | 32.4466 | 1.80256 | 32.44661 | 2.4043  |
| 139.347 | 0.4032  | 32.46629 | 0.01694   | 32.46629 | 0.61894 | 32.46629 | 1.21242 | 32.4663 | 1.79864 | 32.46629 | 2.40615 |
| 139.447 | 0.40272 | 32.48598 | 0.02264   | 32.48598 | 0.61601 | 32.48598 | 1.20806 | 32.486  | 1.80203 | 32.48598 | 2.40709 |
| 139.547 | 0.40204 | 32.50567 | 0.01893   | 32.50567 | 0.61608 | 32.50567 | 1.20866 | 32.5057 | 1.80279 | 32.50567 | 2.40239 |
| 139.647 | 0.4017  | 32.52536 | 0.02398   | 32.52536 | 0.62066 | 32.52536 | 1.20652 | 32.5254 | 1.80431 | 32.52536 | 2.40181 |
| 139.747 | 0.4015  | 32.54505 | 0.02209   | 32.54505 | 0.61059 | 32.54505 | 1.21265 | 32.5451 | 1.7967  | 32.54505 | 2.4056  |
| 139.847 | 0.40142 | 32.56474 | 0.02279   | 32.56474 | 0.60872 | 32.56474 | 1.2102  | 32.5647 | 1.80046 | 32.56474 | 2.4063  |
| 139.947 | 0.40036 | 32.58443 | 0.02486   | 32.58443 | 0.61574 | 32.58443 | 1.21148 | 32.5844 | 1.8016  | 32.58443 | 2.40384 |
| 140.047 | 0.40035 | 32.60412 | 0.01895   | 32.60412 | 0.60943 | 32.60412 | 1.20815 | 32.6041 | 1.80149 | 32.60412 | 2.41005 |
| 140.147 | 0.40013 | 32.62381 | 0.02186   | 32.62381 | 0.61307 | 32.62381 | 1.20989 | 32.6238 | 1.80082 | 32.62381 | 2.40433 |

|         |         |          |           |          |         |          |         |         |         |          |         |
|---------|---------|----------|-----------|----------|---------|----------|---------|---------|---------|----------|---------|
| 140.247 | 0.39973 | 32.6435  | 0.01847   | 32.6435  | 0.61615 | 32.6435  | 1.21168 | 32.6435 | 1.79815 | 32.6435  | 2.40714 |
| 140.347 | 0.39932 | 32.66319 | 0.01983   | 32.66319 | 0.60883 | 32.66319 | 1.20639 | 32.6632 | 1.80173 | 32.66319 | 2.40396 |
| 140.447 | 0.39867 | 32.68287 | 0.02098   | 32.68287 | 0.60465 | 32.68287 | 1.20885 | 32.6829 | 1.80336 | 32.68287 | 2.40654 |
| 140.547 | 0.39827 | 32.70256 | 0.01786   | 32.70256 | 0.60841 | 32.70256 | 1.2048  | 32.7026 | 1.80113 | 32.70256 | 2.40917 |
| 140.647 | 0.39794 | 32.72225 | 0.01539   | 32.72225 | 0.60855 | 32.72225 | 1.20995 | 32.7223 | 1.80402 | 32.72225 | 2.40429 |
| 140.747 | 0.39729 | 32.74194 | 0.02108   | 32.74194 | 0.60731 | 32.74194 | 1.2057  | 32.7419 | 1.8026  | 32.74194 | 2.40553 |
| 140.847 | 0.39681 | 32.76163 | 0.01738   | 32.76163 | 0.60394 | 32.76163 | 1.20542 | 32.7616 | 1.80274 | 32.76163 | 2.40708 |
| 140.947 | 0.39634 | 32.78132 | 0.0162    | 32.78132 | 0.60363 | 32.78132 | 1.20731 | 32.7813 | 1.80675 | 32.78132 | 2.4065  |
| 141.047 | 0.39624 | 32.80101 | 0.01224   | 32.80101 | 0.60915 | 32.80101 | 1.20497 | 32.801  | 1.80333 | 32.80101 | 2.40756 |
| 141.147 | 0.3951  | 32.8207  | 0.00795   | 32.8207  | 0.60735 | 32.8207  | 1.20402 | 32.8207 | 1.80297 | 32.8207  | 2.40329 |
| 141.247 | 0.39486 | 32.84039 | 0.01157   | 32.84039 | 0.60072 | 32.84039 | 1.20369 | 32.8404 | 1.80242 | 32.84039 | 2.40253 |
| 141.347 | 0.39423 | 32.86008 | 0.01195   | 32.86008 | 0.60743 | 32.86008 | 1.20151 | 32.8601 | 1.80819 | 32.86008 | 2.40838 |
| 141.447 | 0.39382 | 32.87976 | 0.00785   | 32.87976 | 0.60224 | 32.87976 | 1.19658 | 32.8798 | 1.80764 | 32.87976 | 2.40598 |
| 141.547 | 0.39316 | 32.89946 | 0.00719   | 32.89946 | 0.601   | 32.89946 | 1.2008  | 32.8995 | 1.80428 | 32.89946 | 2.40365 |
| 141.647 | 0.3921  | 32.91914 | 0.0053    | 32.91914 | 0.60408 | 32.91914 | 1.20372 | 32.9191 | 1.80136 | 32.91914 | 2.40447 |
| 141.747 | 0.39172 | 32.93883 | 0.00361   | 32.93883 | 0.59996 | 32.93883 | 1.19596 | 32.9388 | 1.80881 | 32.93883 | 2.40056 |
| 141.847 | 0.3915  | 32.95852 | 0.00587   | 32.95852 | 0.6031  | 32.95852 | 1.20043 | 32.9585 | 1.80351 | 32.95852 | 2.4001  |
| 141.947 | 0.39133 | 32.97821 | 0.00579   | 32.97821 | 0.60116 | 32.97821 | 1.20444 | 32.9782 | 1.79997 | 32.97821 | 2.40413 |
| 142.047 | 0.39042 | 32.9979  | 0.0041    | 32.9979  | 0.60274 | 32.9979  | 1.20251 | 32.9979 | 1.79842 | 32.9979  | 2.40659 |
| 142.147 | 0.38983 | 33.01759 | 0.00396   | 33.01759 | 0.60419 | 33.01759 | 1.19759 | 33.0176 | 1.80812 | 33.01759 | 2.40371 |
| 142.247 | 0.38929 | 33.03728 | 0.00265   | 33.03728 | 0.59919 | 33.03728 | 1.20289 | 33.0373 | 1.8007  | 33.03728 | 2.40465 |
| 142.347 | 0.38815 | 33.05697 | 0.0066    | 33.05697 | 0.60133 | 33.05697 | 1.20184 | 33.057  | 1.80634 | 33.05697 | 2.4068  |
| 142.447 | 0.38761 | 33.07666 | 0.00425   | 33.07666 | 0.60465 | 33.07666 | 1.20033 | 33.0767 | 1.80123 | 33.07666 | 2.40471 |
| 142.547 | 0.38694 | 33.09634 | 0.00373   | 33.09634 | 0.6046  | 33.09634 | 1.19943 | 33.0963 | 1.79731 | 33.09634 | 2.40371 |
| 142.647 | 0.38604 | 33.11604 | 6.68E-04  | 33.11604 | 0.60361 | 33.11604 | 1.20251 | 33.116  | 1.80163 | 33.11604 | 2.40095 |
| 142.747 | 0.38448 | 33.13572 | 0.0015    | 33.13572 | 0.60569 | 33.13572 | 1.19619 | 33.1357 | 1.79684 | 33.13572 | 2.4037  |
| 142.847 | 0.38416 | 33.15541 | 0         | 33.15541 | 0.6     | 33.15541 | 1.20062 | 33.1554 | 1.8026  | 33.15541 | 2.40337 |
| 142.947 | 0.38347 | 33.1751  | 0.00586   | 33.1751  | 0.60315 | 33.1751  | 1.20101 | 33.1751 | 1.80193 | 33.1751  | 2.40734 |
| 143.047 | 0.38274 | 33.19479 | 0.00289   | 33.19479 | 0.6058  | 33.19479 | 1.19903 | 33.1948 | 1.80625 | 33.19479 | 2.40246 |
| 143.147 | 0.38171 | 33.21448 | -9.12E-04 | 33.21448 | 0.60244 | 33.21448 | 1.20382 | 33.2145 | 1.80289 | 33.21448 | 2.40007 |
| 143.247 | 0.3807  | 33.23417 | 0.00319   | 33.23417 | 0.60359 | 33.23417 | 1.1975  | 33.2342 | 1.80066 | 33.23417 | 2.40506 |
| 143.347 | 0.38037 | 33.25386 | -0.0023   | 33.25386 | 0.6073  | 33.25386 | 1.20228 | 33.2539 | 1.80036 | 33.25386 | 2.4017  |
| 143.447 | 0.38015 | 33.27355 | -4.62E-04 | 33.27355 | 0.60738 | 33.27355 | 1.20196 | 33.2736 | 1.80213 | 33.27355 | 2.40361 |
| 143.547 | 0.37932 | 33.29324 | 0.00144   | 33.29324 | 0.60928 | 33.29324 | 1.20173 | 33.2932 | 1.79902 | 33.29324 | 2.40097 |
| 143.647 | 0.37832 | 33.31293 | 0.00477   | 33.31293 | 0.6053  | 33.31293 | 1.2012  | 33.3129 | 1.80184 | 33.31293 | 2.40415 |
| 143.747 | 0.37729 | 33.33261 | 0.00738   | 33.33261 | 0.61051 | 33.33261 | 1.20201 | 33.3326 | 1.79905 | 33.33261 | 2.40673 |
| 143.847 | 0.37568 | 33.3523  | 0.0061    | 33.3523  | 0.60215 | 33.3523  | 1.20183 | 33.3523 | 1.8     | 33.3523  | 2.40118 |
| 143.947 | 0.37506 | 33.37199 | 0.00898   | 33.37199 | 0.60636 | 33.37199 | 1.20084 | 33.372  | 1.79803 | 33.37199 | 2.40248 |
| 144.047 | 0.37383 | 33.39168 | 0.00342   | 33.39168 | 0.61202 | 33.39168 | 1.20459 | 33.3917 | 1.80286 | 33.39168 | 2.4027  |
| 144.147 | 0.37261 | 33.41137 | 0.00649   | 33.41137 | 0.61054 | 33.41137 | 1.19977 | 33.4114 | 1.7997  | 33.41137 | 2.40648 |
| 144.247 | 0.37244 | 33.43106 | 0.00372   | 33.43106 | 0.61544 | 33.43106 | 1.20089 | 33.4311 | 1.80347 | 33.43106 | 2.40336 |
| 144.347 | 0.37188 | 33.45075 | 0.00459   | 33.45075 | 0.61014 | 33.45075 | 1.20051 | 33.4508 | 1.80456 | 33.45075 | 2.40818 |
| 144.447 | 0.37052 | 33.47044 | 0.00545   | 33.47044 | 0.60866 | 33.47044 | 1.20225 | 33.4704 | 1.80552 | 33.47044 | 2.40227 |
| 144.547 | 0.36976 | 33.49013 | 0.00982   | 33.49013 | 0.61094 | 33.49013 | 1.19738 | 33.4901 | 1.79905 | 33.49013 | 2.4106  |

|         |         |          |          |          |         |          |         |         |         |          |         |
|---------|---------|----------|----------|----------|---------|----------|---------|---------|---------|----------|---------|
| 144.647 | 0.36887 | 33.50982 | 0.00932  | 33.50982 | 0.61359 | 33.50982 | 1.19984 | 33.5098 | 1.80514 | 33.50982 | 2.41124 |
| 144.747 | 0.36715 | 33.52951 | 0.01116  | 33.52951 | 0.60998 | 33.52951 | 1.20349 | 33.5295 | 1.80472 | 33.52951 | 2.4129  |
| 144.847 | 0.36595 | 33.54919 | 0.01286  | 33.54919 | 0.60718 | 33.54919 | 1.20006 | 33.5492 | 1.8015  | 33.54919 | 2.41269 |
| 144.947 | 0.36506 | 33.56889 | 0.00984  | 33.56889 | 0.61365 | 33.56889 | 1.20325 | 33.5689 | 1.80559 | 33.56889 | 2.41024 |
| 145.047 | 0.36375 | 33.58857 | 0.0142   | 33.58857 | 0.61004 | 33.58857 | 1.20039 | 33.5886 | 1.80417 | 33.58857 | 2.40899 |
| 145.147 | 0.36188 | 33.60826 | 0.01332  | 33.60826 | 0.60919 | 33.60826 | 1.20073 | 33.6083 | 1.80632 | 33.60826 | 2.40805 |
| 145.247 | 0.36096 | 33.62795 | 0.01645  | 33.62795 | 0.60189 | 33.62795 | 1.20392 | 33.628  | 1.80829 | 33.62795 | 2.41457 |
| 145.347 | 0.36013 | 33.64764 | 0.01764  | 33.64764 | 0.60848 | 33.64764 | 1.20349 | 33.6476 | 1.80069 | 33.64764 | 2.41381 |
| 145.447 | 0.35883 | 33.66733 | 0.01338  | 33.66733 | 0.60794 | 33.66733 | 1.20378 | 33.6673 | 1.81009 | 33.66733 | 2.41269 |
| 145.547 | 0.35724 | 33.68702 | 0.01574  | 33.68702 | 0.60972 | 33.68702 | 1.19999 | 33.687  | 1.80861 | 33.68702 | 2.41102 |
| 145.647 | 0.3557  | 33.70671 | 0.01213  | 33.70671 | 0.60962 | 33.70671 | 1.20338 | 33.7067 | 1.80976 | 33.70671 | 2.41063 |
| 145.747 | 0.35423 | 33.7264  | 0.00878  | 33.7264  | 0.60839 | 33.7264  | 1.20275 | 33.7264 | 1.80941 | 33.7264  | 2.41205 |
| 145.847 | 0.35352 | 33.74609 | 0.00971  | 33.74609 | 0.60847 | 33.74609 | 1.2048  | 33.7461 | 1.80625 | 33.74609 | 2.40923 |
| 145.947 | 0.35306 | 33.76577 | 0.00688  | 33.76577 | 0.60856 | 33.76577 | 1.20509 | 33.7658 | 1.81059 | 33.76577 | 2.41059 |
| 146.047 | 0.35106 | 33.78547 | 0.00866  | 33.78547 | 0.6052  | 33.78547 | 1.20497 | 33.7855 | 1.8088  | 33.78547 | 2.40759 |
| 146.147 | 0.34945 | 33.80515 | 0.00453  | 33.80515 | 0.60911 | 33.80515 | 1.20676 | 33.8052 | 1.81145 | 33.80515 | 2.40859 |
| 146.247 | 0.3482  | 33.82484 | 0.00695  | 33.82484 | 0.61357 | 33.82484 | 1.20581 | 33.8248 | 1.80597 | 33.82484 | 2.40899 |
| 146.347 | 0.34681 | 33.84453 | 0.00892  | 33.84453 | 0.60972 | 33.84453 | 1.20156 | 33.8445 | 1.80787 | 33.84453 | 2.40665 |
| 146.447 | 0.34507 | 33.86422 | 0.00687  | 33.86422 | 0.60799 | 33.86422 | 1.20754 | 33.8642 | 1.80696 | 33.86422 | 2.41201 |
| 146.547 | 0.34333 | 33.88391 | 0.00572  | 33.88391 | 0.60995 | 33.88391 | 1.20447 | 33.8839 | 1.80799 | 33.88391 | 2.40465 |
| 146.647 | 0.34187 | 33.9036  | 0.00348  | 33.9036  | 0.61342 | 33.9036  | 1.20895 | 33.9036 | 1.80795 | 33.9036  | 2.40995 |
| 146.747 | 0.34025 | 33.92329 | 0.00817  | 33.92329 | 0.60719 | 33.92329 | 1.208   | 33.9233 | 1.8056  | 33.92329 | 2.41053 |
| 146.847 | 0.34003 | 33.94298 | 0.00495  | 33.94298 | 0.61115 | 33.94298 | 1.20829 | 33.943  | 1.812   | 33.94298 | 2.40728 |
| 146.947 | 0.33678 | 33.96267 | 0.00588  | 33.96267 | 0.61431 | 33.96267 | 1.21045 | 33.9627 | 1.81021 | 33.96267 | 2.41004 |
| 147.047 | 0.33572 | 33.98236 | 0.00591  | 33.98236 | 0.60682 | 33.98236 | 1.20857 | 33.9824 | 1.80586 | 33.98236 | 2.40619 |
| 147.147 | 0.33498 | 34.00204 | 0.00353  | 34.00204 | 0.6081  | 34.00204 | 1.20334 | 34.002  | 1.81245 | 34.00204 | 2.40737 |
| 147.247 | 0.33227 | 34.02173 | 0.00531  | 34.02173 | 0.60756 | 34.02173 | 1.20916 | 34.0217 | 1.81116 | 34.02173 | 2.40662 |
| 147.347 | 0.33018 | 34.04142 | 0.00909  | 34.04142 | 0.60634 | 34.04142 | 1.2063  | 34.0414 | 1.81125 | 34.04142 | 2.4098  |
| 147.447 | 0.32926 | 34.06111 | 0.01074  | 34.06111 | 0.60523 | 34.06111 | 1.20427 | 34.0611 | 1.8074  | 34.06111 | 2.41298 |
| 147.547 | 0.32679 | 34.0808  | 0.01057  | 34.0808  | 0.60707 | 34.0808  | 1.20901 | 34.0808 | 1.80599 | 34.0808  | 2.41101 |
| 147.647 | 0.32556 | 34.10049 | 0.00586  | 34.10049 | 0.60873 | 34.10049 | 1.20847 | 34.1005 | 1.80714 | 34.10049 | 2.40776 |
| 147.747 | 0.3239  | 34.12018 | 0.00394  | 34.12018 | 0.606   | 34.12018 | 1.20525 | 34.1202 | 1.80629 | 34.12018 | 2.40816 |
| 147.847 | 0.32223 | 34.13987 | 0.00312  | 34.13987 | 0.61034 | 34.13987 | 1.20751 | 34.1399 | 1.81112 | 34.13987 | 2.41116 |
| 147.947 | 0.32034 | 34.15956 | 0.00263  | 34.15956 | 0.60737 | 34.15956 | 1.20439 | 34.1596 | 1.80746 | 34.15956 | 2.40658 |
| 148.047 | 0.3188  | 34.17924 | 0.00583  | 34.17924 | 0.6089  | 34.17924 | 1.20174 | 34.1792 | 1.80799 | 34.17924 | 2.40661 |
| 148.147 | 0.31713 | 34.19894 | 0.0056   | 34.19894 | 0.60755 | 34.19894 | 1.2025  | 34.1989 | 1.81007 | 34.19894 | 2.40652 |
| 148.247 | 0.31475 | 34.21862 | 0.00919  | 34.21862 | 0.60463 | 34.21862 | 1.20269 | 34.2186 | 1.80972 | 34.21862 | 2.40419 |
| 148.347 | 0.3128  | 34.23831 | -0.00109 | 34.23831 | 0.6046  | 34.23831 | 1.20433 | 34.2383 | 1.80556 | 34.23831 | 2.40943 |
| 148.447 | 0.31041 | 34.258   | 0.00477  | 34.258   | 0.60462 | 34.258   | 1.20529 | 34.258  | 1.80815 | 34.258   | 2.40855 |
| 148.547 | 0.30853 | 34.27769 | 0.00882  | 34.27769 | 0.60396 | 34.27769 | 1.20362 | 34.2777 | 1.80536 | 34.27769 | 2.40397 |
| 148.647 | 0.30776 | 34.29738 | 0.00392  | 34.29738 | 0.60023 | 34.29738 | 1.20128 | 34.2974 | 1.80476 | 34.29738 | 2.40582 |
| 148.747 | 0.30624 | 34.31707 | 9.60E-04 | 34.31707 | 0.60614 | 34.31707 | 1.20235 | 34.3171 | 1.79929 | 34.31707 | 2.40403 |
| 148.847 | 0.30393 | 34.33676 | 0.00611  | 34.33676 | 0.60586 | 34.33676 | 1.2012  | 34.3368 | 1.8     | 34.33676 | 2.4     |
| 148.947 | 0.30175 | 34.35645 | 0.00523  | 34.35645 | 0.61089 | 34.35645 | 1.20655 | 34.3565 | 1.80345 | 34.35645 | 2.40122 |

|         |         |          |           |          |         |          |         |         |         |          |         |
|---------|---------|----------|-----------|----------|---------|----------|---------|---------|---------|----------|---------|
| 149.047 | 0.29986 | 34.37614 | -0.00298  | 34.37614 | 0.60636 | 34.37614 | 1.20318 | 34.3761 | 1.80572 | 34.37614 | 2.40239 |
| 149.147 | 0.29826 | 34.39582 | 0.00159   | 34.39582 | 0.6015  | 34.39582 | 1.20487 | 34.3958 | 1.80136 | 34.39582 | 2.39888 |
| 149.247 | 0.29616 | 34.41552 | 0.00214   | 34.41552 | 0.60785 | 34.41552 | 1.20764 | 34.4155 | 1.80163 | 34.41552 | 2.40416 |
| 149.347 | 0.29546 | 34.4352  | 2.85E-04  | 34.4352  | 0.60269 | 34.4352  | 1.20385 | 34.4352 | 1.80265 | 34.4352  | 2.39817 |
| 149.447 | 0.29379 | 34.4549  | 0.0031    | 34.4549  | 0.60434 | 34.4549  | 1.2057  | 34.4549 | 1.80372 | 34.4549  | 2.40291 |
| 149.547 | 0.29107 | 34.47458 | 0.00248   | 34.47458 | 0.59924 | 34.47458 | 1.2016  | 34.4746 | 1.80105 | 34.47458 | 2.40201 |
| 149.647 | 0.28903 | 34.49427 | 0.00329   | 34.49427 | 0.60666 | 34.49427 | 1.20112 | 34.4943 | 1.80588 | 34.49427 | 2.4019  |
| 149.747 | 0.28715 | 34.51396 | 6.58E-04  | 34.51396 | 0.60118 | 34.51396 | 1.20766 | 34.514  | 1.80284 | 34.51396 | 2.40306 |
| 149.847 | 0.28554 | 34.53365 | 0.00315   | 34.53365 | 0.60446 | 34.53365 | 1.2     | 34.5337 | 1.80235 | 34.53365 | 2.40368 |
| 149.947 | 0.28337 | 34.55334 | 0.00376   | 34.55334 | 0.60743 | 34.55334 | 1.20547 | 34.5533 | 1.80037 | 34.55334 | 2.40581 |
| 150.047 | 0.28177 | 34.57303 | 0.00341   | 34.57303 | 0.60546 | 34.57303 | 1.20288 | 34.573  | 1.80126 | 34.57303 | 2.39843 |
| 150.147 | 0.27988 | 34.59272 | -0.00149  | 34.59272 | 0.60337 | 34.59272 | 1.20722 | 34.5927 | 1.79922 | 34.59272 | 2.40832 |
| 150.247 | 0.27785 | 34.61241 | 8.73E-04  | 34.61241 | 0.61053 | 34.61241 | 1.202   | 34.6124 | 1.79549 | 34.61241 | 2.40675 |
| 150.347 | 0.27611 | 34.6321  | 0.00428   | 34.6321  | 0.60699 | 34.6321  | 1.19828 | 34.6321 | 1.802   | 34.6321  | 2.40143 |
| 150.447 | 0.27471 | 34.65178 | -3.63E-04 | 34.65178 | 0.60546 | 34.65178 | 1.20184 | 34.6518 | 1.79589 | 34.65178 | 2.40477 |
| 150.547 | 0.27381 | 34.67147 | 0.00297   | 34.67147 | 0.60349 | 34.67147 | 1.20504 | 34.6715 | 1.80235 | 34.67147 | 2.40769 |
| 150.647 | 0.27251 | 34.69116 | 0.00411   | 34.69116 | 0.60534 | 34.69116 | 1.20617 | 34.6912 | 1.80143 | 34.69116 | 2.40316 |
| 150.747 | 0.27059 | 34.71085 | 0.00116   | 34.71085 | 0.6018  | 34.71085 | 1.20513 | 34.7109 | 1.79894 | 34.71085 | 2.40565 |
| 150.847 | 0.26955 | 34.73054 | 0.00702   | 34.73054 | 0.60333 | 34.73054 | 1.20601 | 34.7305 | 1.80296 | 34.73054 | 2.40385 |
| 150.947 | 0.26767 | 34.75023 | 0.00491   | 34.75023 | 0.61019 | 34.75023 | 1.20399 | 34.7502 | 1.80254 | 34.75023 | 2.40398 |
| 151.047 | 0.2659  | 34.76992 | 0.0032    | 34.76992 | 0.60741 | 34.76992 | 1.20285 | 34.7699 | 1.79624 | 34.76992 | 2.4029  |
| 151.147 | 0.26415 | 34.78961 | 0.00868   | 34.78961 | 0.61207 | 34.78961 | 1.20042 | 34.7896 | 1.80101 | 34.78961 | 2.40261 |
| 151.247 | 0.2624  | 34.8093  | 0.00417   | 34.8093  | 0.61229 | 34.8093  | 1.20537 | 34.8093 | 1.80265 | 34.8093  | 2.40474 |
| 151.347 | 0.26092 | 34.82899 | 0.00226   | 34.82899 | 0.61195 | 34.82899 | 1.20811 | 34.829  | 1.80011 | 34.82899 | 2.3979  |
| 151.447 | 0.26007 | 34.84867 | 0.00501   | 34.84867 | 0.61211 | 34.84867 | 1.20826 | 34.8487 | 1.80219 | 34.84867 | 2.4021  |
| 151.547 | 0.25844 | 34.86837 | 0.00868   | 34.86837 | 0.61333 | 34.86837 | 1.20712 | 34.8684 | 1.8012  | 34.86837 | 2.39798 |
| 151.647 | 0.2571  | 34.88805 | 0.0054    | 34.88805 | 0.6148  | 34.88805 | 1.2068  | 34.8881 | 1.80509 | 34.88805 | 2.40569 |
| 151.747 | 0.25554 | 34.90774 | 0.00667   | 34.90774 | 0.61246 | 34.90774 | 1.20618 | 34.9077 | 1.80705 | 34.90774 | 2.40395 |
| 151.847 | 0.2541  | 34.92743 | 0.00968   | 34.92743 | 0.6123  | 34.92743 | 1.20432 | 34.9274 | 1.80688 | 34.92743 | 2.40523 |
| 151.947 | 0.25244 | 34.94712 | 0.01361   | 34.94712 | 0.61234 | 34.94712 | 1.20251 | 34.9471 | 1.80065 | 34.94712 | 2.40397 |
| 152.047 | 0.25113 | 34.96681 | 0.01163   | 34.96681 | 0.61313 | 34.96681 | 1.20493 | 34.9668 | 1.8026  | 34.96681 | 2.40743 |
| 152.147 | 0.24974 | 34.9865  | 0.01997   | 34.9865  | 0.61679 | 34.9865  | 1.2055  | 34.9865 | 1.80087 | 34.9865  | 2.40787 |
| 152.247 | 0.24845 | 35.00619 | 0.01372   | 35.00619 | 0.61144 | 35.00619 | 1.20896 | 35.0062 | 1.7987  | 35.00619 | 2.40509 |
| 152.347 | 0.24719 | 35.02588 | 0.01155   | 35.02588 | 0.61154 | 35.02588 | 1.20885 | 35.0259 | 1.80153 | 35.02588 | 2.40735 |
| 152.447 | 0.24668 | 35.04557 | 0.01074   | 35.04557 | 0.60989 | 35.04557 | 1.20859 | 35.0456 | 1.80998 | 35.04557 | 2.4053  |
| 152.547 | 0.2451  | 35.06525 | 0.01667   | 35.06525 | 0.60924 | 35.06525 | 1.20688 | 35.0653 | 1.80738 | 35.06525 | 2.40482 |
| 152.647 | 0.24332 | 35.08495 | 0.01671   | 35.08495 | 0.60921 | 35.08495 | 1.20946 | 35.085  | 1.80264 | 35.08495 | 2.40447 |
| 152.747 | 0.24247 | 35.10463 | 0.01363   | 35.10463 | 0.61006 | 35.10463 | 1.20501 | 35.1046 | 1.80641 | 35.10463 | 2.40624 |
| 152.847 | 0.24192 | 35.12432 | 0.01801   | 35.12432 | 0.60728 | 35.12432 | 1.20465 | 35.1243 | 1.80586 | 35.12432 | 2.40698 |
| 152.947 | 0.23958 | 35.14401 | 0.01364   | 35.14401 | 0.60925 | 35.14401 | 1.20615 | 35.144  | 1.80619 | 35.14401 | 2.40469 |
| 153.047 | 0.23869 | 35.1637  | 0.01685   | 35.1637  | 0.60998 | 35.1637  | 1.21198 | 35.1637 | 1.80652 | 35.1637  | 2.41137 |
| 153.147 | 0.23739 | 35.18339 | 0.01877   | 35.18339 | 0.60952 | 35.18339 | 1.20924 | 35.1834 | 1.80667 | 35.18339 | 2.40544 |
| 153.247 | 0.23553 | 35.20308 | 0.01641   | 35.20308 | 0.61012 | 35.20308 | 1.21156 | 35.2031 | 1.80937 | 35.20308 | 2.40654 |
| 153.347 | 0.23439 | 35.22277 | 0.01457   | 35.22277 | 0.60715 | 35.22277 | 1.20531 | 35.2228 | 1.80289 | 35.22277 | 2.40558 |

|         |         |          |         |          |         |          |         |         |         |          |         |
|---------|---------|----------|---------|----------|---------|----------|---------|---------|---------|----------|---------|
| 153.447 | 0.23341 | 35.24246 | 0.01454 | 35.24246 | 0.60844 | 35.24246 | 1.20655 | 35.2425 | 1.80653 | 35.24246 | 2.40772 |
| 153.547 | 0.23243 | 35.26215 | 0.01957 | 35.26215 | 0.60936 | 35.26215 | 1.2037  | 35.2622 | 1.80299 | 35.26215 | 2.40652 |
| 153.647 | 0.23157 | 35.28184 | 0.01364 | 35.28184 | 0.61033 | 35.28184 | 1.2067  | 35.2818 | 1.80544 | 35.28184 | 2.41065 |
| 153.747 | 0.23054 | 35.30153 | 0.01452 | 35.30153 | 0.60618 | 35.30153 | 1.20592 | 35.3015 | 1.80565 | 35.30153 | 2.40872 |
| 153.847 | 0.22913 | 35.32121 | 0.01728 | 35.32121 | 0.60953 | 35.32121 | 1.20664 | 35.3212 | 1.80498 | 35.32121 | 2.41001 |
| 153.947 | 0.22845 | 35.3409  | 0.01434 | 35.3409  | 0.61264 | 35.3409  | 1.20488 | 35.3409 | 1.80044 | 35.3409  | 2.4065  |
| 154.047 | 0.22742 | 35.36059 | 0.01315 | 35.36059 | 0.61024 | 35.36059 | 1.20793 | 35.3606 | 1.80333 | 35.36059 | 2.40888 |
| 154.147 | 0.22621 | 35.38028 | 0.00943 | 35.38028 | 0.61178 | 35.38028 | 1.20927 | 35.3803 | 1.80753 | 35.38028 | 2.4075  |
| 154.247 | 0.22498 | 35.39997 | 0.01343 | 35.39997 | 0.60844 | 35.39997 | 1.20689 | 35.4    | 1.80293 | 35.39997 | 2.40757 |
| 154.347 | 0.22358 | 35.41966 | 0.00886 | 35.41966 | 0.61843 | 35.41966 | 1.20565 | 35.4197 | 1.80201 | 35.41966 | 2.40485 |
| 154.447 | 0.22233 | 35.43935 | 0.01273 | 35.43935 | 0.6072  | 35.43935 | 1.20627 | 35.4394 | 1.80184 | 35.43935 | 2.4082  |
| 154.547 | 0.22129 | 35.45904 | 0.01309 | 35.45904 | 0.60781 | 35.45904 | 1.20802 | 35.459  | 1.79761 | 35.45904 | 2.40791 |
| 154.647 | 0.2201  | 35.47873 | 0.00684 | 35.47873 | 0.60916 | 35.47873 | 1.20673 | 35.4787 | 1.80694 | 35.47873 | 2.40816 |
| 154.747 | 0.21856 | 35.49842 | 0.0076  | 35.49842 | 0.6087  | 35.49842 | 1.20647 | 35.4984 | 1.80389 | 35.49842 | 2.41175 |
| 154.847 | 0.21857 | 35.5181  | 0.00744 | 35.5181  | 0.6088  | 35.5181  | 1.20517 | 35.5181 | 1.8041  | 35.5181  | 2.41007 |
| 154.947 | 0.21774 | 35.53779 | 0.00826 | 35.53779 | 0.60991 | 35.53779 | 1.20559 | 35.5378 | 1.80424 | 35.53779 | 2.40117 |
| 155.047 | 0.21662 | 35.55748 | 0.00603 | 35.55748 | 0.61264 | 35.55748 | 1.20548 | 35.5575 | 1.80132 | 35.55748 | 2.40645 |
| 155.147 | 0.21579 | 35.57717 | 0.00582 | 35.57717 | 0.60724 | 35.57717 | 1.20398 | 35.5772 | 1.80247 | 35.57717 | 2.40168 |
| 155.247 | 0.21439 | 35.59686 | 0.00541 | 35.59686 | 0.60703 | 35.59686 | 1.20439 | 35.5969 | 1.80555 | 35.59686 | 2.40588 |
| 155.347 | 0.21327 | 35.61655 | 0.00623 | 35.61655 | 0.60895 | 35.61655 | 1.2077  | 35.6166 | 1.80344 | 35.61655 | 2.40577 |
| 155.447 | 0.21243 | 35.63624 | 0.00685 | 35.63624 | 0.61156 | 35.63624 | 1.21095 | 35.6362 | 1.80271 | 35.63624 | 2.40748 |
| 155.547 | 0.21145 | 35.65593 | 0.0104  | 35.65593 | 0.60884 | 35.65593 | 1.20486 | 35.6559 | 1.8026  | 35.65593 | 2.40652 |
| 155.647 | 0.21104 | 35.67562 | 0.00973 | 35.67562 | 0.60789 | 35.67562 | 1.20785 | 35.6756 | 1.80868 | 35.67562 | 2.4032  |
| 155.747 | 0.2095  | 35.69531 | 0.0064  | 35.69531 | 0.60905 | 35.69531 | 1.2063  | 35.6953 | 1.80176 | 35.69531 | 2.40812 |
| 155.847 | 0.20957 | 35.715   | 0.00689 | 35.715   | 0.61266 | 35.715   | 1.21027 | 35.715  | 1.80072 | 35.715   | 2.40177 |
| 155.947 | 0.20845 | 35.73468 | 0.00234 | 35.73468 | 0.60582 | 35.73468 | 1.20728 | 35.7347 | 1.80642 | 35.73468 | 2.40766 |
| 156.047 | 0.20783 | 35.75438 | 0.00653 | 35.75438 | 0.60643 | 35.75438 | 1.20846 | 35.7544 | 1.79988 | 35.75438 | 2.4084  |
| 156.147 | 0.20748 | 35.77406 | 0.00606 | 35.77406 | 0.60672 | 35.77406 | 1.20846 | 35.7741 | 1.80353 | 35.77406 | 2.40345 |
| 156.247 | 0.20572 | 35.79375 | 0.0074  | 35.79375 | 0.60658 | 35.79375 | 1.208   | 35.7938 | 1.80361 | 35.79375 | 2.40522 |
| 156.347 | 0.20495 | 35.81344 | 0.00991 | 35.81344 | 0.60737 | 35.81344 | 1.20789 | 35.8134 | 1.80413 | 35.81344 | 2.40784 |
| 156.447 | 0.20419 | 35.83313 | 0.00451 | 35.83313 | 0.60923 | 35.83313 | 1.20433 | 35.8331 | 1.80121 | 35.83313 | 2.40591 |
| 156.547 | 0.2037  | 35.85282 | 0.00741 | 35.85282 | 0.61209 | 35.85282 | 1.20614 | 35.8528 | 1.80773 | 35.85282 | 2.40459 |
| 156.647 | 0.20328 | 35.87251 | 0.00706 | 35.87251 | 0.61057 | 35.87251 | 1.20882 | 35.8725 | 1.80556 | 35.87251 | 2.40806 |
| 156.747 | 0.20245 | 35.8922  | 0.00659 | 35.8922  | 0.61105 | 35.8922  | 1.20836 | 35.8922 | 1.80408 | 35.8922  | 2.40583 |
| 156.847 | 0.20162 | 35.91189 | 0.00605 | 35.91189 | 0.61222 | 35.91189 | 1.20949 | 35.9119 | 1.80766 | 35.91189 | 2.40178 |
| 156.947 | 0.20119 | 35.93158 | 0.00577 | 35.93158 | 0.61214 | 35.93158 | 1.21042 | 35.9316 | 1.8083  | 35.93158 | 2.40289 |
| 157.047 | 0.20026 | 35.95126 | 0.00919 | 35.95126 | 0.60956 | 35.95126 | 1.21151 | 35.9513 | 1.80932 | 35.95126 | 2.40963 |
| 157.147 | 0.19964 | 35.97095 | 0.01443 | 35.97095 | 0.61092 | 35.97095 | 1.21264 | 35.971  | 1.80828 | 35.97095 | 2.40261 |
| 157.247 | 0.19889 | 35.99064 | 0.0126  | 35.99064 | 0.61146 | 35.99064 | 1.20732 | 35.9906 | 1.80667 | 35.99064 | 2.41141 |
| 157.347 | 0.19847 | 36.01033 | 0.01141 | 36.01033 | 0.61076 | 36.01033 | 1.20691 | 36.0103 | 1.80419 | 36.01033 | 2.40973 |
| 157.447 | 0.19792 | 36.03002 | 0.00938 | 36.03002 | 0.61093 | 36.03002 | 1.20799 | 36.03   | 1.81096 | 36.03002 | 2.4038  |
| 157.547 | 0.1974  | 36.04971 | 0.0093  | 36.04971 | 0.61748 | 36.04971 | 1.20737 | 36.0497 | 1.80636 | 36.04971 | 2.41127 |
| 157.647 | 0.19707 | 36.0694  | 0.01013 | 36.0694  | 0.61196 | 36.0694  | 1.20753 | 36.0694 | 1.80913 | 36.0694  | 2.40814 |
| 157.747 | 0.19622 | 36.08909 | 0.00881 | 36.08909 | 0.61613 | 36.08909 | 1.2098  | 36.0891 | 1.80827 | 36.08909 | 2.40785 |

|         |         |          |           |          |         |          |         |         |         |          |         |
|---------|---------|----------|-----------|----------|---------|----------|---------|---------|---------|----------|---------|
| 157.847 | 0.19574 | 36.10878 | 0.00718   | 36.10878 | 0.61367 | 36.10878 | 1.20944 | 36.1088 | 1.80898 | 36.10878 | 2.41016 |
| 157.947 | 0.19579 | 36.12847 | 0.00787   | 36.12847 | 0.61629 | 36.12847 | 1.20954 | 36.1285 | 1.80869 | 36.12847 | 2.4069  |
| 158.047 | 0.19548 | 36.14816 | 0.00799   | 36.14816 | 0.61277 | 36.14816 | 1.20887 | 36.1482 | 1.80702 | 36.14816 | 2.41007 |
| 158.147 | 0.19528 | 36.16785 | 0.00856   | 36.16785 | 0.61375 | 36.16785 | 1.20707 | 36.1679 | 1.8061  | 36.16785 | 2.40621 |
| 158.247 | 0.19516 | 36.18753 | 0.00854   | 36.18753 | 0.61273 | 36.18753 | 1.21182 | 36.1875 | 1.80725 | 36.18753 | 2.4081  |
| 158.347 | 0.19448 | 36.20722 | 0.00697   | 36.20722 | 0.60909 | 36.20722 | 1.20707 | 36.2072 | 1.80683 | 36.20722 | 2.40557 |
| 158.447 | 0.19395 | 36.22691 | 0.0067    | 36.22691 | 0.61308 | 36.22691 | 1.20955 | 36.2269 | 1.80341 | 36.22691 | 2.40819 |
| 158.547 | 0.19364 | 36.2466  | 0.00163   | 36.2466  | 0.60918 | 36.2466  | 1.20356 | 36.2466 | 1.80374 | 36.2466  | 2.40439 |
| 158.647 | 0.19346 | 36.26629 | 0.00641   | 36.26629 | 0.61129 | 36.26629 | 1.21177 | 36.2663 | 1.7982  | 36.26629 | 2.40573 |
| 158.747 | 0.19327 | 36.28598 | 0.0084    | 36.28598 | 0.61028 | 36.28598 | 1.20614 | 36.286  | 1.80416 | 36.28598 | 2.40357 |
| 158.847 | 0.19284 | 36.30567 | 0.00748   | 36.30567 | 0.61032 | 36.30567 | 1.20676 | 36.3057 | 1.80205 | 36.30567 | 2.40091 |
| 158.947 | 0.19241 | 36.32536 | 0.00494   | 36.32536 | 0.60743 | 36.32536 | 1.20841 | 36.3254 | 1.80364 | 36.32536 | 2.40305 |
| 159.047 | 0.19221 | 36.34505 | 0.00778   | 36.34505 | 0.61123 | 36.34505 | 1.20991 | 36.3451 | 1.80078 | 36.34505 | 2.40391 |
| 159.147 | 0.19192 | 36.36473 | -7.76E-05 | 36.36473 | 0.61791 | 36.36473 | 1.20521 | 36.3647 | 1.80224 | 36.36473 | 2.40369 |
| 159.247 | 0.19168 | 36.38443 | 0.01191   | 36.38443 | 0.60814 | 36.38443 | 1.20899 | 36.3844 | 1.80376 | 36.38443 | 2.40194 |
| 159.347 | 0.19147 | 36.40411 | 0.01092   | 36.40411 | 0.60893 | 36.40411 | 1.20677 | 36.4041 | 1.80772 | 36.40411 | 2.40238 |
| 159.447 | 0.19077 | 36.42381 | 0.00514   | 36.42381 | 0.60767 | 36.42381 | 1.21038 | 36.4238 | 1.79999 | 36.42381 | 2.39967 |
| 159.547 | 0.19076 | 36.44349 | 7.16E-04  | 36.44349 | 0.61034 | 36.44349 | 1.20641 | 36.4435 | 1.80395 | 36.44349 | 2.40114 |
| 159.647 | 0.19024 | 36.46318 | 0.00472   | 36.46318 | 0.6047  | 36.46318 | 1.20971 | 36.4632 | 1.80309 | 36.46318 | 2.40546 |
| 159.747 | 0.19027 | 36.48287 | 0.00523   | 36.48287 | 0.60931 | 36.48287 | 1.20641 | 36.4829 | 1.79811 | 36.48287 | 2.40372 |
| 159.847 | 0.18995 | 36.50256 | 0.0058    | 36.50256 | 0.61074 | 36.50256 | 1.20631 | 36.5026 | 1.80413 | 36.50256 | 2.40088 |
| 159.947 | 0.19001 | 36.52225 | 0.01046   | 36.52225 | 0.61097 | 36.52225 | 1.20579 | 36.5223 | 1.80203 | 36.52225 | 2.39708 |
| 160.047 | 0.18994 | 36.54194 | 0.00656   | 36.54194 | 0.61302 | 36.54194 | 1.206   | 36.5419 | 1.8068  | 36.54194 | 2.40213 |
| 160.147 | 0.18943 | 36.56163 | 0.00836   | 36.56163 | 0.60894 | 36.56163 | 1.20616 | 36.5616 | 1.80213 | 36.56163 | 2.40329 |
| 160.247 | 0.18954 | 36.58132 | 0.00809   | 36.58132 | 0.60918 | 36.58132 | 1.20761 | 36.5813 | 1.8019  | 36.58132 | 2.4038  |
| 160.347 | 0.18893 | 36.60101 | 0.00912   | 36.60101 | 0.60873 | 36.60101 | 1.2073  | 36.601  | 1.80261 | 36.60101 | 2.40199 |
| 160.447 | 0.18872 | 36.62069 | 0.00295   | 36.62069 | 0.61172 | 36.62069 | 1.20534 | 36.6207 | 1.80126 | 36.62069 | 2.39886 |
| 160.547 | 0.18924 | 36.64038 | 0.0078    | 36.64038 | 0.6092  | 36.64038 | 1.20555 | 36.6404 | 1.80165 | 36.64038 | 2.40572 |
| 160.647 | 0.18888 | 36.66007 | 0.01318   | 36.66007 | 0.60743 | 36.66007 | 1.21082 | 36.6601 | 1.80111 | 36.66007 | 2.40483 |
| 160.747 | 0.18861 | 36.67976 | 0.01304   | 36.67976 | 0.61167 | 36.67976 | 1.20405 | 36.6798 | 1.80038 | 36.67976 | 2.40672 |
| 160.847 | 0.18837 | 36.69945 | 0.00816   | 36.69945 | 0.61016 | 36.69945 | 1.204   | 36.6995 | 1.8009  | 36.69945 | 2.4014  |
| 160.947 | 0.18821 | 36.71914 | 0.01594   | 36.71914 | 0.60758 | 36.71914 | 1.20478 | 36.7191 | 1.80524 | 36.71914 | 2.40469 |
| 161.047 | 0.1883  | 36.73883 | 0.01891   | 36.73883 | 0.60963 | 36.73883 | 1.20881 | 36.7388 | 1.80295 | 36.73883 | 2.40338 |
| 161.147 | 0.1881  | 36.75852 | 0.01482   | 36.75852 | 0.60743 | 36.75852 | 1.20256 | 36.7585 | 1.80116 | 36.75852 | 2.4077  |
| 161.247 | 0.18786 | 36.77821 | 0.00917   | 36.77821 | 0.6041  | 36.77821 | 1.20546 | 36.7782 | 1.80293 | 36.77821 | 2.40723 |
| 161.347 | 0.18795 | 36.7979  | 0.01085   | 36.7979  | 0.61134 | 36.7979  | 1.20422 | 36.7979 | 1.80189 | 36.7979  | 2.40688 |
| 161.447 | 0.18781 | 36.81758 | 0.0098    | 36.81758 | 0.61327 | 36.81758 | 1.20329 | 36.8176 | 1.80684 | 36.81758 | 2.40702 |
| 161.547 | 0.18779 | 36.83728 | 0.01128   | 36.83728 | 0.61463 | 36.83728 | 1.2082  | 36.8373 | 1.80499 | 36.83728 | 2.40279 |
| 161.647 | 0.18761 | 36.85696 | 0.01147   | 36.85696 | 0.60924 | 36.85696 | 1.20733 | 36.857  | 1.80301 | 36.85696 | 2.41172 |
| 161.747 | 0.18775 | 36.87665 | 0.0088    | 36.87665 | 0.61185 | 36.87665 | 1.20666 | 36.8767 | 1.80328 | 36.87665 | 2.40155 |
| 161.847 | 0.18767 | 36.89634 | 0.00931   | 36.89634 | 0.6084  | 36.89634 | 1.20248 | 36.8963 | 1.80312 | 36.89634 | 2.40823 |
| 161.947 | 0.18763 | 36.91603 | 0.01002   | 36.91603 | 0.61039 | 36.91603 | 1.20573 | 36.916  | 1.80339 | 36.91603 | 2.40601 |
| 162.047 | 0.18759 | 36.93572 | 0.00826   | 36.93572 | 0.60706 | 36.93572 | 1.20351 | 36.9357 | 1.80322 | 36.93572 | 2.40809 |
| 162.147 | 0.18734 | 36.95541 | 0.01189   | 36.95541 | 0.61311 | 36.95541 | 1.20259 | 36.9554 | 1.80018 | 36.95541 | 2.40531 |

|         |         |          |          |          |         |          |         |         |         |          |         |
|---------|---------|----------|----------|----------|---------|----------|---------|---------|---------|----------|---------|
| 162.247 | 0.1877  | 36.9751  | 0.00708  | 36.9751  | 0.60941 | 36.9751  | 1.20755 | 36.9751 | 1.80402 | 36.9751  | 2.40685 |
| 162.347 | 0.18739 | 36.99479 | 0.00708  | 36.99479 | 0.60533 | 36.99479 | 1.20512 | 36.9948 | 1.80085 | 36.99479 | 2.40705 |
| 162.447 | 0.18754 | 37.01448 | 0.00778  | 37.01448 | 0.60907 | 37.01448 | 1.20229 | 37.0145 | 1.80837 | 37.01448 | 2.40725 |
| 162.547 | 0.18768 | 37.03416 | 0.0044   | 37.03416 | 0.60762 | 37.03416 | 1.20167 | 37.0342 | 1.80702 | 37.03416 | 2.4052  |
| 162.647 | 0.18762 | 37.05386 | 0.00466  | 37.05386 | 0.60423 | 37.05386 | 1.20389 | 37.0539 | 1.80267 | 37.05386 | 2.40364 |
| 162.747 | 0.18766 | 37.07354 | 0.00439  | 37.07354 | 0.6064  | 37.07354 | 1.20348 | 37.0735 | 1.80132 | 37.07354 | 2.40117 |
| 162.847 | 0.18725 | 37.09323 | 0.00186  | 37.09323 | 0.60533 | 37.09323 | 1.20648 | 37.0932 | 1.80259 | 37.09323 | 2.40313 |
| 162.947 | 0.1872  | 37.11292 | 0.00153  | 37.11292 | 0.60412 | 37.11292 | 1.19765 | 37.1129 | 1.80161 | 37.11292 | 2.40575 |
| 163.047 | 0.1878  | 37.13261 | 0.00133  | 37.13261 | 0.60104 | 37.13261 | 1.20168 | 37.1326 | 1.80276 | 37.13261 | 2.40401 |
| 163.147 | 0.18778 | 37.1523  | 0.0058   | 37.1523  | 0.60791 | 37.1523  | 1.20107 | 37.1523 | 1.8049  | 37.1523  | 2.40482 |
| 163.247 | 0.18789 | 37.17199 | 0.00255  | 37.17199 | 0.61059 | 37.17199 | 1.202   | 37.172  | 1.80611 | 37.17199 | 2.40199 |
| 163.347 | 0.18764 | 37.19168 | 1.65E-05 | 37.19168 | 0.60313 | 37.19168 | 1.20216 | 37.1917 | 1.80195 | 37.19168 | 2.40298 |
| 163.447 | 0.18737 | 37.21137 | 7.66E-05 | 37.21137 | 0.6065  | 37.21137 | 1.19834 | 37.2114 | 1.8016  | 37.21137 | 2.4053  |
| 163.547 | 0.18734 | 37.23106 | 0.00124  | 37.23106 | 0.60792 | 37.23106 | 1.19994 | 37.2311 | 1.80224 | 37.23106 | 2.40701 |
| 163.647 | 0.18768 | 37.25075 | -0.0035  | 37.25075 | 0.60447 | 37.25075 | 1.20134 | 37.2508 | 1.80295 | 37.25075 | 2.40351 |
| 163.747 | 0.18717 | 37.27044 | 0.00168  | 37.27044 | 0.60489 | 37.27044 | 1.20072 | 37.2704 | 1.80491 | 37.27044 | 2.40523 |
| 163.847 | 0.18729 | 37.29012 | 0.00155  | 37.29012 | 0.6     | 37.29012 | 1.20326 | 37.2901 | 1.80168 | 37.29012 | 2.40773 |
| 163.947 | 0.18739 | 37.30981 | 0.00466  | 37.30981 | 0.60291 | 37.30981 | 1.19975 | 37.3098 | 1.80371 | 37.30981 | 2.40332 |
| 164.047 | 0.18755 | 37.3295  | 0.00102  | 37.3295  | 0.60583 | 37.3295  | 1.20084 | 37.3295 | 1.80935 | 37.3295  | 2.40467 |
| 164.147 | 0.18767 | 37.34919 | 0.00134  | 37.34919 | 0.60348 | 37.34919 | 1.19939 | 37.3492 | 1.80469 | 37.34919 | 2.41039 |
| 164.247 | 0.18781 | 37.36888 | 0.0029   | 37.36888 | 0.60126 | 37.36888 | 1.2042  | 37.3689 | 1.8054  | 37.36888 | 2.40822 |
| 164.347 | 0.18779 | 37.38857 | 0.00458  | 37.38857 | 0.60443 | 37.38857 | 1.19987 | 37.3886 | 1.80361 | 37.38857 | 2.40254 |
| 164.447 | 0.18781 | 37.40826 | 0.00549  | 37.40826 | 0.60528 | 37.40826 | 1.2008  | 37.4083 | 1.80095 | 37.40826 | 2.40838 |
| 164.547 | 0.18794 | 37.42795 | 0.00386  | 37.42795 | 0.60844 | 37.42795 | 1.20137 | 37.428  | 1.80484 | 37.42795 | 2.40313 |
| 164.647 | 0.18804 | 37.44764 | 0.00334  | 37.44764 | 0.60697 | 37.44764 | 1.2006  | 37.4476 | 1.80368 | 37.44764 | 2.4029  |
| 164.747 | 0.18801 | 37.46733 | 0.00308  | 37.46733 | 0.60882 | 37.46733 | 1.20034 | 37.4673 | 1.80508 | 37.46733 | 2.40656 |
| 164.847 | 0.18767 | 37.48701 | 0.00469  | 37.48701 | 0.60704 | 37.48701 | 1.20608 | 37.487  | 1.80616 | 37.48701 | 2.40482 |
| 164.947 | 0.18761 | 37.5067  | 0.00197  | 37.5067  | 0.60038 | 37.5067  | 1.20402 | 37.5067 | 1.79856 | 37.5067  | 2.4038  |
| 165.047 | 0.18773 | 37.52639 | 0.00702  | 37.52639 | 0.60673 | 37.52639 | 1.19849 | 37.5264 | 1.80496 | 37.52639 | 2.40109 |
| 165.147 | 0.18804 | 37.54608 | 0.00598  | 37.54608 | 0.60295 | 37.54608 | 1.19726 | 37.5461 | 1.80273 | 37.54608 | 2.40457 |
| 165.247 | 0.18807 | 37.56577 | 0.00475  | 37.56577 | 0.60593 | 37.56577 | 1.20077 | 37.5658 | 1.80269 | 37.56577 | 2.40634 |
| 165.347 | 0.18795 | 37.58546 | -0.00128 | 37.58546 | 0.60258 | 37.58546 | 1.19969 | 37.5855 | 1.80553 | 37.58546 | 2.40588 |
| 165.447 | 0.18809 | 37.60515 | 0.00611  | 37.60515 | 0.60212 | 37.60515 | 1.20057 | 37.6052 | 1.80167 | 37.60515 | 2.40056 |
| 165.547 | 0.188   | 37.62484 | 0.0052   | 37.62484 | 0.60603 | 37.62484 | 1.19815 | 37.6248 | 1.80895 | 37.62484 | 2.39961 |
| 165.647 | 0.18816 | 37.64453 | 0.00124  | 37.64453 | 0.606   | 37.64453 | 1.19888 | 37.6445 | 1.80091 | 37.64453 | 2.40175 |
| 165.747 | 0.18869 | 37.66422 | 0.00111  | 37.66422 | 0.60672 | 37.66422 | 1.19965 | 37.6642 | 1.80393 | 37.66422 | 2.40165 |
| 165.847 | 0.18881 | 37.68391 | 0.00182  | 37.68391 | 0.60288 | 37.68391 | 1.20219 | 37.6839 | 1.8037  | 37.68391 | 2.40415 |
| 165.947 | 0.18885 | 37.70359 | -0.0022  | 37.70359 | 0.60247 | 37.70359 | 1.2024  | 37.7036 | 1.80316 | 37.70359 | 2.40399 |
| 166.047 | 0.189   | 37.72329 | 3.26E-04 | 37.72329 | 0.60445 | 37.72329 | 1.2007  | 37.7233 | 1.80219 | 37.72329 | 2.40534 |
| 166.147 | 0.18929 | 37.74297 | 0.00227  | 37.74297 | 0.60248 | 37.74297 | 1.19734 | 37.743  | 1.80446 | 37.74297 | 2.39851 |
| 166.247 | 0.18938 | 37.76266 | 0.0059   | 37.76266 | 0.60364 | 37.76266 | 1.20117 | 37.7627 | 1.80192 | 37.76266 | 2.40156 |
| 166.347 | 0.18949 | 37.78235 | 0.00804  | 37.78235 | 0.60505 | 37.78235 | 1.20122 | 37.7824 | 1.80132 | 37.78235 | 2.39733 |
| 166.447 | 0.1897  | 37.80204 | 0.00311  | 37.80204 | 0.60346 | 37.80204 | 1.2005  | 37.802  | 1.80178 | 37.80204 | 2.4065  |
| 166.547 | 0.19014 | 37.82173 | 0.00304  | 37.82173 | 0.60687 | 37.82173 | 1.20448 | 37.8217 | 1.80368 | 37.82173 | 2.40507 |



|         |         |          |          |          |         |          |         |         |         |          |         |
|---------|---------|----------|----------|----------|---------|----------|---------|---------|---------|----------|---------|
| 166.647 | 0.19022 | 37.84142 | 0.00207  | 37.84142 | 0.6009  | 37.84142 | 1.19979 | 37.8414 | 1.79989 | 37.84142 | 2.40193 |
| 166.747 | 0.19045 | 37.86111 | 0.00265  | 37.86111 | 0.60288 | 37.86111 | 1.2018  | 37.8611 | 1.80529 | 37.86111 | 2.40547 |
| 166.847 | 0.19079 | 37.8808  | 0.00311  | 37.8808  | 0.60848 | 37.8808  | 1.2     | 37.8808 | 1.80556 | 37.8808  | 2.40646 |
| 166.947 | 0.19091 | 37.90049 | 0.00576  | 37.90049 | 0.60463 | 37.90049 | 1.19535 | 37.9005 | 1.80096 | 37.90049 | 2.40775 |
| 167.047 | 0.19109 | 37.92017 | 0.00375  | 37.92017 | 0.60285 | 37.92017 | 1.2032  | 37.9202 | 1.80686 | 37.92017 | 2.41134 |
| 167.147 | 0.19152 | 37.93987 | 0.01115  | 37.93987 | 0.60533 | 37.93987 | 1.20216 | 37.9399 | 1.8025  | 37.93987 | 2.40239 |
| 167.247 | 0.19173 | 37.95955 | 0.00596  | 37.95955 | 0.60486 | 37.95955 | 1.20861 | 37.9596 | 1.80109 | 37.95955 | 2.40774 |
| 167.347 | 0.19197 | 37.97924 | 8.99E-04 | 37.97924 | 0.60233 | 37.97924 | 1.20453 | 37.9792 | 1.80099 | 37.97924 | 2.40231 |
| 167.447 | 0.19224 | 37.99893 | 0.00609  | 37.99893 | 0.60055 | 37.99893 | 1.19854 | 37.9989 | 1.80545 | 37.99893 | 2.40166 |
| 167.547 | 0.19231 | 38.01862 | 0.00369  | 38.01862 | 0.60403 | 38.01862 | 1.20091 | 38.0186 | 1.80379 | 38.01862 | 2.40307 |
| 167.647 | 0.19262 | 38.03831 | 0.00187  | 38.03831 | 0.60306 | 38.03831 | 1.20117 | 38.0383 | 1.80125 | 38.03831 | 2.40551 |
| 167.747 | 0.19292 | 38.058   | 0.00446  | 38.058   | 0.60272 | 38.058   | 1.20318 | 38.058  | 1.79871 | 38.058   | 2.40578 |
| 167.847 | 0.19279 | 38.07769 | 0.01192  | 38.07769 | 0.60382 | 38.07769 | 1.2025  | 38.0777 | 1.80398 | 38.07769 | 2.40464 |
| 167.947 | 0.19324 | 38.09738 | 0.00647  | 38.09738 | 0.60391 | 38.09738 | 1.20199 | 38.0974 | 1.79969 | 38.09738 | 2.40745 |
| 168.047 | 0.19338 | 38.11707 | 0.00271  | 38.11707 | 0.59907 | 38.11707 | 1.20105 | 38.1171 | 1.8049  | 38.11707 | 2.4051  |
| 168.147 | 0.19332 | 38.13676 | 0.0057   | 38.13676 | 0.59773 | 38.13676 | 1.20312 | 38.1368 | 1.80124 | 38.13676 | 2.40785 |
| 168.247 | 0.1934  | 38.15644 | 0.01043  | 38.15644 | 0.60395 | 38.15644 | 1.19821 | 38.1564 | 1.80189 | 38.15644 | 2.40781 |
| 168.347 | 0.19355 | 38.17613 | 0.00771  | 38.17613 | 0.60067 | 38.17613 | 1.19836 | 38.1761 | 1.80303 | 38.17613 | 2.40322 |
| 168.447 | 0.19399 | 38.19582 | 0.00505  | 38.19582 | 0.60046 | 38.19582 | 1.20373 | 38.1958 | 1.80406 | 38.19582 | 2.40967 |
| 168.547 | 0.19414 | 38.21551 | 5.75E-04 | 38.21551 | 0.60844 | 38.21551 | 1.20156 | 38.2155 | 1.80708 | 38.21551 | 2.4032  |
| 168.647 | 0.19409 | 38.2352  | 0.01004  | 38.2352  | 0.59996 | 38.2352  | 1.19861 | 38.2352 | 1.81085 | 38.2352  | 2.40013 |
| 168.747 | 0.19425 | 38.25489 | 0.00725  | 38.25489 | 0.60194 | 38.25489 | 1.19938 | 38.2549 | 1.80875 | 38.25489 | 2.40124 |
| 168.847 | 0.19407 | 38.27458 | 0.00628  | 38.27458 | 0.6031  | 38.27458 | 1.20217 | 38.2746 | 1.80584 | 38.27458 | 2.40423 |
| 168.947 | 0.19412 | 38.29427 | 0.00952  | 38.29427 | 0.60119 | 38.29427 | 1.1984  | 38.2943 | 1.80261 | 38.29427 | 2.40855 |
| 169.047 | 0.19443 | 38.31396 | 0.00362  | 38.31396 | 0.60148 | 38.31396 | 1.20247 | 38.314  | 1.80339 | 38.31396 | 2.4059  |
| 169.147 | 0.19442 | 38.33364 | 0.00369  | 38.33364 | 0.60095 | 38.33364 | 1.20108 | 38.3336 | 1.80435 | 38.33364 | 2.40234 |
| 169.247 | 0.19423 | 38.35334 | 0.00395  | 38.35334 | 0.60874 | 38.35334 | 1.20376 | 38.3533 | 1.79894 | 38.35334 | 2.40115 |
| 169.347 | 0.19464 | 38.37302 | 0.00972  | 38.37302 | 0.60327 | 38.37302 | 1.20076 | 38.373  | 1.80571 | 38.37302 | 2.40905 |
| 169.447 | 0.19448 | 38.39272 | 0.0044   | 38.39272 | 0.60524 | 38.39272 | 1.19745 | 38.3927 | 1.79942 | 38.39272 | 2.40434 |
| 169.547 | 0.19428 | 38.4124  | 0.00408  | 38.4124  | 0.60378 | 38.4124  | 1.20437 | 38.4124 | 1.80126 | 38.4124  | 2.40509 |
| 169.647 | 0.1944  | 38.43209 | 0.00285  | 38.43209 | 0.60394 | 38.43209 | 1.2039  | 38.4321 | 1.80509 | 38.43209 | 2.40468 |
| 169.747 | 0.19459 | 38.45178 | 0.00804  | 38.45178 | 0.60303 | 38.45178 | 1.1992  | 38.4518 | 1.8048  | 38.45178 | 2.40367 |
| 169.847 | 0.1941  | 38.47147 | 0.00544  | 38.47147 | 0.60501 | 38.47147 | 1.20209 | 38.4715 | 1.8042  | 38.47147 | 2.40102 |
| 169.947 | 0.19404 | 38.49116 | 0.01057  | 38.49116 | 0.59803 | 38.49116 | 1.20467 | 38.4912 | 1.80016 | 38.49116 | 2.40147 |
| 170.047 | 0.1941  | 38.51085 | 0.00992  | 38.51085 | 0.60351 | 38.51085 | 1.20353 | 38.5109 | 1.80106 | 38.51085 | 2.40367 |
| 170.147 | 0.1941  | 38.53054 | 0.00564  | 38.53054 | 0.60179 | 38.53054 | 1.20146 | 38.5305 | 1.80008 | 38.53054 | 2.40799 |
| 170.247 | 0.19442 | 38.55023 | 0.00214  | 38.55023 | 0.60514 | 38.55023 | 1.20265 | 38.5502 | 1.80267 | 38.55023 | 2.40734 |
| 170.347 | 0.19438 | 38.56992 | 0.00454  | 38.56992 | 0.60242 | 38.56992 | 1.19759 | 38.5699 | 1.80401 | 38.56992 | 2.40409 |
| 170.447 | 0.19394 | 38.5896  | 0.00227  | 38.5896  | 0.60064 | 38.5896  | 1.20481 | 38.5896 | 1.80253 | 38.5896  | 2.40029 |
| 170.547 | 0.1937  | 38.60929 | 0.00571  | 38.60929 | 0.60162 | 38.60929 | 1.19867 | 38.6093 | 1.80505 | 38.60929 | 2.4051  |
| 170.647 | 0.19365 | 38.62898 | 0.00298  | 38.62898 | 0.60735 | 38.62898 | 1.1982  | 38.629  | 1.80751 | 38.62898 | 2.39839 |
| 170.747 | 0.19346 | 38.64867 | 0.00447  | 38.64867 | 0.60112 | 38.64867 | 1.20062 | 38.6487 | 1.80454 | 38.64867 | 2.39707 |
| 170.847 | 0.19324 | 38.66836 | 0        | 38.66836 | 0.60097 | 38.66836 | 1.2     | 38.6684 | 1.8     | 38.66836 | 2.4     |
| 170.947 | 0.19337 | 38.68805 | 0.00515  | 38.68805 | 0.60313 | 38.68805 | 1.19715 | 38.6881 | 1.80235 | 38.68805 | 2.40159 |

|         |         |          |         |          |         |          |         |         |         |          |         |
|---------|---------|----------|---------|----------|---------|----------|---------|---------|---------|----------|---------|
| 171.047 | 0.19326 | 38.70774 | 0.01049 | 38.70774 | 0.60104 | 38.70774 | 1.20008 | 38.7077 | 1.79957 | 38.70774 | 2.40772 |
| 171.147 | 0.19305 | 38.72743 | 0.00578 | 38.72743 | 0.60064 | 38.72743 | 1.19898 | 38.7274 | 1.79985 | 38.72743 | 2.40106 |
| 171.247 | 0.19291 | 38.74712 | 0.00218 | 38.74712 | 0.60586 | 38.74712 | 1.20129 | 38.7471 | 1.80457 | 38.74712 | 2.40713 |
| 171.347 | 0.19263 | 38.76681 | 0.00441 | 38.76681 | 0.60283 | 38.76681 | 1.20092 | 38.7668 | 1.80441 | 38.76681 | 2.40696 |
| 171.447 | 0.19285 | 38.7865  | 0.00547 | 38.7865  | 0.60255 | 38.7865  | 1.19791 | 38.7865 | 1.8002  | 38.7865  | 2.40285 |
| 171.547 | 0.19273 | 38.80618 | 0.00374 | 38.80618 | 0.5999  | 38.80618 | 1.20338 | 38.8062 | 1.80654 | 38.80618 | 2.40395 |
| 171.647 | 0.19275 | 38.82587 | 0.00513 | 38.82587 | 0.603   | 38.82587 | 1.20089 | 38.8259 | 1.79826 | 38.82587 | 2.40353 |
| 171.747 | 0.19288 | 38.84556 | 0.00165 | 38.84556 | 0.60904 | 38.84556 | 1.20345 | 38.8456 | 1.80323 | 38.84556 | 2.40373 |
| 171.847 | 0.19233 | 38.86525 | 0.00421 | 38.86525 | 0.6     | 38.86525 | 1.2005  | 38.8653 | 1.80295 | 38.86525 | 2.40034 |
| 171.947 | 0.19232 | 38.88494 | 0.00158 | 38.88494 | 0.59907 | 38.88494 | 1.201   | 38.8849 | 1.7998  | 38.88494 | 2.40417 |
| 172.047 | 0.19196 | 38.90463 | 0.00478 | 38.90463 | 0.60076 | 38.90463 | 1.1996  | 38.9046 | 1.80033 | 38.90463 | 2.40612 |
| 172.147 | 0.19176 | 38.92432 | 0.00403 | 38.92432 | 0.6019  | 38.92432 | 1.19793 | 38.9243 | 1.79842 | 38.92432 | 2.4031  |
| 172.247 | 0.19194 | 38.94401 | 0.00496 | 38.94401 | 0.60284 | 38.94401 | 1.20076 | 38.944  | 1.80283 | 38.94401 | 2.40468 |
| 172.347 | 0.19149 | 38.9637  | 0.01043 | 38.9637  | 0.60185 | 38.9637  | 1.19822 | 38.9637 | 1.80524 | 38.9637  | 2.40281 |
| 172.447 | 0.1916  | 38.98339 | 0.00715 | 38.98339 | 0.60304 | 38.98339 | 1.20131 | 38.9834 | 1.80546 | 38.98339 | 2.40258 |
| 172.547 | 0.19158 | 39.00307 | 0.00329 | 39.00307 | 0.60586 | 39.00307 | 1.20393 | 39.0031 | 1.80336 | 39.00307 | 2.40217 |
| 172.647 | 0.19146 | 39.02277 | 0.00104 | 39.02277 | 0.60587 | 39.02277 | 1.20051 | 39.0228 | 1.8034  | 39.02277 | 2.40454 |
| 172.747 | 0.19126 | 39.04245 | 0.00788 | 39.04245 | 0.60056 | 39.04245 | 1.2008  | 39.0425 | 1.80006 | 39.04245 | 2.40667 |
| 172.847 | 0.19118 | 39.06214 | 0.00401 | 39.06214 | 0.6     | 39.06214 | 1.20152 | 39.0621 | 1.80796 | 39.06214 | 2.40498 |
| 172.947 | 0.19119 | 39.08183 | 0.00236 | 39.08183 | 0.60306 | 39.08183 | 1.19975 | 39.0818 | 1.79956 | 39.08183 | 2.40451 |
| 173.047 | 0.1911  | 39.10152 | 0.00919 | 39.10152 | 0.60413 | 39.10152 | 1.20144 | 39.1015 | 1.80109 | 39.10152 | 2.40294 |
| 173.147 | 0.19105 | 39.12121 | 0.0063  | 39.12121 | 0.60738 | 39.12121 | 1.20101 | 39.1212 | 1.79975 | 39.12121 | 2.40089 |
| 173.247 | 0.1908  | 39.1409  | 0.00535 | 39.1409  | 0.60769 | 39.1409  | 1.20539 | 39.1409 | 1.80272 | 39.1409  | 2.40042 |
| 173.347 | 0.1905  | 39.16059 | 0.00292 | 39.16059 | 0.60575 | 39.16059 | 1.20574 | 39.1606 | 1.80344 | 39.16059 | 2.4051  |
| 173.447 | 0.18973 | 39.18028 | 0.0115  | 39.18028 | 0.59886 | 39.18028 | 1.20087 | 39.1803 | 1.80028 | 39.18028 | 2.40268 |
| 173.547 | 0.18995 | 39.19997 | 0.00557 | 39.19997 | 0.60418 | 39.19997 | 1.19921 | 39.2    | 1.80025 | 39.19997 | 2.3982  |
| 173.647 | 0.18991 | 39.21965 | 0.00929 | 39.21965 | 0.60236 | 39.21965 | 1.20405 | 39.2197 | 1.79847 | 39.21965 | 2.40034 |
| 173.747 | 0.19015 | 39.23935 | 0.01081 | 39.23935 | 0.60912 | 39.23935 | 1.19898 | 39.2394 | 1.80063 | 39.23935 | 2.40435 |
| 173.847 | 0.19011 | 39.25903 | 0.0048  | 39.25903 | 0.60768 | 39.25903 | 1.20191 | 39.259  | 1.80585 | 39.25903 | 2.40296 |
| 173.947 | 0.18995 | 39.27872 | 0.0082  | 39.27872 | 0.60787 | 39.27872 | 1.2052  | 39.2787 | 1.80263 | 39.27872 | 2.40237 |
| 174.047 | 0.19018 | 39.29841 | 0.01102 | 39.29841 | 0.60849 | 39.29841 | 1.19941 | 39.2984 | 1.80198 | 39.29841 | 2.39838 |
| 174.147 | 0.19012 | 39.3181  | 0.01455 | 39.3181  | 0.61124 | 39.3181  | 1.19754 | 39.3181 | 1.80126 | 39.3181  | 2.40033 |
| 174.247 | 0.19021 | 39.33779 | 0.00861 | 39.33779 | 0.60886 | 39.33779 | 1.20362 | 39.3378 | 1.79848 | 39.33779 | 2.39755 |
| 174.347 | 0.19    | 39.35748 | 0.01305 | 39.35748 | 0.61186 | 39.35748 | 1.20108 | 39.3575 | 1.80176 | 39.35748 | 2.40313 |
| 174.447 | 0.18979 | 39.37717 | 0.00886 | 39.37717 | 0.61236 | 39.37717 | 1.20215 | 39.3772 | 1.80423 | 39.37717 | 2.39799 |
| 174.547 | 0.19002 | 39.39686 | 0.01201 | 39.39686 | 0.60441 | 39.39686 | 1.20394 | 39.3969 | 1.79564 | 39.39686 | 2.40042 |
| 174.647 | 0.18996 | 39.41655 | 0.01366 | 39.41655 | 0.61305 | 39.41655 | 1.20187 | 39.4166 | 1.80423 | 39.41655 | 2.40328 |
| 174.747 | 0.19011 | 39.43624 | 0.01057 | 39.43624 | 0.60641 | 39.43624 | 1.20129 | 39.4362 | 1.79908 | 39.43624 | 2.40299 |
| 174.847 | 0.18998 | 39.45592 | 0.00794 | 39.45592 | 0.61254 | 39.45592 | 1.20236 | 39.4559 | 1.80567 | 39.45592 | 2.40203 |
| 174.947 | 0.18971 | 39.47561 | 0.00953 | 39.47561 | 0.6121  | 39.47561 | 1.19976 | 39.4756 | 1.80352 | 39.47561 | 2.40168 |
| 175.047 | 0.19022 | 39.4953  | 0.01429 | 39.4953  | 0.60897 | 39.4953  | 1.20672 | 39.4953 | 1.8008  | 39.4953  | 2.40163 |
| 175.147 | 0.19016 | 39.51499 | 0.00894 | 39.51499 | 0.61154 | 39.51499 | 1.20144 | 39.515  | 1.79915 | 39.51499 | 2.40394 |
| 175.247 | 0.1903  | 39.53468 | 0.01305 | 39.53468 | 0.61435 | 39.53468 | 1.19957 | 39.5347 | 1.80024 | 39.53468 | 2.40164 |
| 175.347 | 0.19026 | 39.55437 | 0.01704 | 39.55437 | 0.60934 | 39.55437 | 1.20772 | 39.5544 | 1.80009 | 39.55437 | 2.39784 |



|         |         |
|---------|---------|
| 179.847 | 0.192   |
| 179.947 | 0.19189 |
| 180.047 | 0.19236 |
| 180.147 | 0.19235 |
| 180.247 | 0.19228 |
| 180.347 | 0.1923  |
| 180.447 | 0.1923  |
| 180.547 | 0.19238 |
| 180.647 | 0.19295 |
| 180.747 | 0.19322 |
| 180.847 | 0.19336 |
| 180.947 | 0.19326 |
| 181.047 | 0.19372 |
| 181.147 | 0.19348 |
| 181.247 | 0.1936  |
| 181.347 | 0.19387 |
| 181.447 | 0.19381 |
| 181.547 | 0.19418 |
| 181.647 | 0.19443 |
| 181.747 | 0.19441 |
| 181.847 | 0.19482 |
| 181.947 | 0.19501 |
| 182.047 | 0.19578 |
| 182.147 | 0.19613 |
| 182.247 | 0.19612 |
| 182.347 | 0.19629 |
| 182.447 | 0.19658 |
| 182.547 | 0.19667 |
| 182.647 | 0.19702 |
| 182.747 | 0.19733 |
| 182.847 | 0.19743 |
| 182.947 | 0.19802 |
| 183.047 | 0.19865 |
| 183.147 | 0.19911 |
| 183.247 | 0.19961 |
| 183.347 | 0.19999 |
| 183.447 | 0.20028 |
| 183.547 | 0.20065 |
| 183.647 | 0.20109 |
| 183.747 | 0.20124 |
| 183.847 | 0.20169 |
| 183.947 | 0.20219 |
| 184.047 | 0.20257 |
| 184.147 | 0.20266 |

|         |         |
|---------|---------|
| 184.247 | 0.20297 |
| 184.347 | 0.20331 |
| 184.447 | 0.20341 |
| 184.547 | 0.20377 |
| 184.647 | 0.20397 |
| 184.747 | 0.20434 |
| 184.847 | 0.20457 |
| 184.947 | 0.20481 |
| 185.047 | 0.20507 |
| 185.147 | 0.2053  |
| 185.247 | 0.20549 |
| 185.347 | 0.20581 |
| 185.447 | 0.20672 |
| 185.547 | 0.20649 |
| 185.647 | 0.20652 |
| 185.747 | 0.20704 |
| 185.847 | 0.20702 |
| 185.947 | 0.20716 |
| 186.047 | 0.20737 |
| 186.147 | 0.20785 |
| 186.247 | 0.2078  |
| 186.347 | 0.20781 |
| 186.447 | 0.20869 |
| 186.547 | 0.20862 |
| 186.647 | 0.20886 |
| 186.747 | 0.20884 |
| 186.847 | 0.20923 |
| 186.947 | 0.20938 |
| 187.047 | 0.20972 |
| 187.147 | 0.20982 |
| 187.247 | 0.21003 |
| 187.347 | 0.21019 |
| 187.447 | 0.21038 |
| 187.547 | 0.21062 |
| 187.647 | 0.21113 |
| 187.747 | 0.21133 |
| 187.847 | 0.21126 |
| 187.947 | 0.21166 |
| 188.047 | 0.21183 |
| 188.147 | 0.21221 |
| 188.247 | 0.21204 |
| 188.347 | 0.21255 |
| 188.447 | 0.21234 |
| 188.547 | 0.2126  |

|         |         |
|---------|---------|
| 188.647 | 0.21311 |
| 188.747 | 0.21346 |
| 188.847 | 0.21338 |
| 188.947 | 0.21339 |
| 189.047 | 0.21328 |
| 189.147 | 0.21347 |
| 189.247 | 0.21387 |
| 189.347 | 0.21417 |
| 189.447 | 0.2145  |
| 189.547 | 0.21429 |
| 189.647 | 0.21415 |
| 189.747 | 0.21441 |
| 189.847 | 0.21451 |
| 189.947 | 0.21418 |
| 190.047 | 0.21406 |
| 190.147 | 0.2137  |
| 190.247 | 0.21343 |
| 190.347 | 0.21308 |
| 190.447 | 0.21281 |
| 190.547 | 0.21221 |
| 190.647 | 0.21201 |
| 190.747 | 0.21184 |
| 190.847 | 0.21106 |
| 190.947 | 0.21029 |
| 191.047 | 0.20928 |
| 191.147 | 0.20833 |
| 191.247 | 0.20729 |
| 191.347 | 0.20588 |
| 191.447 | 0.20478 |
| 191.547 | 0.2026  |
| 191.647 | 0.20102 |
| 191.747 | 0.20001 |
| 191.847 | 0.19791 |
| 191.947 | 0.19578 |
| 192.047 | 0.1933  |
| 192.147 | 0.19073 |
| 192.247 | 0.18829 |
| 192.347 | 0.18488 |
| 192.447 | 0.18206 |
| 192.547 | 0.17819 |
| 192.647 | 0.17512 |
| 192.747 | 0.17048 |
| 192.847 | 0.16581 |
| 192.947 | 0.16088 |

|         |          |
|---------|----------|
| 193.047 | 0.1565   |
| 193.147 | 0.1515   |
| 193.247 | 0.1455   |
| 193.347 | 0.13936  |
| 193.447 | 0.13242  |
| 193.547 | 0.1255   |
| 193.647 | 0.11819  |
| 193.747 | 0.11058  |
| 193.847 | 0.10281  |
| 193.947 | 0.09381  |
| 194.047 | 0.08418  |
| 194.147 | 0.07456  |
| 194.247 | 0.06402  |
| 194.347 | 0.05284  |
| 194.447 | 0.04243  |
| 194.547 | 0.03177  |
| 194.647 | 0.02023  |
| 194.747 | 0.00762  |
| 194.847 | -0.00544 |
| 194.947 | -0.0183  |
| 195.047 | -0.03253 |
| 195.147 | -0.04652 |
| 195.247 | -0.06052 |
| 195.347 | -0.0749  |
| 195.447 | -0.08918 |
| 195.547 | -0.1046  |
| 195.647 | -0.12027 |
| 195.747 | -0.13556 |
| 195.847 | -0.15164 |
| 195.947 | -0.1674  |
| 196.047 | -0.18303 |
| 196.147 | -0.19857 |
| 196.247 | -0.21347 |
| 196.347 | -0.22851 |
| 196.447 | -0.24217 |
| 196.547 | -0.25627 |
| 196.647 | -0.26978 |
| 196.747 | -0.28351 |
| 196.847 | -0.297   |
| 196.947 | -0.30798 |
| 197.047 | -0.31872 |
| 197.147 | -0.32881 |
| 197.247 | -0.33807 |
| 197.347 | -0.3445  |

|         |          |
|---------|----------|
| 197.447 | -0.35039 |
| 197.547 | -0.35629 |
| 197.647 | -0.36205 |
| 197.747 | -0.36668 |
| 197.847 | -0.36874 |
| 197.947 | -0.36929 |
| 198.047 | -0.36952 |
| 198.147 | -0.36897 |
| 198.247 | -0.36784 |
| 198.347 | -0.36397 |
| 198.447 | -0.3597  |
| 198.547 | -0.35339 |
| 198.647 | -0.34754 |
| 198.747 | -0.34074 |
| 198.847 | -0.33187 |
| 198.947 | -0.32281 |
| 199.047 | -0.31373 |
| 199.147 | -0.30391 |
| 199.247 | -0.29187 |
| 199.347 | -0.27946 |
| 199.447 | -0.26729 |
| 199.547 | -0.25518 |
| 199.647 | -0.2428  |
| 199.747 | -0.22938 |
| 199.847 | -0.21524 |
| 199.947 | -0.20145 |
| 200.047 | -0.18775 |
| 200.147 | -0.17326 |
| 200.247 | -0.15899 |
| 200.347 | -0.14493 |
| 200.447 | -0.13104 |
| 200.547 | -0.11694 |
| 200.647 | -0.1027  |
| 200.747 | -0.08891 |
| 200.847 | -0.07485 |
| 200.947 | -0.06225 |
| 201.047 | -0.04858 |
| 201.147 | -0.03515 |
| 201.247 | -0.02254 |
| 201.347 | -0.01082 |
| 201.447 | 0.0015   |
| 201.547 | 0.01302  |
| 201.647 | 0.02325  |
| 201.747 | 0.03389  |



|         |         |
|---------|---------|
| 201.847 | 0.04434 |
| 201.947 | 0.05377 |
| 202.047 | 0.06244 |
| 202.147 | 0.07134 |
| 202.247 | 0.07853 |
| 202.347 | 0.08591 |
| 202.447 | 0.09243 |
| 202.547 | 0.099   |
| 202.647 | 0.10496 |
| 202.747 | 0.11047 |
| 202.847 | 0.11533 |
| 202.947 | 0.11985 |
| 203.047 | 0.12267 |
| 203.147 | 0.12693 |
| 203.247 | 0.12904 |
| 203.347 | 0.13331 |
| 203.447 | 0.13555 |
| 203.547 | 0.13706 |
| 203.647 | 0.1397  |
| 203.747 | 0.14117 |
| 203.847 | 0.14333 |
| 203.947 | 0.14469 |
| 204.047 | 0.14572 |
| 204.147 | 0.14662 |
| 204.247 | 0.14754 |
| 204.347 | 0.14806 |
| 204.447 | 0.14893 |
| 204.547 | 0.14984 |
| 204.647 | 0.15047 |
| 204.747 | 0.1512  |
| 204.847 | 0.15157 |
| 204.947 | 0.15171 |
| 205.047 | 0.15267 |
| 205.147 | 0.1523  |
| 205.247 | 0.15244 |
| 205.347 | 0.15246 |
| 205.447 | 0.15285 |
| 205.547 | 0.15292 |
| 205.647 | 0.15309 |
| 205.747 | 0.15322 |
| 205.847 | 0.15301 |
| 205.947 | 0.15308 |
| 206.047 | 0.15328 |
| 206.147 | 0.15329 |

|         |         |
|---------|---------|
| 206.247 | 0.15345 |
| 206.347 | 0.15366 |
| 206.447 | 0.15354 |
| 206.547 | 0.15324 |
| 206.647 | 0.15313 |
| 206.747 | 0.15331 |
| 206.847 | 0.15335 |
| 206.947 | 0.1533  |
| 207.047 | 0.15313 |
| 207.147 | 0.15324 |
| 207.247 | 0.15344 |
| 207.347 | 0.15356 |
| 207.447 | 0.15403 |
| 207.547 | 0.15358 |
| 207.647 | 0.15365 |
| 207.747 | 0.15357 |
| 207.847 | 0.15352 |
| 207.947 | 0.15365 |
| 208.047 | 0.15346 |
| 208.147 | 0.15333 |
| 208.247 | 0.15384 |
| 208.347 | 0.15395 |
| 208.447 | 0.15391 |
| 208.547 | 0.15369 |
| 208.647 | 0.15392 |
| 208.747 | 0.15403 |
| 208.847 | 0.15389 |
| 208.947 | 0.15401 |
| 209.047 | 0.15384 |
| 209.147 | 0.15353 |
| 209.247 | 0.15385 |
| 209.347 | 0.15387 |
| 209.447 | 0.15364 |
| 209.547 | 0.15373 |
| 209.647 | 0.15389 |
| 209.747 | 0.15345 |
| 209.847 | 0.15368 |
| 209.947 | 0.15342 |
| 210.047 | 0.15365 |
| 210.147 | 0.15378 |
| 210.247 | 0.15351 |
| 210.347 | 0.15359 |
| 210.447 | 0.15331 |
| 210.547 | 0.15338 |

|         |         |
|---------|---------|
| 210.647 | 0.15355 |
| 210.747 | 0.15363 |
| 210.847 | 0.1535  |
| 210.947 | 0.1535  |
| 211.047 | 0.15324 |
| 211.147 | 0.15316 |
| 211.247 | 0.15303 |
| 211.347 | 0.15332 |
| 211.447 | 0.1532  |
| 211.547 | 0.15313 |
| 211.647 | 0.15286 |
| 211.747 | 0.15272 |
| 211.847 | 0.15274 |
| 211.947 | 0.15281 |
| 212.047 | 0.1529  |
| 212.147 | 0.15277 |
| 212.247 | 0.1521  |
| 212.347 | 0.15204 |
| 212.447 | 0.1522  |
| 212.547 | 0.152   |
| 212.647 | 0.1517  |
| 212.747 | 0.15187 |
| 212.847 | 0.15196 |
| 212.947 | 0.15182 |
| 213.047 | 0.15183 |
| 213.147 | 0.15175 |
| 213.247 | 0.15171 |
| 213.347 | 0.15142 |
| 213.447 | 0.15143 |
| 213.547 | 0.15174 |
| 213.647 | 0.1516  |
| 213.747 | 0.15206 |
| 213.847 | 0.15184 |
| 213.947 | 0.15173 |
| 214.047 | 0.1514  |
| 214.147 | 0.15178 |
| 214.247 | 0.15196 |
| 214.347 | 0.15199 |
| 214.447 | 0.15196 |
| 214.547 | 0.15235 |
| 214.647 | 0.15233 |
| 214.747 | 0.15256 |
| 214.847 | 0.15246 |
| 214.947 | 0.15268 |

|         |         |
|---------|---------|
| 215.047 | 0.15332 |
| 215.147 | 0.15304 |
| 215.247 | 0.15357 |
| 215.347 | 0.15369 |
| 215.447 | 0.15368 |
| 215.547 | 0.15345 |
| 215.647 | 0.15327 |
| 215.747 | 0.15361 |
| 215.847 | 0.1541  |
| 215.947 | 0.15452 |
| 216.047 | 0.15454 |
| 216.147 | 0.15432 |
| 216.247 | 0.15415 |
| 216.347 | 0.15389 |
| 216.447 | 0.15352 |
| 216.547 | 0.15392 |
| 216.647 | 0.15409 |
| 216.747 | 0.1541  |
| 216.847 | 0.15412 |
| 216.947 | 0.15388 |
| 217.047 | 0.15399 |
| 217.147 | 0.15348 |
| 217.247 | 0.1538  |
| 217.347 | 0.15359 |
| 217.447 | 0.15339 |
| 217.547 | 0.15332 |
| 217.647 | 0.15342 |
| 217.747 | 0.15306 |
| 217.847 | 0.15285 |
| 217.947 | 0.15293 |
| 218.047 | 0.15317 |
| 218.147 | 0.1531  |
| 218.247 | 0.15319 |
| 218.347 | 0.15297 |
| 218.447 | 0.15255 |
| 218.547 | 0.15263 |
| 218.647 | 0.15214 |
| 218.747 | 0.15221 |
| 218.847 | 0.15222 |
| 218.947 | 0.15216 |
| 219.047 | 0.15224 |
| 219.147 | 0.15181 |
| 219.247 | 0.1519  |
| 219.347 | 0.15175 |

|         |         |
|---------|---------|
| 219.447 | 0.15185 |
| 219.547 | 0.15143 |
| 219.647 | 0.15114 |
| 219.747 | 0.15065 |
| 219.847 | 0.15028 |
| 219.947 | 0.14942 |
| 220.047 | 0.14956 |
| 220.147 | 0.14943 |
| 220.247 | 0.14923 |
| 220.347 | 0.14887 |
| 220.447 | 0.14874 |
| 220.547 | 0.14821 |
| 220.647 | 0.14786 |
| 220.747 | 0.14809 |
| 220.847 | 0.14803 |
| 220.947 | 0.14745 |
| 221.047 | 0.14731 |
| 221.147 | 0.14704 |
| 221.247 | 0.14689 |
| 221.347 | 0.14675 |
| 221.447 | 0.14654 |
| 221.547 | 0.14648 |
| 221.647 | 0.14612 |
| 221.747 | 0.14605 |
| 221.847 | 0.14584 |
| 221.947 | 0.14549 |
| 222.047 | 0.1455  |
| 222.147 | 0.1455  |
| 222.247 | 0.14536 |
| 222.347 | 0.14529 |
| 222.447 | 0.14518 |
| 222.547 | 0.14488 |
| 222.647 | 0.14485 |
| 222.747 | 0.14489 |
| 222.847 | 0.1447  |
| 222.947 | 0.1447  |
| 223.047 | 0.14478 |
| 223.147 | 0.14457 |
| 223.247 | 0.14421 |
| 223.347 | 0.14419 |
| 223.447 | 0.14386 |
| 223.547 | 0.1436  |
| 223.647 | 0.14332 |
| 223.747 | 0.14306 |

|         |         |
|---------|---------|
| 223.847 | 0.14314 |
| 223.947 | 0.14333 |
| 224.047 | 0.14331 |
| 224.147 | 0.14293 |
| 224.247 | 0.14321 |
| 224.347 | 0.14384 |
| 224.447 | 0.14365 |
| 224.547 | 0.14349 |
| 224.647 | 0.14335 |
| 224.747 | 0.14373 |
| 224.847 | 0.14381 |
| 224.947 | 0.14372 |
| 225.047 | 0.14325 |
| 225.147 | 0.14312 |
| 225.247 | 0.14305 |
| 225.347 | 0.14294 |
| 225.447 | 0.14294 |
| 225.547 | 0.14309 |
| 225.647 | 0.14332 |
| 225.747 | 0.14336 |
| 225.847 | 0.14341 |
| 225.947 | 0.14342 |
| 226.047 | 0.14334 |
| 226.147 | 0.14316 |
| 226.247 | 0.14328 |
| 226.347 | 0.14323 |
| 226.447 | 0.14291 |
| 226.547 | 0.14322 |
| 226.647 | 0.143   |
| 226.747 | 0.14314 |
| 226.847 | 0.14307 |
| 226.947 | 0.14331 |
| 227.047 | 0.1435  |
| 227.147 | 0.14311 |
| 227.247 | 0.14315 |
| 227.347 | 0.1431  |
| 227.447 | 0.14322 |
| 227.547 | 0.1434  |
| 227.647 | 0.14316 |
| 227.747 | 0.14313 |
| 227.847 | 0.14291 |
| 227.947 | 0.14366 |
| 228.047 | 0.14394 |
| 228.147 | 0.14385 |

|         |         |
|---------|---------|
| 228.247 | 0.14327 |
| 228.347 | 0.1432  |
| 228.447 | 0.14331 |
| 228.547 | 0.14346 |
| 228.647 | 0.14332 |
| 228.747 | 0.14377 |
| 228.847 | 0.14381 |
| 228.947 | 0.14387 |
| 229.047 | 0.14414 |
| 229.147 | 0.14394 |
| 229.247 | 0.14415 |
| 229.347 | 0.1441  |
| 229.447 | 0.14426 |
| 229.547 | 0.14472 |
| 229.647 | 0.14487 |
| 229.747 | 0.1453  |
| 229.847 | 0.14564 |
| 229.947 | 0.14585 |
| 230.047 | 0.14594 |
| 230.147 | 0.14647 |
| 230.247 | 0.14674 |
| 230.347 | 0.14708 |
| 230.447 | 0.14743 |
| 230.547 | 0.14754 |
| 230.647 | 0.1479  |
| 230.747 | 0.14824 |
| 230.847 | 0.14809 |
| 230.947 | 0.14852 |
| 231.047 | 0.14914 |
| 231.147 | 0.14958 |
| 231.247 | 0.15012 |
| 231.347 | 0.15088 |
| 231.447 | 0.15123 |
| 231.547 | 0.15156 |
| 231.647 | 0.15182 |
| 231.747 | 0.15236 |
| 231.847 | 0.15274 |
| 231.947 | 0.15329 |
| 232.047 | 0.15393 |
| 232.147 | 0.15399 |
| 232.247 | 0.15395 |
| 232.347 | 0.15432 |
| 232.447 | 0.15469 |
| 232.547 | 0.15478 |

|         |         |
|---------|---------|
| 232.647 | 0.15533 |
| 232.747 | 0.1557  |
| 232.847 | 0.15601 |
| 232.947 | 0.15639 |
| 233.047 | 0.15677 |
| 233.147 | 0.15708 |
| 233.247 | 0.15739 |
| 233.347 | 0.15747 |
| 233.447 | 0.15794 |
| 233.547 | 0.15802 |
| 233.647 | 0.15865 |
| 233.747 | 0.15876 |
| 233.847 | 0.15879 |
| 233.947 | 0.15925 |
| 234.047 | 0.15913 |
| 234.147 | 0.1595  |
| 234.247 | 0.15962 |
| 234.347 | 0.15956 |
| 234.447 | 0.16    |
| 234.547 | 0.16026 |
| 234.647 | 0.16025 |
| 234.747 | 0.16044 |
| 234.847 | 0.16042 |
| 234.947 | 0.1606  |
| 235.047 | 0.16078 |
| 235.147 | 0.16127 |
| 235.247 | 0.16111 |
| 235.347 | 0.16168 |
| 235.447 | 0.1612  |
| 235.547 | 0.16119 |
| 235.647 | 0.16157 |
| 235.747 | 0.16229 |
| 235.847 | 0.16218 |
| 235.947 | 0.16242 |
| 236.047 | 0.16257 |
| 236.147 | 0.16277 |
| 236.247 | 0.16273 |
| 236.347 | 0.16309 |
| 236.447 | 0.16321 |
| 236.547 | 0.16357 |
| 236.647 | 0.16397 |
| 236.747 | 0.16399 |
| 236.847 | 0.16387 |
| 236.947 | 0.16412 |



|         |         |
|---------|---------|
| 237.047 | 0.16434 |
| 237.147 | 0.16402 |
| 237.247 | 0.16448 |
| 237.347 | 0.16459 |
| 237.447 | 0.16472 |
| 237.547 | 0.16494 |
| 237.647 | 0.16505 |
| 237.747 | 0.16566 |
| 237.847 | 0.1654  |
| 237.947 | 0.16545 |
| 238.047 | 0.16594 |
| 238.147 | 0.16578 |
| 238.247 | 0.16647 |
| 238.347 | 0.16649 |
| 238.447 | 0.16658 |
| 238.547 | 0.16644 |
| 238.647 | 0.16675 |
| 238.747 | 0.16706 |
| 238.847 | 0.16708 |
| 238.947 | 0.16717 |
| 239.047 | 0.16763 |
| 239.147 | 0.16801 |
| 239.247 | 0.16788 |
| 239.347 | 0.16835 |
| 239.447 | 0.1691  |
| 239.547 | 0.16912 |
| 239.647 | 0.16942 |
| 239.747 | 0.16937 |
| 239.847 | 0.16974 |
| 239.947 | 0.16991 |
| 240.047 | 0.17053 |
| 240.147 | 0.17091 |
| 240.247 | 0.17122 |
| 240.347 | 0.17161 |
| 240.447 | 0.1716  |
| 240.547 | 0.17134 |
| 240.647 | 0.17188 |
| 240.747 | 0.17187 |
| 240.847 | 0.17236 |
| 240.947 | 0.17296 |
| 241.047 | 0.17315 |
| 241.147 | 0.17391 |
| 241.247 | 0.17407 |
| 241.347 | 0.17451 |

|         |         |
|---------|---------|
| 241.447 | 0.17451 |
| 241.547 | 0.1744  |
| 241.647 | 0.1747  |
| 241.747 | 0.17527 |
| 241.847 | 0.17491 |
| 241.947 | 0.1753  |
| 242.047 | 0.17584 |
| 242.147 | 0.17594 |
| 242.247 | 0.17612 |
| 242.347 | 0.17636 |
| 242.447 | 0.1762  |
| 242.547 | 0.17654 |
| 242.647 | 0.17702 |
| 242.747 | 0.17699 |
| 242.847 | 0.17719 |
| 242.947 | 0.17737 |
| 243.047 | 0.17712 |
| 243.147 | 0.17747 |
| 243.247 | 0.17774 |
| 243.347 | 0.17815 |
| 243.447 | 0.17806 |
| 243.547 | 0.1787  |
| 243.647 | 0.1791  |
| 243.747 | 0.17913 |
| 243.847 | 0.17903 |
| 243.947 | 0.17895 |
| 244.047 | 0.17937 |
| 244.147 | 0.1793  |
| 244.247 | 0.17931 |
| 244.347 | 0.17972 |
| 244.447 | 0.18006 |
| 244.547 | 0.18021 |
| 244.647 | 0.18015 |
| 244.747 | 0.18032 |
| 244.847 | 0.1807  |
| 244.947 | 0.18081 |
| 245.047 | 0.18089 |
| 245.147 | 0.18084 |
| 245.247 | 0.1808  |
| 245.347 | 0.18115 |
| 245.447 | 0.1811  |
| 245.547 | 0.18119 |
| 245.647 | 0.18107 |
| 245.747 | 0.18123 |

|         |         |
|---------|---------|
| 245.847 | 0.18138 |
| 245.947 | 0.18157 |
| 246.047 | 0.18188 |
| 246.147 | 0.18179 |
| 246.247 | 0.18208 |
| 246.347 | 0.18267 |
| 246.447 | 0.1826  |
| 246.547 | 0.18302 |
| 246.647 | 0.18315 |
| 246.747 | 0.18348 |
| 246.847 | 0.18364 |
| 246.947 | 0.18395 |
| 247.047 | 0.18382 |
| 247.147 | 0.18388 |
| 247.247 | 0.18431 |
| 247.347 | 0.18472 |
| 247.447 | 0.18504 |
| 247.547 | 0.18518 |
| 247.647 | 0.18567 |
| 247.747 | 0.18579 |
| 247.847 | 0.18585 |
| 247.947 | 0.18631 |
| 248.047 | 0.18655 |
| 248.147 | 0.18635 |
| 248.247 | 0.18643 |
| 248.347 | 0.18673 |
| 248.447 | 0.18659 |
| 248.547 | 0.18692 |
| 248.647 | 0.1873  |
| 248.747 | 0.18723 |
| 248.847 | 0.1871  |
| 248.947 | 0.18719 |
| 249.047 | 0.18713 |
| 249.147 | 0.18767 |
| 249.247 | 0.18798 |
| 249.347 | 0.1883  |
| 249.447 | 0.1881  |
| 249.547 | 0.18842 |
| 249.647 | 0.1882  |
| 249.747 | 0.18807 |
| 249.847 | 0.18808 |
| 249.947 | 0.18817 |
| 250.047 | 0.1881  |
| 250.147 | 0.18826 |

|         |         |
|---------|---------|
| 250.247 | 0.18857 |
| 250.347 | 0.18853 |
| 250.447 | 0.18858 |
| 250.547 | 0.1887  |
| 250.647 | 0.18886 |
| 250.747 | 0.18865 |
| 250.847 | 0.18816 |
| 250.947 | 0.18854 |
| 251.047 | 0.18854 |
| 251.147 | 0.18815 |
| 251.247 | 0.18777 |
| 251.347 | 0.18811 |
| 251.447 | 0.188   |
| 251.547 | 0.18827 |
| 251.647 | 0.18812 |
| 251.747 | 0.18764 |
| 251.847 | 0.18727 |
| 251.947 | 0.18727 |
| 252.047 | 0.18699 |
| 252.147 | 0.18682 |
| 252.247 | 0.18729 |
| 252.347 | 0.18704 |
| 252.447 | 0.18689 |
| 252.547 | 0.18675 |
| 252.647 | 0.18692 |
| 252.747 | 0.18679 |
| 252.847 | 0.18674 |
| 252.947 | 0.18666 |
| 253.047 | 0.18662 |
| 253.147 | 0.18661 |
| 253.247 | 0.1864  |
| 253.347 | 0.1862  |
| 253.447 | 0.18645 |
| 253.547 | 0.18644 |
| 253.647 | 0.18609 |
| 253.747 | 0.18626 |
| 253.847 | 0.18582 |
| 253.947 | 0.18575 |
| 254.047 | 0.18532 |
| 254.147 | 0.18533 |
| 254.247 | 0.18535 |
| 254.347 | 0.18529 |
| 254.447 | 0.18515 |
| 254.547 | 0.18516 |

|         |         |
|---------|---------|
| 254.647 | 0.18496 |
| 254.747 | 0.18482 |
| 254.847 | 0.18499 |
| 254.947 | 0.18515 |
| 255.047 | 0.18493 |
| 255.147 | 0.18464 |
| 255.247 | 0.18436 |
| 255.347 | 0.18393 |
| 255.447 | 0.18415 |
| 255.547 | 0.18389 |
| 255.647 | 0.18385 |
| 255.747 | 0.18399 |
| 255.847 | 0.18378 |
| 255.947 | 0.18388 |
| 256.047 | 0.18395 |
| 256.147 | 0.18404 |
| 256.247 | 0.18428 |
| 256.347 | 0.18441 |
| 256.447 | 0.18432 |
| 256.547 | 0.18456 |
| 256.647 | 0.18445 |
| 256.747 | 0.18446 |
| 256.847 | 0.18485 |
| 256.947 | 0.18494 |
| 257.047 | 0.18456 |
| 257.147 | 0.18474 |
| 257.247 | 0.18476 |
| 257.347 | 0.18467 |
| 257.447 | 0.18438 |
| 257.547 | 0.18431 |
| 257.647 | 0.18444 |
| 257.747 | 0.18476 |
| 257.847 | 0.18469 |
| 257.947 | 0.18467 |
| 258.047 | 0.18453 |
| 258.147 | 0.18468 |
| 258.247 | 0.1848  |
| 258.347 | 0.18478 |
| 258.447 | 0.18478 |
| 258.547 | 0.18484 |
| 258.647 | 0.18535 |
| 258.747 | 0.1854  |
| 258.847 | 0.18541 |
| 258.947 | 0.18545 |

|         |         |
|---------|---------|
| 259.047 | 0.18541 |
| 259.147 | 0.18525 |
| 259.247 | 0.18519 |
| 259.347 | 0.18524 |
| 259.447 | 0.18522 |
| 259.547 | 0.18578 |
| 259.647 | 0.18549 |
| 259.747 | 0.18527 |
| 259.847 | 0.18516 |
| 259.947 | 0.18518 |
| 260.047 | 0.18533 |
| 260.147 | 0.18586 |
| 260.247 | 0.18582 |
| 260.347 | 0.18535 |
| 260.447 | 0.18538 |
| 260.547 | 0.18539 |
| 260.647 | 0.18571 |
| 260.747 | 0.18554 |
| 260.847 | 0.18527 |
| 260.947 | 0.18516 |
| 261.047 | 0.18559 |
| 261.147 | 0.18566 |
| 261.247 | 0.18558 |
| 261.347 | 0.18544 |
| 261.447 | 0.18544 |
| 261.547 | 0.18547 |
| 261.647 | 0.18525 |
| 261.747 | 0.18535 |
| 261.847 | 0.18539 |
| 261.947 | 0.18523 |
| 262.047 | 0.18495 |
| 262.147 | 0.1849  |
| 262.247 | 0.18512 |
| 262.347 | 0.18491 |
| 262.447 | 0.1854  |
| 262.547 | 0.18491 |
| 262.647 | 0.18502 |
| 262.747 | 0.18492 |
| 262.847 | 0.18555 |
| 262.947 | 0.18615 |
| 263.047 | 0.18654 |
| 263.147 | 0.18656 |
| 263.247 | 0.18658 |
| 263.347 | 0.18669 |

|         |         |
|---------|---------|
| 263.447 | 0.18731 |
| 263.547 | 0.18755 |
| 263.647 | 0.18764 |
| 263.747 | 0.18787 |
| 263.847 | 0.18804 |
| 263.947 | 0.18852 |
| 264.047 | 0.18853 |
| 264.147 | 0.18885 |
| 264.247 | 0.18871 |
| 264.347 | 0.18873 |
| 264.447 | 0.18897 |
| 264.547 | 0.18937 |
| 264.647 | 0.18939 |
| 264.747 | 0.18968 |
| 264.847 | 0.18971 |
| 264.947 | 0.19019 |
| 265.047 | 0.19027 |
| 265.147 | 0.19055 |
| 265.247 | 0.19067 |
| 265.347 | 0.19088 |
| 265.447 | 0.19052 |
| 265.547 | 0.1908  |
| 265.647 | 0.19067 |
| 265.747 | 0.19097 |
| 265.847 | 0.1912  |
| 265.947 | 0.19092 |
| 266.047 | 0.19101 |
| 266.147 | 0.19101 |
| 266.247 | 0.19143 |
| 266.347 | 0.19161 |
| 266.447 | 0.19187 |
| 266.547 | 0.19203 |
| 266.647 | 0.19215 |
| 266.747 | 0.19161 |
| 266.847 | 0.19167 |
| 266.947 | 0.1923  |
| 267.047 | 0.19203 |
| 267.147 | 0.19175 |
| 267.247 | 0.19183 |
| 267.347 | 0.19225 |
| 267.447 | 0.19216 |
| 267.547 | 0.19206 |
| 267.647 | 0.19182 |
| 267.747 | 0.19183 |

|         |         |
|---------|---------|
| 267.847 | 0.19226 |
| 267.947 | 0.19235 |
| 268.047 | 0.19235 |
| 268.147 | 0.19209 |
| 268.247 | 0.19216 |
| 268.347 | 0.19234 |
| 268.447 | 0.19211 |
| 268.547 | 0.19246 |
| 268.647 | 0.19248 |
| 268.747 | 0.19236 |
| 268.847 | 0.19213 |
| 268.947 | 0.19234 |
| 269.047 | 0.19235 |
| 269.147 | 0.19244 |
| 269.247 | 0.19235 |
| 269.347 | 0.19241 |
| 269.447 | 0.19241 |
| 269.547 | 0.19233 |
| 269.647 | 0.19231 |
| 269.747 | 0.19222 |
| 269.847 | 0.19198 |
| 269.947 | 0.19192 |
| 270.047 | 0.19203 |
| 270.147 | 0.1918  |
| 270.247 | 0.19184 |
| 270.347 | 0.19169 |
| 270.447 | 0.19178 |
| 270.547 | 0.19173 |
| 270.647 | 0.19201 |
| 270.747 | 0.19165 |
| 270.847 | 0.19128 |
| 270.947 | 0.19124 |
| 271.047 | 0.19142 |
| 271.147 | 0.19158 |
| 271.247 | 0.19176 |
| 271.347 | 0.19156 |
| 271.447 | 0.19169 |
| 271.547 | 0.19194 |
| 271.647 | 0.19186 |
| 271.747 | 0.19158 |
| 271.847 | 0.19185 |
| 271.947 | 0.19209 |
| 272.047 | 0.19195 |
| 272.147 | 0.19213 |



|         |         |
|---------|---------|
| 272.247 | 0.19222 |
| 272.347 | 0.19239 |
| 272.447 | 0.19271 |
| 272.547 | 0.19304 |
| 272.647 | 0.19283 |
| 272.747 | 0.19269 |
| 272.847 | 0.19294 |
| 272.947 | 0.19364 |
| 273.047 | 0.19366 |
| 273.147 | 0.19368 |
| 273.247 | 0.19392 |
| 273.347 | 0.19426 |
| 273.447 | 0.19426 |
| 273.547 | 0.19436 |
| 273.647 | 0.19469 |
| 273.747 | 0.19502 |
| 273.847 | 0.19533 |
| 273.947 | 0.19597 |
| 274.047 | 0.19597 |
| 274.147 | 0.19622 |
| 274.247 | 0.19717 |
| 274.347 | 0.19727 |
| 274.447 | 0.1976  |
| 274.547 | 0.19792 |
| 274.647 | 0.19869 |
| 274.747 | 0.1987  |
| 274.847 | 0.19898 |
| 274.947 | 0.19967 |
| 275.047 | 0.19977 |
| 275.147 | 0.19994 |
| 275.247 | 0.20005 |
| 275.347 | 0.20103 |
| 275.447 | 0.20129 |
| 275.547 | 0.20178 |
| 275.647 | 0.20195 |
| 275.747 | 0.20258 |
| 275.847 | 0.20313 |
| 275.947 | 0.20347 |
| 276.047 | 0.20386 |
| 276.147 | 0.20386 |
| 276.247 | 0.20514 |
| 276.347 | 0.20569 |
| 276.447 | 0.20665 |
| 276.547 | 0.20702 |

|         |         |
|---------|---------|
| 276.647 | 0.20781 |
| 276.747 | 0.2083  |
| 276.847 | 0.20845 |
| 276.947 | 0.2091  |
| 277.047 | 0.20918 |
| 277.147 | 0.20953 |
| 277.247 | 0.21007 |
| 277.347 | 0.21087 |
| 277.447 | 0.21111 |
| 277.547 | 0.21152 |
| 277.647 | 0.21191 |
| 277.747 | 0.21278 |
| 277.847 | 0.21288 |
| 277.947 | 0.21313 |
| 278.047 | 0.21376 |
| 278.147 | 0.21409 |
| 278.247 | 0.21464 |
| 278.347 | 0.21528 |
| 278.447 | 0.21591 |
| 278.547 | 0.21647 |
| 278.647 | 0.21765 |
| 278.747 | 0.21822 |
| 278.847 | 0.21791 |
| 278.947 | 0.21928 |
| 279.047 | 0.21936 |
| 279.147 | 0.22037 |
| 279.247 | 0.22156 |
| 279.347 | 0.22154 |
| 279.447 | 0.22173 |
| 279.547 | 0.22187 |
| 279.647 | 0.22319 |
| 279.747 | 0.22387 |
| 279.847 | 0.22389 |
| 279.947 | 0.22449 |
| 280.047 | 0.2253  |

Figure 4e

| Wavelength (nm) | Intensity (a.u.) | Intensity (a.u.) | Intensity (a.u.) | Intensity (a.u.) | Intensity (a.u.) | Intensity (a.u.) | Intensity (a.u.) | Intensity (a.u.) | Intensity (a.u.) |
|-----------------|------------------|------------------|------------------|------------------|------------------|------------------|------------------|------------------|------------------|
| 450.01          | 0.00664          | 0.00496          | 0.00416          | 0.00208          | 0.00955          | 7.47E-05         | 1.77E-04         | 2.02E-04         | 0.00459          |
| 450.8           | 0.00716          | 0.00501          | 0.00451          | 0.00224          | 0.01014          | 9.33E-05         | 1.59E-04         | 2.21E-04         | 0.00448          |
| 451.6           | 0.0077           | 0.00525          | 0.00472          | 0.00232          | 0.01085          | 1.12E-04         | 1.59E-04         | 2.39E-04         | 0.0045           |
| 452.39          | 0.00836          | 0.00572          | 0.00512          | 0.0027           | 0.01178          | 1.87E-04         | 1.77E-04         | 1.84E-04         | 0.00456          |
| 453.18          | 0.00912          | 0.00572          | 0.00533          | 0.00273          | 0.01251          | 1.87E-04         | 2.48E-04         | 2.94E-04         | 0.00484          |
| 453.97          | 0.0097           | 0.00611          | 0.00556          | 0.00295          | 0.01359          | 2.05E-04         | 1.59E-04         | 2.94E-04         | 0.00476          |
| 454.77          | 0.01061          | 0.00637          | 0.006            | 0.00338          | 0.01457          | 3.17E-04         | 2.83E-04         | 4.23E-04         | 0.00476          |
| 455.56          | 0.01165          | 0.00676          | 0.00644          | 0.00348          | 0.01551          | 1.49E-04         | 2.12E-04         | 4.41E-04         | 0.00484          |
| 456.35          | 0.01285          | 0.0072           | 0.00725          | 0.00387          | 0.01686          | 3.55E-04         | 4.07E-04         | 3.86E-04         | 0.00491          |
| 457.14          | 0.01396          | 0.00778          | 0.00754          | 0.00433          | 0.01806          | 3.36E-04         | 3.36E-04         | 5.15E-04         | 0.00482          |
| 457.94          | 0.01512          | 0.00839          | 0.00811          | 0.00473          | 0.0195           | 4.11E-04         | 4.25E-04         | 5.70E-04         | 0.00489          |
| 458.73          | 0.01674          | 0.0088           | 0.00879          | 0.0052           | 0.02109          | 3.36E-04         | 4.60E-04         | 5.52E-04         | 0.00518          |
| 459.52          | 0.01817          | 0.00947          | 0.00933          | 0.00555          | 0.02275          | 3.92E-04         | 4.95E-04         | 6.80E-04         | 0.0051           |
| 460.31          | 0.01993          | 0.01064          | 0.01025          | 0.00623          | 0.02518          | 5.97E-04         | 5.31E-04         | 9.01E-04         | 0.0051           |
| 461.1           | 0.0219           | 0.01114          | 0.01118          | 0.00667          | 0.02634          | 5.04E-04         | 5.84E-04         | 8.09E-04         | 0.00533          |
| 461.89          | 0.02404          | 0.01225          | 0.01205          | 0.00749          | 0.02899          | 7.28E-04         | 8.14E-04         | 9.74E-04         | 0.00525          |
| 462.69          | 0.02601          | 0.01298          | 0.01309          | 0.00814          | 0.03109          | 6.72E-04         | 6.37E-04         | 0.00103          | 0.00534          |
| 463.48          | 0.02859          | 0.01433          | 0.01419          | 0.00901          | 0.03359          | 7.84E-04         | 9.20E-04         | 0.00118          | 0.00551          |
| 464.27          | 0.03114          | 0.01559          | 0.0156           | 0.00993          | 0.03639          | 8.21E-04         | 0.00101          | 0.0014           | 0.00559          |
| 465.06          | 0.03389          | 0.01691          | 0.01658          | 0.01079          | 0.03922          | 9.52E-04         | 0.00108          | 0.00138          | 0.00557          |
| 465.85          | 0.03673          | 0.01821          | 0.01809          | 0.01184          | 0.043            | 0.00112          | 0.00126          | 0.00164          | 0.00566          |
| 466.64          | 0.0404           | 0.01996          | 0.02004          | 0.01283          | 0.04608          | 0.00129          | 0.00129          | 0.00169          | 0.00593          |
| 467.43          | 0.04441          | 0.02176          | 0.0217           | 0.01428          | 0.0502           | 0.00136          | 0.00161          | 0.00208          | 0.00593          |
| 468.22          | 0.04878          | 0.0238           | 0.02356          | 0.0157           | 0.05461          | 0.00146          | 0.00165          | 0.00219          | 0.00628          |
| 469.01          | 0.05289          | 0.02562          | 0.02558          | 0.01725          | 0.05948          | 0.00166          | 0.00191          | 0.00239          | 0.00628          |
| 469.81          | 0.05761          | 0.02811          | 0.02748          | 0.01864          | 0.06431          | 0.00187          | 0.00203          | 0.00259          | 0.00662          |
| 470.6           | 0.06298          | 0.03017          | 0.02967          | 0.02031          | 0.06996          | 0.00203          | 0.0023           | 0.00281          | 0.00662          |
| 471.39          | 0.0694           | 0.03347          | 0.03235          | 0.02191          | 0.07637          | 0.00231          | 0.0026           | 0.00307          | 0.00694          |
| 472.18          | 0.07541          | 0.03598          | 0.03493          | 0.02406          | 0.08277          | 0.00237          | 0.00271          | 0.00335          | 0.00724          |
| 472.97          | 0.08283          | 0.03917          | 0.03793          | 0.02611          | 0.09039          | 0.00278          | 0.00304          | 0.00382          | 0.00744          |
| 473.76          | 0.09033          | 0.0427           | 0.04099          | 0.02836          | 0.09793          | 0.00308          | 0.00347          | 0.00412          | 0.00773          |
| 474.55          | 0.09825          | 0.04604          | 0.04421          | 0.03109          | 0.10611          | 0.00329          | 0.00386          | 0.00456          | 0.00808          |
| 475.34          | 0.10785          | 0.05029          | 0.04771          | 0.0335           | 0.11594          | 0.00373          | 0.00435          | 0.00482          | 0.00842          |
| 476.13          | 0.11772          | 0.05432          | 0.05099          | 0.03591          | 0.12583          | 0.00405          | 0.00474          | 0.00531          | 0.00866          |
| 476.92          | 0.12871          | 0.05892          | 0.0556           | 0.03917          | 0.13647          | 0.0045           | 0.00536          | 0.00566          | 0.00906          |
| 477.71          | 0.14016          | 0.0641           | 0.0596           | 0.04198          | 0.14763          | 0.00508          | 0.0057           | 0.00631          | 0.00934          |
| 478.5           | 0.15283          | 0.06891          | 0.06472          | 0.04531          | 0.16075          | 0.00543          | 0.00625          | 0.00678          | 0.0099           |
| 479.29          | 0.16702          | 0.07496          | 0.06951          | 0.04947          | 0.17325          | 0.00601          | 0.00695          | 0.00735          | 0.01026          |
| 480.08          | 0.18162          | 0.0812           | 0.07518          | 0.05287          | 0.18656          | 0.00672          | 0.0077           | 0.00822          | 0.01086          |
| 480.87          | 0.19682          | 0.08738          | 0.08083          | 0.05751          | 0.20201          | 0.00709          | 0.00856          | 0.00866          | 0.01144          |

|        |         |         |         |         |         |         |         |         |         |
|--------|---------|---------|---------|---------|---------|---------|---------|---------|---------|
| 481.66 | 0.21294 | 0.09464 | 0.0879  | 0.06164 | 0.21702 | 0.00788 | 0.00906 | 0.00936 | 0.01198 |
| 482.45 | 0.23087 | 0.10368 | 0.09522 | 0.06632 | 0.23309 | 0.00857 | 0.01009 | 0.01006 | 0.01241 |
| 483.24 | 0.24929 | 0.11192 | 0.10392 | 0.07217 | 0.25075 | 0.00937 | 0.01092 | 0.01094 | 0.0133  |
| 484.03 | 0.2689  | 0.12156 | 0.11176 | 0.07763 | 0.26898 | 0.01032 | 0.01203 | 0.01177 | 0.01421 |
| 484.82 | 0.28958 | 0.13238 | 0.12159 | 0.0833  | 0.28742 | 0.01122 | 0.01327 | 0.01281 | 0.01487 |
| 485.61 | 0.31187 | 0.14387 | 0.13143 | 0.09011 | 0.3066  | 0.0124  | 0.01433 | 0.01414 | 0.01613 |
| 486.39 | 0.33409 | 0.15598 | 0.14217 | 0.09755 | 0.32696 | 0.0135  | 0.01554 | 0.01513 | 0.01688 |
| 487.18 | 0.3555  | 0.16951 | 0.15326 | 0.10519 | 0.34672 | 0.01438 | 0.01681 | 0.01677 | 0.01811 |
| 487.97 | 0.38081 | 0.18399 | 0.16529 | 0.11333 | 0.36831 | 0.01572 | 0.01851 | 0.01813 | 0.01948 |
| 488.76 | 0.40425 | 0.19973 | 0.17871 | 0.12302 | 0.38831 | 0.01701 | 0.02033 | 0.01991 | 0.02083 |
| 489.55 | 0.43063 | 0.21642 | 0.19289 | 0.13226 | 0.4107  | 0.01856 | 0.02169 | 0.02164 | 0.02213 |
| 490.34 | 0.45528 | 0.23382 | 0.2084  | 0.14226 | 0.43293 | 0.02007 | 0.02382 | 0.02372 | 0.02337 |
| 491.13 | 0.47978 | 0.25366 | 0.22431 | 0.15412 | 0.45558 | 0.02177 | 0.02562 | 0.02611 | 0.0253  |
| 491.92 | 0.50613 | 0.27375 | 0.24139 | 0.16617 | 0.4781  | 0.02384 | 0.02826 | 0.02892 | 0.0271  |
| 492.7  | 0.53175 | 0.29387 | 0.25867 | 0.17842 | 0.5004  | 0.02569 | 0.03038 | 0.03146 | 0.02909 |
| 493.49 | 0.55623 | 0.31721 | 0.27683 | 0.19231 | 0.52213 | 0.02828 | 0.03274 | 0.03482 | 0.03075 |
| 494.28 | 0.58156 | 0.33928 | 0.29692 | 0.20649 | 0.54544 | 0.03062 | 0.03553 | 0.03771 | 0.03345 |
| 495.07 | 0.60752 | 0.36351 | 0.31651 | 0.22141 | 0.56766 | 0.03321 | 0.03835 | 0.04188 | 0.0358  |
| 495.86 | 0.63164 | 0.38872 | 0.33741 | 0.23801 | 0.58835 | 0.03611 | 0.04172 | 0.04594 | 0.03837 |
| 496.65 | 0.65587 | 0.41322 | 0.35845 | 0.25518 | 0.61022 | 0.03902 | 0.04551 | 0.05067 | 0.04122 |
| 497.43 | 0.67985 | 0.43945 | 0.37955 | 0.27247 | 0.6315  | 0.04283 | 0.04925 | 0.05521 | 0.04424 |
| 498.22 | 0.70305 | 0.46559 | 0.4008  | 0.2912  | 0.65176 | 0.04598 | 0.05335 | 0.06054 | 0.04724 |
| 499.01 | 0.72388 | 0.48961 | 0.42384 | 0.30994 | 0.67224 | 0.05086 | 0.0582  | 0.06679 | 0.05048 |
| 499.8  | 0.74537 | 0.51594 | 0.44673 | 0.33071 | 0.69035 | 0.05541 | 0.06314 | 0.07367 | 0.05444 |
| 500.59 | 0.76687 | 0.54198 | 0.46973 | 0.35032 | 0.71064 | 0.06054 | 0.0694  | 0.08053 | 0.05834 |
| 501.37 | 0.78744 | 0.56857 | 0.49239 | 0.37237 | 0.72862 | 0.06631 | 0.07543 | 0.08775 | 0.0623  |
| 502.16 | 0.80739 | 0.59493 | 0.51632 | 0.39454 | 0.747   | 0.07223 | 0.08202 | 0.097   | 0.06704 |
| 502.95 | 0.82504 | 0.61888 | 0.53904 | 0.41742 | 0.76575 | 0.07877 | 0.08978 | 0.10566 | 0.07124 |
| 503.74 | 0.84402 | 0.64321 | 0.56309 | 0.43974 | 0.781   | 0.08683 | 0.09787 | 0.11509 | 0.07589 |
| 504.52 | 0.86099 | 0.66612 | 0.58666 | 0.4629  | 0.79873 | 0.09478 | 0.10624 | 0.12581 | 0.08092 |
| 505.31 | 0.87673 | 0.68972 | 0.60962 | 0.48718 | 0.81364 | 0.10384 | 0.1164  | 0.13588 | 0.08705 |
| 506.1  | 0.89158 | 0.71251 | 0.63241 | 0.51178 | 0.8276  | 0.11383 | 0.12659 | 0.14815 | 0.09279 |
| 506.88 | 0.90666 | 0.73123 | 0.65431 | 0.53488 | 0.84162 | 0.12464 | 0.13761 | 0.15982 | 0.09866 |
| 507.67 | 0.91615 | 0.75232 | 0.67559 | 0.55766 | 0.8537  | 0.1353  | 0.14954 | 0.17308 | 0.10447 |
| 508.46 | 0.92962 | 0.77086 | 0.6971  | 0.58275 | 0.86512 | 0.14782 | 0.16228 | 0.18725 | 0.11197 |
| 509.24 | 0.93953 | 0.79024 | 0.71749 | 0.60565 | 0.87668 | 0.16136 | 0.17589 | 0.19962 | 0.11822 |
| 510.03 | 0.94995 | 0.80628 | 0.73851 | 0.63093 | 0.8893  | 0.17458 | 0.18934 | 0.21494 | 0.12607 |
| 510.82 | 0.95974 | 0.82641 | 0.7574  | 0.65286 | 0.89793 | 0.19059 | 0.20493 | 0.23    | 0.13311 |
| 511.61 | 0.96692 | 0.83862 | 0.77602 | 0.67538 | 0.90612 | 0.20641 | 0.22039 | 0.24664 | 0.14063 |
| 512.39 | 0.97502 | 0.85453 | 0.79346 | 0.69801 | 0.91682 | 0.22407 | 0.23718 | 0.26281 | 0.14935 |
| 513.18 | 0.98324 | 0.86754 | 0.81123 | 0.72159 | 0.92505 | 0.24261 | 0.25437 | 0.27943 | 0.15823 |
| 513.96 | 0.98669 | 0.88162 | 0.82687 | 0.74149 | 0.93208 | 0.26066 | 0.27282 | 0.29758 | 0.16754 |
| 514.75 | 0.99078 | 0.89474 | 0.84334 | 0.76318 | 0.93997 | 0.28123 | 0.29207 | 0.31626 | 0.17695 |
| 515.54 | 0.99328 | 0.90558 | 0.85896 | 0.78487 | 0.94543 | 0.30183 | 0.31189 | 0.3342  | 0.18606 |

|        |         |         |         |         |         |         |         |         |         |
|--------|---------|---------|---------|---------|---------|---------|---------|---------|---------|
| 516.32 | 0.99587 | 0.91824 | 0.87462 | 0.80452 | 0.95148 | 0.32387 | 0.33222 | 0.35314 | 0.19565 |
| 517.11 | 1       | 0.92782 | 0.88724 | 0.82409 | 0.95825 | 0.3465  | 0.35326 | 0.37136 | 0.2069  |
| 517.89 | 0.99898 | 0.93872 | 0.89982 | 0.84039 | 0.96019 | 0.36965 | 0.37492 | 0.39099 | 0.21775 |
| 518.68 | 0.9988  | 0.94722 | 0.91152 | 0.8553  | 0.9657  | 0.39319 | 0.39575 | 0.41083 | 0.22829 |
| 519.47 | 0.99944 | 0.95396 | 0.92291 | 0.87319 | 0.97122 | 0.41728 | 0.41751 | 0.43008 | 0.24101 |
| 520.25 | 0.99966 | 0.96395 | 0.9334  | 0.8873  | 0.97615 | 0.44269 | 0.4414  | 0.45187 | 0.2514  |
| 521.04 | 0.99789 | 0.97115 | 0.9434  | 0.90334 | 0.97967 | 0.46834 | 0.46398 | 0.47189 | 0.26391 |
| 521.82 | 0.99737 | 0.9778  | 0.95229 | 0.91624 | 0.98407 | 0.49395 | 0.48771 | 0.49206 | 0.27701 |
| 522.61 | 0.99623 | 0.98296 | 0.96049 | 0.92943 | 0.98725 | 0.51951 | 0.5108  | 0.51248 | 0.28926 |
| 523.39 | 0.99184 | 0.98936 | 0.96789 | 0.94167 | 0.98941 | 0.54649 | 0.53497 | 0.52993 | 0.30227 |
| 524.18 | 0.98839 | 0.99087 | 0.97407 | 0.9508  | 0.99156 | 0.57044 | 0.55741 | 0.55107 | 0.31765 |
| 524.97 | 0.9855  | 0.99376 | 0.98138 | 0.96119 | 0.99371 | 0.5957  | 0.58165 | 0.57209 | 0.33156 |
| 525.75 | 0.98219 | 0.99868 | 0.98607 | 0.96947 | 0.9966  | 0.62311 | 0.60522 | 0.59253 | 0.34495 |
| 526.54 | 0.9766  | 0.99913 | 0.98988 | 0.9745  | 0.99816 | 0.6471  | 0.62715 | 0.6113  | 0.36018 |
| 527.32 | 0.96886 | 0.99976 | 0.9931  | 0.98085 | 0.99759 | 0.67107 | 0.64982 | 0.62936 | 0.37389 |
| 528.11 | 0.96521 | 1       | 0.99619 | 0.9865  | 1       | 0.69519 | 0.67213 | 0.64796 | 0.38998 |
| 528.89 | 0.95743 | 0.99918 | 0.99709 | 0.99142 | 0.99789 | 0.71826 | 0.69437 | 0.6669  | 0.40455 |
| 529.67 | 0.95059 | 0.99701 | 0.99803 | 0.99519 | 0.99749 | 0.73934 | 0.71605 | 0.68563 | 0.41966 |
| 530.46 | 0.94466 | 0.99629 | 1       | 0.99722 | 0.9975  | 0.761   | 0.73737 | 0.70266 | 0.43523 |
| 531.24 | 0.93538 | 0.99454 | 0.99758 | 0.99778 | 0.99796 | 0.7808  | 0.75307 | 0.71884 | 0.45062 |
| 532.03 | 0.92742 | 0.9907  | 0.99698 | 1       | 0.99766 | 0.79998 | 0.77458 | 0.73487 | 0.46688 |
| 532.81 | 0.91771 | 0.98567 | 0.99632 | 0.99688 | 0.99406 | 0.81962 | 0.79249 | 0.75138 | 0.4813  |
| 533.6  | 0.91081 | 0.98147 | 0.99368 | 0.99671 | 0.99243 | 0.83724 | 0.81164 | 0.7662  | 0.4976  |
| 534.38 | 0.90422 | 0.97635 | 0.98958 | 0.99568 | 0.98929 | 0.853   | 0.82714 | 0.77984 | 0.51298 |
| 535.17 | 0.89263 | 0.97102 | 0.98782 | 0.99435 | 0.987   | 0.86769 | 0.84382 | 0.7932  | 0.5277  |
| 535.95 | 0.88421 | 0.96363 | 0.98417 | 0.98862 | 0.98374 | 0.88317 | 0.85798 | 0.80771 | 0.54433 |
| 536.73 | 0.87671 | 0.95864 | 0.98079 | 0.98626 | 0.98134 | 0.89665 | 0.87192 | 0.82007 | 0.55958 |
| 537.52 | 0.86662 | 0.95025 | 0.97444 | 0.98118 | 0.97974 | 0.90998 | 0.88571 | 0.83362 | 0.57565 |
| 538.3  | 0.8569  | 0.94312 | 0.96973 | 0.97928 | 0.977   | 0.92159 | 0.90041 | 0.84402 | 0.59086 |
| 539.09 | 0.84569 | 0.93475 | 0.96461 | 0.97273 | 0.97277 | 0.93315 | 0.9131  | 0.85505 | 0.60543 |
| 539.87 | 0.83833 | 0.92871 | 0.9587  | 0.968   | 0.96706 | 0.94102 | 0.92258 | 0.86478 | 0.62058 |
| 540.65 | 0.83051 | 0.91811 | 0.95291 | 0.9616  | 0.96425 | 0.95055 | 0.93184 | 0.87533 | 0.63708 |
| 541.44 | 0.81926 | 0.91139 | 0.94745 | 0.95705 | 0.95933 | 0.95732 | 0.94238 | 0.88576 | 0.65195 |
| 542.22 | 0.81084 | 0.90395 | 0.94029 | 0.94995 | 0.95574 | 0.96541 | 0.94991 | 0.89335 | 0.6651  |
| 543    | 0.80236 | 0.89463 | 0.93345 | 0.94235 | 0.95333 | 0.9702  | 0.95875 | 0.90243 | 0.68034 |
| 543.79 | 0.79145 | 0.88507 | 0.92796 | 0.93676 | 0.94569 | 0.97707 | 0.96511 | 0.90942 | 0.69486 |
| 544.57 | 0.78361 | 0.87471 | 0.92178 | 0.92887 | 0.9404  | 0.98243 | 0.97208 | 0.91703 | 0.70881 |
| 545.35 | 0.77535 | 0.86493 | 0.9154  | 0.92095 | 0.9363  | 0.9846  | 0.9774  | 0.92477 | 0.72177 |
| 546.14 | 0.7644  | 0.85962 | 0.90706 | 0.91426 | 0.9325  | 0.98934 | 0.98238 | 0.93016 | 0.73548 |
| 546.92 | 0.75434 | 0.84913 | 0.90134 | 0.90708 | 0.92671 | 0.99233 | 0.98666 | 0.93727 | 0.74804 |
| 547.7  | 0.74533 | 0.84048 | 0.89319 | 0.90134 | 0.92319 | 0.99591 | 0.98891 | 0.94442 | 0.76169 |
| 548.49 | 0.73819 | 0.83045 | 0.88629 | 0.89324 | 0.91683 | 0.998   | 0.99283 | 0.94858 | 0.77392 |
| 549.27 | 0.72855 | 0.82136 | 0.87969 | 0.88505 | 0.91051 | 0.99673 | 0.99526 | 0.95503 | 0.78654 |
| 550.05 | 0.71933 | 0.81395 | 0.87283 | 0.87624 | 0.90366 | 0.99834 | 0.99676 | 0.95862 | 0.79809 |

|        |         |         |         |         |         |         |         |         |         |
|--------|---------|---------|---------|---------|---------|---------|---------|---------|---------|
| 550.83 | 0.71125 | 0.80485 | 0.8658  | 0.86953 | 0.89737 | 0.99755 | 0.99597 | 0.96349 | 0.80831 |
| 551.62 | 0.70272 | 0.79479 | 0.85973 | 0.86122 | 0.89372 | 1       | 0.99839 | 0.96876 | 0.81876 |
| 552.4  | 0.69402 | 0.78651 | 0.85152 | 0.85233 | 0.88663 | 0.99968 | 0.99857 | 0.97178 | 0.83063 |
| 553.18 | 0.68642 | 0.77927 | 0.84618 | 0.84733 | 0.88122 | 0.99909 | 0.99798 | 0.97496 | 0.84178 |
| 553.96 | 0.67919 | 0.77246 | 0.83788 | 0.83933 | 0.87524 | 0.9981  | 1       | 0.97926 | 0.85386 |
| 554.75 | 0.67249 | 0.76199 | 0.8323  | 0.83182 | 0.87082 | 0.99666 | 0.99681 | 0.98404 | 0.86322 |
| 555.53 | 0.66485 | 0.75393 | 0.82523 | 0.826   | 0.86432 | 0.99658 | 0.99549 | 0.98803 | 0.87441 |
| 556.31 | 0.65693 | 0.74699 | 0.81941 | 0.81687 | 0.85836 | 0.99604 | 0.99579 | 0.9897  | 0.88342 |
| 557.09 | 0.64819 | 0.73943 | 0.81172 | 0.80919 | 0.85188 | 0.99279 | 0.99414 | 0.99121 | 0.89283 |
| 557.87 | 0.63892 | 0.73236 | 0.80483 | 0.8008  | 0.84537 | 0.98811 | 0.99052 | 0.99513 | 0.89902 |
| 558.66 | 0.63443 | 0.72293 | 0.79799 | 0.79528 | 0.83843 | 0.98421 | 0.988   | 0.99553 | 0.90766 |
| 559.44 | 0.62394 | 0.71372 | 0.79146 | 0.78878 | 0.83164 | 0.98098 | 0.98768 | 0.99581 | 0.91678 |
| 560.22 | 0.61556 | 0.70646 | 0.78455 | 0.77777 | 0.82318 | 0.97849 | 0.98101 | 0.99776 | 0.92383 |
| 561    | 0.60865 | 0.70008 | 0.77804 | 0.77168 | 0.81724 | 0.97426 | 0.97841 | 0.99816 | 0.92938 |
| 561.78 | 0.60061 | 0.69141 | 0.77019 | 0.763   | 0.81123 | 0.96977 | 0.97524 | 1       | 0.93618 |
| 562.56 | 0.59375 | 0.68268 | 0.76314 | 0.75622 | 0.80377 | 0.96563 | 0.97073 | 0.99915 | 0.94164 |
| 563.34 | 0.58577 | 0.67381 | 0.75651 | 0.74791 | 0.79747 | 0.9619  | 0.96557 | 0.99847 | 0.94751 |
| 564.13 | 0.57827 | 0.66907 | 0.75051 | 0.73893 | 0.78981 | 0.95669 | 0.96311 | 0.99844 | 0.95297 |
| 564.91 | 0.56941 | 0.65933 | 0.74174 | 0.73122 | 0.78204 | 0.95208 | 0.95764 | 0.99822 | 0.95781 |
| 565.69 | 0.56233 | 0.65352 | 0.7354  | 0.72526 | 0.77385 | 0.9461  | 0.95307 | 0.99857 | 0.96435 |
| 566.47 | 0.55325 | 0.64605 | 0.7287  | 0.71688 | 0.76816 | 0.94099 | 0.94934 | 0.99893 | 0.96812 |
| 567.25 | 0.54595 | 0.63787 | 0.72163 | 0.70984 | 0.76087 | 0.93481 | 0.94605 | 0.99614 | 0.97266 |
| 568.03 | 0.54053 | 0.63154 | 0.71502 | 0.70304 | 0.75395 | 0.92995 | 0.94122 | 0.99678 | 0.97819 |
| 568.81 | 0.53267 | 0.62604 | 0.70854 | 0.6938  | 0.74558 | 0.92353 | 0.93589 | 0.99465 | 0.97935 |
| 569.59 | 0.52307 | 0.61557 | 0.70003 | 0.68571 | 0.7386  | 0.9167  | 0.93094 | 0.99279 | 0.98344 |
| 570.37 | 0.51639 | 0.60995 | 0.6934  | 0.67895 | 0.73146 | 0.91201 | 0.92628 | 0.99152 | 0.98511 |
| 571.15 | 0.50773 | 0.60328 | 0.68693 | 0.66932 | 0.72378 | 0.9052  | 0.92115 | 0.98959 | 0.99027 |
| 571.93 | 0.50318 | 0.59485 | 0.68031 | 0.66236 | 0.71766 | 0.89769 | 0.91678 | 0.98827 | 0.98974 |
| 572.71 | 0.49381 | 0.58815 | 0.67157 | 0.65601 | 0.70907 | 0.89332 | 0.91041 | 0.98606 | 0.99338 |
| 573.5  | 0.48836 | 0.57993 | 0.66561 | 0.64721 | 0.70297 | 0.8864  | 0.90565 | 0.98327 | 0.99376 |
| 574.28 | 0.48002 | 0.57228 | 0.65882 | 0.6405  | 0.69583 | 0.87996 | 0.90029 | 0.9802  | 0.99546 |
| 575.06 | 0.47176 | 0.5679  | 0.65206 | 0.63226 | 0.68857 | 0.87404 | 0.89556 | 0.97865 | 0.99692 |
| 575.84 | 0.46598 | 0.55934 | 0.64499 | 0.62338 | 0.68111 | 0.8665  | 0.8907  | 0.9775  | 0.99801 |
| 576.62 | 0.45935 | 0.55104 | 0.63838 | 0.61663 | 0.67319 | 0.85989 | 0.88284 | 0.9734  | 0.99788 |
| 577.4  | 0.45319 | 0.54544 | 0.62994 | 0.61053 | 0.66616 | 0.85318 | 0.87983 | 0.97047 | 1       |
| 578.18 | 0.44461 | 0.53775 | 0.62266 | 0.60108 | 0.6594  | 0.84639 | 0.87435 | 0.96913 | 0.99871 |
| 578.96 | 0.43809 | 0.53201 | 0.61601 | 0.59412 | 0.65099 | 0.83969 | 0.86775 | 0.96373 | 0.99902 |
| 579.73 | 0.43051 | 0.52331 | 0.60927 | 0.58618 | 0.6432  | 0.83332 | 0.86288 | 0.96056 | 0.99946 |
| 580.51 | 0.42398 | 0.51644 | 0.60299 | 0.5776  | 0.63727 | 0.82632 | 0.85648 | 0.95847 | 0.99844 |
| 581.29 | 0.4178  | 0.5084  | 0.59511 | 0.57077 | 0.63119 | 0.81799 | 0.85207 | 0.95569 | 0.99659 |
| 582.07 | 0.41191 | 0.50209 | 0.58902 | 0.56316 | 0.62365 | 0.81125 | 0.84719 | 0.95194 | 0.99871 |
| 582.85 | 0.40507 | 0.49789 | 0.58201 | 0.55703 | 0.61519 | 0.80405 | 0.84205 | 0.94655 | 0.99458 |
| 583.63 | 0.39855 | 0.48729 | 0.57564 | 0.54978 | 0.60958 | 0.79761 | 0.83593 | 0.94398 | 0.99477 |
| 584.41 | 0.39226 | 0.48323 | 0.56748 | 0.54145 | 0.60079 | 0.79234 | 0.8303  | 0.94025 | 0.99334 |

|        |         |         |         |         |         |         |         |         |         |
|--------|---------|---------|---------|---------|---------|---------|---------|---------|---------|
| 585.19 | 0.38608 | 0.47539 | 0.5613  | 0.53418 | 0.59341 | 0.78461 | 0.8256  | 0.93589 | 0.99111 |
| 585.97 | 0.3792  | 0.46851 | 0.55507 | 0.52794 | 0.58663 | 0.77709 | 0.81863 | 0.92993 | 0.98847 |
| 586.75 | 0.37337 | 0.46177 | 0.54686 | 0.52041 | 0.58062 | 0.76919 | 0.81261 | 0.92534 | 0.98547 |
| 587.53 | 0.36691 | 0.45616 | 0.54084 | 0.51292 | 0.5723  | 0.76255 | 0.80672 | 0.92188 | 0.98404 |
| 588.31 | 0.3616  | 0.44857 | 0.53307 | 0.50601 | 0.567   | 0.75506 | 0.80038 | 0.91841 | 0.97952 |
| 589.08 | 0.35705 | 0.44218 | 0.52765 | 0.49899 | 0.56024 | 0.74798 | 0.79568 | 0.9139  | 0.97868 |
| 589.86 | 0.34961 | 0.43565 | 0.52135 | 0.49212 | 0.55388 | 0.74083 | 0.78814 | 0.9083  | 0.97547 |
| 590.64 | 0.3451  | 0.42963 | 0.51539 | 0.48527 | 0.54625 | 0.73415 | 0.78476 | 0.90486 | 0.97219 |
| 591.42 | 0.33898 | 0.42403 | 0.5087  | 0.47809 | 0.5384  | 0.72814 | 0.77779 | 0.89861 | 0.96771 |
| 592.2  | 0.33335 | 0.41614 | 0.50182 | 0.47068 | 0.53204 | 0.7203  | 0.76943 | 0.89368 | 0.96469 |
| 592.98 | 0.32663 | 0.41105 | 0.49437 | 0.46454 | 0.52606 | 0.7127  | 0.7668  | 0.88978 | 0.96159 |
| 593.76 | 0.323   | 0.40448 | 0.48926 | 0.45826 | 0.52033 | 0.70723 | 0.75975 | 0.8864  | 0.95796 |
| 594.53 | 0.31765 | 0.3988  | 0.48175 | 0.45186 | 0.51463 | 0.6995  | 0.75308 | 0.88077 | 0.95293 |
| 595.31 | 0.31297 | 0.39217 | 0.47693 | 0.44529 | 0.50681 | 0.69282 | 0.74682 | 0.87458 | 0.94905 |
| 596.09 | 0.3085  | 0.38788 | 0.47096 | 0.43853 | 0.50092 | 0.68652 | 0.74135 | 0.86855 | 0.94509 |
| 596.87 | 0.30265 | 0.38066 | 0.46466 | 0.43249 | 0.49456 | 0.67754 | 0.73516 | 0.8634  | 0.94166 |
| 597.65 | 0.29788 | 0.37557 | 0.45945 | 0.42532 | 0.48851 | 0.67067 | 0.72852 | 0.85901 | 0.93705 |
| 598.42 | 0.29186 | 0.36924 | 0.4521  | 0.41954 | 0.48071 | 0.6644  | 0.72208 | 0.85309 | 0.93326 |
| 599.2  | 0.28833 | 0.36406 | 0.44686 | 0.41363 | 0.4761  | 0.65731 | 0.71619 | 0.84788 | 0.92775 |
| 599.98 | 0.28332 | 0.35914 | 0.44203 | 0.40827 | 0.46912 | 0.65174 | 0.70964 | 0.84136 | 0.92321 |
| 600.76 | 0.27935 | 0.35177 | 0.43429 | 0.40134 | 0.46304 | 0.64258 | 0.70566 | 0.83492 | 0.91696 |
| 601.53 | 0.27361 | 0.34687 | 0.42799 | 0.39535 | 0.45662 | 0.63707 | 0.6989  | 0.82986 | 0.91066 |
| 602.31 | 0.26942 | 0.34184 | 0.42145 | 0.38977 | 0.45056 | 0.63044 | 0.69209 | 0.82391 | 0.90759 |
| 603.09 | 0.26491 | 0.33718 | 0.41668 | 0.38443 | 0.44439 | 0.62368 | 0.6846  | 0.81711 | 0.89973 |
| 603.87 | 0.26038 | 0.33176 | 0.41122 | 0.37793 | 0.43832 | 0.61569 | 0.67747 | 0.80911 | 0.89598 |
| 604.64 | 0.25587 | 0.32625 | 0.40592 | 0.37331 | 0.43221 | 0.60869 | 0.67307 | 0.80571 | 0.88957 |
| 605.42 | 0.2523  | 0.32127 | 0.4004  | 0.36663 | 0.42598 | 0.60098 | 0.66652 | 0.79973 | 0.88548 |
| 606.2  | 0.24919 | 0.31697 | 0.39519 | 0.36146 | 0.42047 | 0.59566 | 0.66034 | 0.7935  | 0.87912 |
| 606.97 | 0.24482 | 0.31223 | 0.3892  | 0.3565  | 0.41675 | 0.58803 | 0.65442 | 0.78773 | 0.87158 |
| 607.75 | 0.24037 | 0.30759 | 0.38561 | 0.35131 | 0.40973 | 0.58198 | 0.64746 | 0.78293 | 0.86871 |
| 608.53 | 0.23604 | 0.30239 | 0.37936 | 0.34566 | 0.40378 | 0.57544 | 0.64206 | 0.77408 | 0.86142 |
| 609.3  | 0.23195 | 0.29673 | 0.37536 | 0.34061 | 0.39954 | 0.56921 | 0.63584 | 0.76943 | 0.85699 |
| 610.08 | 0.22858 | 0.29374 | 0.36953 | 0.33551 | 0.39358 | 0.56131 | 0.62916 | 0.76224 | 0.85105 |
| 610.86 | 0.22573 | 0.28851 | 0.36401 | 0.3288  | 0.3872  | 0.55532 | 0.6238  | 0.75375 | 0.84492 |
| 611.63 | 0.22156 | 0.28546 | 0.35955 | 0.32602 | 0.38266 | 0.55007 | 0.61899 | 0.74857 | 0.84124 |
| 612.41 | 0.21797 | 0.2798  | 0.35564 | 0.32167 | 0.37769 | 0.54404 | 0.6126  | 0.74494 | 0.83672 |
| 613.19 | 0.21491 | 0.27644 | 0.35131 | 0.31714 | 0.37302 | 0.53713 | 0.60816 | 0.74072 | 0.83005 |
| 613.96 | 0.21072 | 0.27386 | 0.34694 | 0.3132  | 0.36715 | 0.53293 | 0.60331 | 0.73494 | 0.82643 |
| 614.74 | 0.20831 | 0.26892 | 0.34216 | 0.30738 | 0.36285 | 0.52683 | 0.59668 | 0.72963 | 0.82134 |
| 615.51 | 0.2047  | 0.26439 | 0.33744 | 0.30397 | 0.35692 | 0.51988 | 0.59112 | 0.7225  | 0.81446 |
| 616.29 | 0.20135 | 0.26042 | 0.33376 | 0.29892 | 0.35292 | 0.51462 | 0.58502 | 0.71799 | 0.80884 |
| 617.07 | 0.19772 | 0.25676 | 0.32987 | 0.29475 | 0.34823 | 0.50739 | 0.57967 | 0.71203 | 0.8019  |
| 617.84 | 0.19417 | 0.25264 | 0.32488 | 0.2911  | 0.34237 | 0.50256 | 0.5742  | 0.70545 | 0.79528 |
| 618.62 | 0.19233 | 0.2496  | 0.31978 | 0.28533 | 0.33732 | 0.49563 | 0.56778 | 0.69911 | 0.78765 |

|        |         |         |         |         |         |         |         |         |         |
|--------|---------|---------|---------|---------|---------|---------|---------|---------|---------|
| 619.39 | 0.18862 | 0.24564 | 0.31546 | 0.28134 | 0.33282 | 0.48936 | 0.56276 | 0.69257 | 0.78129 |
| 620.17 | 0.18451 | 0.2408  | 0.31129 | 0.27702 | 0.32837 | 0.4818  | 0.55663 | 0.68615 | 0.77531 |
| 620.94 | 0.18186 | 0.23673 | 0.30679 | 0.27224 | 0.32303 | 0.47614 | 0.55002 | 0.67955 | 0.76951 |
| 621.72 | 0.17809 | 0.23372 | 0.30155 | 0.26818 | 0.31785 | 0.47013 | 0.54294 | 0.67344 | 0.76164 |
| 622.49 | 0.17563 | 0.22981 | 0.29748 | 0.26366 | 0.31353 | 0.46402 | 0.53892 | 0.66736 | 0.75732 |
| 623.27 | 0.17296 | 0.22708 | 0.29418 | 0.26088 | 0.30932 | 0.4604  | 0.53434 | 0.66225 | 0.75232 |
| 624.05 | 0.17029 | 0.22385 | 0.29076 | 0.25653 | 0.30572 | 0.45549 | 0.52883 | 0.65727 | 0.7448  |
| 624.82 | 0.16791 | 0.22077 | 0.28709 | 0.25375 | 0.30163 | 0.44942 | 0.52574 | 0.65272 | 0.74005 |
| 625.6  | 0.16542 | 0.21739 | 0.28369 | 0.25112 | 0.2987  | 0.44453 | 0.52066 | 0.64734 | 0.73549 |
| 626.37 | 0.16337 | 0.21512 | 0.28048 | 0.24716 | 0.29355 | 0.43931 | 0.51744 | 0.64315 | 0.73075 |
| 627.15 | 0.16105 | 0.21286 | 0.2783  | 0.24438 | 0.29189 | 0.43589 | 0.51307 | 0.63903 | 0.72526 |
| 627.92 | 0.15846 | 0.20998 | 0.27379 | 0.24049 | 0.28719 | 0.43049 | 0.50742 | 0.63401 | 0.72074 |
| 628.69 | 0.15578 | 0.20703 | 0.27112 | 0.2375  | 0.28353 | 0.42583 | 0.50406 | 0.62798 | 0.71344 |
| 629.47 | 0.15299 | 0.20439 | 0.2673  | 0.23359 | 0.27929 | 0.42066 | 0.49789 | 0.62276 | 0.70934 |
| 630.24 | 0.15154 | 0.20129 | 0.26283 | 0.22977 | 0.27483 | 0.41569 | 0.49314 | 0.61801 | 0.7021  |
| 631.02 | 0.14848 | 0.19747 | 0.2597  | 0.22712 | 0.27138 | 0.40902 | 0.48861 | 0.61042 | 0.69461 |
| 631.79 | 0.14629 | 0.19429 | 0.25667 | 0.22243 | 0.26827 | 0.40613 | 0.48269 | 0.60638 | 0.68916 |
| 632.57 | 0.1436  | 0.19136 | 0.25228 | 0.21931 | 0.26362 | 0.39939 | 0.47747 | 0.60136 | 0.68323 |
| 633.34 | 0.14134 | 0.18872 | 0.24939 | 0.2167  | 0.26012 | 0.39482 | 0.4732  | 0.59411 | 0.67665 |
| 634.12 | 0.13925 | 0.1857  | 0.24419 | 0.21286 | 0.25523 | 0.38983 | 0.46837 | 0.58954 | 0.67035 |
| 634.89 | 0.13631 | 0.18247 | 0.24149 | 0.20956 | 0.25192 | 0.38419 | 0.46278 | 0.58145 | 0.66448 |
| 635.66 | 0.13464 | 0.17972 | 0.23867 | 0.20712 | 0.24766 | 0.37915 | 0.45874 | 0.57551 | 0.65793 |
| 636.44 | 0.13167 | 0.17681 | 0.23465 | 0.20313 | 0.24409 | 0.37284 | 0.45282 | 0.57098 | 0.6509  |
| 637.21 | 0.12953 | 0.1733  | 0.23147 | 0.1992  | 0.23927 | 0.36853 | 0.44818 | 0.564   | 0.644   |
| 637.98 | 0.12758 | 0.17166 | 0.22796 | 0.19647 | 0.23601 | 0.36358 | 0.44367 | 0.55854 | 0.63956 |
| 638.76 | 0.12486 | 0.16871 | 0.22512 | 0.19306 | 0.23262 | 0.35824 | 0.43678 | 0.55203 | 0.63247 |
| 639.53 | 0.12317 | 0.166   | 0.22116 | 0.19043 | 0.22908 | 0.35333 | 0.43383 | 0.54635 | 0.62604 |
| 640.31 | 0.12129 | 0.16292 | 0.21717 | 0.18647 | 0.22531 | 0.34882 | 0.42771 | 0.54116 | 0.6182  |
| 641.08 | 0.11884 | 0.16006 | 0.21428 | 0.18352 | 0.22239 | 0.34407 | 0.42431 | 0.53565 | 0.61117 |
| 641.85 | 0.11626 | 0.15809 | 0.21158 | 0.18042 | 0.21787 | 0.33868 | 0.41884 | 0.52813 | 0.60406 |
| 642.63 | 0.11475 | 0.15507 | 0.20824 | 0.17815 | 0.2155  | 0.33424 | 0.41325 | 0.523   | 0.59856 |
| 643.4  | 0.11311 | 0.15314 | 0.20498 | 0.1754  | 0.21111 | 0.32899 | 0.40854 | 0.51763 | 0.59166 |
| 644.17 | 0.11036 | 0.1502  | 0.20161 | 0.17292 | 0.20877 | 0.32494 | 0.40426 | 0.51042 | 0.58542 |
| 644.94 | 0.1094  | 0.14762 | 0.19944 | 0.16953 | 0.2048  | 0.32098 | 0.40039 | 0.50553 | 0.57891 |
| 645.72 | 0.10669 | 0.14506 | 0.1961  | 0.16622 | 0.20236 | 0.31534 | 0.39511 | 0.50081 | 0.57308 |
| 646.49 | 0.10497 | 0.14311 | 0.1931  | 0.1641  | 0.19846 | 0.31025 | 0.39133 | 0.49443 | 0.56674 |
| 647.26 | 0.10366 | 0.14014 | 0.1901  | 0.16113 | 0.1961  | 0.30715 | 0.38533 | 0.48915 | 0.5614  |
| 648.04 | 0.10154 | 0.13832 | 0.18707 | 0.15934 | 0.19279 | 0.30268 | 0.38066 | 0.48305 | 0.55495 |
| 648.81 | 0.09981 | 0.13632 | 0.1841  | 0.156   | 0.19019 | 0.29867 | 0.37583 | 0.47981 | 0.54799 |
| 649.58 | 0.09843 | 0.13368 | 0.18091 | 0.15349 | 0.18718 | 0.29342 | 0.37225 | 0.47218 | 0.54259 |
| 650.35 | 0.0964  | 0.13171 | 0.17845 | 0.15065 | 0.18403 | 0.28945 | 0.36822 | 0.46681 | 0.53706 |
| 651.13 | 0.09426 | 0.12928 | 0.1755  | 0.1477  | 0.1803  | 0.28435 | 0.36349 | 0.46128 | 0.52841 |
| 651.9  | 0.09268 | 0.12672 | 0.17285 | 0.14543 | 0.17704 | 0.28058 | 0.35748 | 0.45441 | 0.52089 |
| 652.67 | 0.09059 | 0.12427 | 0.17015 | 0.14253 | 0.1743  | 0.27602 | 0.35372 | 0.44944 | 0.51481 |



|        |         |         |         |         |         |         |         |         |         |
|--------|---------|---------|---------|---------|---------|---------|---------|---------|---------|
| 653.44 | 0.08901 | 0.12182 | 0.16764 | 0.14036 | 0.17202 | 0.27253 | 0.34877 | 0.44409 | 0.51065 |
| 654.21 | 0.088   | 0.11974 | 0.16405 | 0.1389  | 0.16905 | 0.26772 | 0.3458  | 0.43874 | 0.50473 |
| 654.99 | 0.08652 | 0.11842 | 0.16284 | 0.13577 | 0.16618 | 0.26471 | 0.34205 | 0.43464 | 0.49897 |
| 655.76 | 0.0853  | 0.11679 | 0.15977 | 0.13441 | 0.1637  | 0.26055 | 0.33783 | 0.42959 | 0.49389 |
| 656.53 | 0.08375 | 0.11454 | 0.15731 | 0.13164 | 0.1612  | 0.25754 | 0.33313 | 0.42468 | 0.4882  |
| 657.3  | 0.08231 | 0.11293 | 0.15491 | 0.1292  | 0.15838 | 0.25368 | 0.32975 | 0.42043 | 0.48127 |
| 658.07 | 0.08062 | 0.11068 | 0.15298 | 0.12695 | 0.15607 | 0.24951 | 0.32534 | 0.41519 | 0.4771  |
| 658.84 | 0.07898 | 0.1091  | 0.15101 | 0.12514 | 0.15401 | 0.24638 | 0.32184 | 0.41056 | 0.47232 |
| 659.62 | 0.07808 | 0.10715 | 0.14852 | 0.12345 | 0.15087 | 0.24468 | 0.31849 | 0.40554 | 0.46593 |
| 660.39 | 0.07665 | 0.10578 | 0.14636 | 0.12166 | 0.14885 | 0.23975 | 0.31418 | 0.40061 | 0.46002 |
| 661.16 | 0.07563 | 0.10437 | 0.14399 | 0.11946 | 0.14685 | 0.23645 | 0.31072 | 0.39646 | 0.45544 |
| 661.93 | 0.07441 | 0.10242 | 0.14196 | 0.11736 | 0.14498 | 0.23344 | 0.30726 | 0.39206 | 0.45038 |
| 662.7  | 0.07297 | 0.10123 | 0.13955 | 0.1154  | 0.14209 | 0.22931 | 0.30379 | 0.38682 | 0.44393 |
| 663.47 | 0.07122 | 0.09921 | 0.13797 | 0.11357 | 0.13951 | 0.22706 | 0.30057 | 0.38212 | 0.43935 |
| 664.24 | 0.0703  | 0.09722 | 0.13503 | 0.11169 | 0.13744 | 0.22203 | 0.29613 | 0.37838 | 0.43318 |
| 665.01 | 0.0695  | 0.09583 | 0.13276 | 0.10976 | 0.13467 | 0.21959 | 0.29236 | 0.3736  | 0.42718 |
| 665.79 | 0.06785 | 0.09384 | 0.13133 | 0.10773 | 0.13283 | 0.21636 | 0.28855 | 0.36858 | 0.4233  |
| 666.56 | 0.06695 | 0.09262 | 0.12869 | 0.10645 | 0.13023 | 0.21378 | 0.28507 | 0.3641  | 0.41856 |
| 667.33 | 0.06553 | 0.09065 | 0.12671 | 0.10408 | 0.12807 | 0.20997 | 0.28169 | 0.35912 | 0.41209 |
| 668.1  | 0.06428 | 0.08931 | 0.12475 | 0.10248 | 0.12651 | 0.20624 | 0.27797 | 0.35577 | 0.40729 |
| 668.87 | 0.06326 | 0.0877  | 0.12301 | 0.10021 | 0.12417 | 0.20349 | 0.27516 | 0.34998 | 0.40095 |
| 669.64 | 0.06246 | 0.0864  | 0.12041 | 0.09893 | 0.1216  | 0.20088 | 0.27093 | 0.34582 | 0.39643 |
| 670.41 | 0.06134 | 0.08484 | 0.11943 | 0.09765 | 0.12003 | 0.1976  | 0.2678  | 0.34152 | 0.39272 |
| 671.18 | 0.06055 | 0.08309 | 0.1176  | 0.09553 | 0.11767 | 0.19414 | 0.26463 | 0.33694 | 0.38623 |
| 671.95 | 0.05909 | 0.08215 | 0.11524 | 0.09412 | 0.11614 | 0.19164 | 0.26088 | 0.3338  | 0.38205 |
| 672.72 | 0.05841 | 0.08096 | 0.11464 | 0.09285 | 0.11393 | 0.18863 | 0.25743 | 0.32922 | 0.37747 |
| 673.49 | 0.05702 | 0.07925 | 0.1118  | 0.09103 | 0.11225 | 0.1857  | 0.25465 | 0.32437 | 0.37229 |
| 674.26 | 0.05624 | 0.07871 | 0.11017 | 0.08935 | 0.11034 | 0.18316 | 0.25169 | 0.32121 | 0.36734 |
| 675.03 | 0.05488 | 0.07695 | 0.10876 | 0.08828 | 0.1088  | 0.18048 | 0.24702 | 0.3176  | 0.36314 |
| 675.8  | 0.05436 | 0.07535 | 0.10703 | 0.0863  | 0.10699 | 0.17769 | 0.24444 | 0.31227 | 0.35868 |
| 676.57 | 0.05318 | 0.07448 | 0.10532 | 0.08499 | 0.10507 | 0.17543 | 0.24177 | 0.30881 | 0.35386 |
| 677.34 | 0.05195 | 0.07255 | 0.10306 | 0.08405 | 0.10344 | 0.17165 | 0.23841 | 0.30389 | 0.34829 |
| 678.11 | 0.05133 | 0.07242 | 0.10136 | 0.08208 | 0.10186 | 0.16985 | 0.23591 | 0.29868 | 0.34415 |
| 678.88 | 0.05081 | 0.07045 | 0.10031 | 0.08077 | 0.09958 | 0.1667  | 0.232   | 0.29639 | 0.34023 |
| 679.65 | 0.04957 | 0.06947 | 0.09873 | 0.07982 | 0.09757 | 0.16461 | 0.2289  | 0.29256 | 0.33591 |
| 680.42 | 0.0486  | 0.0685  | 0.09631 | 0.07775 | 0.09675 | 0.16162 | 0.22687 | 0.28879 | 0.33006 |
| 681.19 | 0.04816 | 0.0672  | 0.09557 | 0.0764  | 0.09488 | 0.15949 | 0.22367 | 0.28517 | 0.32599 |
| 681.96 | 0.04692 | 0.06583 | 0.09415 | 0.07536 | 0.09299 | 0.15645 | 0.22043 | 0.28078 | 0.32245 |
| 682.72 | 0.04644 | 0.0647  | 0.09246 | 0.07403 | 0.09114 | 0.15382 | 0.21707 | 0.27772 | 0.31829 |
| 683.49 | 0.0455  | 0.06325 | 0.09067 | 0.07295 | 0.09006 | 0.15169 | 0.21484 | 0.27399 | 0.31351 |
| 684.26 | 0.04451 | 0.06262 | 0.08916 | 0.07137 | 0.08819 | 0.14907 | 0.2117  | 0.27035 | 0.3091  |
| 685.03 | 0.04417 | 0.06139 | 0.08771 | 0.07069 | 0.08738 | 0.14719 | 0.20916 | 0.26693 | 0.30469 |
| 685.8  | 0.04295 | 0.06076 | 0.08678 | 0.06903 | 0.0854  | 0.14443 | 0.2065  | 0.26379 | 0.3022  |
| 686.57 | 0.04189 | 0.05961 | 0.08487 | 0.06804 | 0.08403 | 0.14276 | 0.20388 | 0.25927 | 0.29758 |

|        |         |         |         |         |         |         |         |         |         |
|--------|---------|---------|---------|---------|---------|---------|---------|---------|---------|
| 687.34 | 0.04175 | 0.05848 | 0.08425 | 0.06681 | 0.08265 | 0.14008 | 0.20098 | 0.25625 | 0.29344 |
| 688.11 | 0.04064 | 0.05733 | 0.08283 | 0.06611 | 0.08157 | 0.13819 | 0.19833 | 0.25259 | 0.28883 |
| 688.87 | 0.04018 | 0.0564  | 0.08132 | 0.06437 | 0.07925 | 0.13606 | 0.19562 | 0.24912 | 0.28386 |
| 689.64 | 0.03962 | 0.0559  | 0.07969 | 0.0635  | 0.07838 | 0.13334 | 0.19319 | 0.24551 | 0.28095 |
| 690.41 | 0.03868 | 0.05469 | 0.07881 | 0.06278 | 0.07778 | 0.13171 | 0.19042 | 0.24353 | 0.27686 |
| 691.18 | 0.03812 | 0.05395 | 0.07695 | 0.06138 | 0.07568 | 0.12998 | 0.18813 | 0.23969 | 0.27326 |
| 691.95 | 0.03746 | 0.05317 | 0.07599 | 0.06009 | 0.07424 | 0.12809 | 0.18544 | 0.2363  | 0.26991 |
| 692.72 | 0.03655 | 0.05224 | 0.07474 | 0.05946 | 0.07346 | 0.12521 | 0.18313 | 0.23226 | 0.26565 |
| 693.48 | 0.03607 | 0.05116 | 0.07348 | 0.05782 | 0.07164 | 0.12344 | 0.18021 | 0.23049 | 0.26205 |
| 694.25 | 0.03565 | 0.05042 | 0.0725  | 0.05705 | 0.07081 | 0.12096 | 0.17736 | 0.22671 | 0.25901 |
| 695.02 | 0.03521 | 0.04955 | 0.07111 | 0.05626 | 0.06975 | 0.11973 | 0.17578 | 0.22364 | 0.25522 |
| 695.79 | 0.03389 | 0.04856 | 0.07008 | 0.05507 | 0.06852 | 0.1175  | 0.17359 | 0.22064 | 0.25252 |
| 696.55 | 0.03359 | 0.04804 | 0.06883 | 0.05481 | 0.06746 | 0.11676 | 0.17083 | 0.21733 | 0.24887 |
| 697.32 | 0.0331  | 0.04671 | 0.06764 | 0.05336 | 0.06565 | 0.11403 | 0.16879 | 0.21439 | 0.24425 |
| 698.09 | 0.03224 | 0.04587 | 0.06713 | 0.0529  | 0.06499 | 0.11276 | 0.16637 | 0.21145 | 0.24131 |
| 698.86 | 0.0317  | 0.04511 | 0.06572 | 0.05152 | 0.06402 | 0.10989 | 0.1646  | 0.20819 | 0.23763 |
| 699.62 | 0.031   | 0.04463 | 0.06437 | 0.0506  | 0.06227 | 0.10864 | 0.16166 | 0.20593 | 0.23366 |
| 700.39 | 0.03092 | 0.04389 | 0.06321 | 0.04987 | 0.06187 | 0.10625 | 0.15926 | 0.20168 | 0.23049 |
| 701.16 | 0.03014 | 0.0429  | 0.06197 | 0.04908 | 0.06053 | 0.10492 | 0.15775 | 0.19986 | 0.22694 |
| 701.93 | 0.02939 | 0.04192 | 0.06085 | 0.04795 | 0.05949 | 0.10333 | 0.15503 | 0.19698 | 0.22398 |
| 702.69 | 0.02929 | 0.04136 | 0.06013 | 0.04734 | 0.05828 | 0.10167 | 0.15243 | 0.19391 | 0.22102 |
| 703.46 | 0.02873 | 0.0406  | 0.05953 | 0.04647 | 0.05728 | 0.09988 | 0.15048 | 0.19128 | 0.21813 |
| 704.23 | 0.02845 | 0.03991 | 0.05811 | 0.04548 | 0.05643 | 0.09837 | 0.14869 | 0.1892  | 0.21492 |
| 704.99 | 0.02779 | 0.03891 | 0.05728 | 0.04461 | 0.05523 | 0.09695 | 0.14671 | 0.18517 | 0.21097 |
| 705.76 | 0.02721 | 0.03876 | 0.05604 | 0.04423 | 0.05443 | 0.09495 | 0.14496 | 0.18304 | 0.20873 |
| 706.53 | 0.02643 | 0.03806 | 0.05553 | 0.04359 | 0.05381 | 0.0935  | 0.14253 | 0.1813  | 0.20656 |
| 707.29 | 0.02617 | 0.03735 | 0.05435 | 0.04231 | 0.0531  | 0.0923  | 0.14064 | 0.17811 | 0.20257 |
| 708.06 | 0.02593 | 0.03687 | 0.0536  | 0.04159 | 0.05164 | 0.09079 | 0.13944 | 0.17589 | 0.20018 |
| 708.83 | 0.02532 | 0.03648 | 0.05269 | 0.04116 | 0.05085 | 0.08913 | 0.13721 | 0.17394 | 0.19788 |
| 709.59 | 0.02504 | 0.03529 | 0.05185 | 0.04074 | 0.05014 | 0.0876  | 0.13512 | 0.17048 | 0.19518 |
| 710.36 | 0.02428 | 0.03494 | 0.05134 | 0.03954 | 0.04868 | 0.08653 | 0.13323 | 0.16912 | 0.19205 |
| 711.13 | 0.02384 | 0.03399 | 0.04978 | 0.03874 | 0.04785 | 0.08459 | 0.13112 | 0.16591 | 0.18859 |
| 711.89 | 0.02376 | 0.0336  | 0.04914 | 0.03814 | 0.04728 | 0.08388 | 0.12886 | 0.1635  | 0.18646 |
| 712.66 | 0.0229  | 0.03308 | 0.04862 | 0.03736 | 0.0461  | 0.08218 | 0.1273  | 0.1616  | 0.18243 |
| 713.42 | 0.02294 | 0.03269 | 0.04742 | 0.03662 | 0.04563 | 0.08093 | 0.12574 | 0.15883 | 0.18042 |
| 714.19 | 0.02242 | 0.03197 | 0.04678 | 0.03633 | 0.04494 | 0.07919 | 0.12379 | 0.15568 | 0.17757 |
| 714.96 | 0.02188 | 0.03134 | 0.04586 | 0.03533 | 0.04379 | 0.07796 | 0.12174 | 0.1542  | 0.17498 |
| 715.72 | 0.02131 | 0.03106 | 0.04472 | 0.03452 | 0.04289 | 0.07591 | 0.11981 | 0.1517  | 0.172   |
| 716.49 | 0.02085 | 0.02978 | 0.04399 | 0.03434 | 0.04206 | 0.07471 | 0.11811 | 0.14872 | 0.1693  |
| 717.25 | 0.02077 | 0.02976 | 0.04307 | 0.03324 | 0.0413  | 0.07376 | 0.11624 | 0.14627 | 0.16622 |
| 718.02 | 0.02021 | 0.02894 | 0.04232 | 0.03278 | 0.04034 | 0.07206 | 0.1139  | 0.14348 | 0.16311 |
| 718.78 | 0.01967 | 0.02811 | 0.04167 | 0.03188 | 0.03986 | 0.07104 | 0.11224 | 0.1418  | 0.15987 |
| 719.55 | 0.01943 | 0.0277  | 0.0409  | 0.03143 | 0.03868 | 0.06926 | 0.11028 | 0.13829 | 0.15737 |
| 720.31 | 0.01883 | 0.02694 | 0.04    | 0.03079 | 0.03761 | 0.06797 | 0.1084  | 0.13669 | 0.15448 |

|        |         |         |         |         |         |         |         |         |         |
|--------|---------|---------|---------|---------|---------|---------|---------|---------|---------|
| 721.08 | 0.01857 | 0.02666 | 0.03913 | 0.03015 | 0.03717 | 0.06687 | 0.1058  | 0.13423 | 0.15182 |
| 721.84 | 0.01813 | 0.02614 | 0.03818 | 0.02945 | 0.03627 | 0.06516 | 0.10468 | 0.13188 | 0.15004 |
| 722.61 | 0.01803 | 0.0254  | 0.03751 | 0.02913 | 0.03561 | 0.06417 | 0.10277 | 0.12954 | 0.14665 |
| 723.37 | 0.01756 | 0.0248  | 0.03665 | 0.02845 | 0.03506 | 0.06252 | 0.1012  | 0.1277  | 0.1446  |
| 724.14 | 0.01732 | 0.02482 | 0.03642 | 0.02807 | 0.03447 | 0.06166 | 0.09932 | 0.12539 | 0.14244 |
| 724.9  | 0.0168  | 0.0241  | 0.03541 | 0.02741 | 0.03369 | 0.06068 | 0.09865 | 0.12426 | 0.14079 |
| 725.67 | 0.0167  | 0.02382 | 0.03539 | 0.02683 | 0.03287 | 0.05985 | 0.09746 | 0.12202 | 0.13849 |
| 726.43 | 0.0162  | 0.02324 | 0.03448 | 0.02635 | 0.03255 | 0.05909 | 0.09584 | 0.12055 | 0.13688 |
| 727.2  | 0.01618 | 0.02287 | 0.03407 | 0.02606 | 0.03215 | 0.05769 | 0.09485 | 0.11954 | 0.13476 |
| 727.96 | 0.01584 | 0.02278 | 0.03327 | 0.02573 | 0.03183 | 0.05765 | 0.09384 | 0.1184  | 0.13294 |
| 728.73 | 0.0155  | 0.02241 | 0.03284 | 0.02544 | 0.03123 | 0.05644 | 0.09297 | 0.11625 | 0.13102 |
| 729.49 | 0.01542 | 0.0222  | 0.03267 | 0.02498 | 0.03088 | 0.05556 | 0.0921  | 0.11538 | 0.12937 |
| 730.25 | 0.01526 | 0.02181 | 0.03227 | 0.02469 | 0.03048 | 0.05539 | 0.09104 | 0.11404 | 0.12941 |
| 731.02 | 0.01498 | 0.02165 | 0.03142 | 0.02428 | 0.02974 | 0.05433 | 0.08945 | 0.11244 | 0.12714 |
| 731.78 | 0.01462 | 0.02094 | 0.03149 | 0.02384 | 0.02967 | 0.05412 | 0.08878 | 0.11108 | 0.12615 |
| 732.55 | 0.01464 | 0.021   | 0.03104 | 0.02338 | 0.02927 | 0.05276 | 0.08779 | 0.1098  | 0.12425 |
| 733.31 | 0.01432 | 0.02057 | 0.03076 | 0.02324 | 0.02858 | 0.05235 | 0.08692 | 0.10869 | 0.12247 |
| 734.07 | 0.01404 | 0.02016 | 0.03046 | 0.023   | 0.02828 | 0.0516  | 0.08563 | 0.10781 | 0.12178 |
| 734.84 | 0.01414 | 0.01988 | 0.02948 | 0.02273 | 0.02769 | 0.051   | 0.08497 | 0.1061  | 0.11962 |
| 735.6  | 0.01361 | 0.01951 | 0.02932 | 0.02242 | 0.02726 | 0.05    | 0.08364 | 0.10461 | 0.11799 |
| 736.36 | 0.01361 | 0.01938 | 0.02865 | 0.02183 | 0.02709 | 0.04944 | 0.08265 | 0.10283 | 0.11672 |
| 737.13 | 0.01345 | 0.01888 | 0.02823 | 0.02172 | 0.0266  | 0.04871 | 0.0815  | 0.10174 | 0.11516 |
| 737.89 | 0.01307 | 0.01856 | 0.0276  | 0.02106 | 0.02615 | 0.04759 | 0.08009 | 0.1004  | 0.11306 |
| 738.65 | 0.01295 | 0.01856 | 0.02755 | 0.02114 | 0.02575 | 0.04723 | 0.07949 | 0.09886 | 0.11158 |
| 739.42 | 0.01261 | 0.01788 | 0.02698 | 0.02058 | 0.02525 | 0.04632 | 0.07807 | 0.09722 | 0.11032 |
| 740.18 | 0.01267 | 0.01777 | 0.02649 | 0.02027 | 0.02483 | 0.04542 | 0.07681 | 0.0958  | 0.10837 |
| 740.94 | 0.01213 | 0.01771 | 0.02616 | 0.0198  | 0.02414 | 0.0446  | 0.07607 | 0.09503 | 0.10711 |
| 741.71 | 0.01207 | 0.01686 | 0.02546 | 0.01939 | 0.02397 | 0.04415 | 0.07458 | 0.09321 | 0.10509 |
| 742.47 | 0.01167 | 0.01678 | 0.02505 | 0.01903 | 0.0234  | 0.04307 | 0.07374 | 0.09141 | 0.10451 |
| 743.23 | 0.01173 | 0.01643 | 0.02472 | 0.01901 | 0.02291 | 0.0427  | 0.07253 | 0.09055 | 0.10224 |
| 744    | 0.01135 | 0.01621 | 0.02437 | 0.01835 | 0.02265 | 0.04178 | 0.07179 | 0.08919 | 0.101   |
| 744.76 | 0.01135 | 0.01615 | 0.02381 | 0.01797 | 0.02227 | 0.041   | 0.07057 | 0.0876  | 0.09853 |
| 745.52 | 0.01099 | 0.0155  | 0.02341 | 0.0177  | 0.02173 | 0.04081 | 0.06951 | 0.08678 | 0.09718 |
| 746.28 | 0.01079 | 0.01543 | 0.02319 | 0.01749 | 0.02152 | 0.03977 | 0.06883 | 0.0852  | 0.09596 |
| 747.05 | 0.01077 | 0.01472 | 0.02265 | 0.01724 | 0.0208  | 0.03891 | 0.06767 | 0.0842  | 0.09493 |
| 747.81 | 0.01019 | 0.01485 | 0.02242 | 0.01689 | 0.02055 | 0.03851 | 0.06676 | 0.08209 | 0.09286 |
| 748.57 | 0.00993 | 0.01437 | 0.02158 | 0.01676 | 0.02026 | 0.03756 | 0.06583 | 0.08088 | 0.09133 |
| 749.33 | 0.00991 | 0.0142  | 0.02137 | 0.01609 | 0.01979 | 0.03704 | 0.06468 | 0.08027 | 0.08999 |
| 750.09 | 0.00987 | 0.01402 | 0.02081 | 0.01585 | 0.01931 | 0.03642 | 0.0634  | 0.07863 | 0.08877 |
| 750.86 | 0.00968 | 0.01359 | 0.02037 | 0.01539 | 0.01924 | 0.03571 | 0.06308 | 0.07753 | 0.08784 |
| 751.62 | 0.00964 | 0.01359 | 0.02009 | 0.0155  | 0.0188  | 0.03553 | 0.062   | 0.07608 | 0.08613 |
| 752.38 | 0.00938 | 0.01314 | 0.01995 | 0.0151  | 0.01856 | 0.03456 | 0.06098 | 0.07505 | 0.08506 |
| 753.14 | 0.00926 | 0.01311 | 0.0196  | 0.01486 | 0.01795 | 0.03409 | 0.05997 | 0.07387 | 0.08371 |
| 753.9  | 0.00898 | 0.01288 | 0.01925 | 0.01471 | 0.01782 | 0.03375 | 0.0591  | 0.07297 | 0.08223 |

|        |         |         |         |         |         |         |         |         |         |
|--------|---------|---------|---------|---------|---------|---------|---------|---------|---------|
| 754.67 | 0.00892 | 0.01257 | 0.01893 | 0.01418 | 0.01752 | 0.0328  | 0.05795 | 0.07144 | 0.08107 |
| 755.43 | 0.00872 | 0.01246 | 0.01858 | 0.01406 | 0.01736 | 0.03226 | 0.05809 | 0.07075 | 0.08041 |
| 756.19 | 0.00828 | 0.01184 | 0.01833 | 0.0136  | 0.0169  | 0.03181 | 0.05631 | 0.06979 | 0.07884 |
| 756.95 | 0.00842 | 0.01197 | 0.0177  | 0.01357 | 0.01639 | 0.03135 | 0.05597 | 0.06893 | 0.0772  |
| 757.71 | 0.00816 | 0.0116  | 0.01739 | 0.01323 | 0.01624 | 0.03065 | 0.05478 | 0.06716 | 0.07617 |
| 758.47 | 0.00814 | 0.01147 | 0.01718 | 0.01306 | 0.01584 | 0.03021 | 0.05399 | 0.06648 | 0.0746  |
| 759.23 | 0.00788 | 0.01127 | 0.01697 | 0.01287 | 0.01572 | 0.02944 | 0.05317 | 0.06519 | 0.07319 |
| 759.99 | 0.0078  | 0.01092 | 0.01647 | 0.01239 | 0.01509 | 0.02894 | 0.0525  | 0.064   | 0.07197 |
| 760.76 | 0.0078  | 0.01077 | 0.01614 | 0.01254 | 0.01518 | 0.02858 | 0.05167 | 0.06326 | 0.07073 |
| 761.52 | 0.0075  | 0.01058 | 0.016   | 0.0121  | 0.01478 | 0.02793 | 0.05055 | 0.06214 | 0.06961 |
| 762.28 | 0.00738 | 0.01025 | 0.01551 | 0.01198 | 0.01459 | 0.02761 | 0.0496  | 0.06133 | 0.0688  |
| 763.04 | 0.00718 | 0.0101  | 0.0153  | 0.01172 | 0.01404 | 0.02677 | 0.04882 | 0.06006 | 0.06755 |
| 763.8  | 0.0071  | 0.01012 | 0.01484 | 0.01131 | 0.01404 | 0.02675 | 0.04825 | 0.05946 | 0.06683 |
| 764.56 | 0.00696 | 0.00984 | 0.01476 | 0.01128 | 0.01381 | 0.02612 | 0.04764 | 0.05799 | 0.06541 |
| 765.32 | 0.0068  | 0.00947 | 0.01444 | 0.01099 | 0.01347 | 0.0253  | 0.04687 | 0.0571  | 0.06453 |
| 766.08 | 0.00644 | 0.00941 | 0.01416 | 0.01089 | 0.01315 | 0.02532 | 0.04606 | 0.05631 | 0.06351 |
| 766.84 | 0.00646 | 0.00919 | 0.01365 | 0.01046 | 0.01305 | 0.02485 | 0.04523 | 0.05545 | 0.06308 |
| 767.6  | 0.00658 | 0.00897 | 0.01353 | 0.01039 | 0.0127  | 0.02412 | 0.04445 | 0.05453 | 0.06216 |
| 768.36 | 0.00632 | 0.00878 | 0.0133  | 0.01015 | 0.01255 | 0.02395 | 0.0444  | 0.05389 | 0.06091 |
| 769.12 | 0.00624 | 0.00858 | 0.01325 | 0.00997 | 0.0121  | 0.02328 | 0.04369 | 0.05319 | 0.05999 |
| 769.88 | 0.00636 | 0.00874 | 0.01283 | 0.00988 | 0.0121  | 0.02324 | 0.0428  | 0.05216 | 0.059   |
| 770.64 | 0.00592 | 0.00822 | 0.01276 | 0.00939 | 0.01182 | 0.02272 | 0.04266 | 0.05194 | 0.05853 |
| 771.4  | 0.00606 | 0.00837 | 0.01249 | 0.00962 | 0.01165 | 0.02229 | 0.04148 | 0.05107 | 0.05729 |
| 772.16 | 0.00581 | 0.008   | 0.0123  | 0.00939 | 0.01144 | 0.0221  | 0.04126 | 0.05038 | 0.05703 |
| 772.92 | 0.00575 | 0.00815 | 0.01205 | 0.00933 | 0.01113 | 0.02181 | 0.04049 | 0.04938 | 0.0565  |
| 773.68 | 0.00563 | 0.00796 | 0.0119  | 0.0091  | 0.01106 | 0.02136 | 0.0401  | 0.04898 | 0.05553 |
| 774.44 | 0.00551 | 0.00759 | 0.01169 | 0.00903 | 0.01081 | 0.02104 | 0.03976 | 0.04808 | 0.05478 |
| 775.2  | 0.00549 | 0.00752 | 0.01169 | 0.00879 | 0.01052 | 0.02098 | 0.03925 | 0.04727 | 0.05419 |
| 775.96 | 0.00539 | 0.00733 | 0.01126 | 0.00865 | 0.01042 | 0.02061 | 0.03836 | 0.04694 | 0.05309 |
| 776.72 | 0.00541 | 0.00733 | 0.01118 | 0.00858 | 0.01043 | 0.02024 | 0.03815 | 0.0462  | 0.05198 |
| 777.48 | 0.00521 | 0.00713 | 0.01095 | 0.00841 | 0.01005 | 0.01973 | 0.03785 | 0.04565 | 0.05209 |
| 778.24 | 0.00515 | 0.00709 | 0.01072 | 0.00812 | 0.01002 | 0.01943 | 0.03689 | 0.04473 | 0.05067 |
| 779    | 0.00499 | 0.007   | 0.01056 | 0.00794 | 0.00972 | 0.01927 | 0.0365  | 0.04411 | 0.05031 |
| 779.76 | 0.00501 | 0.007   | 0.0103  | 0.00792 | 0.00981 | 0.01889 | 0.0358  | 0.04324 | 0.04881 |
| 780.51 | 0.00479 | 0.00661 | 0.01025 | 0.00771 | 0.00936 | 0.0185  | 0.03532 | 0.04317 | 0.04883 |
| 781.27 | 0.00477 | 0.0065  | 0.00986 | 0.00759 | 0.00924 | 0.01805 | 0.03504 | 0.04225 | 0.04774 |
| 782.03 | 0.00481 | 0.00637 | 0.00995 | 0.00734 | 0.00908 | 0.01775 | 0.03417 | 0.04129 | 0.04743 |
| 782.79 | 0.00459 | 0.00635 | 0.00958 | 0.0073  | 0.00894 | 0.01742 | 0.03397 | 0.0408  | 0.04634 |
| 783.55 | 0.00451 | 0.00624 | 0.0094  | 0.0071  | 0.00886 | 0.01691 | 0.03344 | 0.04008 | 0.04574 |
| 784.31 | 0.00447 | 0.0059  | 0.00923 | 0.00689 | 0.00866 | 0.01701 | 0.03272 | 0.03958 | 0.04493 |
| 785.07 | 0.00441 | 0.00587 | 0.00916 | 0.00684 | 0.00835 | 0.01675 | 0.03233 | 0.03909 | 0.04418 |
| 785.82 | 0.00439 | 0.00566 | 0.00886 | 0.00671 | 0.0082  | 0.01609 | 0.03151 | 0.03837 | 0.04362 |
| 786.58 | 0.00409 | 0.00561 | 0.00868 | 0.00659 | 0.00808 | 0.01592 | 0.03139 | 0.03765 | 0.04285 |
| 787.34 | 0.00419 | 0.00564 | 0.0084  | 0.00654 | 0.00799 | 0.01578 | 0.03084 | 0.03694 | 0.04197 |

|        |         |         |         |         |         |         |         |         |         |
|--------|---------|---------|---------|---------|---------|---------|---------|---------|---------|
| 788.1  | 0.00395 | 0.00535 | 0.00823 | 0.00654 | 0.00766 | 0.01542 | 0.0304  | 0.03659 | 0.04165 |
| 788.86 | 0.00383 | 0.00533 | 0.00811 | 0.00614 | 0.0078  | 0.01508 | 0.03008 | 0.03616 | 0.04116 |
| 789.62 | 0.00375 | 0.00531 | 0.00793 | 0.00611 | 0.00752 | 0.0148  | 0.0292  | 0.03519 | 0.0406  |
| 790.37 | 0.00387 | 0.00522 | 0.00786 | 0.00597 | 0.0073  | 0.01473 | 0.02893 | 0.03471 | 0.03976 |
| 791.13 | 0.00377 | 0.00501 | 0.00777 | 0.00592 | 0.00723 | 0.01451 | 0.02886 | 0.03444 | 0.03861 |
| 791.89 | 0.00367 | 0.00494 | 0.00756 | 0.0057  | 0.00698 | 0.01421 | 0.02783 | 0.03341 | 0.03869 |
| 792.65 | 0.00359 | 0.00481 | 0.00747 | 0.00556 | 0.00702 | 0.01374 | 0.02789 | 0.03309 | 0.03777 |
| 793.4  | 0.00349 | 0.00475 | 0.00733 | 0.00548 | 0.00678 | 0.01352 | 0.02697 | 0.03249 | 0.03747 |
| 794.16 | 0.00345 | 0.00455 | 0.00681 | 0.00529 | 0.00659 | 0.01337 | 0.02675 | 0.03199 | 0.0364  |
| 794.92 | 0.00339 | 0.00468 | 0.00705 | 0.00553 | 0.00669 | 0.01344 | 0.02628 | 0.03159 | 0.0364  |
| 795.68 | 0.00323 | 0.00434 | 0.00684 | 0.00514 | 0.00627 | 0.01275 | 0.02601 | 0.031   | 0.03537 |
| 796.43 | 0.00325 | 0.00421 | 0.00661 | 0.00515 | 0.00613 | 0.01277 | 0.02557 | 0.03048 | 0.0348  |
| 797.19 | 0.00319 | 0.00414 | 0.00668 | 0.00502 | 0.00619 | 0.01227 | 0.0253  | 0.02997 | 0.03443 |
| 797.95 | 0.00311 | 0.00403 | 0.00647 | 0.00495 | 0.00589 | 0.01189 | 0.02477 | 0.02932 | 0.03357 |
| 798.7  | 0.00299 | 0.00408 | 0.00626 | 0.00469 | 0.00584 | 0.01187 | 0.02437 | 0.02916 | 0.03308 |
| 799.46 | 0.00295 | 0.00403 | 0.00586 | 0.00485 | 0.00577 | 0.0115  | 0.02405 | 0.02868 | 0.03272 |
| 800.22 | 0.00295 | 0.00386 | 0.00595 | 0.00459 | 0.00563 | 0.01157 | 0.02359 | 0.02835 | 0.03205 |
| 800.98 | 0.00285 | 0.00371 | 0.00577 | 0.00444 | 0.00553 | 0.01105 | 0.02339 | 0.02776 | 0.03162 |
| 801.73 | 0.00265 | 0.00375 | 0.00572 | 0.0044  | 0.00548 | 0.01101 | 0.02283 | 0.02695 | 0.0313  |
| 802.49 | 0.00275 | 0.00351 | 0.00565 | 0.00418 | 0.00518 | 0.0106  | 0.0227  | 0.0267  | 0.03075 |
| 803.25 | 0.00263 | 0.00349 | 0.00549 | 0.00423 | 0.00518 | 0.01062 | 0.02231 | 0.02646 | 0.03055 |
| 804    | 0.00267 | 0.0034  | 0.00528 | 0.0041  | 0.00509 | 0.01029 | 0.0218  | 0.02611 | 0.02959 |
| 804.76 | 0.00237 | 0.00334 | 0.00525 | 0.00394 | 0.00501 | 0.01023 | 0.02111 | 0.02552 | 0.02939 |
| 805.51 | 0.00253 | 0.00345 | 0.00516 | 0.00398 | 0.00484 | 0.00999 | 0.02115 | 0.02526 | 0.02886 |
| 806.27 | 0.00243 | 0.00314 | 0.00518 | 0.00389 | 0.00463 | 0.00969 | 0.0207  | 0.02436 | 0.02843 |
| 807.03 | 0.00225 | 0.00312 | 0.00482 | 0.00377 | 0.0047  | 0.00952 | 0.02021 | 0.02416 | 0.02798 |
| 807.78 | 0.00235 | 0.00306 | 0.00475 | 0.00372 | 0.00451 | 0.00947 | 0.0201  | 0.02379 | 0.02759 |
| 808.54 | 0.00235 | 0.00308 | 0.00461 | 0.00365 | 0.00449 | 0.00932 | 0.01971 | 0.02357 | 0.02698 |
| 809.29 | 0.00243 | 0.00295 | 0.00456 | 0.00362 | 0.00438 | 0.00909 | 0.01971 | 0.02324 | 0.02676 |
| 810.05 | 0.00217 | 0.00273 | 0.00451 | 0.00348 | 0.00433 | 0.00881 | 0.01936 | 0.02304 | 0.02616 |

Supplementary Figure 17

| Relative pressure $P/P_0$ | Uptake ( $\text{cm}^3 \cdot \text{g}^{-1}$ , STP) | Relative pressure $P/P_0$ | Uptake ( $\text{cm}^3 \cdot \text{g}^{-1}$ , STP) | Relative pressure $P/P_0$ | Uptake ( $\text{cm}^3 \cdot \text{g}^{-1}$ , STP) | Relative pressure $P/P_0$ | Uptake ( $\text{cm}^3 \cdot \text{g}^{-1}$ , STP) |
|---------------------------|---------------------------------------------------|---------------------------|---------------------------------------------------|---------------------------|---------------------------------------------------|---------------------------|---------------------------------------------------|
| 0.0044                    | 1.8501                                            | 0.95028                   | 14.7273                                           | 0.00658                   | 0.09146                                           | 0.99376                   | 1.90844                                           |
| 0.00786                   | 4.018                                             | 0.90519                   | 15.2156                                           | 0.0116                    | 0.11256                                           | 0.94257                   | 1.00622                                           |
| 0.01197                   | 6.1753                                            | 0.85495                   | 15.6055                                           | 0.02324                   | 0.13413                                           | 0.90639                   | 0.84091                                           |
| 0.02293                   | 8.1727                                            | 0.80527                   | 15.9163                                           | 0.03475                   | 0.1529                                            | 0.87128                   | 0.7552                                            |
| 0.03358                   | 8.7201                                            | 0.75544                   | 16.1694                                           | 0.04005                   | 0.15889                                           | 0.83611                   | 0.68153                                           |
| 0.04556                   | 9.0048                                            | 0.70554                   | 16.3688                                           | 0.05794                   | 0.18253                                           | 0.80115                   | 0.63831                                           |
| 0.05714                   | 9.2338                                            | 0.65484                   | 16.5033                                           | 0.08541                   | 0.21881                                           | 0.76596                   | 0.60638                                           |
| 0.06043                   | 9.3418                                            | 0.60583                   | 16.5988                                           | 0.12039                   | 0.26055                                           | 0.73104                   | 0.57626                                           |
| 0.07033                   | 9.4989                                            | 0.55508                   | 16.6247                                           | 0.15529                   | 0.29239                                           | 0.6959                    | 0.55476                                           |
| 0.08014                   | 9.6407                                            | 0.50488                   | 16.6005                                           | 0.19023                   | 0.31906                                           | 0.66089                   | 0.53201                                           |
| 0.09045                   | 9.7445                                            | 0.4748                    | 16.5608                                           | 0.22518                   | 0.34398                                           | 0.62587                   | 0.515                                             |
| 0.10073                   | 9.8087                                            | 0.4248                    | 16.4811                                           | 0.2794                    | 0.37586                                           | 0.59079                   | 0.49012                                           |
| 0.11013                   | 9.934                                             | 0.37477                   | 16.3812                                           | 0.31432                   | 0.39773                                           | 0.55579                   | 0.46393                                           |
| 0.12015                   | 10.0137                                           | 0.32496                   | 16.2607                                           | 0.34927                   | 0.40884                                           | 0.5209                    | 0.44594                                           |
| 0.13019                   | 10.0933                                           | 0.27503                   | 16.1124                                           | 0.38415                   | 0.41491                                           | 0.48591                   | 0.40117                                           |
| 0.14009                   | 10.1867                                           | 0.22488                   | 15.9613                                           | 0.41916                   | 0.43462                                           | 0.45078                   | 0.37742                                           |
| 0.15065                   | 10.2709                                           | 0.17512                   | 15.7707                                           | 0.45424                   | 0.44436                                           | 0.41577                   | 0.35688                                           |
| 0.16072                   | 10.3552                                           | 0.15004                   | 15.6575                                           | 0.48916                   | 0.4537                                            | 0.38076                   | 0.34138                                           |
| 0.18009                   | 10.453                                            | 0.12502                   | 15.5478                                           | 0.52409                   | 0.458                                             | 0.34575                   | 0.31427                                           |
| 0.20038                   | 10.56                                             | 0.10011                   | 15.4418                                           | 0.55912                   | 0.47914                                           | 0.3107                    | 0.29298                                           |
| 0.22562                   | 10.6771                                           | 0.08016                   | 15.3256                                           | 0.59407                   | 0.47994                                           | 0.27565                   | 0.25991                                           |
| 0.24996                   | 10.8024                                           | 0.06015                   | 15.1712                                           | 0.62906                   | 0.48935                                           | 0.24062                   | 0.22254                                           |
| 0.29988                   | 10.9528                                           | 0.05011                   | 15.057                                            | 0.66404                   | 0.49817                                           | 0.20561                   | 0.19737                                           |
| 0.35043                   | 11.1159                                           | 0.04005                   | 14.949                                            | 0.69904                   | 0.51787                                           | 0.17059                   | 0.16947                                           |
| 0.39968                   | 11.2951                                           | 0.03029                   | 14.7577                                           | 0.734                     | 0.52414                                           | 0.13559                   | 0.12504                                           |
| 0.45051                   | 11.4993                                           | 0.02019                   | 14.4473                                           | 0.76902                   | 0.54982                                           | 0.10216                   | 0.09036                                           |
| 0.50051                   | 11.7264                                           | 0.01024                   | 13.4268                                           | 0.80391                   | 0.58554                                           | 0.0724                    | 0.06253                                           |
| 0.55044                   | 11.9633                                           |                           |                                                   | 0.83897                   | 0.6299                                            | 0.04267                   | 0.01283                                           |
| 0.60048                   | 12.2299                                           |                           |                                                   | 0.87389                   | 0.68475                                           |                           |                                                   |
| 0.65025                   | 12.5305                                           |                           |                                                   | 0.9089                    | 0.76945                                           |                           |                                                   |
| 0.70055                   | 12.8535                                           |                           |                                                   | 0.92527                   | 0.83672                                           |                           |                                                   |
| 0.75031                   | 13.2042                                           |                           |                                                   | 0.95998                   | 1.04168                                           |                           |                                                   |
| 0.80042                   | 13.566                                            |                           |                                                   | 0.99376                   | 1.90844                                           |                           |                                                   |
| 0.85034                   | 13.9517                                           |                           |                                                   |                           |                                                   |                           |                                                   |
| 0.9005                    | 14.3325                                           |                           |                                                   |                           |                                                   |                           |                                                   |
| 0.95028                   | 14.7273                                           |                           |                                                   |                           |                                                   |                           |                                                   |

**Supplementary Figure 18**

| Relative pressure $P/P_0$ | Uptake ( $\text{cm}^3 \cdot \text{g}^{-1}$ , STP) | Relative pressure $P/P_0$ | Uptake ( $\text{cm}^3 \cdot \text{g}^{-1}$ , STP) | Relative pressure $P/P_0$ | Uptake ( $\text{cm}^3 \cdot \text{g}^{-1}$ , STP) | Relative pressure $P/P_0$ | Uptake ( $\text{cm}^3 \cdot \text{g}^{-1}$ , STP) |
|---------------------------|---------------------------------------------------|---------------------------|---------------------------------------------------|---------------------------|---------------------------------------------------|---------------------------|---------------------------------------------------|
| 3.59E-04                  | 1.96428                                           | 0.94605                   | 100.51759                                         | 0.004                     | 0.29423                                           | 0.99436                   | 3.81087                                           |
| 0.00169                   | 4.49223                                           | 0.92969                   | 101.1416                                          | 0.00615                   | 0.37752                                           | 0.94219                   | 2.21319                                           |
| 0.00353                   | 7.04066                                           | 0.88128                   | 101.86631                                         | 0.01009                   | 0.43388                                           | 0.9065                    | 1.91771                                           |
| 0.00679                   | 8.78214                                           | 0.82565                   | 101.68771                                         | 0.02327                   | 0.49044                                           | 0.87131                   | 1.76554                                           |
| 0.01089                   | 9.71156                                           | 0.77572                   | 101.2623                                          | 0.0349                    | 0.50936                                           | 0.83621                   | 1.66454                                           |
| 0.02094                   | 11.222                                            | 0.7254                    | 100.72814                                         | 0.04648                   | 0.53405                                           | 0.8012                    | 1.60672                                           |
| 0.02956                   | 12.49038                                          | 0.67529                   | 100.0931                                          | 0.05039                   | 0.54176                                           | 0.76613                   | 1.50598                                           |
| 0.04071                   | 13.60864                                          | 0.62447                   | 99.35107                                          | 0.08566                   | 0.58491                                           | 0.73117                   | 1.33467                                           |
| 0.04953                   | 14.42625                                          | 0.57484                   | 98.50496                                          | 0.1206                    | 0.64816                                           | 0.71512                   | 1.2325                                            |
| 0.06028                   | 15.19999                                          | 0.52476                   | 97.38345                                          | 0.17485                   | 0.6953                                            | 0.68015                   | 0.96908                                           |
| 0.06945                   | 15.8202                                           | 0.47937                   | 92.74258                                          | 0.2097                    | 0.74502                                           | 0.62597                   | 0.66391                                           |
| 0.08045                   | 16.54341                                          | 0.44079                   | 74.73543                                          | 0.24457                   | 0.7672                                            | 0.59095                   | 0.56934                                           |
| 0.09008                   | 17.09493                                          | 0.4307                    | 70.41144                                          | 0.2794                    | 0.78149                                           | 0.55584                   | 0.50483                                           |
| 0.10036                   | 17.67736                                          | 0.4075                    | 59.44505                                          | 0.31425                   | 0.79191                                           | 0.52083                   | 0.47201                                           |
| 0.10998                   | 18.1691                                           | 0.38366                   | 48.60644                                          | 0.34915                   | 0.81455                                           | 0.48582                   | 0.445                                             |
| 0.11993                   | 18.69042                                          | 0.37492                   | 44.92319                                          | 0.38427                   | 0.80894                                           | 0.45079                   | 0.39654                                           |
| 0.13023                   | 19.22349                                          | 0.32858                   | 36.86533                                          | 0.41922                   | 0.79722                                           | 0.41572                   | 0.34117                                           |
| 0.1403                    | 19.63826                                          | 0.27268                   | 34.24053                                          | 0.45425                   | 0.79937                                           | 0.38088                   | 0.33391                                           |
| 0.14995                   | 20.08375                                          | 0.22421                   | 30.47638                                          | 0.4891                    | 0.79662                                           | 0.34582                   | 0.34397                                           |
| 0.16                      | 20.47548                                          | 0.17174                   | 27.40212                                          | 0.5241                    | 0.80762                                           | 0.31074                   | 0.33575                                           |
| 0.18035                   | 21.19371                                          | 0.15148                   | 26.13285                                          | 0.55913                   | 0.79288                                           | 0.27572                   | 0.31039                                           |
| 0.20088                   | 21.84341                                          | 0.12523                   | 24.25979                                          | 0.59404                   | 0.80661                                           | 0.24064                   | 0.28036                                           |
| 0.22537                   | 22.57394                                          | 0.09987                   | 22.38935                                          | 0.62914                   | 0.8131                                            | 0.20562                   | 0.26612                                           |
| 0.25102                   | 23.26727                                          | 0.07999                   | 20.95077                                          | 0.66398                   | 0.82937                                           | 0.17059                   | 0.23223                                           |
| 0.29989                   | 24.29908                                          | 0.0605                    | 19.29326                                          | 0.69903                   | 0.89168                                           | 0.13559                   | 0.20505                                           |
| 0.35112                   | 25.33819                                          | 0.04992                   | 18.29744                                          | 0.73396                   | 0.98308                                           | 0.10215                   | 0.11056                                           |
| 0.40058                   | 26.17049                                          | 0.04012                   | 17.28274                                          | 0.76901                   | 1.13709                                           | 0.07236                   | 0.02381                                           |
| 0.44934                   | 26.95525                                          | 0.03021                   | 16.09871                                          | 0.80391                   | 1.34237                                           | 0.04264                   | -0.0545                                           |
| 0.50076                   | 27.64564                                          | 0.0203                    | 14.60537                                          | 0.81993                   | 1.45446                                           |                           |                                                   |
| 0.55036                   | 28.26606                                          | 0.00982                   | 12.41045                                          | 0.85503                   | 1.67516                                           |                           |                                                   |
| 0.60049                   | 28.85299                                          |                           |                                                   | 0.89001                   | 1.79467                                           |                           |                                                   |
| 0.65026                   | 29.38185                                          |                           |                                                   | 0.94376                   | 2.09255                                           |                           |                                                   |
| 0.70052                   | 29.89488                                          |                           |                                                   | 0.96                      | 2.30119                                           |                           |                                                   |
| 0.75042                   | 30.39761                                          |                           |                                                   | 0.99436                   | 3.81087                                           |                           |                                                   |
| 0.80049                   | 30.92246                                          |                           |                                                   |                           |                                                   |                           |                                                   |
| 0.82878                   | 52.39248                                          |                           |                                                   |                           |                                                   |                           |                                                   |
| 0.84931                   | 59.7437                                           |                           |                                                   |                           |                                                   |                           |                                                   |
| 0.88379                   | 77.87087                                          |                           |                                                   |                           |                                                   |                           |                                                   |
| 0.89639                   | 80.41749                                          |                           |                                                   |                           |                                                   |                           |                                                   |
| 0.93223                   | 98.91547                                          |                           |                                                   |                           |                                                   |                           |                                                   |
| 0.94605                   | 100.51759                                         |                           |                                                   |                           |                                                   |                           |                                                   |

**Supplementary Figure 19**

| Relative pressure $P/P_0$ | Uptake ( $\text{cm}^3 \cdot \text{g}^{-1}$ , STP) | Relative pressure $P/P_0$ | Uptake ( $\text{cm}^3 \cdot \text{g}^{-1}$ , STP) | Relative pressure $P/P_0$ | Uptake ( $\text{cm}^3 \cdot \text{g}^{-1}$ , STP) | Relative pressure $P/P_0$ | Uptake ( $\text{cm}^3 \cdot \text{g}^{-1}$ , STP) |
|---------------------------|---------------------------------------------------|---------------------------|---------------------------------------------------|---------------------------|---------------------------------------------------|---------------------------|---------------------------------------------------|
| 9.16E-03                  | 1.35682                                           | 0.95555                   | 91.69054                                          | 0.00662                   | 0.12119                                           | 0.9931                    | 2.82635                                           |
| 0.01963                   | 2.25493                                           | 0.90602                   | 91.63448                                          | 0.01162                   | 0.14302                                           | 0.94315                   | 1.09259                                           |
| 0.021                     | 3.1929                                            | 0.85651                   | 91.36891                                          | 0.02324                   | 0.18073                                           | 0.90643                   | 0.89418                                           |
| 0.03234                   | 3.78251                                           | 0.80711                   | 90.96701                                          | 0.03063                   | 0.20566                                           | 0.8712                    | 0.81941                                           |
| 0.04466                   | 4.33168                                           | 0.77521                   | 90.64417                                          | 0.04041                   | 0.21825                                           | 0.83613                   | 0.75272                                           |
| 0.04987                   | 4.579                                             | 0.7242                    | 90.11599                                          | 0.05794                   | 0.25431                                           | 0.80107                   | 0.70165                                           |
| 0.06114                   | 4.85094                                           | 0.67462                   | 89.51834                                          | 0.0854                    | 0.30121                                           | 0.76603                   | 0.65875                                           |
| 0.07025                   | 5.03973                                           | 0.62453                   | 88.80428                                          | 0.1204                    | 0.33679                                           | 0.73092                   | 0.62037                                           |
| 0.07973                   | 5.35256                                           | 0.5756                    | 87.99789                                          | 0.15531                   | 0.37173                                           | 0.69597                   | 0.5851                                            |
| 0.09026                   | 5.49583                                           | 0.52478                   | 86.96303                                          | 0.20958                   | 0.41169                                           | 0.66087                   | 0.55921                                           |
| 0.10059                   | 5.65721                                           | 0.4755                    | 85.36795                                          | 0.24452                   | 0.43035                                           | 0.62589                   | 0.5309                                            |
| 0.10996                   | 5.88999                                           | 0.44145                   | 73.79266                                          | 0.27941                   | 0.46746                                           | 0.59079                   | 0.52976                                           |
| 0.12027                   | 5.95835                                           | 0.43204                   | 62.59908                                          | 0.31429                   | 0.48209                                           | 0.55574                   | 0.50629                                           |
| 0.1304                    | 6.12535                                           | 0.42409                   | 54.41107                                          | 0.34922                   | 0.50344                                           | 0.52094                   | 0.49127                                           |
| 0.14026                   | 6.40376                                           | 0.40986                   | 43.49278                                          | 0.38412                   | 0.52352                                           | 0.48572                   | 0.47704                                           |
| 0.14968                   | 6.60122                                           | 0.38416                   | 33.0633                                           | 0.41907                   | 0.52554                                           | 0.45082                   | 0.44004                                           |
| 0.15989                   | 6.871                                             | 0.36138                   | 30.69477                                          | 0.45419                   | 0.53825                                           | 0.41579                   | 0.42638                                           |
| 0.17998                   | 7.02396                                           | 0.31231                   | 28.0372                                           | 0.48914                   | 0.56227                                           | 0.38075                   | 0.40421                                           |
| 0.19984                   | 7.40334                                           | 0.26227                   | 25.43853                                          | 0.52408                   | 0.59113                                           | 0.34575                   | 0.38525                                           |
| 0.22508                   | 7.68457                                           | 0.22693                   | 22.9186                                           | 0.55907                   | 0.58892                                           | 0.31066                   | 0.36293                                           |
| 0.25019                   | 8.20359                                           | 0.17198                   | 20.16983                                          | 0.59402                   | 0.60197                                           | 0.27568                   | 0.32246                                           |
| 0.29941                   | 9.41858                                           | 0.13554                   | 18.26598                                          | 0.62908                   | 0.61911                                           | 0.24063                   | 0.28419                                           |
| 0.34929                   | 10.53406                                          | 0.12509                   | 17.63934                                          | 0.66402                   | 0.61091                                           | 0.2056                    | 0.23274                                           |
| 0.3993                    | 11.71979                                          | 0.09965                   | 16.11003                                          | 0.69905                   | 0.62317                                           | 0.17058                   | 0.19977                                           |
| 0.44965                   | 13.00247                                          | 0.08032                   | 14.85418                                          | 0.73403                   | 0.63142                                           | 0.13562                   | 0.15765                                           |
| 0.5003                    | 14.50011                                          | 0.06052                   | 13.30241                                          | 0.76894                   | 0.66865                                           | 0.10214                   | 0.11892                                           |
| 0.54862                   | 16.90699                                          | 0.04983                   | 12.32782                                          | 0.80399                   | 0.67952                                           | 0.07237                   | 0.06944                                           |
| 0.6051                    | 18.75212                                          | 0.03995                   | 11.36784                                          | 0.83898                   | 0.72254                                           | 0.04264                   | 0.01349                                           |
| 0.64851                   | 19.91914                                          | 0.02993                   | 10.42739                                          | 0.87391                   | 0.77008                                           |                           |                                                   |
| 0.70044                   | 20.93485                                          | 0.02049                   | 9.4048                                            | 0.90894                   | 0.86679                                           |                           |                                                   |
| 0.74965                   | 21.80662                                          |                           |                                                   | 0.92506                   | 0.91675                                           |                           |                                                   |
| 0.80042                   | 22.62558                                          |                           |                                                   | 0.95985                   | 1.14263                                           |                           |                                                   |
| 0.84987                   | 23.52457                                          |                           |                                                   | 0.9931                    | 2.82635                                           |                           |                                                   |
| 0.86595                   | 43.63142                                          |                           |                                                   |                           |                                                   |                           |                                                   |
| 0.8799                    | 59.82056                                          |                           |                                                   |                           |                                                   |                           |                                                   |
| 0.89759                   | 69.33898                                          |                           |                                                   |                           |                                                   |                           |                                                   |
| 0.92878                   | 84.66794                                          |                           |                                                   |                           |                                                   |                           |                                                   |
| 0.95555                   | 91.69054                                          |                           |                                                   |                           |                                                   |                           |                                                   |



Supplementary Figure 20

| Relative pressure $P/P$ (Uptake ( $\text{cm}^3 \cdot \text{g}^{-1}$ , STP) | Relative pressure $P/P$ (Uptake ( $\text{cm}^3 \cdot \text{g}^{-1}$ , STP) | Relative pressure $P/P$ (Uptake ( $\text{cm}^3 \cdot \text{g}^{-1}$ , STP) | Relative pressure $P/P$ (Uptake ( $\text{cm}^3 \cdot \text{g}^{-1}$ , STP) |
|----------------------------------------------------------------------------|----------------------------------------------------------------------------|----------------------------------------------------------------------------|----------------------------------------------------------------------------|
| 0.00146                                                                    | 1.79439                                                                    | 0.95027                                                                    | 43.62713                                                                   |
| 0.00366                                                                    | 3.0497                                                                     | 0.92484                                                                    | 45.09642                                                                   |
| 0.00626                                                                    | 3.94427                                                                    | 0.87398                                                                    | 46.27475                                                                   |
| 0.00855                                                                    | 4.40997                                                                    | 0.82558                                                                    | 46.69084                                                                   |
| 0.01001                                                                    | 4.68052                                                                    | 0.77778                                                                    | 46.84168                                                                   |
| 0.01946                                                                    | 6.31493                                                                    | 0.73123                                                                    | 46.86113                                                                   |
| 0.03062                                                                    | 7.85488                                                                    | 0.67464                                                                    | 46.66913                                                                   |
| 0.03809                                                                    | 18.31981                                                                   | 0.62485                                                                    | 46.38619                                                                   |
| 0.05135                                                                    | 22.38249                                                                   | 0.57436                                                                    | 45.98402                                                                   |
| 0.05956                                                                    | 23.35304                                                                   | 0.52454                                                                    | 45.51483                                                                   |
| 0.0706                                                                     | 24.19752                                                                   | 0.47488                                                                    | 44.93636                                                                   |
| 0.08069                                                                    | 24.77582                                                                   | 0.42451                                                                    | 44.23801                                                                   |
| 0.0906                                                                     | 25.31976                                                                   | 0.3749                                                                     | 43.36949                                                                   |
| 0.10016                                                                    | 25.79324                                                                   | 0.32498                                                                    | 42.28398                                                                   |
| 0.11055                                                                    | 26.27728                                                                   | 0.27492                                                                    | 40.98373                                                                   |
| 0.12009                                                                    | 26.73764                                                                   | 0.22511                                                                    | 39.33347                                                                   |
| 0.13013                                                                    | 27.14422                                                                   | 0.17502                                                                    | 37.30845                                                                   |
| 0.1405                                                                     | 27.56466                                                                   | 0.14993                                                                    | 36.13145                                                                   |
| 0.15009                                                                    | 27.95438                                                                   | 0.12508                                                                    | 34.77226                                                                   |
| 0.16015                                                                    | 28.28018                                                                   | 0.10013                                                                    | 33.14383                                                                   |
| 0.18059                                                                    | 28.91933                                                                   | 0.08003                                                                    | 31.66613                                                                   |
| 0.2002                                                                     | 29.50281                                                                   | 0.06029                                                                    | 29.83667                                                                   |
| 0.22585                                                                    | 30.17349                                                                   | 0.05009                                                                    | 28.56104                                                                   |
| 0.25088                                                                    | 30.84162                                                                   | 0.04002                                                                    | 27.13718                                                                   |
| 0.30051                                                                    | 31.9295                                                                    | 0.03021                                                                    | 25.48187                                                                   |
| 0.3503                                                                     | 32.96034                                                                   | 0.02041                                                                    | 23.12122                                                                   |
| 0.3996                                                                     | 33.96338                                                                   |                                                                            |                                                                            |
| 0.45066                                                                    | 34.88319                                                                   |                                                                            |                                                                            |
| 0.50049                                                                    | 35.83305                                                                   |                                                                            |                                                                            |
| 0.55063                                                                    | 36.70392                                                                   |                                                                            |                                                                            |
| 0.60053                                                                    | 37.60658                                                                   |                                                                            |                                                                            |
| 0.65057                                                                    | 38.49748                                                                   |                                                                            |                                                                            |
| 0.70035                                                                    | 39.36952                                                                   |                                                                            |                                                                            |
| 0.75058                                                                    | 40.24044                                                                   |                                                                            |                                                                            |
| 0.80027                                                                    | 41.08385                                                                   |                                                                            |                                                                            |
| 0.85056                                                                    | 41.94768                                                                   |                                                                            |                                                                            |
| 0.90036                                                                    | 42.79087                                                                   |                                                                            |                                                                            |
| 0.95027                                                                    | 43.62713                                                                   |                                                                            |                                                                            |
| 0.00199                                                                    | 0.17071                                                                    | 0.99484                                                                    | 4.78709                                                                    |
| 0.00374                                                                    | 0.28153                                                                    | 0.9418                                                                     | 3.22137                                                                    |
| 0.00523                                                                    | 0.37784                                                                    | 0.90637                                                                    | 2.85754                                                                    |
| 0.0101                                                                     | 0.45546                                                                    | 0.87128                                                                    | 2.68652                                                                    |
| 0.02326                                                                    | 0.57469                                                                    | 0.83616                                                                    | 2.57814                                                                    |
| 0.03494                                                                    | 0.62555                                                                    | 0.8011                                                                     | 2.44402                                                                    |
| 0.04643                                                                    | 0.73135                                                                    | 0.76596                                                                    | 2.52812                                                                    |
| 0.05043                                                                    | 0.74089                                                                    | 0.73106                                                                    | 2.31727                                                                    |
| 0.08566                                                                    | 0.89525                                                                    | 0.696                                                                      | 2.10581                                                                    |
| 0.12057                                                                    | 0.95952                                                                    | 0.66092                                                                    | 1.96689                                                                    |
| 0.15549                                                                    | 1.06383                                                                    | 0.62589                                                                    | 1.91842                                                                    |
| 0.2097                                                                     | 1.2198                                                                     | 0.59088                                                                    | 1.84461                                                                    |
| 0.24455                                                                    | 1.32103                                                                    | 0.55583                                                                    | 1.76536                                                                    |
| 0.2794                                                                     | 1.39672                                                                    | 0.52092                                                                    | 1.69725                                                                    |
| 0.3143                                                                     | 1.42351                                                                    | 0.4858                                                                     | 1.56961                                                                    |
| 0.34923                                                                    | 1.54605                                                                    | 0.45091                                                                    | 1.48815                                                                    |
| 0.38424                                                                    | 1.55571                                                                    | 0.41585                                                                    | 1.39323                                                                    |
| 0.41918                                                                    | 1.6491                                                                     | 0.38081                                                                    | 1.35184                                                                    |
| 0.4542                                                                     | 1.7365                                                                     | 0.34578                                                                    | 1.22817                                                                    |
| 0.48917                                                                    | 1.75036                                                                    | 0.31076                                                                    | 1.1308                                                                     |
| 0.52411                                                                    | 1.76898                                                                    | 0.27571                                                                    | 0.99775                                                                    |
| 0.55906                                                                    | 1.84321                                                                    | 0.24066                                                                    | 0.85539                                                                    |
| 0.5941                                                                     | 1.82639                                                                    | 0.20561                                                                    | 0.78627                                                                    |
| 0.62902                                                                    | 1.83822                                                                    | 0.17064                                                                    | 0.61009                                                                    |
| 0.66407                                                                    | 1.87175                                                                    | 0.13562                                                                    | 0.42747                                                                    |
| 0.69898                                                                    | 1.93915                                                                    | 0.10219                                                                    | 0.281                                                                      |
| 0.73401                                                                    | 2.01818                                                                    | 0.07241                                                                    | 0.13738                                                                    |
| 0.76893                                                                    | 2.11192                                                                    | 0.04263                                                                    | -0.06829                                                                   |
| 0.80395                                                                    | 2.23954                                                                    |                                                                            |                                                                            |
| 0.83891                                                                    | 2.37787                                                                    |                                                                            |                                                                            |
| 0.87399                                                                    | 2.43369                                                                    |                                                                            |                                                                            |
| 0.90882                                                                    | 2.53277                                                                    |                                                                            |                                                                            |
| 0.94389                                                                    | 2.8221                                                                     |                                                                            |                                                                            |
| 0.97881                                                                    | 3.47621                                                                    |                                                                            |                                                                            |
| 0.99484                                                                    | 4.78709                                                                    |                                                                            |                                                                            |
